# Supplementary material for: Manifold‐Fused Porphyrin‐Nanographene Conjugates
Source: PubMed Central journal article supplement — Chemistry. 2024 Nov 16;30(69):e202403250. doi: 10.1002/chem.202403250 (PMC11632405; doi:10.1002/chem.202403250), 2024-11-16
Supplement: CHEM-30-e202403250-s001.pdf [file CHEM-30-e202403250-s001.pdf]

# Chemistry–A European Journal

Supporting Information

## **Manifold-Fused Porphyrin-Nanographene Conjugates**

Christoph Oleszak, Christian L. Ritterhoff, Max M. Martin, Bernd Meyer,\* and Norbert Jux\*

# Table of Content

|                                                                     |             |
|---------------------------------------------------------------------|-------------|
| <b>1 General Information.....</b>                                   | <b>S2</b>   |
| <b>2 Synthetic Procedures.....</b>                                  | <b>S3</b>   |
| <b>2.1 Synthesis of Phenyl-Fused Porphyrin-Precursor.....</b>       | <b>S3</b>   |
| <b>2.2 Synthesis of Phenyl-Fused Porphyrin-HBC Conjugates .....</b> | <b>S8</b>   |
| <b>2.3 Synthesis of Trimesityl-Porphyrin Precursor .....</b>        | <b>S13</b>  |
| <b>2.4 Synthesis of Trimesityl-Porphyrin-HBC Conjugates.....</b>    | <b>S16</b>  |
| <b>2.5 Synthesis of HBC-Fused Porphyrin Conjugates .....</b>        | <b>S20</b>  |
| <b>3 Spectral Appendix .....</b>                                    | <b>S26</b>  |
| <b>4 DFT Calculations .....</b>                                     | <b>S96</b>  |
| <b>5 References .....</b>                                           | <b>S134</b> |

# 1 General Information

All chemicals were purchased from Sigma-Aldrich and used without any further purification. Solvents were distilled prior to usage. Dichloromethane was neutralized with  $K_2CO_3$  before distillation. Thin layer chromatography (TLC) was performed on Merck silica gel 60 F524, detected by UV-light (254 nm, 366 nm). Column chromatography and flash column chromatography were performed on Macherey-Nagel silica gel 60 M (deactivated, 230–400 mesh, 0.04–0.063 mm). NMR spectroscopy was performed on Bruker Avance Neo Cryo-Probe DCH ( $^1H$ : 600 MHz,  $^{13}C$ : 150 MHz), Bruker Avance Neo 500 ( $^1H$ : 500 MHz,  $^{13}C$ : 126 MHz) and Bruker Avance 400 ( $^1H$ : 400 MHz,  $^{13}C\{^1H\}$ : 101 MHz). Deuterated solvents were purchased from Sigma-Aldrich and used as received. Chemical shifts are referenced to residual protic impurities in the solvents ( $^1H$ :  $CHCl_3$ : 7.24 ppm) and ( $^1H$ :  $CH_2Cl_2$ : 5.32 ppm) or the deuterated solvent itself ( $^{13}C\{^1H\}$ :  $CDCl_3$ : 77.0 ppm) and ( $^{13}C\{^1H\}$ :  $CD_2Cl_2$ : 53.8 ppm). The resonance multiplicities are indicated as “s” (singlet), “d” (doublet), “t” (triplet), “q” (quartet) and “m” (multiplet). Signals referred to as “bs” (broad singlet) are not clearly resolved or significantly broadened. IR spectra were recorded on a Bruker FT-IR Tensor 27 spectrometer with a Pike MIRacle ATR unit. LDI/MALDI-ToF mass spectrometry was performed on a Bruker Ultraflex Extreme machine. In case of MALDI, the following matrix were used: 2,5-dihydroxybenzoic acid (DHB) or trans-2-[3-(4-*tert*-butylphenyl)-2-methyl-2propenyl-idene]malononitrile (DCTB). High resolution mass spectrometry was performed on a ESI/APPI-ToF mass spectrometer Bruker maXis 4G UHR MS/MS spectrometer, a Bruker micrOTOF II focus TOF MSspectrometer, or on a MALDI-ToF Bruker Ultraflex Extreme spectrometer. Microwave reactions were carried out in a monomode microwave reactor Biotage Initiator+ with an external IR surface temperature sensor. The microwave assisted reactions were carried out exclusively in the fixed hold time mode using an external IR temperature sensor. UV/vis spectroscopy was carried out on a Varian Cary 5000 UV–vis–NIR spectrometer.

## 2 Synthetic Procedures

### 2.1 Synthesis of Phenyl-Fused Porphyrin-Precursor

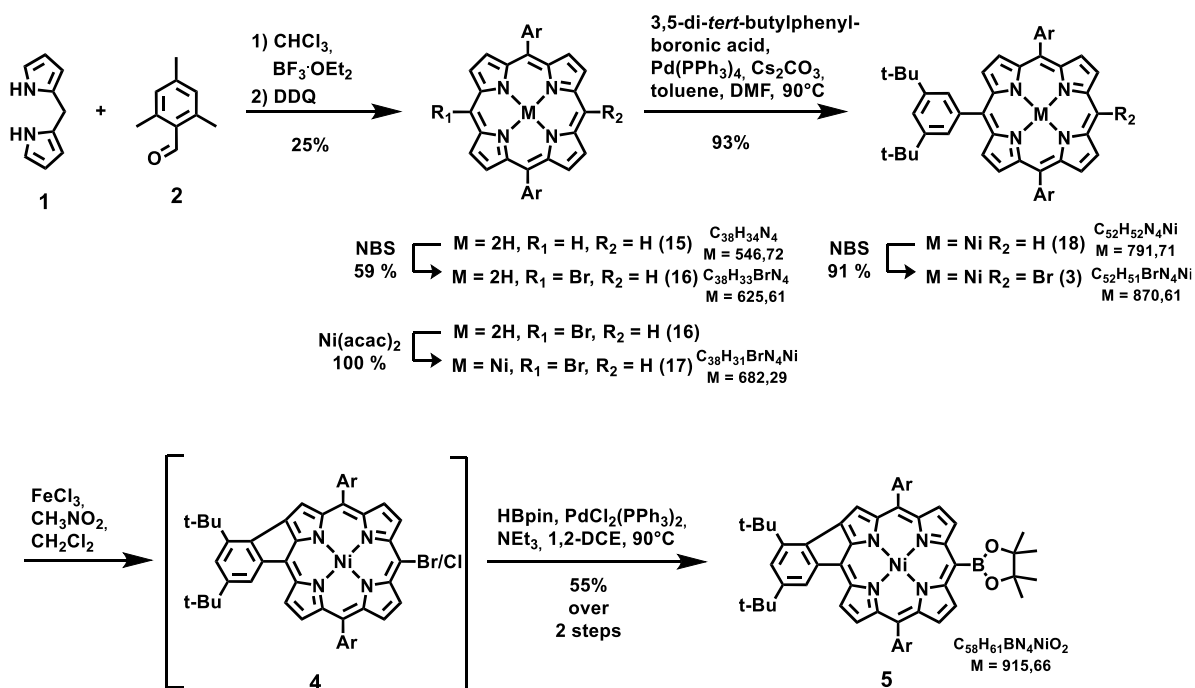

**Scheme S1.** Synthesis of phenyl-fused porphyrin building block **5**. Ar = mesityl.

### 5,15-Dimesitylporphyrin **15**

Adapting a procedure from Chen *et al.*<sup>[1]</sup>, Ethanol (4.5 mL) stabilized  $\text{CHCl}_3$  (600 mL) was degassed for 15 min (bubbling  $\text{N}_2$  through the solution). Dipyrromethane **1** (890 mg, 6.00 mmol, 1 equiv) and mesitaldehyde **2** (885  $\mu\text{L}$ , 6.00 mmol, 1 equiv) were added to the solution, and the reaction was degassed for another 10 min.  $\text{BF}_3 \cdot \text{OEt}_2$  (500  $\mu\text{L}$ ) was added, and the solution was stirred for 3 h at rt under the exclusion of light. DDQ (2.04 g, 9.00 mmol, 3 equiv) was added, and the mixture was stirred for a further 30 min. The acid was quenched via the addition of  $\text{NEt}_3$  (8 mL), and the solvent was removed under reduced pressure. The crude was purified by filtration through silica ( $\text{SiO}_2$ , hexanes/ $\text{CH}_2\text{Cl}_2$ , 1:1,  $\varnothing$  13 x 8 cm). The product **15** was obtained as a purple crystalline solid in 25% yield (407 mg, 744  $\mu\text{mol}$ ).

**<sup>1</sup>H NMR (400 MHz, CD<sub>2</sub>Cl<sub>2</sub>, rt):** δ [ppm]: 10.25 (s, 2H), 9.37 (d, *J* = 4.6 Hz, 4H), 8.86 (d, *J* = 4.6 Hz, 4H), 7.35 (s, 4H), 2.66 (s, 6H), 1.84 (s, 12H), -3.13 (s, 2H).

**<sup>13</sup>C{<sup>1</sup>H} NMR (101 MHz, CDCl<sub>3</sub>, rt):** δ [ppm]: 139.34, 138.00, 137.47, 131.85, 129.92, 127.80, 117.31, 104.45, 21.36, 21.19.

**HRMS (MALDI, DCTB)** for C<sub>38</sub>H<sub>34</sub>N<sub>4</sub> (M<sup>+</sup>), calcd.: 546.2778, found: 546.2793.

### Nickel-5,15-Dimesityl-10-Bromoporphyrin **17**

Adapting a procedure from Mishra *et al.*<sup>[2]</sup>, 5,15-Dimesitylporphyrin **15** (410 mg, 750 μmol, 1 equiv) was dissolved in CHCl<sub>3</sub> (200 mL) and pyridine (320 μL). The mixture was cooled to 0 °C, and NBS (133 mg, 750 μmol, 1 equiv) was added. After stirring for 25 min, the reaction was quenched with acetone (10 mL). The solution was washed with H<sub>2</sub>O (100 mL) and subsequently dried over Na<sub>2</sub>SO<sub>4</sub>. The crude was separated by column chromatography (SiO<sub>2</sub>, hexanes/CH<sub>2</sub>Cl<sub>2</sub>, 3:1, Ø 10 x 30 cm, 2<sup>nd</sup> band). The product was obtained as a purple crystalline solid in 59% yield (278 mg, 444 μmol). 5,15-Dimesityl-10-Bromoporphyrin **16** (226 mg, 361 μmol, 1 equiv) and Ni(acac)<sub>2</sub> (464 mg, 1.81 mmol, 5 equiv) were dissolved in toluene (40 mL). The mixture was heated to reflux for 6 h (heat-on temperature: 140 °C). The solvent was removed under reduced pressure, and the crude was purified by silica plug filtration (SiO<sub>2</sub>, CH<sub>2</sub>Cl<sub>2</sub>, Ø 3.5 cm x 12 cm). After removal of the solvent, the residue was dissolved in CH<sub>2</sub>Cl<sub>2</sub> (10 mL), and the product precipitated with MeOH (50 mL). The precipitate was filtered off and dried *in vacuo*. The product **17** was obtained as a red-brown solid in 100% yield (246 mg, 361 μmol).

**<sup>1</sup>H NMR (400 MHz, CD<sub>2</sub>Cl<sub>2</sub>, rt):** δ [ppm]: 9.80 (s, 1H), 9.55 (d, *J* = 4.9 Hz, 2H), 9.10 (d, *J* = 4.8 Hz, 2H), 8.67 (dd, *J* = 4.9, 1.4 Hz, 4H), 7.26 (s, 4H), 2.59 (s, 6H), 1.78 (s, 12H).

**<sup>13</sup>C{<sup>1</sup>H} NMR (101 MHz, CD<sub>2</sub>Cl<sub>2</sub>, rt):** δ [ppm]: 143.45, 143.26, 142.85, 142.19, 138.86, 138.08, 136.72, 133.30, 132.94, 131.99, 131.85, 127.79, 117.69, 104.86, 21.12, 21.00.

**UV/Vis (CH<sub>2</sub>Cl<sub>2</sub>):** λ [nm] (ε [M<sup>-1</sup>cm<sup>-1</sup>]): 409 (150000), 523 (12000).

**HRMS (MALDI, DCTB)** for C<sub>38</sub>H<sub>31</sub>N<sub>4</sub>NiBr (M<sup>+</sup>), calcd.: 680.1080, found: 680.1041.

**TLC: R<sub>f</sub> [%]:** 0.60 (hexanes/CH<sub>2</sub>Cl<sub>2</sub> 4:1).

### Nickel-5,15-Dimesityl-10-(3,5-di-*tert*-butylphenyl)-Porphyrin **18**

Nickel-5,15-Dimesityl-10-Bromoporphyrin **17** (260 mg, 382  $\mu\text{mol}$ , 1 equiv), 3,5-di-*tert*-butylphenyl boronic acid (179 mg, 764  $\mu\text{mol}$ , 2 equiv),  $\text{Cs}_2\text{CO}_3$  (375 mg, 1.15 mmol, 3 equiv) and  $\text{Pd}(\text{PPh}_3)_4$  (88 mg, 76  $\mu\text{mol}$ , 0.2 equiv) were dissolved in toluene (20 mL) and DMF (10 mL) and were degassed. The reaction mixture was heated to 90 °C for 18 h. After cooling to rt, the solvent was removed under reduced pressure, and the crude was subjected to silica plug filtration (hexanes/ $\text{CH}_2\text{Cl}_2$  - 1:1,  $\varnothing$  3 x 12 cm). The product **18** was obtained in 93% yield (242 mg, 355  $\mu\text{mol}$ ).

**$^1\text{H}$  NMR (400 MHz,  $\text{CDCl}_3$ , rt):  $\delta$  [ppm]:** 9.78 (s, 1H), 9.09 (d,  $J$  = 4.7 Hz, 2H), 8.77 (d,  $J$  = 4.9, 2H), 8.71 (d,  $J$  = 4.7 Hz, 2H), 8.62 (d,  $J$  = 4.9, 2H), 7.91 (d,  $J$  = 1.8, 1H), 7.72 (m, 1H), 7.20 (s, 4H), 2.57 (s, 6H), 1.80 (s, 12H), 1.46 (s, 18H).

**$^{13}\text{C}\{^1\text{H}\}$  NMR (101 MHz,  $\text{CDCl}_3$ , rt):  $\delta$  [ppm]:** 148.80, 142.87, 142.81, 142.67, 142.49, 140.23, 139.08, 137.66, 137.42, 132.75, 132.34, 131.40, 130.79, 129.00, 127.74, 121.00, 120.42, 116.92, 104.10, 35.03, 31.70, 21.43, 21.40.

**UV/Vis ( $\text{CH}_2\text{Cl}_2$ ):  $\lambda$  [nm] ( $\epsilon$  [ $\text{M}^{-1}\text{cm}^{-1}$ ]):** 408 (225000), 521 (16000).

**HRMS (MALDI, DCTB) for  $\text{C}_{52}\text{H}_{52}\text{N}_4\text{Ni}$  ( $\text{M}^+$ ), calcd.:** 790.3540, found: 790.3911.

**TLC:  $R_f$  [%]:** 0.70 (hexanes/ $\text{CH}_2\text{Cl}_2$  3:1).

### Nickel-5,15-Dimesityl-10-(3,5-di-*tert*-butylphenyl)-20-Bromoporphyrin **3**

To a solution of  $\text{CHCl}_3$  (25 mL), pyridine (600  $\mu\text{L}$ ) and Nickel-5,15-Dimesityl-10-(3,5-di-*tert*-butylphenyl)-porphyrin **18** (300 mg, 380  $\mu\text{mol}$ , 1 equiv) NBS (68 mg, 380  $\mu\text{mol}$ , 1 equiv) in  $\text{CHCl}_3$  (7.5 mL) was added slowly at rt. The mixture was stirred for 15 min at rt before the reaction was quenched with acetone (8 mL). The solvents were removed under reduced pressure and the crude was purified by silica plug filtration (hexanes/ $\text{CH}_2\text{Cl}_2$  - 1:1,  $\varnothing$  3 x 12 cm). The product **3** was obtained as a dark-orange solid in 91% yield (301 mg, 346  $\mu\text{mol}$ ).

**$^1\text{H}$  NMR (400 MHz,  $\text{CDCl}_3$ , rt):  $\delta$  [ppm]:** 9.47 (d,  $J$  = 4.9 Hz, 2H), 8.70 (d,  $J$  = 4.9 Hz, 2H), 8.63 (d,  $J$  = 4.9 Hz, 2H), 8.53 (d,  $J$  = 4.9 Hz, 2H), 7.86 (d,  $J$  = 1.8 Hz, 2H), 7.70 (t,  $J$  = 1.9 Hz, 1H), 7.20 (s, 4H), 2.56 (s, 6H), 1.80 (s, 12H), 1.45 (s, 18H).

**$^{13}\text{C}\{^1\text{H}\}$  NMR (101 MHz,  $\text{CDCl}_3$ , rt):  $\delta$  [ppm]:** 148.95, 143.42, 142.88, 142.67, 142.36, 139.68, 138.95, 137.80, 136.91, 133.34, 133.20, 132.17, 131.42, 128.80, 127.77, 121.13, 120.61, 117.81, 101.68, 35.00, 31.65, 21.38, 21.34.

**UV/Vis ( $\text{CH}_2\text{Cl}_2$ ):  $\lambda$  [nm] ( $\epsilon$  [ $\text{M}^{-1}\text{cm}^{-1}$ ]):** 417 (180000), 531 (13000).

**HRMS (MALDI, DCTB) for  $\text{C}_{52}\text{H}_{51}\text{BrN}_4\text{Ni}$  ( $\text{M}^+$ ), calcd.:** 868.2645, found: 868.2879.

**TLC:  $R_f$  [%]:** 0.80 (hexanes/ $\text{CH}_2\text{Cl}_2$  3:1).

### **Fused Nickel-5,15-Dimesityl-10-(3,5-di-*tert*-butylphenyl)-20-Boronic-Ester-Porphyrin **5****

A 20 mL vial was filled with a solution of Nickel-5,15-Dimesityl-10-(3,5-di-*tert*-butylphenyl)-20-bromoporphyrin **3** (100 mg, 115  $\mu\text{mol}$ , 1 equiv) in  $\text{CH}_2\text{Cl}_2$  (20 mL) and cooled with an ice bath. The solution was degassed (bubbling  $\text{N}_2$  through the solution for 15 min). The  $\text{N}_2$  flow through the solution was increased, and a solution of dry  $\text{FeCl}_3$  (149 mg, 920  $\mu\text{mol}$ , 8 equiv) in  $\text{CH}_3\text{NO}_2$  (0.5 mL) was added. The  $\text{N}_2$  bubbling through the solution was stopped 15 min after  $\text{FeCl}_3$  was added, and the solution was stirred under slow warming to rt for 24 h. MeOH (10 mL) was added to quench the reaction. After adding  $\text{NEt}_3$  (1 mL), the solvent was removed, and the crude was purified by filtration through silica ( $\text{SiO}_2$ , hexanes/  $\text{CH}_2\text{Cl}_2$  - 1:1,  $\varnothing$  3 x 12 cm). The obtained dark-green solid was used in the next step without further purification. The porphyrin mixture **4** from the previous step,  $\text{PdCl}_2(\text{PPh}_3)_2$  (4.2 mg, 5.9  $\mu\text{mol}$ , 0.05 equiv.) and  $\text{NEt}_3$  (0.4 mL) were dissolved in dry 1,2 dichloroethane (10 mL) in a 20 mL microwave vial. The vial was sealed, and the reaction mixture was degassed before pinacolborane (142  $\mu\text{L}$ , 983  $\mu\text{mol}$ , 8.33 equiv) was added via a syringe. The reaction mixture was stirred for 18 h at 90  $^\circ\text{C}$  under the exclusion of light. The solvent was removed under reduced pressure, and the crude product was subjected to column chromatography ( $\text{SiO}_2$ , hexanes/ $\text{CH}_2\text{Cl}_2$  - 4:1  $\rightarrow$  2:1,  $\varnothing$  7 x 25 cm, 3<sup>rd</sup> band). **5** was obtained in 55% yield across the two reaction steps (58 mg, 63  $\mu\text{mol}$ ).

**$^1\text{H}$  NMR (400 MHz,  $\text{CD}_2\text{Cl}_2$ , rt):  $\delta$  [ppm]:** 9.27 (d,  $J$  = 4.9 Hz, 1H), 9.21 (d,  $J$  = 4.9 Hz, 1H), 9.12 (d,  $J$  = 5.0 Hz, 1H), 8.45 (d,  $J$  = 4.9 Hz, 1H), 8.26 (d,  $J$  = 4.9 Hz, 2H), 7.97

(d,  $J = 1.7$  Hz, 1H), 7.68 (s, 1H), 7.22 (d,  $J = 4.4$  Hz, 4H), 7.04 (d,  $J = 1.6$  Hz, 1H), 2.57 (s, 6H), 1.92 (s, 6H), 1.82 (s, 6H), 1.68 (s, 12H), 1.56 (s, 9H), 1.47 (s, 9H).

**$^{13}\text{C}\{^1\text{H}\}$  NMR (151 MHz,  $\text{CD}_2\text{Cl}_2$ , rt):  $\delta$  [ppm]:** 153.88, 153.02, 150.91, 148.84, 147.77, 147.65, 147.17, 146.54, 145.26, 144.71, 144.17, 140.40, 139.16, 138.94, 138.27, 138.18, 137.42, 135.91, 134.52, 133.74, 133.46, 132.32, 131.38, 130.59, 128.12, 127.39, 126.27, 123.45, 121.50, 121.15, 117.85, 113.96, 85.51, 35.51, 35.32, 31.17, 29.01, 25.30, 21.53, 21.49, 21.46, 21.33.

**UV/Vis ( $\text{CH}_2\text{Cl}_2$ ):  $\lambda$  [nm] ( $\epsilon$  [ $\text{M}^{-1}\text{cm}^{-1}$ ]):** 377 (39000), 437 (93000), 572 (9000), 620 (6000)

**HRMS (MALDI, DCTB) for  $\text{C}_{58}\text{H}_{61}\text{BN}_4\text{NiO}_2$  ( $\text{M}^+$ ), calcd.:** 914.4236, found: 914.4227.

**TLC:  $R_f$  [%] = 0.40** (hexanes/ $\text{CH}_2\text{Cl}_2$  2:1).



## 2.2 Synthesis of Phenyl-Fused Porphyrin-HBC Conjugates

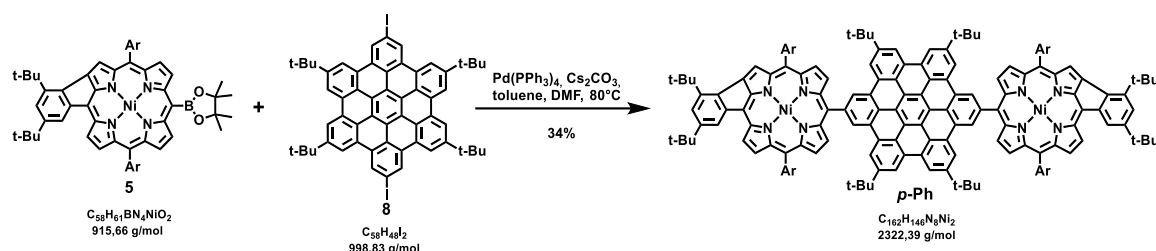

**Scheme S2.** Synthesis of *para*-Phenyl-Fused porphyrin **p-Ph**. Ar = mesityl.

Iodinated HBCs **6-9** were synthesized following the procedures given in [3].

### *para*-Phenyl-Fused-Porphyrin **p-Ph**

Fused nickel-5,15-dimesityl-10-(3,5-di-*tert*-butylphenyl)-20-boronic ester-porphyrin **5** (15 mg, 17 μmol, 2.1 equiv), *para*-I-HBC **8** (8 mg, 8 μmol, 1 equiv), Cs<sub>2</sub>CO<sub>3</sub> (9.8 mg, 24 μmol, 3 equiv) and Pd(PPh<sub>3</sub>)<sub>4</sub> (1.8 mg, 1.6 μmol, 0.2 equiv) were dissolved in toluene (2 mL) and DMF (1 mL) and were degassed. The reaction mixture was heated to 80 °C for 18 h. After cooling to rt, the solvent was removed under reduced pressure, and the crude was subjected to silica plug filtration (SiO<sub>2</sub>, hexanes/CH<sub>2</sub>Cl<sub>2</sub> - 1:1, Ø 3 x 12 cm) to remove the inorganics. The crude was further purified by size exclusion chromatography (Biobeads SX1, toluene, Ø 3 x 30 cm) followed by filtration through silica (SiO<sub>2</sub>, hexanes/CH<sub>2</sub>Cl<sub>2</sub> - 1:1, Ø 3 x 12 cm) to obtain **p-Ph** as a dark-green crystalline solid in 34% yield (6.4 mg, 2.8 μmol).

**<sup>1</sup>H NMR (601 MHz, CD<sub>2</sub>Cl<sub>2</sub>, rt):** δ [ppm]: 9.93 (s, 4H), 9.42 (d, *J* = 1.6 Hz, 4H), 9.35 (d, *J* = 1.6 Hz, 4H), 9.18 (d, *J* = 5.0 Hz, 2H), 8.58 (d, *J* = 4.8 Hz, 2H), 8.54 (d, *J* = 4.8 Hz, 2H), 8.52 (d, *J* = 4.8 Hz, 2H), 8.24 (d, *J* = 4.9 Hz, 2H), 8.20 (d, *J* = 4.8 Hz, 2H), 8.03 (d, *J* = 1.6 Hz, 2H), 7.77 (s, 2H), 7.22 (d, *J* = 8.3 Hz, 8H), 7.08 (d, *J* = 1.7 Hz, 2H), 2.53 (d, *J* = 3.3 Hz, 12H), 2.00 (s, 12H), 1.91 (s, 12H), 1.65 (s, 36H), 1.61 (s, 18H), 1.51 (s, 18H).

**<sup>13</sup>C{<sup>1</sup>H} NMR (151 MHz, CD<sub>2</sub>Cl<sub>2</sub>, rt):** δ [ppm]: 154.89, 153.24, 150.99, 150.27, 148.76, 147.99, 146.68, 146.06, 145.01, 144.66, 144.51, 141.31, 139.85, 139.13, 138.90, 138.36, 138.26, 135.82, 134.08, 133.85, 133.43, 131.78, 130.95, 130.88, 130.21, 130.02, 128.19, 128.17, 127.40, 126.94, 126.72, 124.57, 123.36, 122.84, 122.26,

121.56, 121.35, 121.04, 120.28, 120.06, 118.45, 113.20, 54.19, 54.01, 53.90, 31.96, 31.21, 29.02, 21.53, 21.48, 21.45, 21.39, 14.25, 1.13.

**UV/Vis (CH<sub>2</sub>Cl<sub>2</sub>):**  $\lambda$  [nm] ( $\epsilon$  [M<sup>-1</sup>cm<sup>-1</sup>]): 360 (120000), 453 (180000), 475 (180000), 572 (20000).

**HRMS (MALDI, DCTB)** for C<sub>182</sub>H<sub>148</sub>N<sub>8</sub>Ni<sub>2</sub> (M<sup>+</sup>), calcd.: 2319.0372, found: 2319.0335.

**TLC: R<sub>f</sub> [%]:** 0.40 (hexanes/CH<sub>2</sub>Cl<sub>2</sub> 4:1).

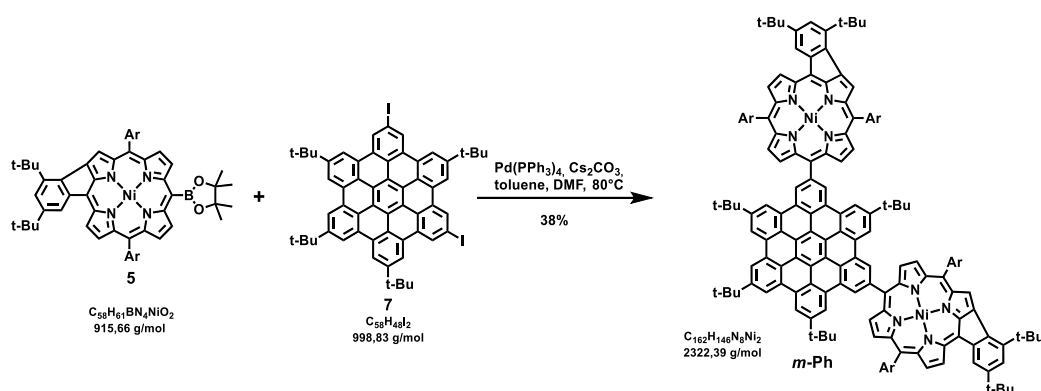

**Scheme S3.** Synthesis of *meta*-Phenyl-Fused porphyrin **m-Ph**. Ar = mesityl.

### *meta*-Phenyl-Fused-Porphyrin **m-Ph**

Fused nickel-5,15-dimesityl-10-(3,5-di-*tert*-butylphenyl)-20-boronic ester-porphyrin **5** (15 mg, 17  $\mu$ mol, 2.1 equiv), *meta*-I-HBC **7** (8 mg, 8  $\mu$ mol, 1 equiv), Cs<sub>2</sub>CO<sub>3</sub> (9.8 mg, 24  $\mu$ mol, 3 equiv) and Pd(PPh<sub>3</sub>)<sub>4</sub> (1.8 mg, 1.6  $\mu$ mol, 0.2 equiv) were dissolved in toluene (2 mL) and DMF (1 mL) and were degassed. The reaction mixture was heated to 80 °C for 18 h. After cooling to rt, the solvent was removed under reduced pressure, and the crude was subjected to silica plug filtration (SiO<sub>2</sub>, hexanes/CH<sub>2</sub>Cl<sub>2</sub> - 1:1,  $\varnothing$  3 x 12 cm) to remove the inorganics. The crude was further purified by size exclusion chromatography (Biobeads SX1, toluene,  $\varnothing$  3 x 30 cm) followed by filtration through silica (SiO<sub>2</sub>, hexanes/CH<sub>2</sub>Cl<sub>2</sub> - 1:1,  $\varnothing$  3 x 12 cm) to obtain **m-Ph** as a dark-green crystalline solid in 38% yield (7.1 mg, 3.1  $\mu$ mol).

**<sup>1</sup>H NMR (601 MHz, CD<sub>2</sub>Cl<sub>2</sub>, rt):**  $\delta$  [ppm]:  $\delta$  9.94 - 9.89 (m, 4H), 9.44 (m, 2H), 9.36 - 9.31 (m, 4H), 9.16 (d,  $J$  = 5.1 Hz, 2H), 8.57 (d,  $J$  = 4.9 Hz, 2H), 8.52 (d,  $J$  = 4.9 Hz, 2H), 8.51 (d,  $J$  = 4.9 Hz, 2H), 8.23 (d,  $J$  = 5.0 Hz, 2H), 8.19 (d,  $J$  = 4.9 Hz, 2H), 8.02

(d,  $J = 1.6$  Hz, 2H), 7.75 (s, 2H), 7.20 (m, 8H), 7.07 (d,  $J = 1.6$  Hz, 2H), 2.52 (m, 12H), 1.99 (m, 12H), 1.91 (m, 12H), 1.86 (s, 9H), 1.67 (s, 18H), 1.59 (s, 18H), 1.50 (s, 18H), 1.44 (s, 9H).

$^{13}\text{C}\{^1\text{H}\}$  NMR (151 MHz,  $\text{CD}_2\text{Cl}_2$ , rt):  $\delta$  [ppm]: 154.85, 153.21, 150.96, 150.41, 150.33, 150.09, 148.72, 147.96, 146.65, 146.02, 144.98, 144.63, 144.49, 141.28, 139.75, 139.11, 138.87, 138.33, 138.23, 137.33, 135.79, 134.05, 133.82, 133.41, 131.75, 130.97, 130.92, 130.90, 130.69, 130.61, 130.18, 129.95, 129.90, 128.16, 127.37, 126.96, 126.91, 126.69, 125.76, 124.87, 124.49, 124.23, 123.33, 122.81, 122.23, 121.82, 121.76, 121.33, 121.06, 121.01, 120.54, 120.22, 120.06, 119.76, 118.42, 113.17, 32.07, 31.97, 31.84, 31.20, 29.01.

UV/Vis ( $\text{CH}_2\text{Cl}_2$ ):  $\lambda$  [nm] ( $\epsilon$  [ $\text{M}^{-1}\text{cm}^{-1}$ ]): 360 (130000), 452 (190000), 475 (180000), 572 (20000)

HRMS (MALDI, DCTB) for  $\text{C}_{182}\text{H}_{148}\text{N}_8\text{Ni}_2$  ( $\text{M}^+$ ), calcd.: 2319.0372, found: 2319.0430.

TLC:  $R_f$  [%]: 0.40 (hexanes/ $\text{CH}_2\text{Cl}_2$  4:1).

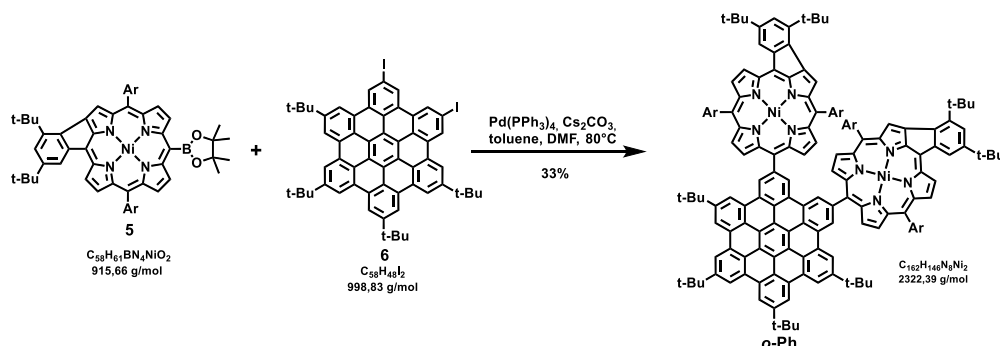

**Scheme S4.** Synthesis of *ortho*-Phenyl-Fused porphyrin **o-Ph**. Ar = mesityl.

### *ortho*-Phenyl-Fused-Porphyrin **o-Ph**

Fused nickel-5,15-dimesityl-10-(3,5-di-*tert*-butylphenyl)-20-boronic ester-porphyrin **5** (19 mg, 21  $\mu\text{mol}$ , 2.1 equiv), *ortho*-I-HBC **6** (10 mg, 10  $\mu\text{mol}$ , 1 equiv),  $\text{Cs}_2\text{CO}_3$  (9.8 mg, 24  $\mu\text{mol}$ , 3 equiv) and  $\text{Pd}(\text{PPh}_3)_4$  (1.8 mg, 1.6  $\mu\text{mol}$ , 0.2 equiv) were dissolved in toluene (2 mL) and DMF (1 mL) and were degassed. The reaction mixture was heated to  $80^\circ\text{C}$  for 18 h. After cooling to rt, the solvent was removed under reduced pressure and the crude was subjected to silica plug filtration ( $\text{SiO}_2$ , hexanes/ $\text{CH}_2\text{Cl}_2$  -

1:1, Ø 3 x 12 cm) to remove the inorganics. The crude was further purified by size exclusion chromatography (Biobeads SX1, toluene, Ø 3 x 30 cm) followed by filtration through silica (SiO<sub>2</sub>, hexanes/CH<sub>2</sub>Cl<sub>2</sub> - 1:1, Ø 3 x 12 cm) to obtain **o-Ph** as a dark-green crystalline solid in 33% yield (6.8 mg, 2.9 µmol).

**<sup>1</sup>H NMR (601 MHz, CD<sub>2</sub>Cl<sub>2</sub>, rt):** δ [ppm]: 9.91 (d, *J* = 1.4 Hz, 2H), 9.81 (d, *J* = 1.5 Hz, 2H), 9.47 - 9.42 (m, 6H), 9.33 (d, *J* = 1.7 Hz, 2H), 9.05 (d, *J* = 5.0 Hz, 2H), 8.49 (d, *J* = 4.9 Hz, 2H), 8.43 (d, *J* = 4.9 Hz, 2H), 8.40 (d, *J* = 4.9 Hz, 2H), 8.09 (d, *J* = 4.9 Hz, 2H), 8.06 (d, *J* = 4.9 Hz, 2H), 7.92 (d, *J* = 1.7 Hz, 2H), 7.63 (s, 2H), 7.17 - 7.13 (m, 4H), 7.08 (d, *J* = 6.2 Hz, 4H), 7.00 (d, *J* = 1.7 Hz, 2H), 2.49 (m, 12H), 1.92 (s, 6H), 1.88 (s, 18H), 1.82 (s, 6H), 1.72 (s, 6H), 1.66 (s, 18H), 1.62 (s, 6H), 1.52 (s, 18H), 1.44 (s, 18H).

**<sup>13</sup>C{<sup>1</sup>H} NMR (151 MHz, CD<sub>2</sub>Cl<sub>2</sub>, rt):** δ [ppm]: 154.74, 153.08, 150.87, 150.26, 150.18, 148.54, 147.82, 146.51, 145.86, 144.82, 144.47, 144.26, 144.25, 141.14, 139.80, 139.08, 138.98, 138.85, 138.75, 138.19, 138.09, 137.26, 135.72, 133.87, 133.57, 133.32, 131.50, 131.00, 130.93, 130.86, 130.61, 130.10, 129.99, 129.65, 128.04, 127.50, 127.39, 127.19, 126.53, 125.99, 124.56, 124.18, 123.22, 122.53, 122.07, 121.60, 121.54, 121.24, 120.90, 120.23, 120.10, 119.78, 119.72, 118.26, 113.00, 35.47, 35.30, 32.09, 31.95, 31.14, 30.05, 28.94, 21.44.

**UV/Vis (CH<sub>2</sub>Cl<sub>2</sub>):** λ [nm] (ε [M<sup>-1</sup>cm<sup>-1</sup>]): 367 (140000), 448 (160000), 472 (140000), 572 (16000).

**HRMS (MALDI, DCTB)** for C<sub>182</sub>H<sub>148</sub>N<sub>8</sub>Ni<sub>2</sub> (M<sup>+</sup>), calcd.: 2319.0372, found: 2319.0420.

**TLC: R<sub>f</sub> [%]:** 0.40 (hexanes/CH<sub>2</sub>Cl<sub>2</sub> 4:1).

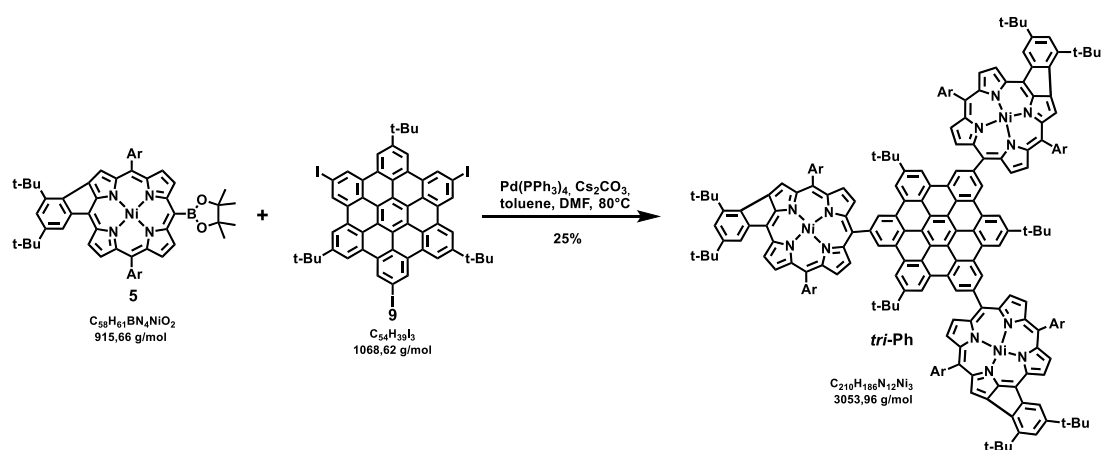

**Scheme S5.** Synthesis of *tri*-Phenyl-Fused porphyrin **tri-Ph**. Ar = mesityl.

### ***tri*-Phenyl-Fused-Porphyrin *tri*-Ph**

Fused nickel-5,15-dimesityl-10-(3,5-di-*tert*-butylphenyl)-20-boronic-ester porphyrin **5** (18.9 mg, 20.6  $\mu\text{mol}$ , 3.15 equiv), *tri*-I-HBC **9** (7.0 mg, 6.6  $\mu\text{mol}$ , 1 equiv),  $\text{Cs}_2\text{CO}_3$  (9.6 mg, 29.5  $\mu\text{mol}$ , 4.5 equiv) and  $\text{Pd}(\text{PPh}_3)_4$  (2.3 mg, 2.0  $\mu\text{mol}$ , 0.3 equiv) were dissolved in toluene (2 mL) and DMF (1 mL) and were degassed. The reaction mixture was heated to 80 °C for 18 h. After cooling to rt, the solvent was removed under reduced pressure, and the crude was subjected to silica plug filtration ( $\text{SiO}_2$ , hexanes/ $\text{CH}_2\text{Cl}_2$  - 1:1,  $\varnothing$  3 x 12 cm) to remove the inorganics. The crude was further purified by size exclusion chromatography (Biobeads SX1, toluene,  $\varnothing$  3 x 30 cm) followed by filtration through silica ( $\text{SiO}_2$ , hexanes/ $\text{CH}_2\text{Cl}_2$  - 1:1,  $\varnothing$  3 x 12 cm) to obtain *tri*-Ph as a dark-green crystalline solid in 25% yield (4.9 mg, 1.6  $\mu\text{mol}$ ).

**$^1\text{H}$  NMR (601 MHz,  $\text{CD}_2\text{Cl}_2$ , rt):  $\delta$  [ppm]:** 9.96 (s, 6H), 9.38 (s, 6H), 9.17 (d,  $J$  = 5.1 Hz, 3H), 8.60 (d,  $J$  = 5.0 Hz, 3H), 8.54 - 8.52 (m, 6H), 8.25 (d,  $J$  = 5.0 Hz, 3H), 8.21 (d,  $J$  = 4.9 Hz, 3H), 8.02 (d,  $J$  = 1.7 Hz, 3H), 7.76 (s, 3H), 7.25 - 7.18 (m, 12H), 7.07 (d,  $J$  = 1.6 Hz, 3H), 2.53 (m, 18H), 1.99 (s, 18H), 1.90 (s, 18H), 1.59 (s, 27H), 1.47 - 1.50 (m, 54H).

**$^{13}\text{C}\{^1\text{H}\}$  NMR (151 MHz,  $\text{CD}_2\text{Cl}_2$ , rt):  $\delta$  [ppm]:** 154.87, 153.22, 150.96, 150.65, 148.74, 147.97, 146.66, 146.04, 144.99, 144.65, 144.49, 144.48, 141.29, 139.91, 139.11, 138.88, 138.34, 138.24, 137.34, 135.80, 134.06, 133.83, 133.41, 131.75, 130.95, 130.76, 130.21, 130.00, 128.17, 127.38, 127.03, 126.70, 125.82, 124.87, 123.34, 122.75, 122.32, 122.25, 121.34, 121.02, 120.65, 118.44, 113.20, 31.86, 31.20, 29.01, 21.52, 21.38.

**UV/Vis ( $\text{CH}_2\text{Cl}_2$ ):  $\lambda$  [nm] ( $\epsilon$  [ $\text{M}^{-1}\text{cm}^{-1}$ ]):** 360 (152000), 454 (319000), 475 (317000), 572 (33000).

**HRMS (MALDI, DCTB) for  $\text{C}_{182}\text{H}_{148}\text{N}_8\text{Ni}_2$  ( $\text{M}^+$ ), calcd.:** 3049.2978, found: 3049.2933.

**TLC:  $R_f$  [%]:** 0.30 (hexanes/ $\text{CH}_2\text{Cl}_2$  3:1).

## 2.3 Synthesis of Trimesityl-Porphyrin Precursor

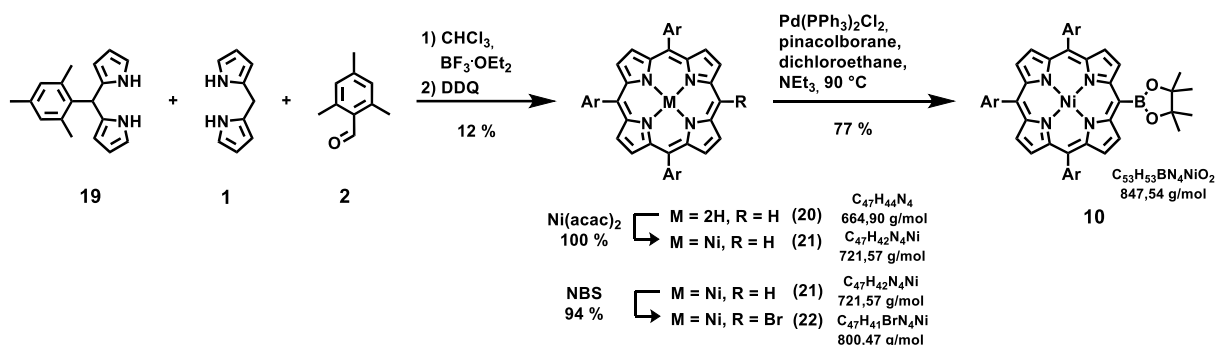

**Scheme S6.** Synthesis of Trimesityl-Porphyrin **10**. Ar = mesityl.

### Nickel-5,10,15-Trimesitylporphyrin **21**

Ethanol (2 mL) stabilized  $\text{CHCl}_3$  (775 mL) was degassed for 20 min (bubbling  $\text{N}_2$  through the solution). Dipyrromethane **1** (284 mg, 1.94 mmol, 1 equiv), mesitaldehyde **2** (572  $\mu\text{L}$ , 3.88 mmol, 2 equiv) and mesityl-dipyrrromethane **19\*** (513 mg, 1.94 mmol, 1 equiv) were added to the solution and the reaction was stirred for 5 min at rt.  $\text{BF}_3 \cdot \text{OEt}_2$  (316  $\mu\text{L}$ , 2.57 mmol, 0.66 equiv) was added, and the solution was stirred for 1 h at rt under the exclusion of light. DDQ (1.32 g, 5.81 mmol, 1.5 equiv) was added, and the mixture was stirred for a further 45 min. The acid was quenched via the addition of  $\text{NEt}_3$  (3.6 mL), and the solvent was removed. The crude was purified by column chromatography ( $\text{SiO}_2$ , hexanes/ $\text{CH}_2\text{Cl}_2$ , 3:1,  $\varnothing$  8 x 40 cm). The first isolated fraction contained both  $\text{A}_4$ -porphyrin and the target  $\text{A}_3\text{B}$  porphyrin, which were subsequently separated by a second column ( $\text{SiO}_2$ , hexanes/toluene, 3:1,  $\varnothing$  8 x 40 cm, 2<sup>nd</sup> band). The product **20** was obtained as a purple solid. Free-base porphyrin **20** (125 mg, 188  $\mu\text{mol}$ , 1 equiv) and  $\text{Ni(acac)}_2$  (241 mg, 940  $\mu\text{mol}$ , 5 equiv.) were dissolved in toluene (30 mL) and heated to reflux (heat-on temperature: 140  $^\circ\text{C}$ ) for 5 h. The solvent was removed under reduced pressure, the product was poured over a plug ( $\text{SiO}_2$ ,  $\text{CH}_2\text{Cl}_2$ ,  $\varnothing$  3 x 6 cm), and afterwards recryst. from  $\text{CH}_2\text{Cl}_2/\text{MeOH}$  yielding 12% of nickel-porphyrin **21** (136 mg, 188  $\mu\text{mol}$ ).

**<sup>1</sup>H NMR (400 MHz, CDCl<sub>3</sub>, rt):** δ [ppm]: 9.79 (s, 1H), 9.07 (d, *J* = 4.8 Hz, 2H), 8.69 (d, *J* = 4.7 Hz, 2H), 8.57 (s, 4H), 7.22 (m, 6H), 2.56 (m, 9H), 1.79 (s, 18H).

**<sup>13</sup>C NMR (101 MHz, CDCl<sub>3</sub>, rt):** δ [ppm]: 142.93, 142.74, 142.59, 142.37, 139.11, 139.08, 137.88, 137.63, 137.59, 137.52, 137.44, 132.17, 131.24, 131.21, 131.15, 129.04, 128.23, 127.72, 127.69, 125.30, 117.32, 116.81, 104.26, 21.48, 21.39.

**UV/Vis (CH<sub>2</sub>Cl<sub>2</sub>):** λ [nm] (ε [M<sup>-1</sup>cm<sup>-1</sup>]): 407 (250000), 521 (18000), 553 (5000).

**HRMS (MALDI, CH<sub>2</sub>Cl<sub>2</sub>)** for C<sub>47</sub>H<sub>42</sub>N<sub>4</sub>Ni (M<sup>+</sup>) calcd.: 720.2757, found: 720.2775.

**TLC: R<sub>f</sub> [%]:** 0.74 (hexanes/CH<sub>2</sub>Cl<sub>2</sub> - 2:1).

\*Synthesized adapting a procedure from the literature [4].

### **Nickel-(5-Bromo)-10,15,20-Trimesitylporphyrin 22**

To a solution of CHCl<sub>3</sub> (11 mL), pyridine (250 μL) and porphyrin **21** (130 mg, 180 μmol, 1 equiv) NBS (32 mg, 180 μmol, 1 equiv) in CHCl<sub>3</sub> (3 mL) was added slowly at rt. The mixture was stirred for 15 min at rt before the reaction was quenched with acetone (3 mL). The solvents were removed under reduced pressure, and the crude was purified by silica plug filtration (hexanes/CH<sub>2</sub>Cl<sub>2</sub> - 2:1, Ø 3 x 12 cm). The product **22** was obtained as a dark-orange solid in 94% yield (135 mg, 169 μmol).

**<sup>1</sup>H NMR (400 MHz, CDCl<sub>3</sub>, rt):** δ [ppm]: 9.46 (d, *J* = 5.0 Hz, 2H), 8.60 (d, *J* = 5.0 Hz, 2H), 8.48 (s, 4H), 7.19 - 7.17 (m, 6H), 2.55 (m, 9H), 1.79 (m, 18H).

**<sup>13</sup>C NMR (101 MHz, CDCl<sub>3</sub>, rt):** δ [ppm]: 143.04, 143.00, 142.76, 142.43, 139.00, 138.95, 137.80, 137.75, 136.94, 133.20, 132.03, 131.84, 131.80, 127.77, 117.71, 117.54, 101.91, 21.46, 21.37.

**UV/Vis (CH<sub>2</sub>Cl<sub>2</sub>):** λ [nm] (ε [M<sup>-1</sup>cm<sup>-1</sup>]): 415 (225000), 530 (17000).

**HRMS (MALDI, CH<sub>2</sub>Cl<sub>2</sub>)** for C<sub>47</sub>H<sub>41</sub>BrN<sub>4</sub>Ni (M<sup>+</sup>) calcd.: 798.1863, found: 798.1853.

**TLC: R<sub>f</sub> [%]:** 0.77 (hexanes/CH<sub>2</sub>Cl<sub>2</sub> - 2:1).

### **Boronic-Ester-Porphyrin 10**

Bromo-porphyrin **22** (135 mg, 169  $\mu\text{mol}$ , 1 equiv),  $\text{PdCl}_2(\text{PPh}_3)_2$  (6.0 mg, 8.5  $\mu\text{mol}$ , 0.05 equiv.) and  $\text{NEt}_3$  (0.5 mL) were dissolved in dry 1,2 dichloroethane (22 mL) in a 20 mL microwave vial. The vial was sealed, and the reaction mixture was degassed before pinacolborane (205  $\mu\text{L}$ , 180 mg, 1.41 mmol, 8.33 equiv) was added via syringe. The reaction mixture was stirred for 2.5 h at 90 °C under exclusion of light. The solvent was removed under reduced pressure, and the crude product was subjected to column chromatography ( $\text{SiO}_2$ , hexanes/ $\text{CH}_2\text{Cl}_2$  - 3:1,  $\varnothing$  5 x 25 cm). The 3rd isolated band contained the pure product **10** in 77% (110 mg, 130  $\mu\text{mol}$ ).

**$^1\text{H}$  NMR (400 MHz,  $\text{CDCl}_3$ , rt):  $\delta$  [ppm]:** 9.66 (d,  $J$  = 4.9 Hz, 2H), 8.65 (d,  $J$  = 4.8 Hz, 2H), 8.51 (d,  $J$  = 4.8 Hz, 2H), 8.48 (d,  $J$  = 4.8 Hz, 2H), 7.19 - 7.16 (m, 6H), 2.56 - 2.54 (m, 9H), 1.79 (m, 18H), 1.70 (s, 12H).

**$^{13}\text{C}$  NMR (101 MHz,  $\text{CDCl}_3$ , rt):  $\delta$  [ppm]:** 146.87, 142.79, 141.92, 141.71, 139.12, 139.03, 137.59, 137.54, 137.43, 137.29, 133.73, 131.84, 131.54, 130.84, 127.68, 118.19, 116.89, 25.21, 21.47, 21.42.

**UV/Vis ( $\text{CH}_2\text{Cl}_2$ ):  $\lambda$  [nm] ( $\epsilon$  [ $\text{M}^{-1}\text{cm}^{-1}$ ]):** 412 (240000), 528 (16000), 561 (7000).

**HRMS (MALDI,  $\text{CH}_2\text{Cl}_2$ ) for  $\text{C}_{53}\text{H}_{53}\text{BN}_4\text{NiO}_2$  ( $\text{M}^+$ ) calcd.:** 846.3615, found: 846.3601.

**TLC:  $R_f$  [%]:** 0.23 (hexanes/ $\text{CH}_2\text{Cl}_2$  - 2:1).



## 2.4 Synthesis of Trimesityl-Porphyrin-HBC Conjugates

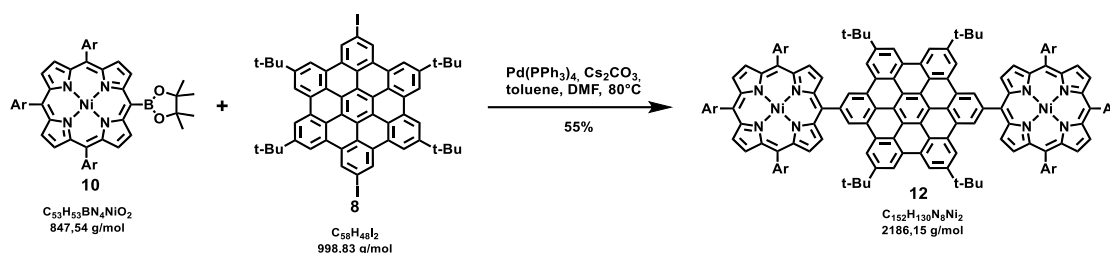

**Scheme S7.** Synthesis of *para*-bis-porphyrin-HBC **12**. Ar = mesityl.

### *para*-Bis-Porphyrin-HBC **12**

*para*-I-HBC **8** (21 mg, 21  $\mu$ mol, 1 equiv), boronic-ester-porphyrin **10** (37 mg, 44  $\mu$ mol, 2.1 equiv), Cs<sub>2</sub>CO<sub>3</sub> (21 mg, 63  $\mu$ mol, 3 equiv) and Pd(PPh<sub>3</sub>)<sub>4</sub> (4.9 mg, 4.2  $\mu$ mol, 0.2 equiv) were dissolved in toluene (2 mL) and DMF (1 mL) and were degassed. The reaction mixture was heated to 80 °C for 18 h. After cooling to rt, the solvent was removed under reduced pressure, and the crude was subjected to silica plug filtration (cyclohexane/CH<sub>2</sub>Cl<sub>2</sub> - 1:1,  $\emptyset$  3 x 12 cm). Further purification was achieved by size exclusion chromatography (Biobeads SX1, toluene,  $\emptyset$  3 x 30 cm, 1<sup>st</sup> band) followed by silica plug filtration (cyclohexane/CH<sub>2</sub>Cl<sub>2</sub> - 2:1,  $\emptyset$  3 x 10 cm). The pure product **12** was obtained in 55% yield (25 mg, 12  $\mu$ mol).

**<sup>1</sup>H NMR (400 MHz, CDCl<sub>3</sub>, rt):**  $\delta$  [ppm]: 9.96 (s, 4H), 9.36 (d,  $J$  = 2.0 Hz, 4H), 9.30 (d,  $J$  = 1.7 Hz, 4H), 8.95 (d,  $J$  = 4.8 Hz, 4H), 8.67 (d,  $J$  = 4.9 Hz, 4H), 8.62 (s, 8H), 7.24 - 7.19 (m, 12H), 2.62 (s, 6H), 2.57 (s, 12H), 1.94 - 1.93 (m, 36H), 1.68 (s, 36H).

**<sup>13</sup>C NMR (101 MHz, CDCl<sub>3</sub>, rt):**  $\delta$  [ppm]: 149.12, 143.14, 142.45, 142.33, 139.67, 138.76, 138.73, 137.41, 137.17, 137.14, 132.76, 131.34, 131.15, 130.53, 130.28, 129.33, 127.77, 126.65, 125.28, 124.36, 123.15, 121.19, 121.00, 119.65, 119.35, 118.51, 117.24, 116.93, 35.39, 31.71, 31.23, 21.45, 21.40.

**UV/Vis (CH<sub>2</sub>Cl<sub>2</sub>):**  $\lambda$  [nm] ( $\epsilon$  [M<sup>-1</sup>cm<sup>-1</sup>]): 357 (105000), 427 (393000), 528 (42800).

**HRMS (MALDI, CH<sub>2</sub>Cl<sub>2</sub>)** for C<sub>152</sub>H<sub>130</sub>N<sub>8</sub>Ni<sub>2</sub> (M<sup>+</sup>) calcd.: 2182.9120, found: 2182.9134.

**TLC: R<sub>f</sub> [%]:** 0.80 (hexanes/CH<sub>2</sub>Cl<sub>2</sub> - 2:1).

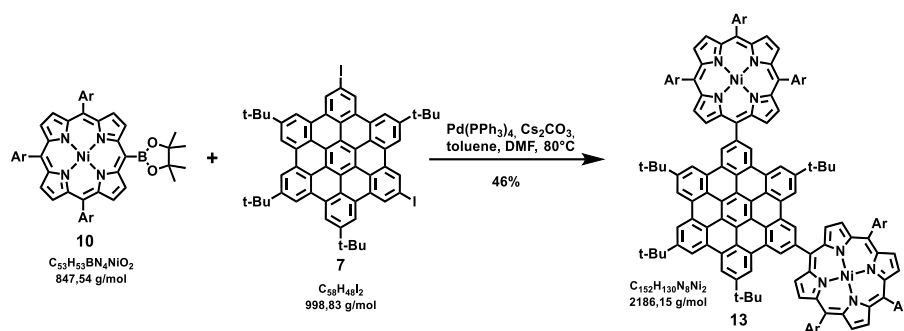

**Scheme S8.** Synthesis of *meta*-bis-porphyrin-HBC **13**. Ar = mesityl.

### *meta*-Bis-Porphyrin-HBC **13**

*meta*-I-HBC **7** (20 mg, 20 μmol, 1 equiv), boronic-ester-porphyrin **10** (36 mg, 42 μmol, 2.1 equiv), Cs<sub>2</sub>CO<sub>3</sub> (20 mg, 60 μmol, 3 equiv) and Pd(PPh<sub>3</sub>)<sub>4</sub> (4.6 mg, 4.0 μmol, 0.2 equiv) were dissolved in toluene (2 mL) and DMF (1 mL) and were degassed. The reaction mixture was heated to 80 °C for 18 h. After cooling to rt, the solvent was removed under reduced pressure, and the crude was subjected to silica plug filtration (cyclohexane/CH<sub>2</sub>Cl<sub>2</sub> - 1:1, Ø 3 x 12 cm). Further purification was achieved by size exclusion chromatography (Biobeads SX1, toluene, Ø 3 x 30 cm, 1<sup>st</sup> band) followed by silica plug filtration (cyclohexane/CH<sub>2</sub>Cl<sub>2</sub> - 2:1, Ø 3 x 10 cm). The pure product **13** was obtained in 46% yield (20 mg, 9.3 μmol).

**<sup>1</sup>H NMR (400 MHz, CDCl<sub>3</sub>, rt):** δ [ppm]: 9.99 (m, 4H), 9.40 (m, 4H), 9.35 - 9.27 (m, 4H), 8.96 (d, *J* = 5.0 Hz, 4H), 8.67 (d, *J* = 4.9 Hz, 4H), 8.60 (s, 8H), 7.21 (m, 12H), 2.56 (m, 18H), 1.88 (m, 36H).

**<sup>13</sup>C NMR (101 MHz, CDCl<sub>3</sub>, rt):** δ [ppm]: 149.70, 143.17, 142.71, 142.61, 139.67, 139.11, 139.08, 137.70, 137.28, 132.91, 131.66, 131.44, 130.69, 130.49, 130.42, 129.47, 127.80, 125.51, 124.45, 121.57, 120.86, 118.53, 117.43, 117.08, 32.08, 31.96, 31.82, 21.60, 21.49, 21.41.

**UV/Vis (CH<sub>2</sub>Cl<sub>2</sub>):** λ [nm] (ε [M<sup>-1</sup>cm<sup>-1</sup>]): 419 (410000), 529 (50000).

**HRMS (MALDI, CH<sub>2</sub>Cl<sub>2</sub>)** for C<sub>152</sub>H<sub>130</sub>N<sub>8</sub>Ni<sub>2</sub> (M<sup>+</sup>) calcd.: 2182.9120, found: 2182.9111.

**TLC: R<sub>f</sub> [%]:** 0.50 (hexanes/CH<sub>2</sub>Cl<sub>2</sub> - 3:1).

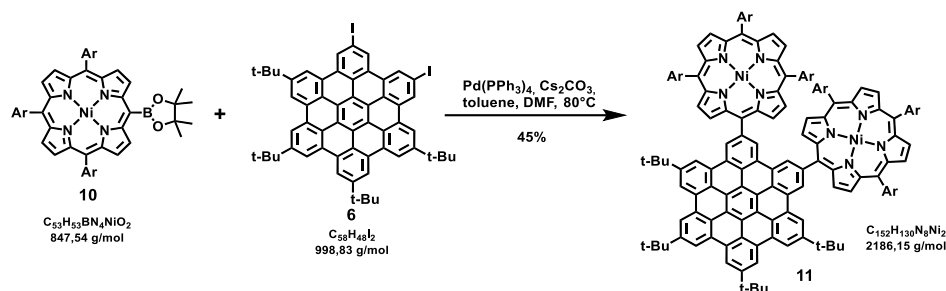

**Scheme S9.** Synthesis of *ortho*-bis-porphyrin-HBC **13**. Ar = mesityl.

### *ortho*-Bis-Porphyrin-HBC **11**

*ortho*-I-HBC **6** (21 mg, 21  $\mu\text{mol}$ , 1 equiv), boronic-ester-porphyrin **10** (37 mg, 44  $\mu\text{mol}$ , 2.1 equiv),  $\text{Cs}_2\text{CO}_3$  (21 mg, 63  $\mu\text{mol}$ , 3 equiv) and  $\text{Pd}(\text{PPh}_3)_4$  (4.9 mg, 4.2  $\mu\text{mol}$ , 0.2 equiv) were dissolved in toluene (2 mL) and DMF (1 mL) and were degassed. The reaction mixture was heated to 80  $^\circ\text{C}$  for 18 h. After cooling to rt, the solvent was removed under reduced pressure and the crude was subjected to silica plug filtration (cyclohexane/ $\text{CH}_2\text{Cl}_2$  - 1:1,  $\varnothing$  3 x 12 cm). Further purification was achieved by size exclusion chromatography (Biobeads SX1, toluene,  $\varnothing$  3 x 30 cm, 1<sup>st</sup> band) followed by silica plug filtration ( $\text{SiO}_2$ , cyclohexane/ $\text{CH}_2\text{Cl}_2$  - 3:1,  $\varnothing$  3 x 12 cm). The pure product **11** was obtained in 45% yield (21 mg, 9.5  $\mu\text{mol}$ ).

**$^1\text{H}$  NMR (400 MHz,  $\text{CDCl}_3$ , rt):**  $\delta$  [ppm]: 9.91 (s, 4H), 9.41 - 9.33 (m, 6H), 9.25 (d,  $J = 1.7$  Hz, 2H), 8.84 (d,  $J = 4.8$  Hz, 4H), 8.48 (d,  $J = 5.0$  Hz, 4H), 8.45 (s, 8H), 7.14 - 7.10 (m, 8H), 7.04 (s, 4H), 2.53 - 2.50 (m, 18H), 1.89 (s, 18H), 1.84 (s, 12H), 1.78 (s, 6H), 1.71 (s, 6H), 1.64 (s, 18H), 1.58 (s, 12H).

**$^{13}\text{C}$  NMR (101 MHz,  $\text{CDCl}_3$ , rt):**  $\delta$  [ppm]: 142.95, 142.25, 142.13, 142.11, 138.72, 137.32, 137.25, 137.14, 137.09, 132.56, 131.13, 131.04, 130.66, 130.58, 129.31, 127.64, 127.62, 127.22, 127.19, 125.65, 125.12, 124.74, 124.37, 123.97, 123.84, 121.19, 121.01, 119.40, 119.04, 118.28, 117.02, 116.69, 35.43, 31.90, 31.73, 27.05, 21.34, 21.19.

**UV/Vis ( $\text{CH}_2\text{Cl}_2$ ):**  $\lambda$  [nm] ( $\epsilon$  [ $\text{M}^{-1}\text{cm}^{-1}$ ]): 358 (90000), 417 (365000), 528 (35000).

**HRMS (MALDI,  $\text{CH}_2\text{Cl}_2$ )** for  $\text{C}_{152}\text{H}_{130}\text{N}_8\text{Ni}_2$  ( $\text{M}^+$ ) calcd.: 2182.9120, found: 2182.9085.

**TLC:  $R_f$  [%]:** 0.80 (hexanes/ $\text{CH}_2\text{Cl}_2$  - 2:1).

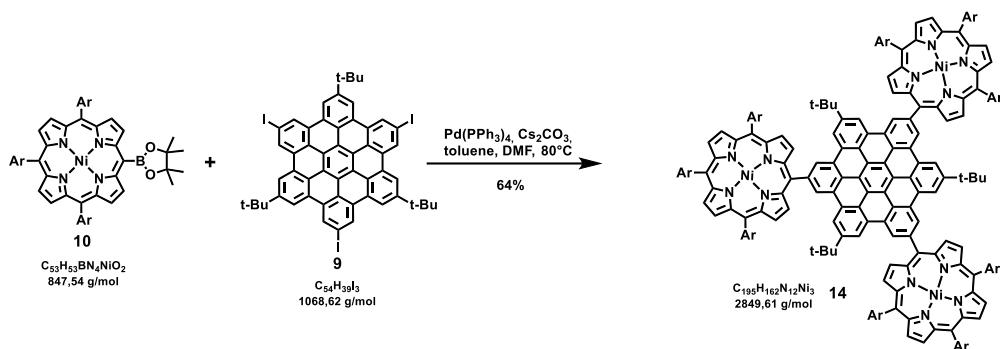

**Scheme S10.** Synthesis of Tris-porphyrin-HBC **13**. Ar = mesityl.

### Tris-Porphyrin-HBC **14**

Tris-I-HBC **9** (20 mg, 19  $\mu\text{mol}$ , 1 equiv), boronic-ester-porphyrin **10** (50 mg, 59  $\mu\text{mol}$ , 3.15 equiv),  $\text{Cs}_2\text{CO}_3$  (27 mg, 84  $\mu\text{mol}$ , 4.5 equiv) and  $\text{Pd}(\text{PPh}_3)_4$  (6.5 mg, 5.6  $\mu\text{mol}$ , 0.3 equiv) were dissolved in toluene (2 mL) and DMF (1 mL) and were degassed. The reaction mixture was heated to  $80^\circ\text{C}$  for 18 h. After cooling to rt, the solvent was removed under reduced pressure, and the crude was subjected to silica plug filtration (cyclohexane/ $\text{CH}_2\text{Cl}_2$  - 1:1,  $\varnothing$  3 x 12 cm). Further purification was achieved by size exclusion chromatography (bio-beads SX1, toluene,  $\varnothing$  3 x 30 cm, 1<sup>st</sup> band) followed by silica plug filtration (cyclohexane/ $\text{CH}_2\text{Cl}_2$  - 2:1,  $\varnothing$  3 x 10 cm). The pure product **14** was obtained in 64% yield (34 mg, 12  $\mu\text{mol}$ ).

**$^1\text{H}$  NMR (400 MHz,  $\text{CDCl}_3$ , rt):**  $\delta$  [ppm]: 10.02 (s, 6H), 9.33 (s, 6H), 8.98 (d,  $J = 4.9$  Hz, 6H), 8.67 (d,  $J = 5.0$  Hz, 6H), 8.59 (s, 12H), 7.24 - 7.14 (m, 18H), 2.55 (m, 27H), 1.87 (m, 54H),

**$^{13}\text{C}$  NMR (101 MHz,  $\text{CDCl}_3$ , rt):**  $\delta$  [ppm]: 143.16, 142.62, 139.08, 137.70, 131.67, 131.47, 130.57, 127.79, 117.43, 31.83, 21.58, 21.48, 21.40.

**UV/Vis ( $\text{CH}_2\text{Cl}_2$ ):**  $\lambda$  [nm] ( $\epsilon$  [ $\text{M}^{-1}\text{cm}^{-1}$ ]): 418 (610000), 528 (72000).

**HRMS (MALDI,  $\text{CH}_2\text{Cl}_2$ )** for  $\text{C}_{152}\text{H}_{130}\text{N}_8\text{Ni}_2$  ( $\text{M}^+$ ) calcd.: 2845.1100, found: 2845.1126.

**TLC:  $R_f$  [%]:** 0.25 (hexanes/ $\text{CH}_2\text{Cl}_2$  - 3:1).

## 2.5 Synthesis of HBC-Fused Porphyrin Conjugates

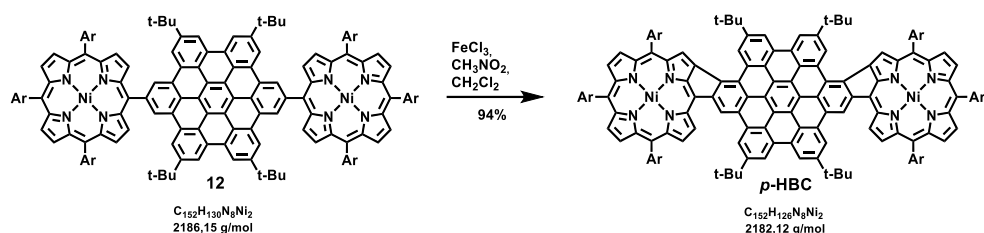

**Scheme S11.** Synthesis of fused *para*-bis-porphyrin-HBC *p*-HBC. Ar = mesityl.

### Fused *para*-Bis-Porphyrin-HBC *p*-HBC

A 20 mL vial was filled with a solution of *para*-bis-porphyrin-HBC **12** (20 mg, 9.2  $\mu$ mol, 1 equiv) in CH<sub>2</sub>Cl<sub>2</sub> (10 mL) and cooled with an ice bath. The solution was degassed (bubbling N<sub>2</sub> through the solution for 15 min). The N<sub>2</sub> flow through the solution was increased and a solution of dry FeCl<sub>3</sub> (89 mg, 549  $\mu$ mol, 60 equiv) in CH<sub>3</sub>NO<sub>2</sub> (0.5 mL) was added. The N<sub>2</sub> bubbling through the solution was stopped 15 min after FeCl<sub>3</sub> was added and the solution was stirred under slow warming to rt for 24 h. MeOH (10 mL) was added to quench the reaction. After adding NEt<sub>3</sub> (1 mL) the solvent was removed and the crude was purified by a silica plug (hexanes/ CH<sub>2</sub>Cl<sub>2</sub> - 1:1,  $\varnothing$  3 x 8 cm). The product *p*-HBC was obtained as a purple-black solid in 94% yield (19 mg, 8.55  $\mu$ mol).

**<sup>1</sup>H NMR (500 MHz, CD<sub>2</sub>Cl<sub>2</sub>, rt):**  $\delta$  [ppm]: 9.86 (m, 4H), 9.61 (d,  $J$  = 5.0 Hz, 2H), 9.44 (s, 2H), 9.38 (s, 2H), 9.27 (s, 2H), 8.66 (d,  $J$  = 4.8 Hz, 2H), 8.48 (s, 2H), 8.25 - 8.15 (m, 6H), 8.13 (d,  $J$  = 4.8 Hz, 2H), 7.27 (s, 4H), 7.24 (s, 4H), 7.20 (s, 4H), 2.63 - 2.43 (m, 18H), 2.07 - 1.79 (m, 54H), 1.61 (s, 18H).

**<sup>13</sup>C NMR (126 MHz, CD<sub>2</sub>Cl<sub>2</sub>, rt):**  $\delta$  [ppm]: 156.15, 150.15, 149.87, 149.55, 148.67, 146.61, 146.24, 145.33, 144.72, 144.39, 144.28, 141.72, 139.23, 138.99, 138.79, 138.42, 138.34, 138.26, 137.45, 137.12, 135.98, 134.46, 133.66, 132.26, 131.65, 131.33, 131.11, 131.09, 130.79, 130.67, 130.62, 130.30, 130.16, 128.69, 128.37, 128.20, 128.16, 126.99, 124.91, 124.19, 124.04, 123.07, 122.67, 121.79, 121.60, 121.49, 121.43, 120.97, 119.83, 119.58, 119.33, 118.74, 112.47, 32.39, 32.15, 21.64, 21.50, 21.44, 21.43, 21.29.

**UV/Vis (CH<sub>2</sub>Cl<sub>2</sub>):**  $\lambda$  [nm] ( $\epsilon$  [M<sup>-1</sup>cm<sup>-1</sup>]): 381 (100000), 441 (110000), 523 (145000), 544 (160000), 596 (50000), 641 (30000), 700 (10000).

**HRMS (MALDI, CH<sub>2</sub>Cl<sub>2</sub>)** for C<sub>152</sub>H<sub>126</sub>N<sub>8</sub>Ni<sub>2</sub> (M<sup>+</sup>) calcd.: 2178.8807, found: 2178.8811.

**TLC: R<sub>f</sub> [%]:** 0.68 (hexanes/CH<sub>2</sub>Cl<sub>2</sub> - 2:1).

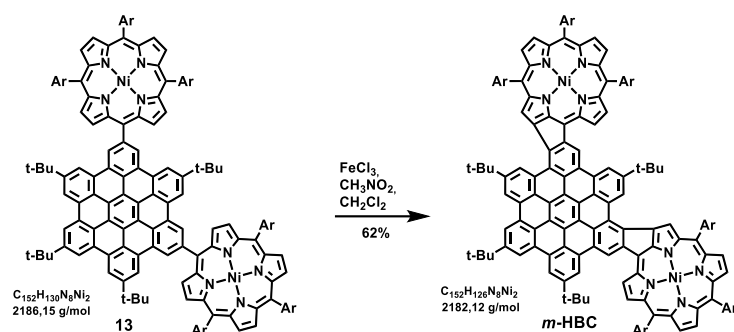

**Scheme S12.** Synthesis of fused *meta*-bis-porphyrin-HBC ***m*-HBC**. Ar = mesityl.

### Fused *meta*-Bis-Porphyrin-HBC ***m*-HBC**

A 20 mL vial was filled with a solution of *meta*-bis-porphyrin-HBC **13** (12 mg, 5.5  $\mu$ mol, 1 equiv) in CH<sub>2</sub>Cl<sub>2</sub> (8 mL) and cooled with an ice bath. The solution was degassed (bubbling N<sub>2</sub> through the solution for 15 min). The N<sub>2</sub> flow through the solution was increased and a solution of dry FeCl<sub>3</sub> (53 mg, 329  $\mu$ mol, 60 equiv) in CH<sub>3</sub>NO<sub>2</sub> (0.3 mL) was added. The N<sub>2</sub> bubbling through the solution was stopped 15 min after FeCl<sub>3</sub> was added and the solution was stirred under slow warming to rt for 72 h. MeOH (10 mL) was added to quench the reaction. After adding NEt<sub>3</sub> (1 mL) the solvent was removed and the crude was purified by a silica plug (hexanes/ CH<sub>2</sub>Cl<sub>2</sub> - 1:1,  $\varnothing$  3 x 8 cm). Further purification was achieved by column chromatography (SiO<sub>2</sub>, hexanes/CH<sub>2</sub>Cl<sub>2</sub> - 4:1,  $\varnothing$  7 x 40 cm) The product ***m*-HBC** was obtained as a purple-black solid in 62% yield (7.4 mg, 3.41  $\mu$ mol).

**<sup>1</sup>H NMR (600 MHz, CD<sub>2</sub>Cl<sub>2</sub>, rt):**  $\delta$  [ppm]: 9.89 - 9.78 (m, 5H), 9.62 - 9.60 (m, 2H), 9.43 (s, 1H), 9.39 - 9.34 (m, 3H), 9.29 (s, 1H), 9.25 (s, 1H), 8.68 (d,  $J$  = 4.7 Hz, 1H), 8.66 (d,  $J$  = 4.8 Hz, 1H), 8.49 - 8.46 (m, 2H), 8.21 - 8.16 (m, 5H), 8.13 - 8.12 (m, 2H), 7.31 (s, 2H), 7.27 (s, 2H), 7.24 - 7.23 (m, 4H), 7.20 (m, 4H), 2.67 - 2.49 (m, 18H), 2.01 - 1.85 (m, 45H), 1.65 (s, 9H), 1.59 (s, 9H), 1.55 (s, 9H).

**$^{13}\text{C}$  NMR (151 MHz,  $\text{CD}_2\text{Cl}_2$ , rt):  $\delta$  [ppm]:** 156.14, 156.10, 150.18, 150.07, 149.84, 149.76, 149.53, 149.48, 148.70, 148.63, 146.61, 146.57, 146.23, 146.21, 145.31, 144.71, 144.69, 144.36, 144.25, 141.73, 141.69, 139.23, 139.20, 138.97, 138.76, 138.43, 138.39, 138.34, 138.31, 138.23, 137.44, 137.42, 137.09, 135.93, 134.42, 133.71, 133.63, 132.25, 132.23, 131.63, 131.45, 131.30, 131.06, 130.97, 130.89, 130.77, 130.74, 130.63, 130.60, 130.53, 130.28, 130.17, 128.68, 128.66, 128.32, 128.20, 128.18, 128.13, 128.07, 127.02, 126.97, 125.09, 125.06, 124.10, 124.07, 124.00, 123.98, 123.31, 123.12, 122.67, 122.66, 121.89, 121.72, 121.52, 121.49, 121.46, 121.42, 121.36, 121.33, 121.21, 119.84, 119.78, 119.50, 119.46, 119.31, 119.21, 118.71, 118.70, 112.42, 54.16, 32.44, 32.35, 32.29, 32.13, 32.07, 30.05, 30.01, 23.06, 21.62, 21.52, 21.50, 21.49, 21.47, 21.44, 21.44, 21.42, 21.29.

**UV/Vis ( $\text{CH}_2\text{Cl}_2$ ):  $\lambda$  [nm] ( $\epsilon$  [ $\text{M}^{-1}\text{cm}^{-1}$ ]):** 392 (55000), 448 (70000), 506 (80000), 594 (27000), 639 (17000), 693 (5000).

**HRMS (MALDI,  $\text{CH}_2\text{Cl}_2$ ) for  $\text{C}_{152}\text{H}_{126}\text{N}_8\text{Ni}_2$  ( $\text{M}^+$ )** calcd.: 2178.8807, found: 2178.8815.

**TLC:  $R_f$  [%]:** 0.30 (hexanes/ $\text{CH}_2\text{Cl}_2$  - 4:1).

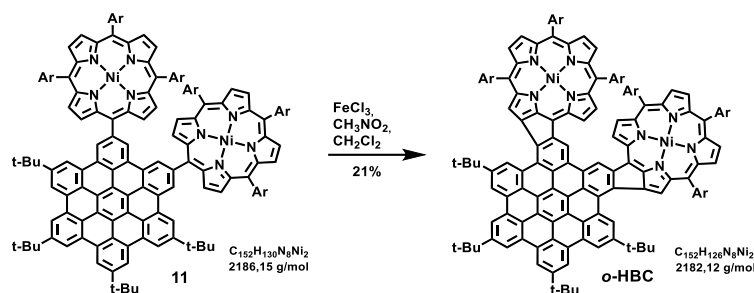

**Scheme S13.** Synthesis of fused *ortho*-bis-porphyrin-HBC **o-HBC**. Ar = mesityl.

### Fused *ortho*-Bis-Porphyrin-HBC **o-HBC**

A 20 mL vial was filled with a solution of *ortho*-bis-porphyrin-HBC **11** (20 mg, 9.2  $\mu\text{mol}$ , 1 equiv) in  $\text{CH}_2\text{Cl}_2$  (10 mL) and cooled with an ice bath. The solution was degassed (bubbling  $\text{N}_2$  through the solution for 15 min). The  $\text{N}_2$  flow through the solution was increased, and a solution of dry  $\text{FeCl}_3$  (89 mg, 549  $\mu\text{mol}$ , 60 equiv) in  $\text{CH}_3\text{NO}_2$  (0.3 mL) was added. The  $\text{N}_2$  bubbling through the solution was stopped 15 min after  $\text{FeCl}_3$  was

added and the solution was stirred under slow warming to rt for 148 h. MeOH (10 mL) was added to quench the reaction. After adding NEt<sub>3</sub> (1 mL), the solvent was removed, and the crude was purified by a silica plug (hexanes/ CH<sub>2</sub>Cl<sub>2</sub> - 1:1, Ø 3 x 8 cm). Further purification was achieved by column chromatography (SiO<sub>2</sub>, hexanes/CH<sub>2</sub>Cl<sub>2</sub> - 3:1, Ø 7 x 40 cm). The product **o-HBC** was obtained as a purple-black solid in 21% yield (4.2 mg, 1.9 µmol).

**<sup>1</sup>H NMR (601 MHz, CD<sub>2</sub>Cl<sub>2</sub>/CS<sub>2</sub>, rt):** δ [ppm]: 9.81 (s, 2H), 9.76 (s, 2H), 9.74 (d, *J* = 4.8 Hz, 2H), 9.25 (s, 2H), 9.21 (s, 2H), 9.18 (s, 2H), 8.81 (d, *J* = 4.7 Hz, 2H), 8.39 (s, 2H), 8.19 (s, 4H), 8.17 (d, *J* = 4.6 Hz, 2H), 8.12 (d, *J* = 4.6 Hz, 2H), 7.31 (s, 4H), 7.22 (s, 4H), 7.18 (s, 4H), 2.73 (s, 6H), 2.64 (s, 6H), 2.60 (s, 6H), 2.06 (s, 12H), 2.03 (s, 12H), 1.96 (s, 12H), 1.92 (s, 18H), 1.63 (s, 18H).

**<sup>13</sup>C NMR (151 MHz, CD<sub>2</sub>Cl<sub>2</sub>/CS<sub>2</sub>, rt):** δ [ppm]: 156.60, 149.92, 149.31, 148.82, 148.68, 146.55, 146.05, 145.12, 144.65, 144.17, 144.09, 142.06, 139.22, 138.91, 138.79, 138.08, 138.02, 137.74, 137.28, 136.18, 134.49, 133.80, 132.18, 131.68, 131.38, 131.24, 131.21, 131.09, 130.98, 130.70, 130.68, 130.35, 128.86, 128.79, 128.68, 128.53, 127.21, 125.42, 124.30, 123.62, 123.24, 122.38, 122.01, 121.68, 121.59, 121.36, 121.35, 119.61, 119.55, 119.44, 118.78, 113.19, 32.66, 32.49, 30.64, 22.24, 22.15, 22.14, 22.12, 21.86.

**UV/Vis (CH<sub>2</sub>Cl<sub>2</sub>):** λ [nm] (ε [M<sup>-1</sup>cm<sup>-1</sup>]): 387 (49000), 452 (61000), 484 (72000), 561 (43000), 707 (4000).

**MS (MALDI, DCTB):** *m/z* (rel. Int.) = 2182 (M<sup>+</sup>, 100 %).

**HRMS (MALDI, CH<sub>2</sub>Cl<sub>2</sub>)** for C<sub>152</sub>H<sub>126</sub>N<sub>8</sub>Ni<sub>2</sub> (M<sup>+</sup>) calcd.: 2178.8807, found: 2178.8821.

**TLC: R<sub>f</sub> [%]:** 0.30 (hexanes/CH<sub>2</sub>Cl<sub>2</sub> - 4:1).



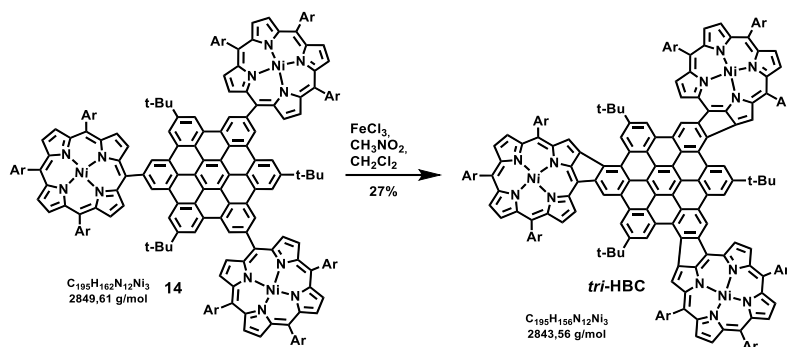

**Scheme S13.** Synthesis of fused tris-porphyrin-HBC **tri-HBC**. Ar = mesityl.

### Fused Tris-Porphyrin-HBC **tri-HBC**

A 20 mL vial was filled with a solution of tris-porphyrin-HBC **14** (20 mg, 7.0  $\mu\text{mol}$ , 1 equiv) in  $\text{CH}_2\text{Cl}_2$  (10 mL) and cooled with an ice bath. The solution was degassed (bubbling  $\text{N}_2$  through the solution for 15 min). The  $\text{N}_2$  flow through the solution was increased, and a solution of dry  $\text{FeCl}_3$  (68 mg, 421  $\mu\text{mol}$ , 60 equiv) in  $\text{CH}_3\text{NO}_2$  (0.2 mL) was added. The  $\text{N}_2$  bubbling through the solution was stopped 15 min after  $\text{FeCl}_3$  was added and the solution was stirred under slow warming to rt for 72 h. MeOH (10 mL) was added to quench the reaction. After adding  $\text{NEt}_3$  (1 mL) the solvent was removed and the crude was purified by a silica plug (hexanes/  $\text{CH}_2\text{Cl}_2$  - 1:1,  $\text{Ø}$  3 x 8 cm). Further purification was achieved by column chromatography ( $\text{SiO}_2$ , hexanes/ $\text{CH}_2\text{Cl}_2$  - 3:1,  $\text{Ø}$  7 x 40 cm). The product **tri-HBC** was obtained as a purple-black solid in 27% yield (4.6 mg, 1.6  $\mu\text{mol}$ ).

**$^1\text{H}$  NMR (601 MHz,  $\text{CD}_2\text{Cl}_2$ , rt):**  $\delta$  [ppm]: 9.88 (s, 3H), 9.81 (s, 3H), 9.63 - 9.62 (m, 3H), 9.38 (s, 3H), 8.69 - 8.69 (m, 3H), 8.51 (s, 3H), 8.22 - 8.20 (m, 6H), 8.19 (d,  $J$  = 4.6 Hz, 3H), 8.13 (d,  $J$  = 4.6 Hz, 3H), 7.30 (m, 6H), 7.25 (s, 6H), 7.21 (m, 6H), 2.63 - 2.55 (m, 18H), 2.55 (s, 9H), 2.00 (s, 18H), 1.95 (s, 18H), 1.90 (s, 18H), 1.64 (s, 27H).

**$^{13}\text{C}$  NMR (151 MHz,  $\text{CD}_2\text{Cl}_2$ , rt):**  $\delta$  [ppm]: 156.09, 149.91, 149.75, 148.60, 146.59, 146.25, 145.33, 144.73, 144.39, 144.28, 141.74, 139.23, 138.97, 138.78, 138.44, 138.35, 138.24, 137.44, 137.09, 135.93, 134.44, 133.71, 132.27, 131.57, 131.32, 131.08, 130.83, 130.81, 130.34, 130.31, 128.70, 128.20, 128.14, 127.02, 125.07, 124.05, 123.38, 122.71, 121.92, 121.74, 121.51, 121.47, 121.45, 119.32, 112.36, 32.45, 23.06, 21.64, 21.52, 21.51, 21.45, 21.30.

**UV/Vis (CH<sub>2</sub>Cl<sub>2</sub>):**  $\lambda$  [nm] ( $\epsilon$  [M<sup>-1</sup>cm<sup>-1</sup>]): 400 (63000), 458 (74000), 519 (87000), 554 (76000), 643 (24000).

**HRMS (MALDI, CH<sub>2</sub>Cl<sub>2</sub>)** for C<sub>152</sub>H<sub>126</sub>N<sub>8</sub>Ni<sub>2</sub> (M<sup>+</sup>) calcd.: 2839.0631, found: 2839.0737.

**TLC: R<sub>f</sub> [%]:** 0.30 (hexanes/CH<sub>2</sub>Cl<sub>2</sub> - 2:1).

### 3 Spectral Appendix

$^1\text{H}$  NMR (400 MHz,  $\text{CD}_2\text{Cl}_2$ , rt)

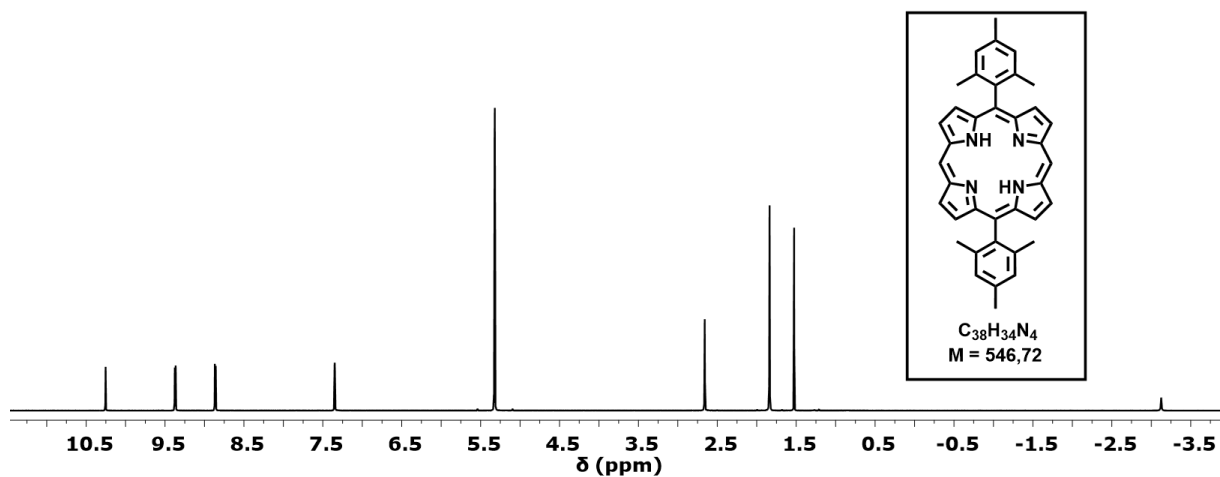

$^{13}\text{C}$  NMR (101 MHz,  $\text{CD}_2\text{Cl}_2$ , rt)

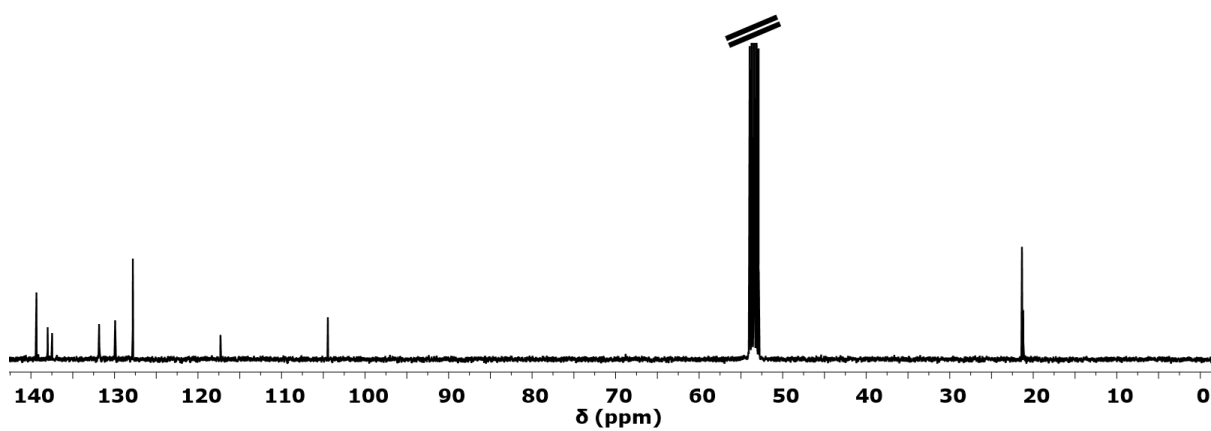

Figure S1.  $^1\text{H}$  and  $^{13}\text{C}$  NMR of 15.

## MS (MALDI)

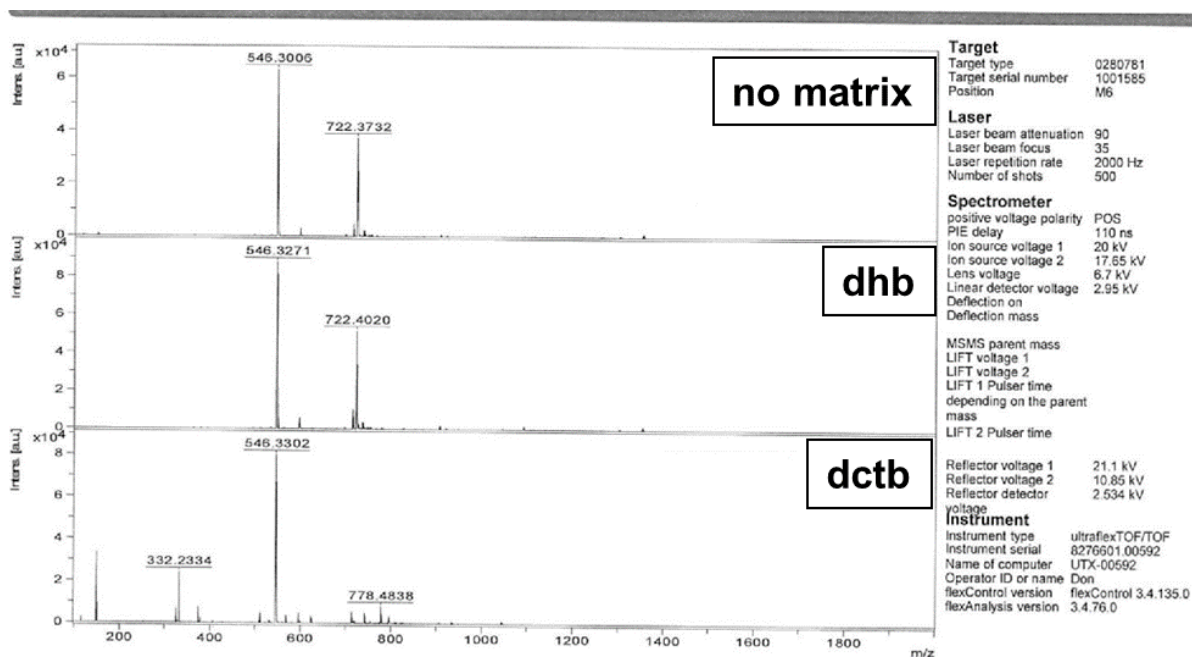

## HRMS (MALDI)

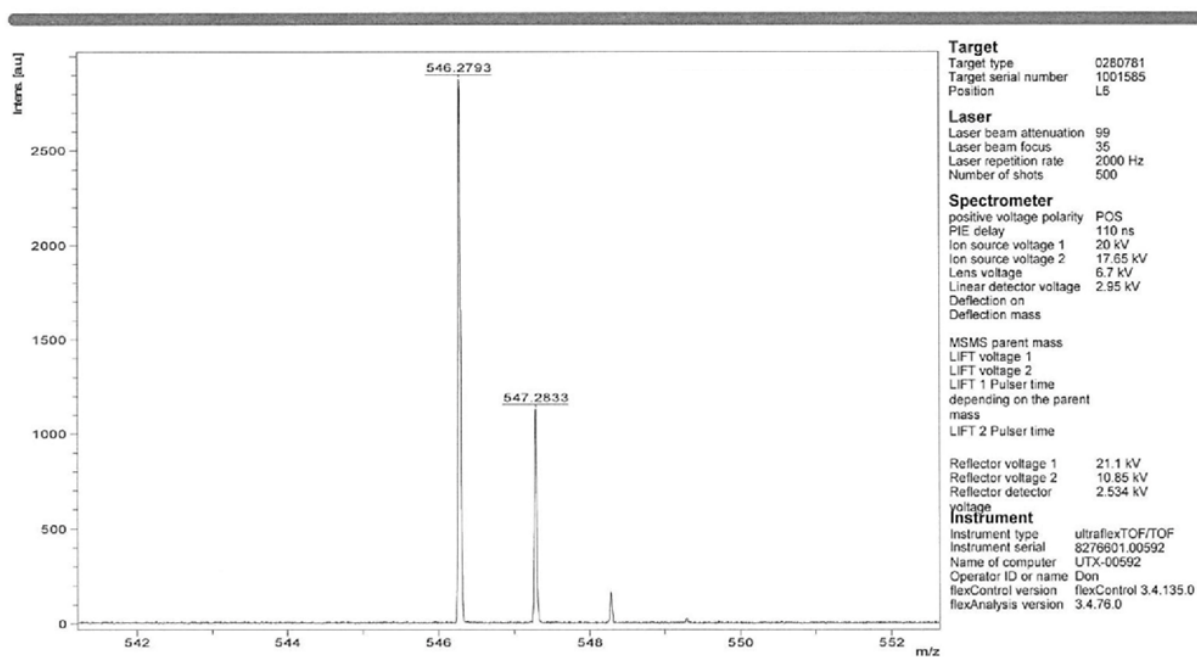

### SmartFormula

| Formula                                        | Mass     | Error  | mSigma  | DbIEq | N rule | Electron Configuration |
|------------------------------------------------|----------|--------|---------|-------|--------|------------------------|
| C <sub>38</sub> H <sub>34</sub> N <sub>4</sub> | 546.2778 | 2.8010 | 48.8215 | 24.00 | ok     | odd                    |

Figure S2. MS/HRMS (MALDI) of 15.

$^1\text{H}$  NMR (400 MHz,  $\text{CD}_2\text{Cl}_2$ , rt)

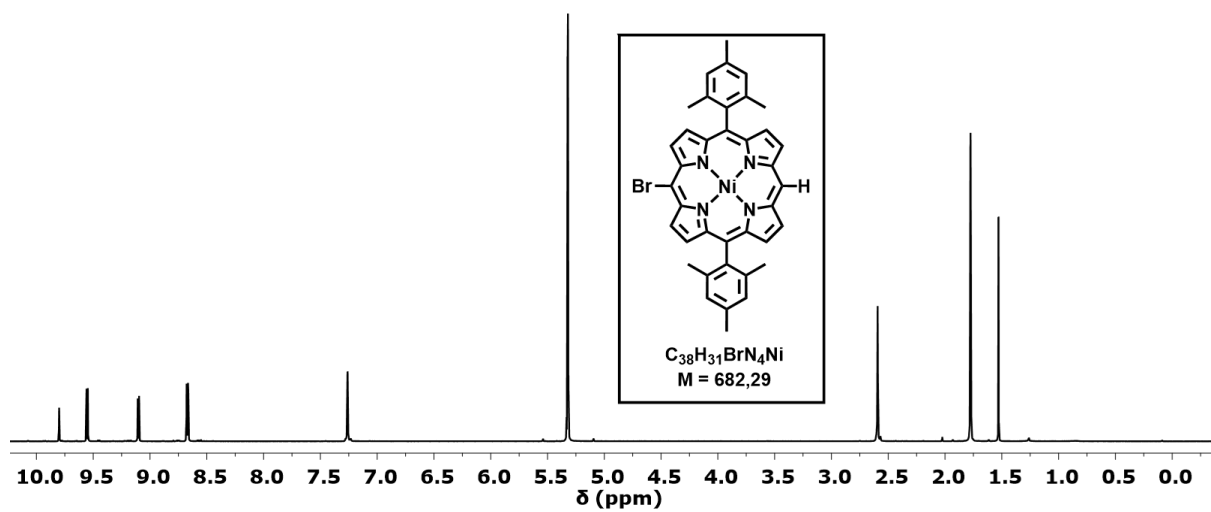

$^{13}\text{C}$  NMR (101 MHz,  $\text{CD}_2\text{Cl}_2$ , rt)

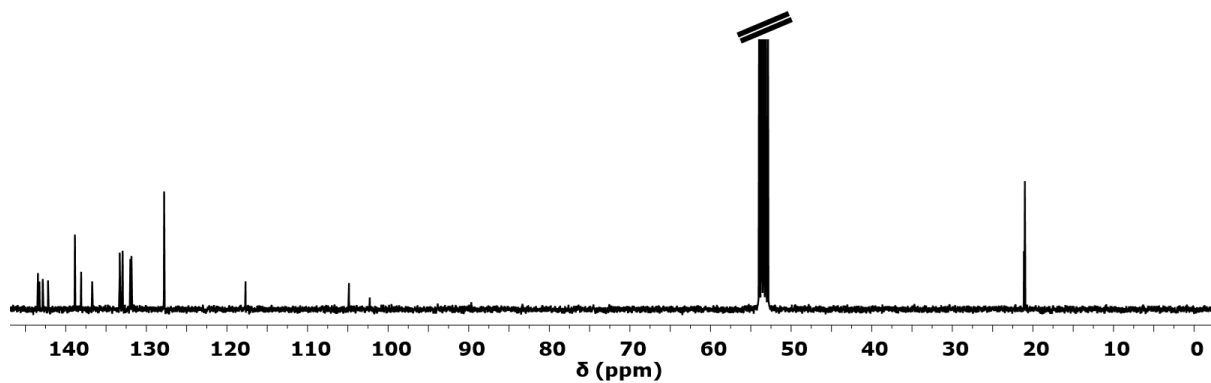

Figure S3.  $^1\text{H}$  and  $^{13}\text{C}$  NMR of 17.

## MS (MALDI)

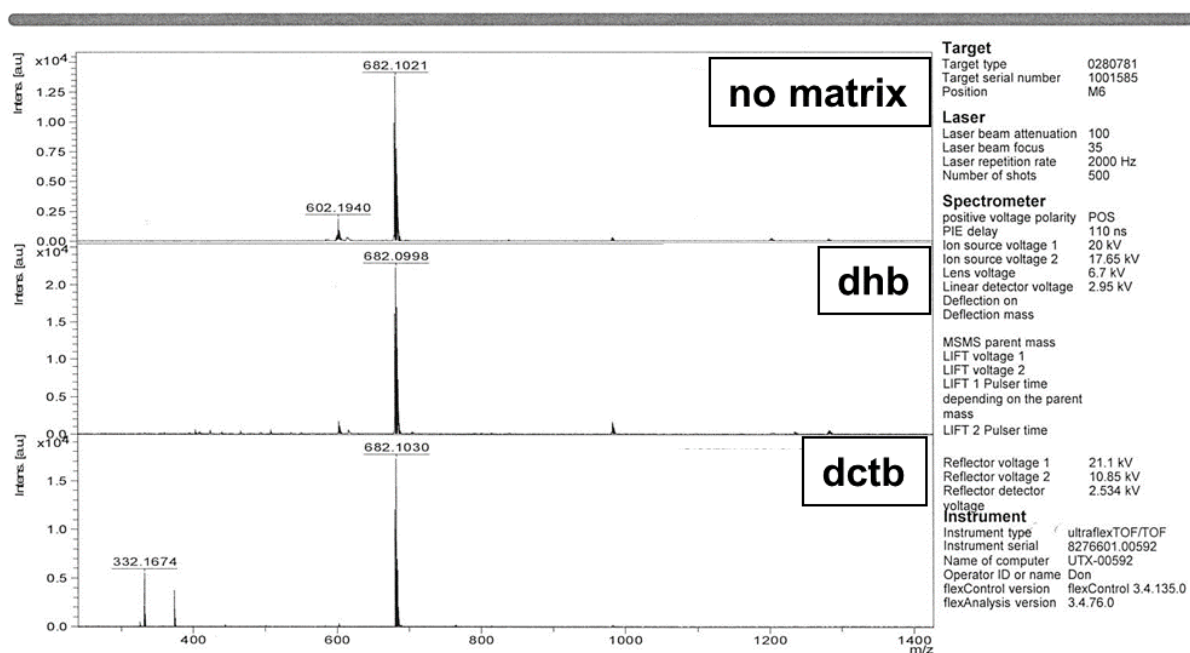

## HRMS (MALDI)

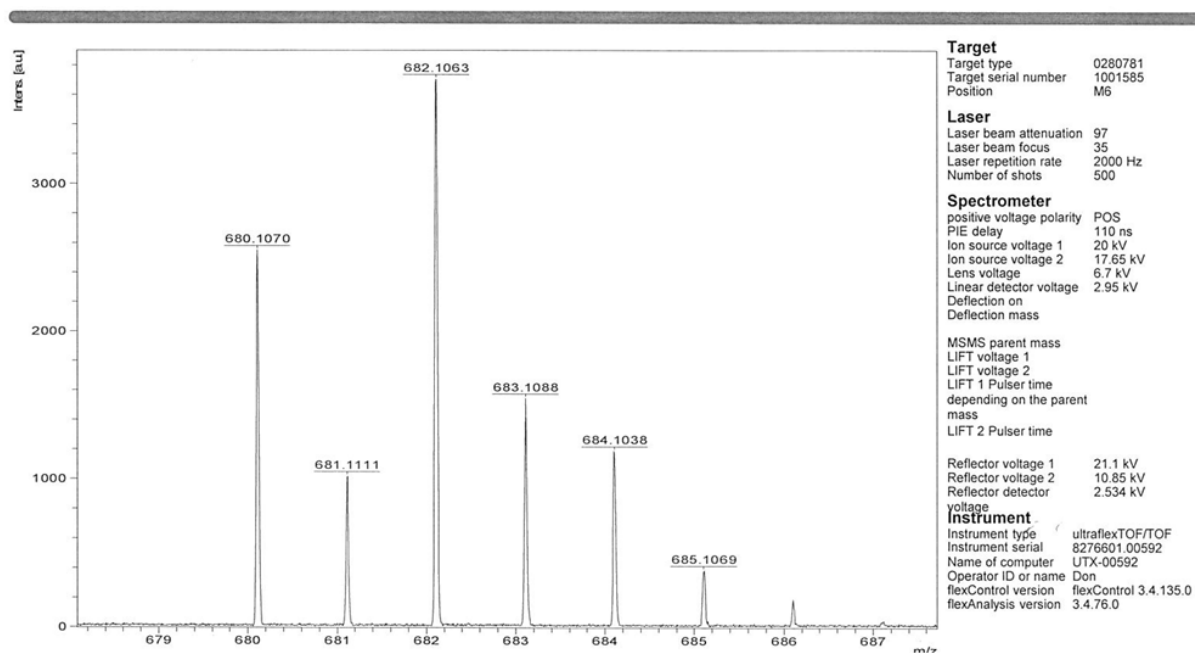

### SmartFormula

| Formula                | Mass     | Error  | mSigma  | DblEq | N rule | Electron Configuration |
|------------------------|----------|--------|---------|-------|--------|------------------------|
| C 38 H 31<br>Br N 4 Ni | 680.1080 | 1.4813 | 36.9206 | 25.00 | ok     | odd                    |

Figure S4. MS/HRMS (MALDI) of 17.

$^1\text{H}$  NMR (400 MHz,  $\text{CDCl}_3$ , rt)

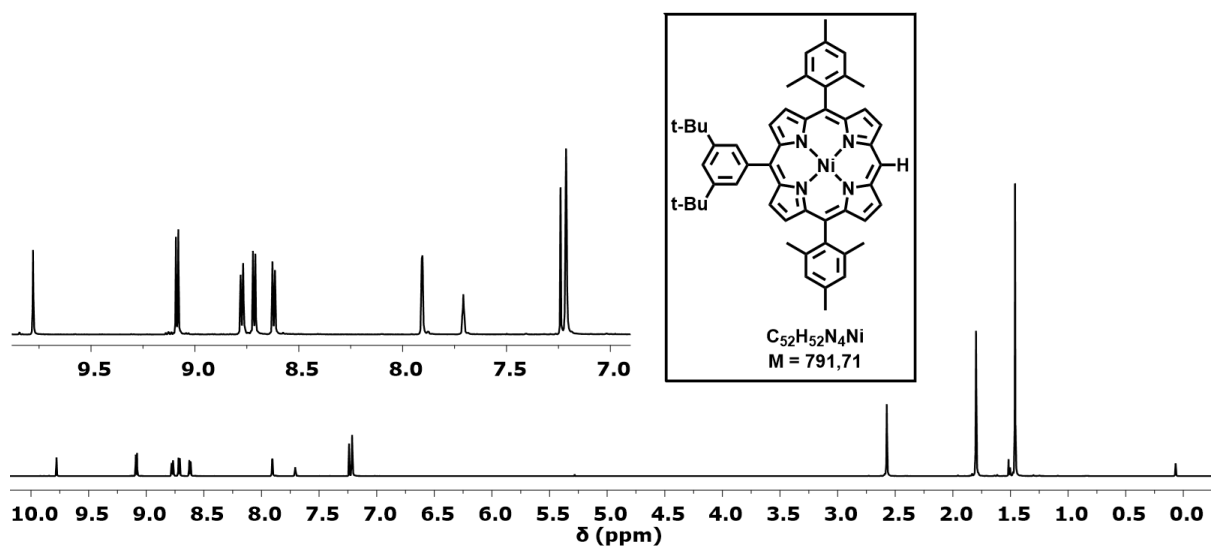

$^{13}\text{C}$  NMR (101 MHz,  $\text{CDCl}_3$ , rt)

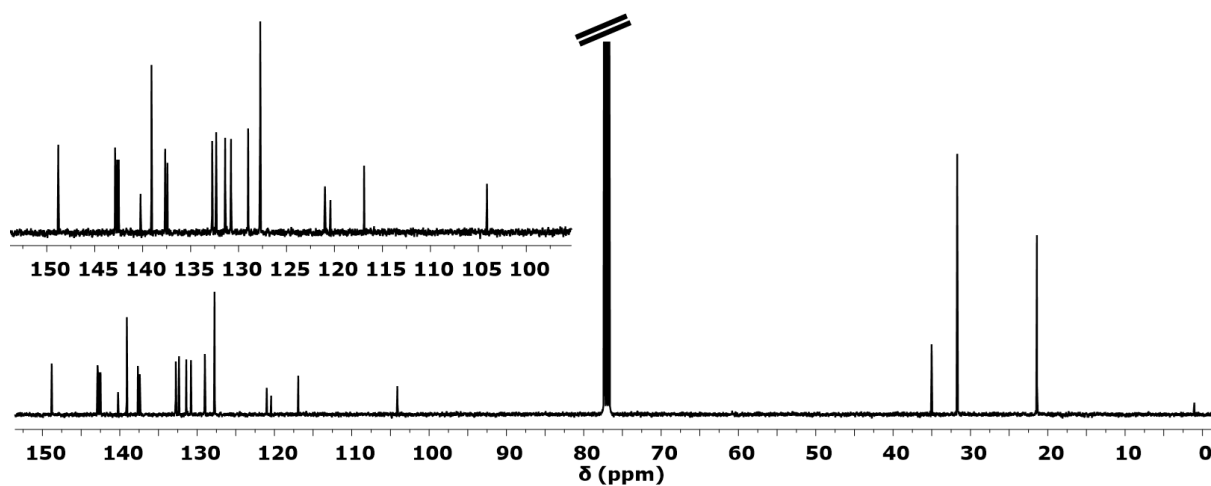

Figure S5.  $^1\text{H}$  and  $^{13}\text{C}$  NMR of 18.

## MS (MALDI)

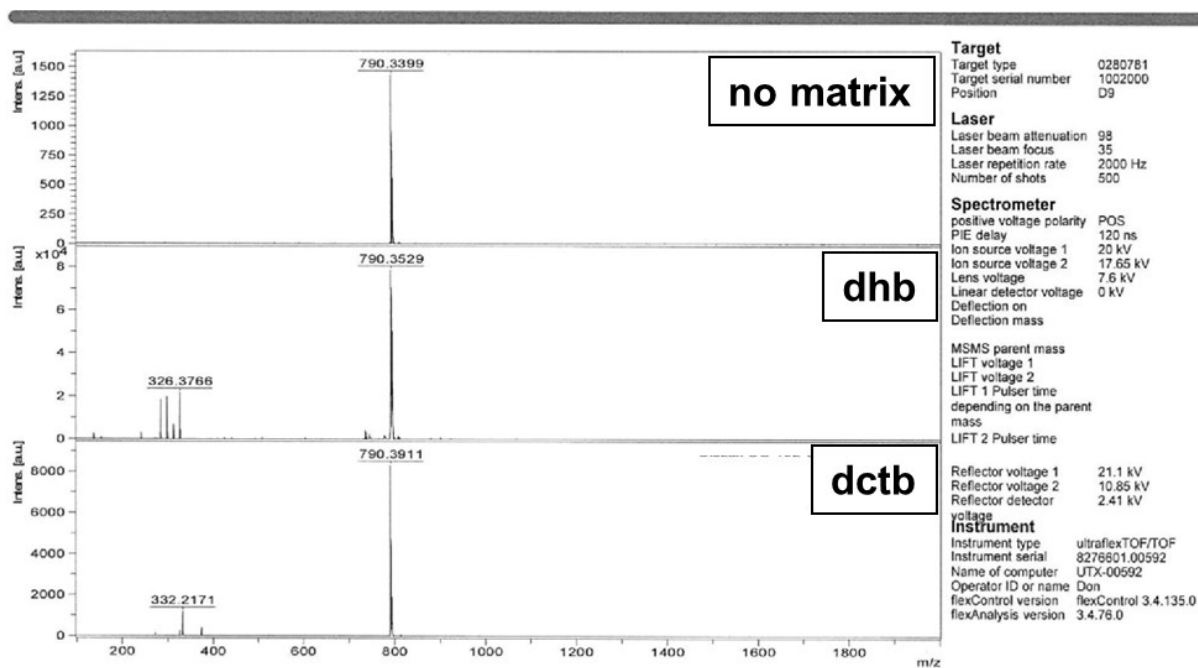

## HRMS (MALDI)

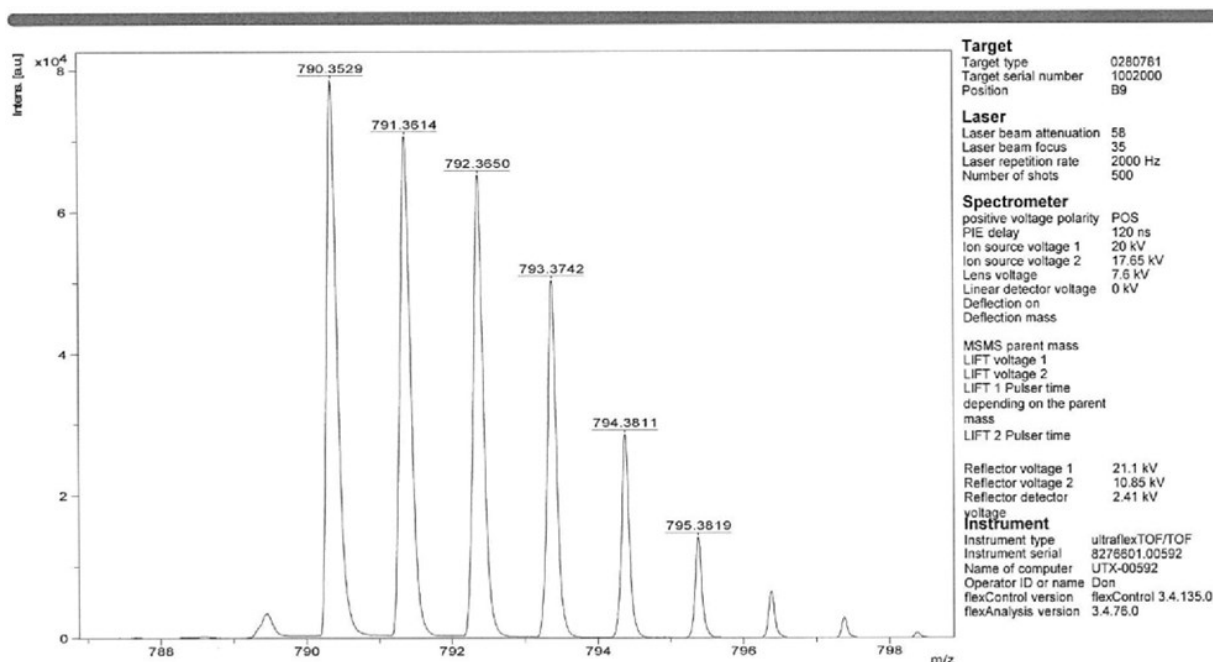

### SmartFormula

| Formula             | Mass     | Error  | mSigma   | DblEq | N rule | Electron Configuration |
|---------------------|----------|--------|----------|-------|--------|------------------------|
| C 52 H 52<br>N 4 Ni | 790.3540 | 1.3846 | 219.2905 | 29.00 | ok     | odd                    |

Figure S6. MS/HRMS (MALDI) of 18.



$^1\text{H}$  NMR (400 MHz,  $\text{CDCl}_3$ , rt)

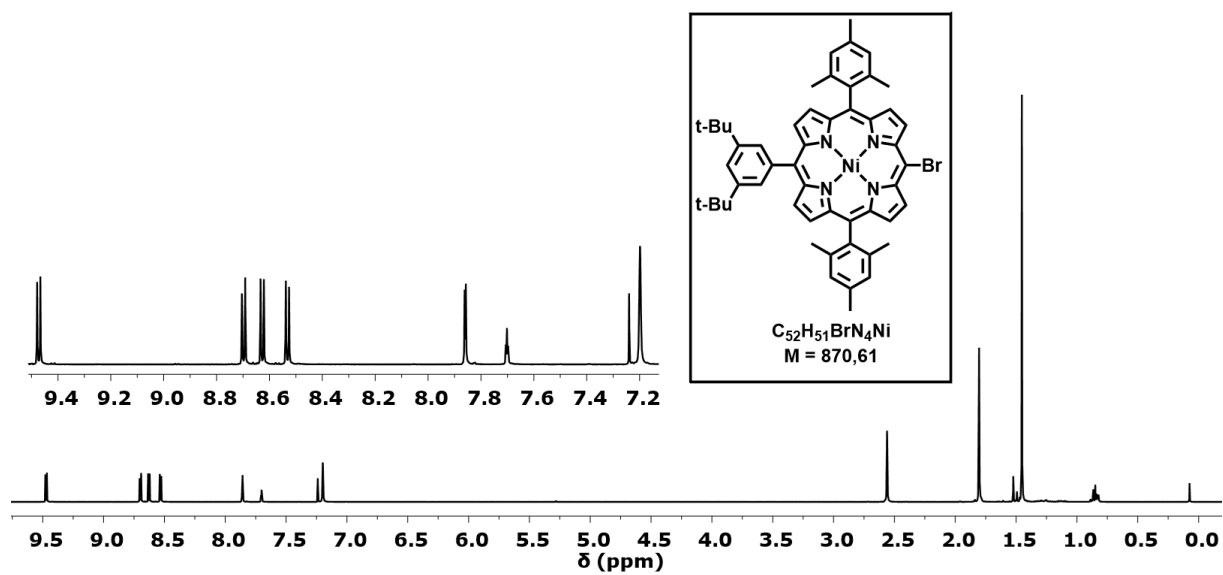

$^{13}\text{C}$  NMR (101 MHz,  $\text{CDCl}_3$ , rt)

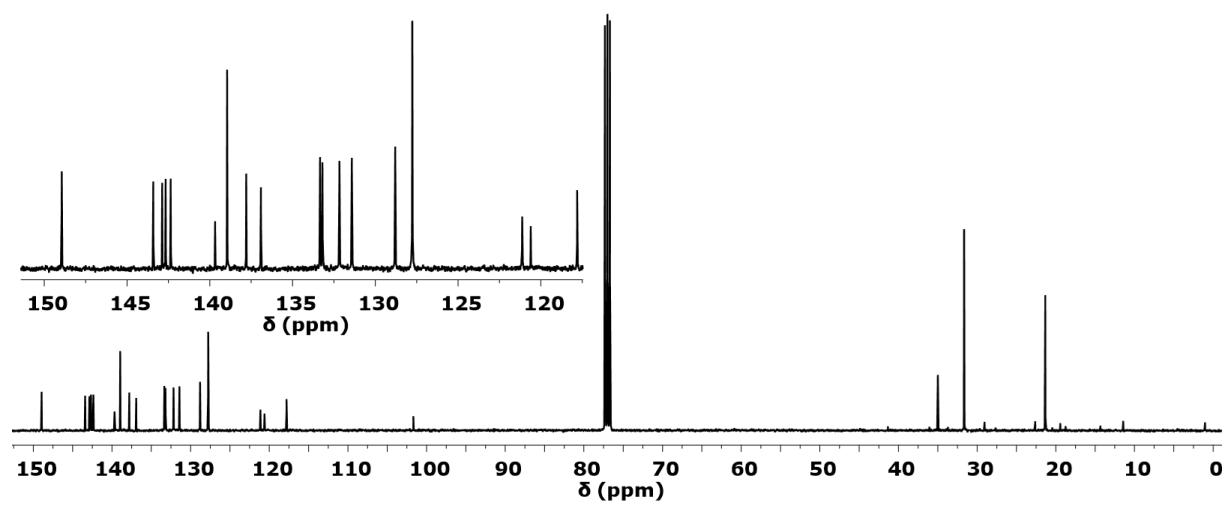

Figure S7.  $^1\text{H}$  and  $^{13}\text{C}$  NMR of **3**.

## MS (MALDI)

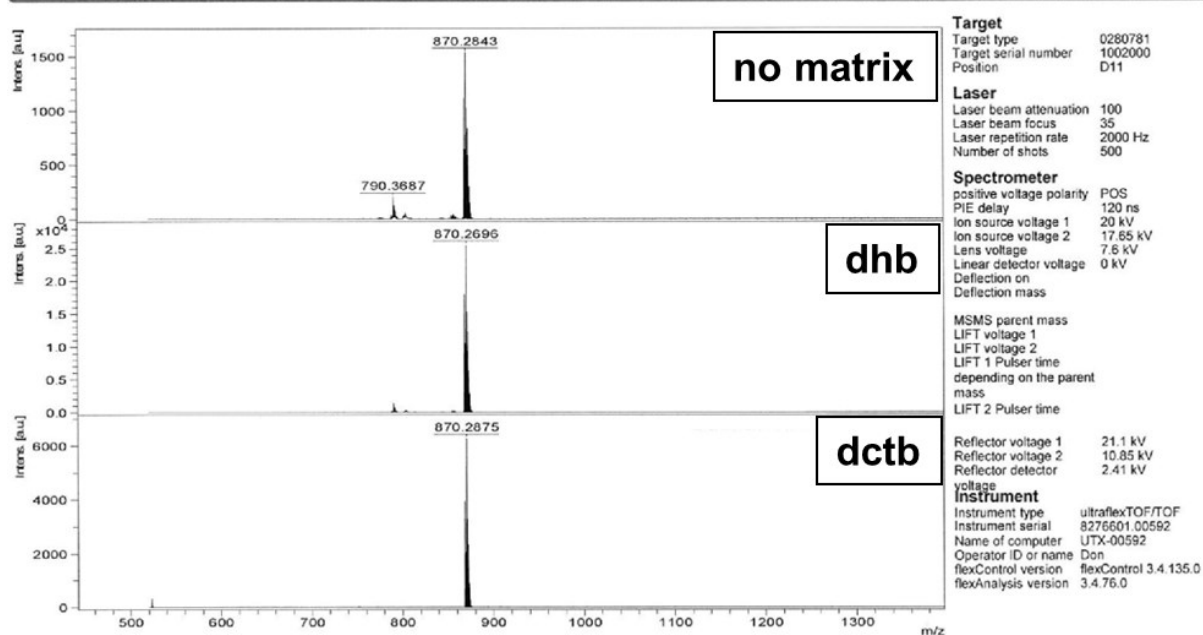

## HRMS (MALDI)

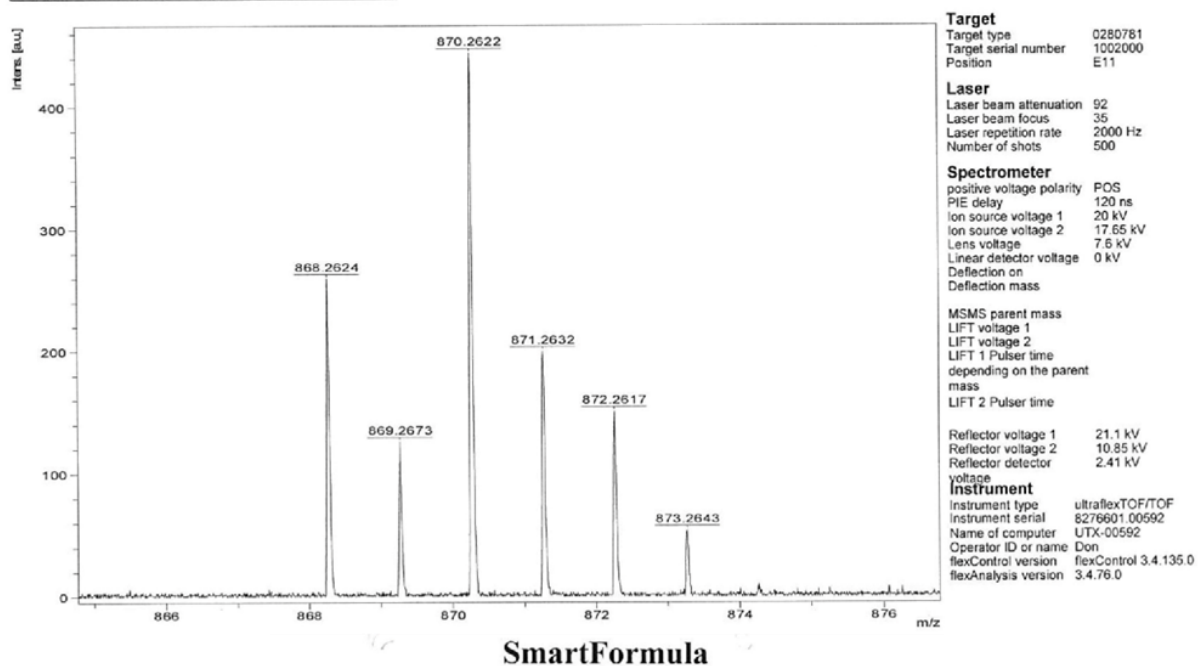

### SmartFormula

| Formula                | Mass     | Error  | mSigma  | DblEq | N rule | Electron Configuration |
|------------------------|----------|--------|---------|-------|--------|------------------------|
| C 52 H 51<br>Br N 4 Ni | 868.2645 | 2.4787 | 72.7265 | 29.00 | ok     | odd                    |

Figure S8. MS/HRMS (MALDI) of **3**.

$^1\text{H}$  NMR (400 MHz,  $\text{CD}_2\text{Cl}_2$ , rt)

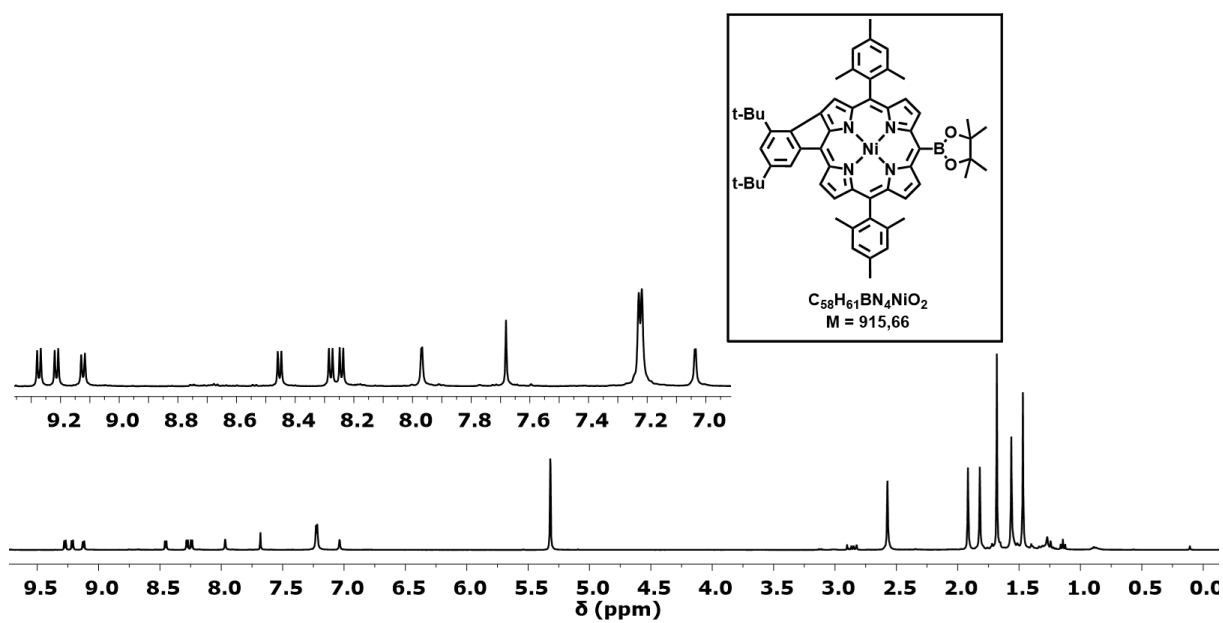

$^{13}\text{C}$  NMR (101 MHz,  $\text{CD}_2\text{Cl}_2$ , rt)

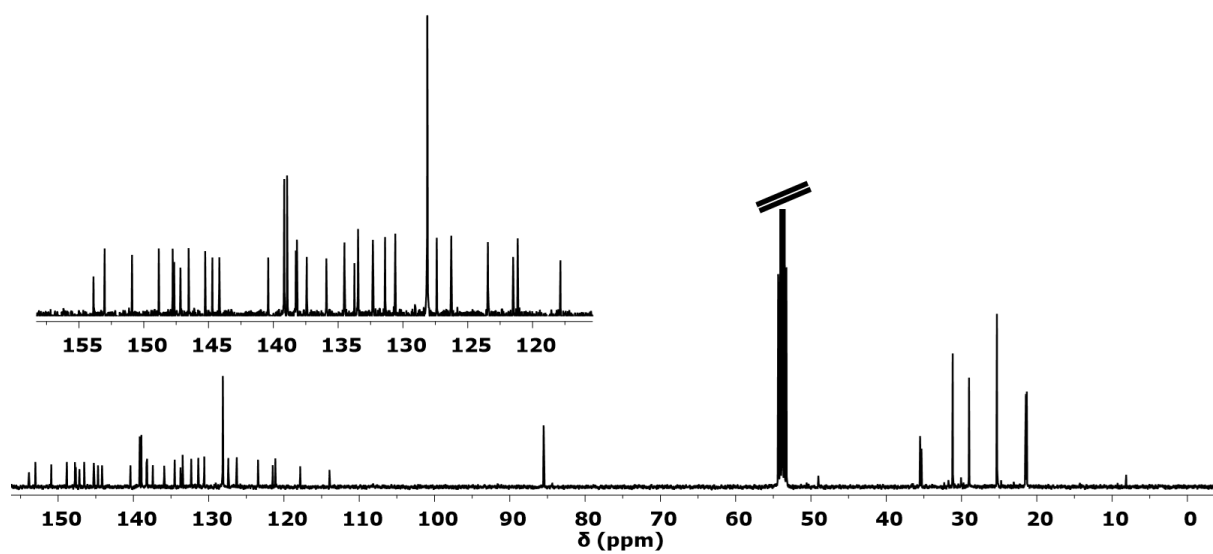

Figure S9.  $^1\text{H}$  and  $^{13}\text{C}$  NMR of 5.

## MS (MALDI)

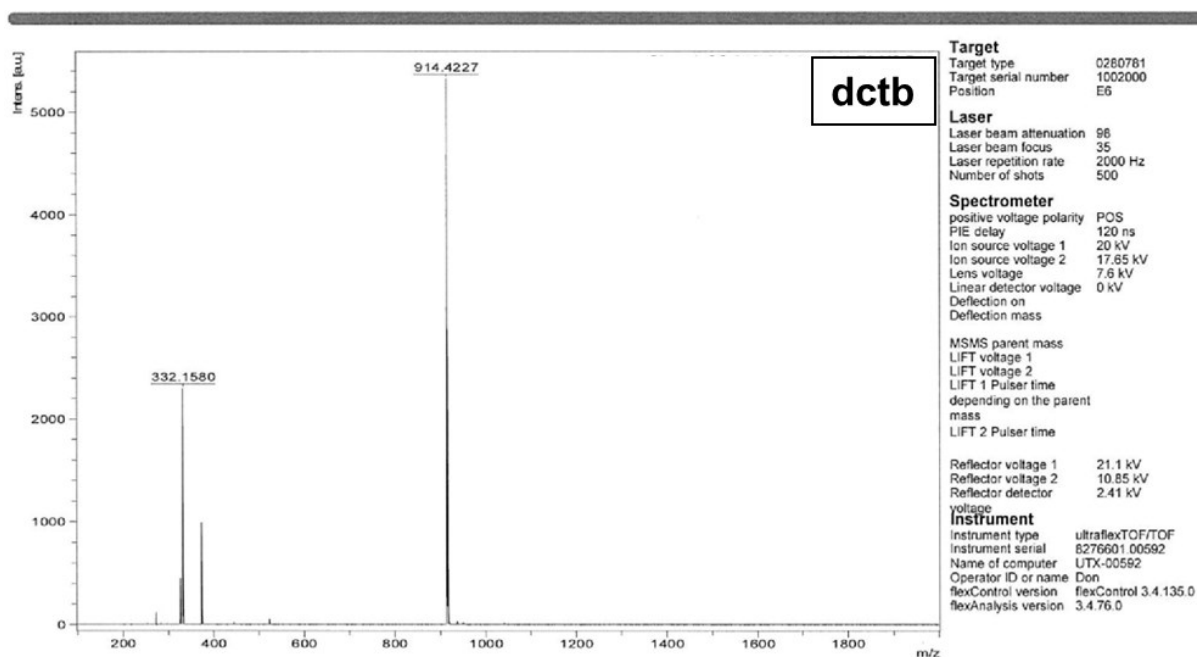

## HRMS (MALDI)

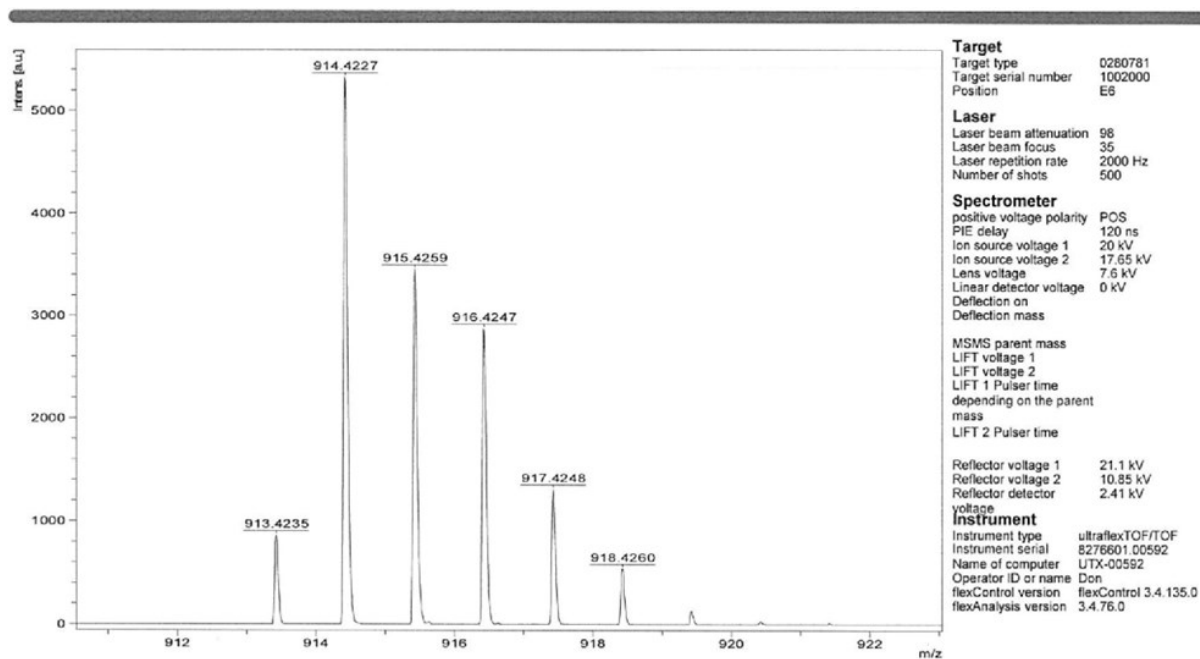

### SmartFormula

| Formula                      | Mass     | Error  | mSigma  | DbIEq | N rule | Electron Configuration |
|------------------------------|----------|--------|---------|-------|--------|------------------------|
| C 58 H 61<br>B N 4 Ni<br>O 2 | 914.4236 | 0.9784 | 40.2851 | 31.00 | ok     | odd                    |

Figure S10. MS/HRMS (MALDI) of 5.

$^1\text{H}$  NMR (601 MHz,  $\text{CD}_2\text{Cl}_2$ , rt)

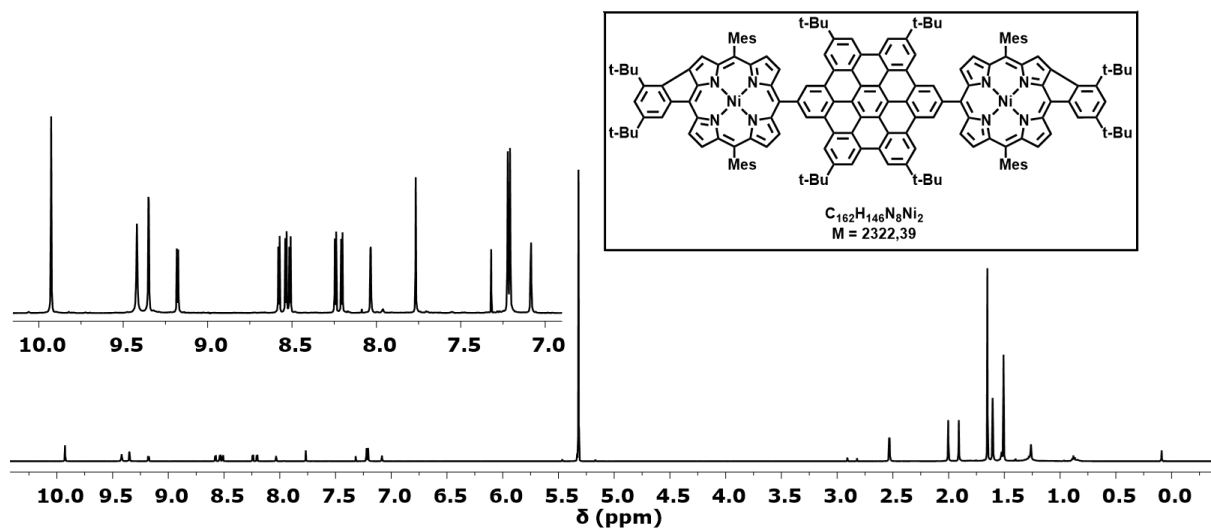

$^{13}\text{C}$  NMR - DEPTQ135 (151 MHz,  $\text{CD}_2\text{Cl}_2$ , rt)

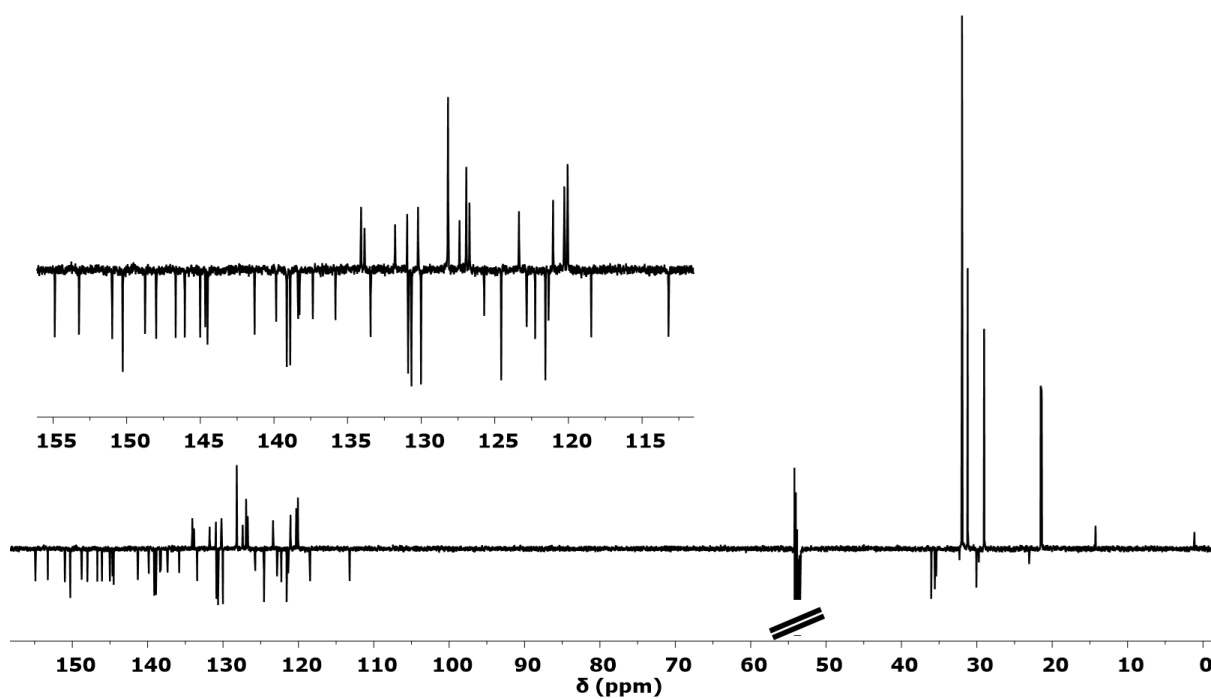

Figure S11.  $^1\text{H}$  and  $^{13}\text{C}$  NMR (DEPTQ135) of *p*-Ph.

$^1\text{H}$ - $^1\text{H}$  COSY (601 MHz,  $\text{CD}_2\text{Cl}_2$ , rt)

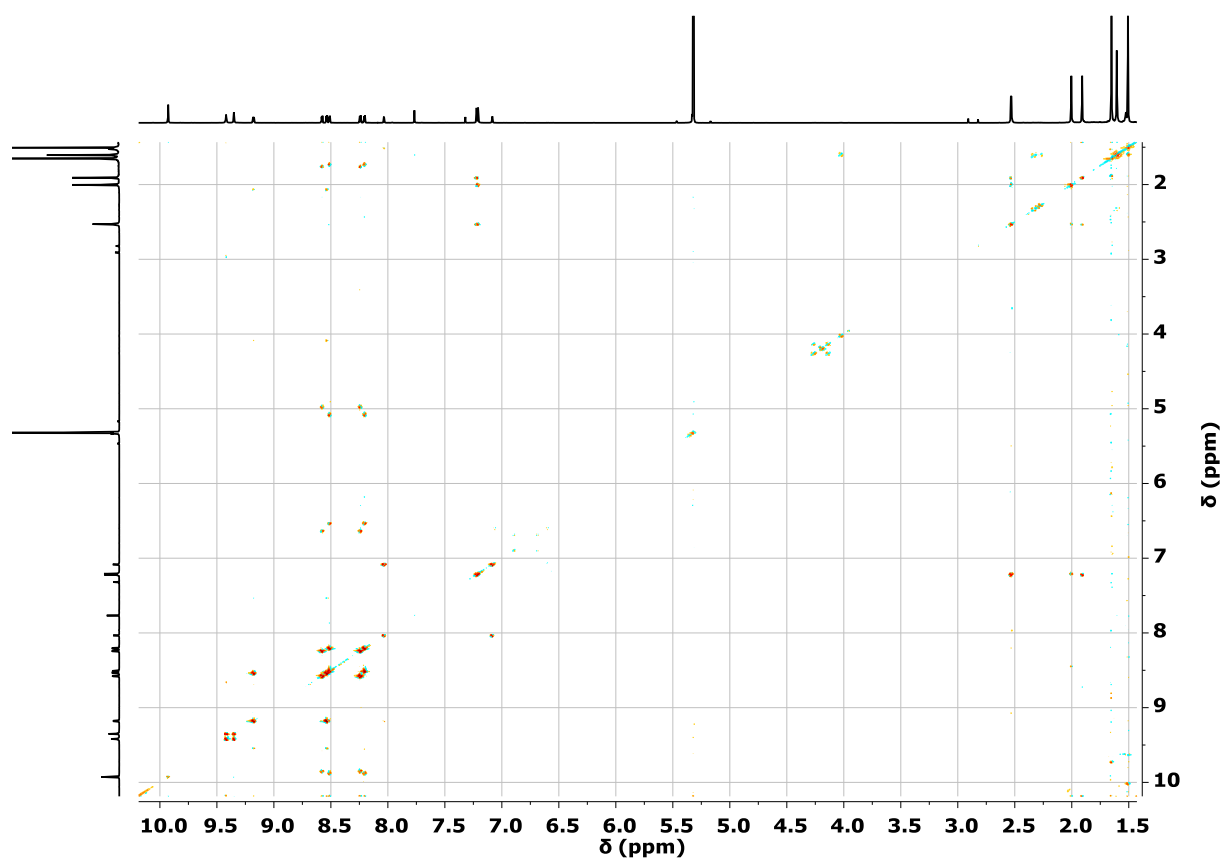

Figure S12.  $^1\text{H}$ - $^1\text{H}$  COSY of *p*-Ph.

$^1\text{H}$ - $^{13}\text{C}$  HSQC (601 MHz,  $\text{CD}_2\text{Cl}_2$ , rt)

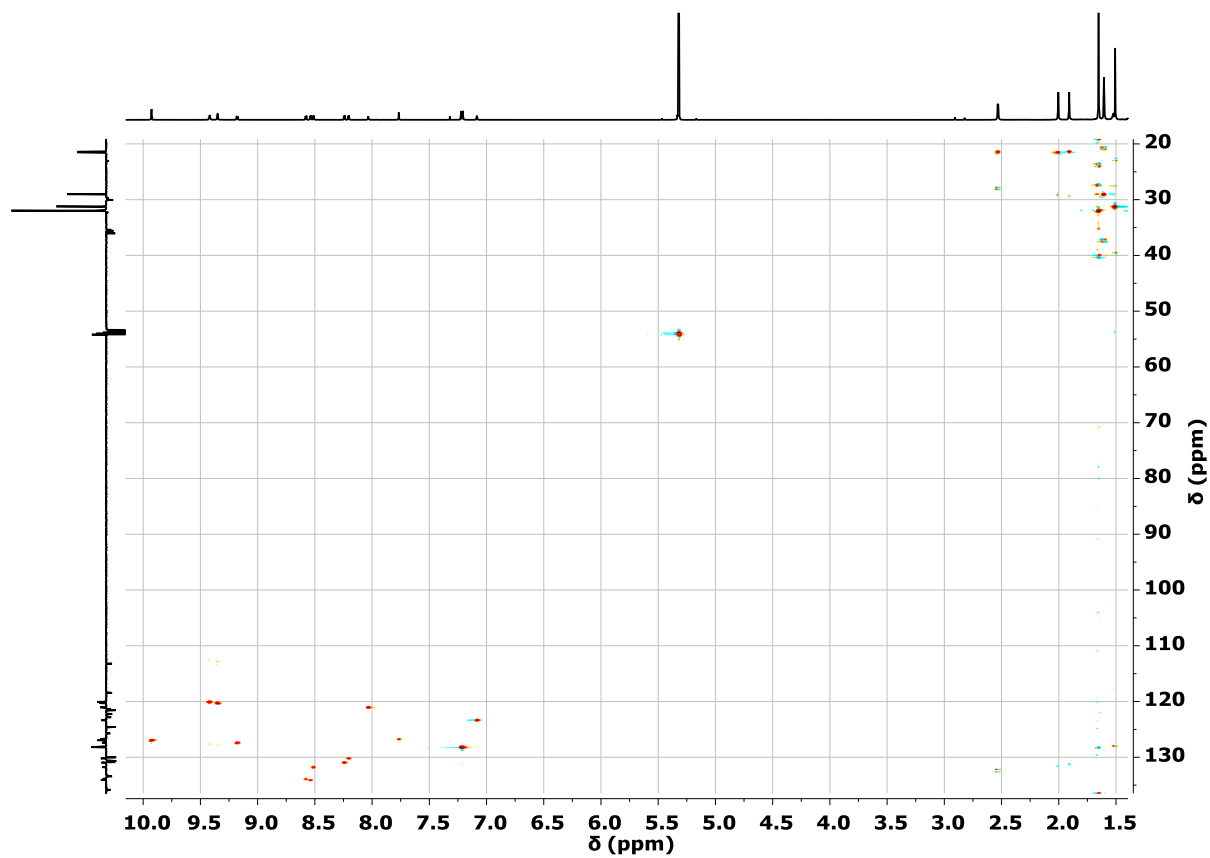

Figure S13.  $^1\text{H}$ - $^{13}\text{C}$  HSQC of *p*-Ph.

$^1\text{H}$ - $^{13}\text{C}$  HMBC (601 MHz,  $\text{CD}_2\text{Cl}_2$ , rt)

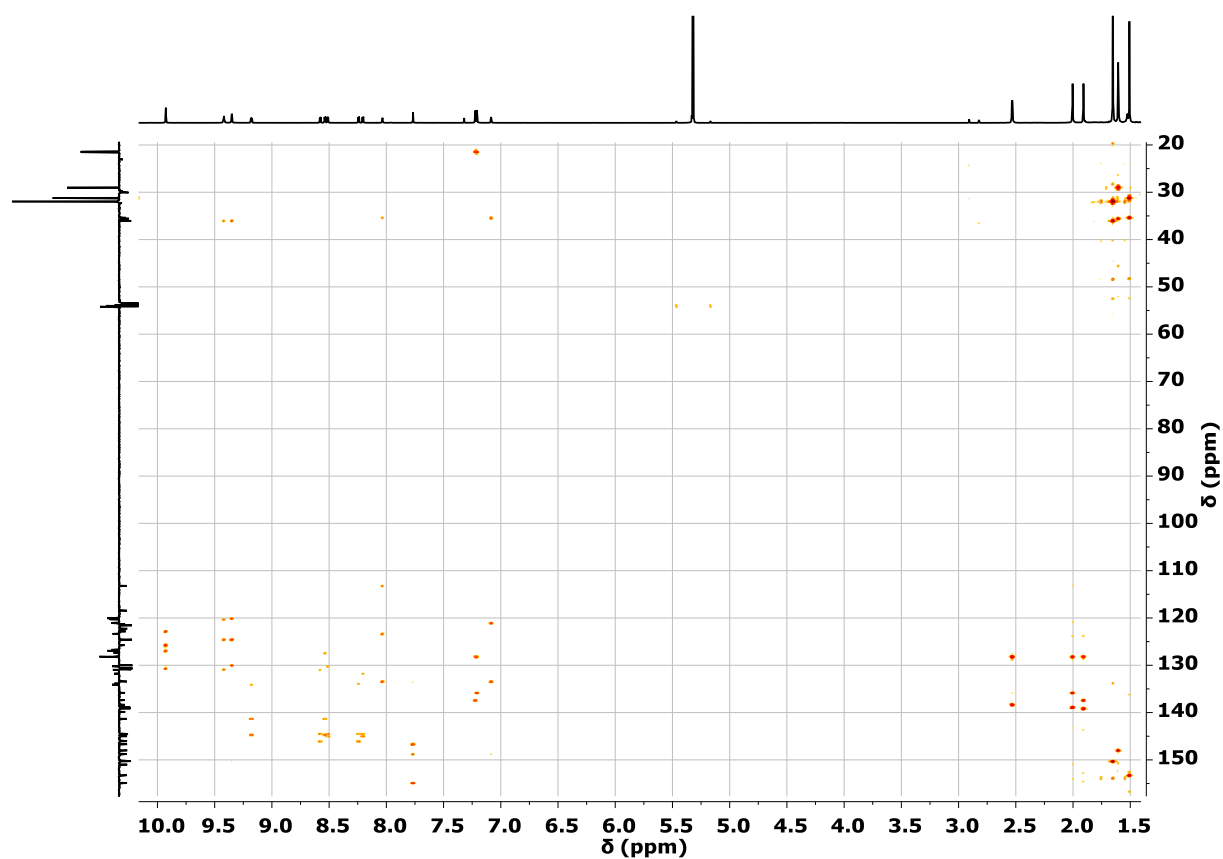

Figure S14.  $^1\text{H}$ - $^{13}\text{C}$  HMBC of *p*-Ph.



$^1\text{H}$ - $^1\text{H}$  ROESY (601 MHz,  $\text{CD}_2\text{Cl}_2$ , rt)

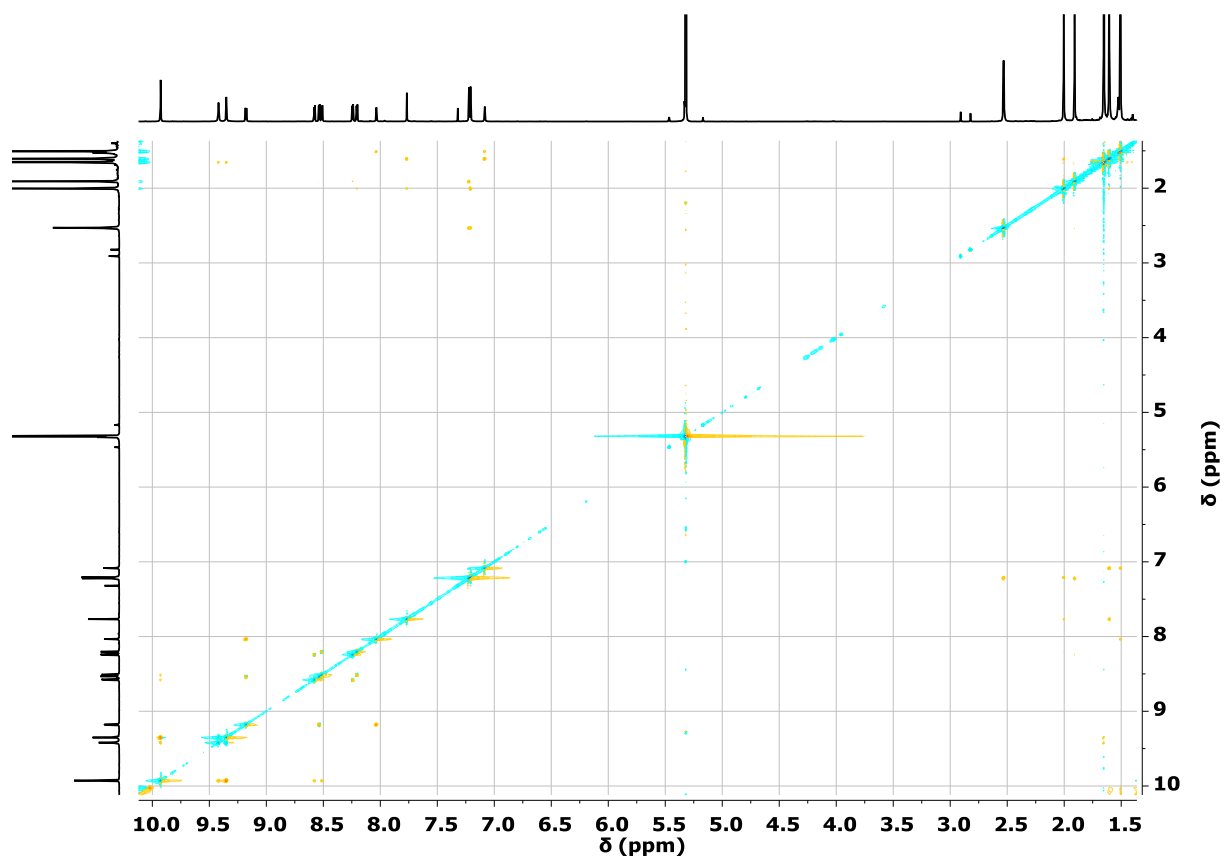

Figure S15.  $^1\text{H}$ - $^1\text{H}$  ROESY of *p*-Ph.

## MS (MALDI)

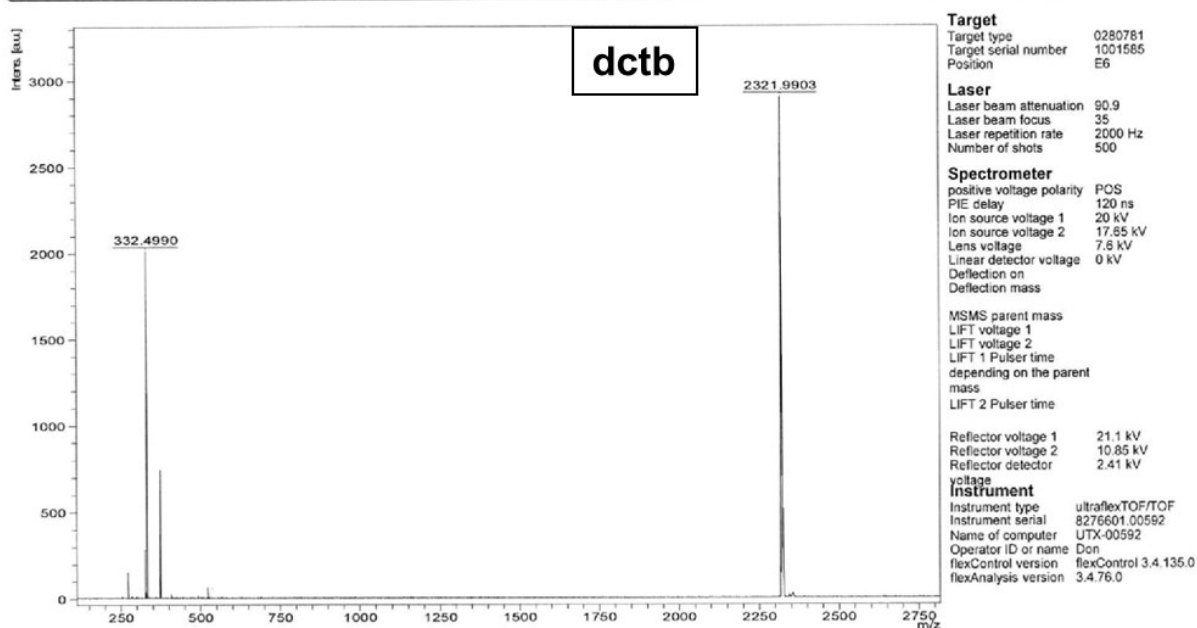

## HRMS (MALDI)

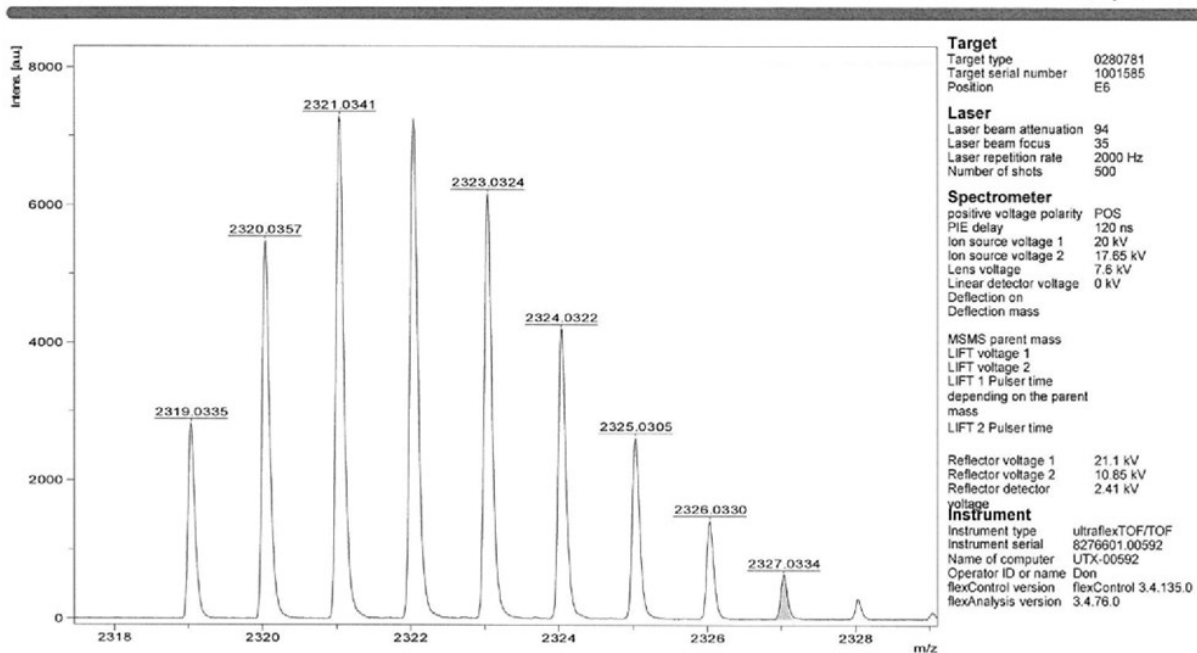

## SmartFormula

| Formula                                                          | Mass       | Error  | mSigma  | DbIEq | N rule | Electron Configuration |
|------------------------------------------------------------------|------------|--------|---------|-------|--------|------------------------|
| C <sub>162</sub> H <sub>146</sub> N <sub>8</sub> Ni <sub>2</sub> | 2,319.0372 | 1.5870 | 25.5332 | 94.00 | ok     | odd                    |

Figure S16. MS/HRMS (MALDI) of *p*-Ph.

$^1\text{H}$  NMR (601 MHz,  $\text{CD}_2\text{Cl}_2$ , rt)

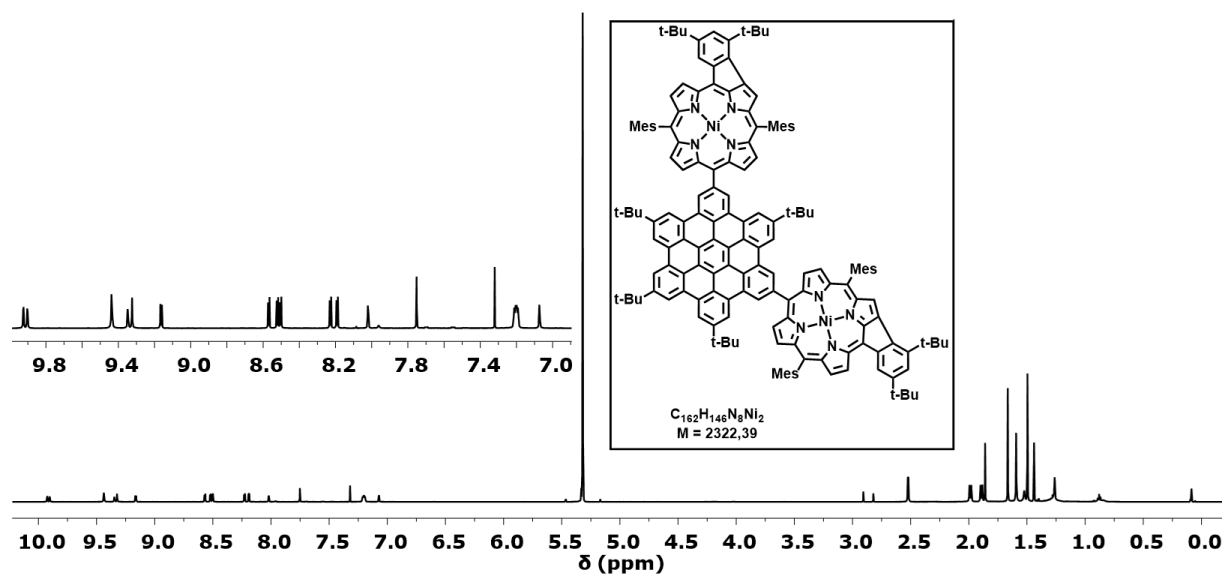

$^{13}\text{C}$  NMR - DEPTQ135 (151 MHz,  $\text{CD}_2\text{Cl}_2$ , rt)

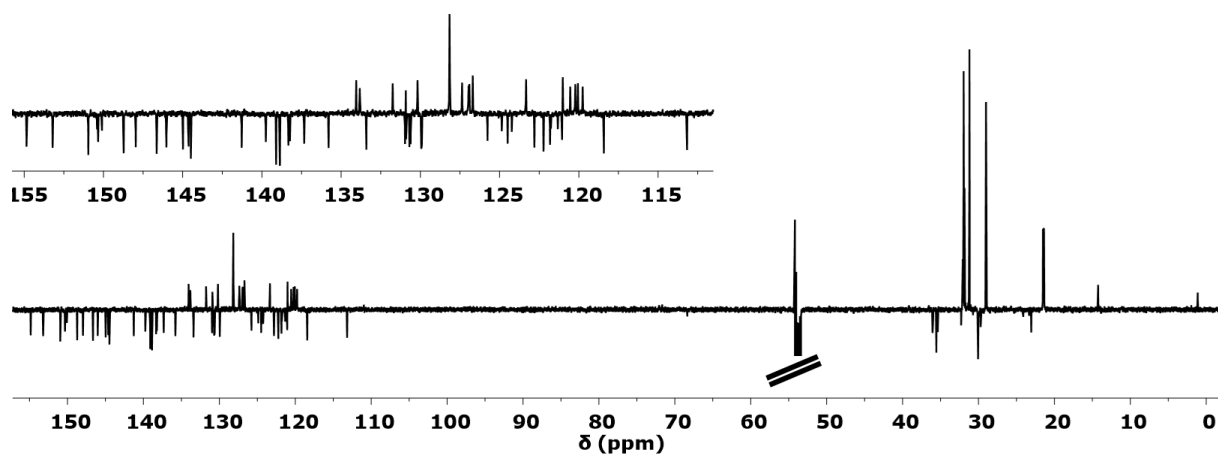

Figure S17.  $^1\text{H}$  and  $^{13}\text{C}$  NMR (DEPTQ135) of *m*-Ph.

$^1\text{H}$ - $^1\text{H}$  COSY (601 MHz,  $\text{CD}_2\text{Cl}_2$ , rt)

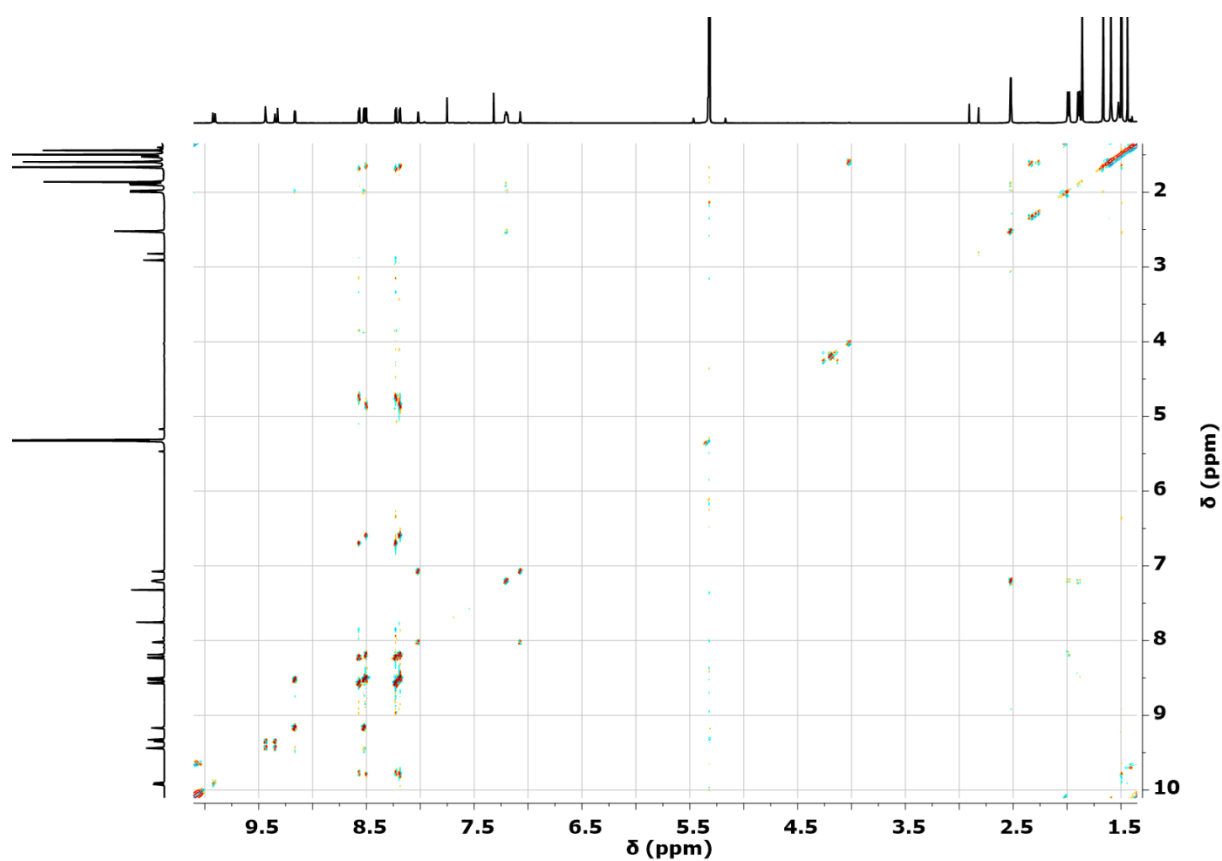

Figure S18.  $^1\text{H}$ - $^1\text{H}$  COSY of *m*-Ph.

$^1\text{H}$ - $^{13}\text{C}$  HSQC (601 MHz,  $\text{CD}_2\text{Cl}_2$ , rt)

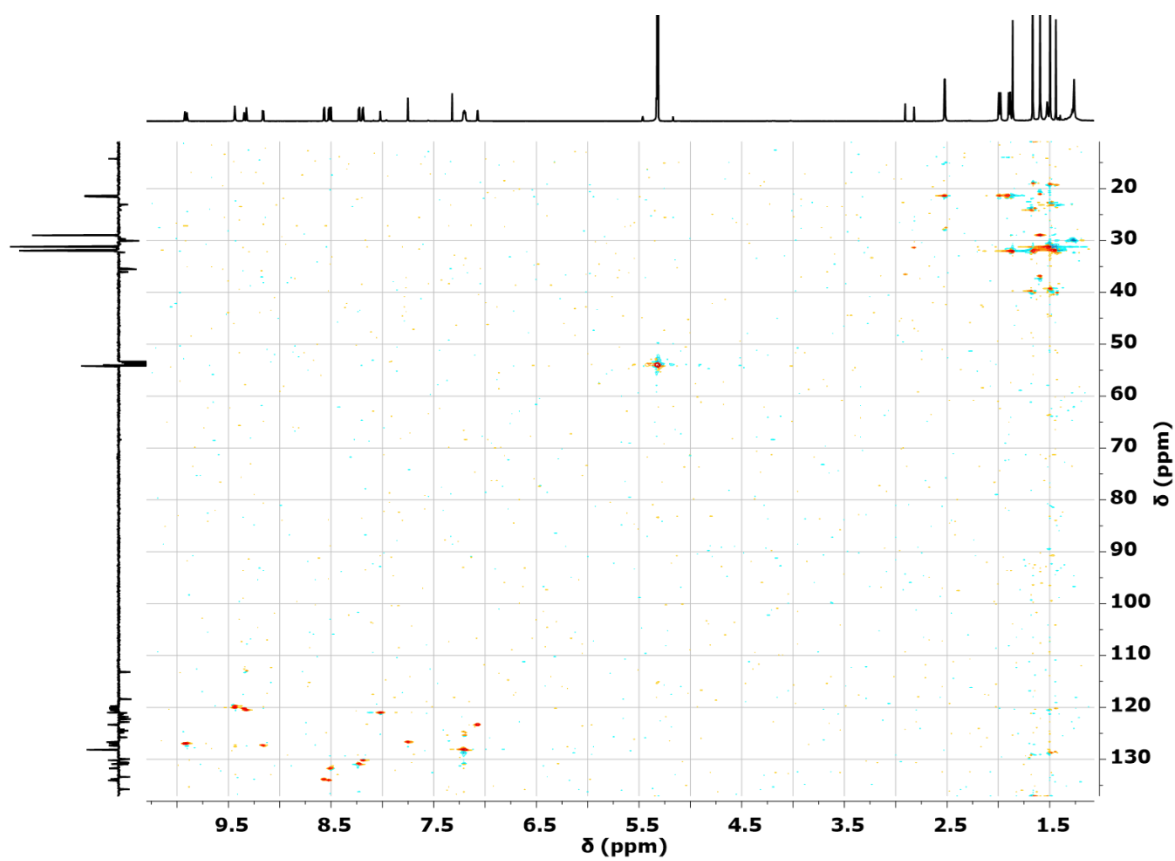

Figure S19.  $^1\text{H}$ - $^{13}\text{C}$  HSQC of *m*-Ph.

$^1\text{H}$ - $^{13}\text{C}$  HMBC (601 MHz,  $\text{CD}_2\text{Cl}_2$ , rt)

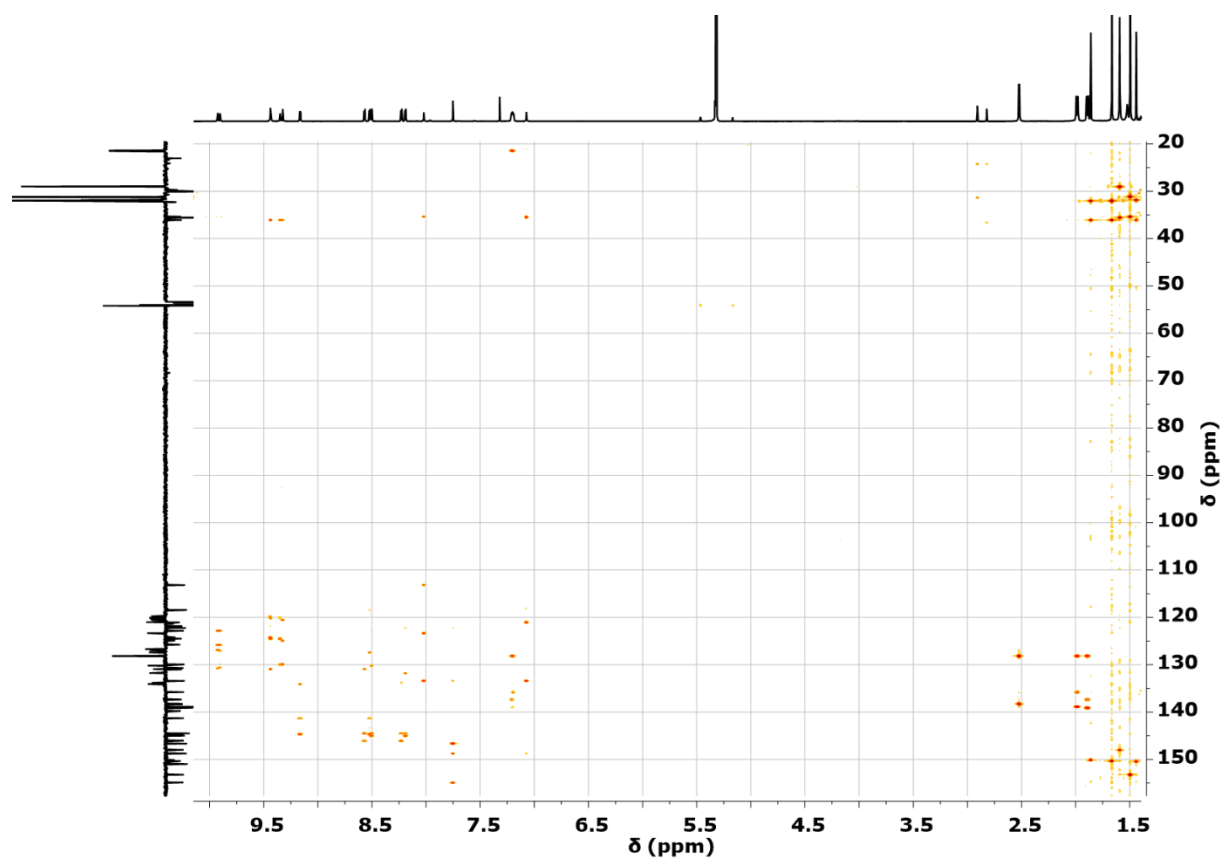

Figure S20.  $^1\text{H}$ - $^{13}\text{C}$  HMBC of *m*-Ph.

$^1\text{H}$ - $^1\text{H}$  ROESY (601 MHz,  $\text{CD}_2\text{Cl}_2$ , rt)

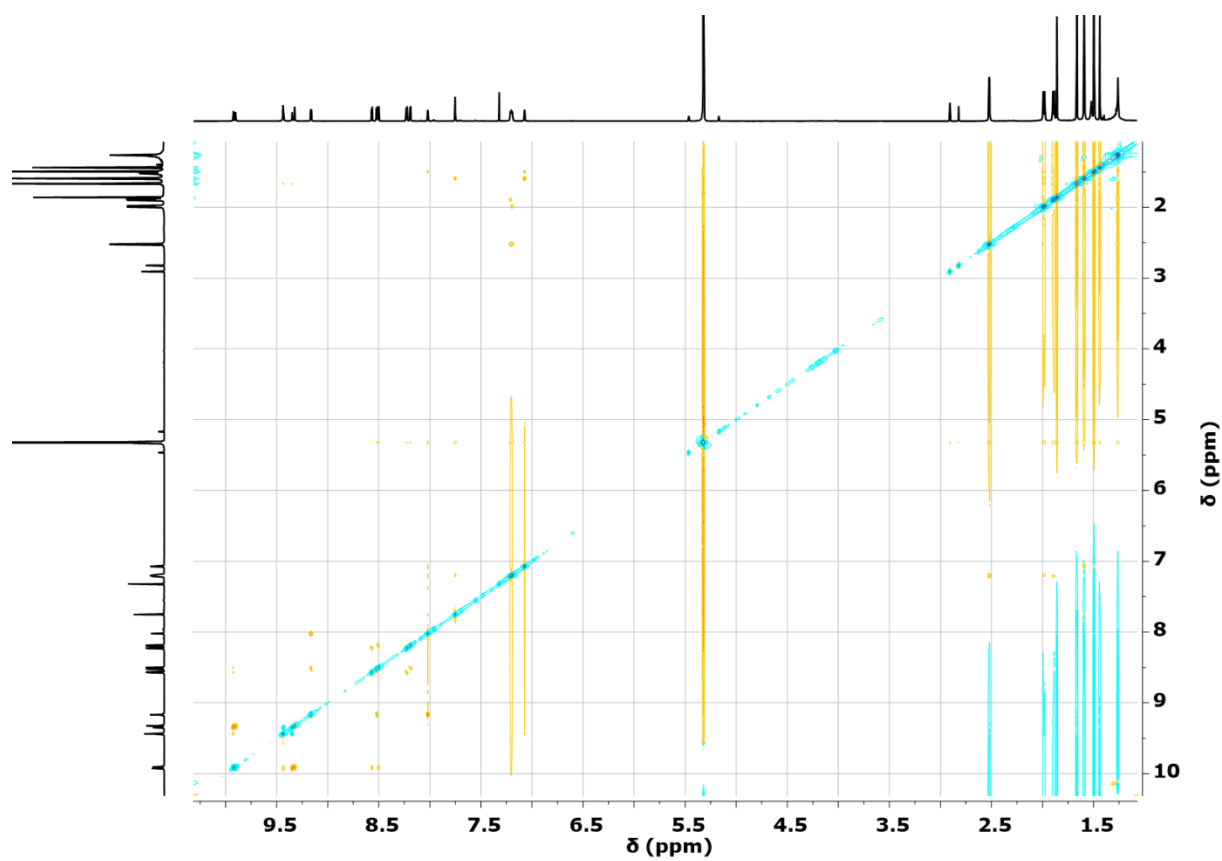

Figure S21.  $^1\text{H}$ - $^1\text{H}$  ROESY of *m*-Ph.

## MS (MALDI)

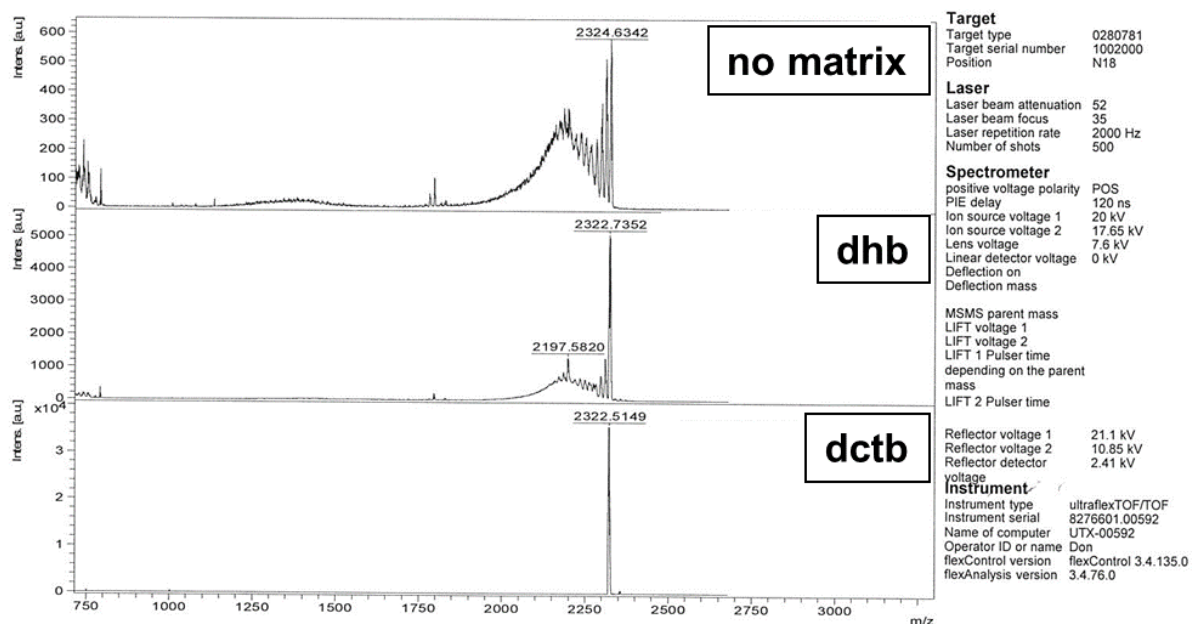

## HRMS (MALDI)

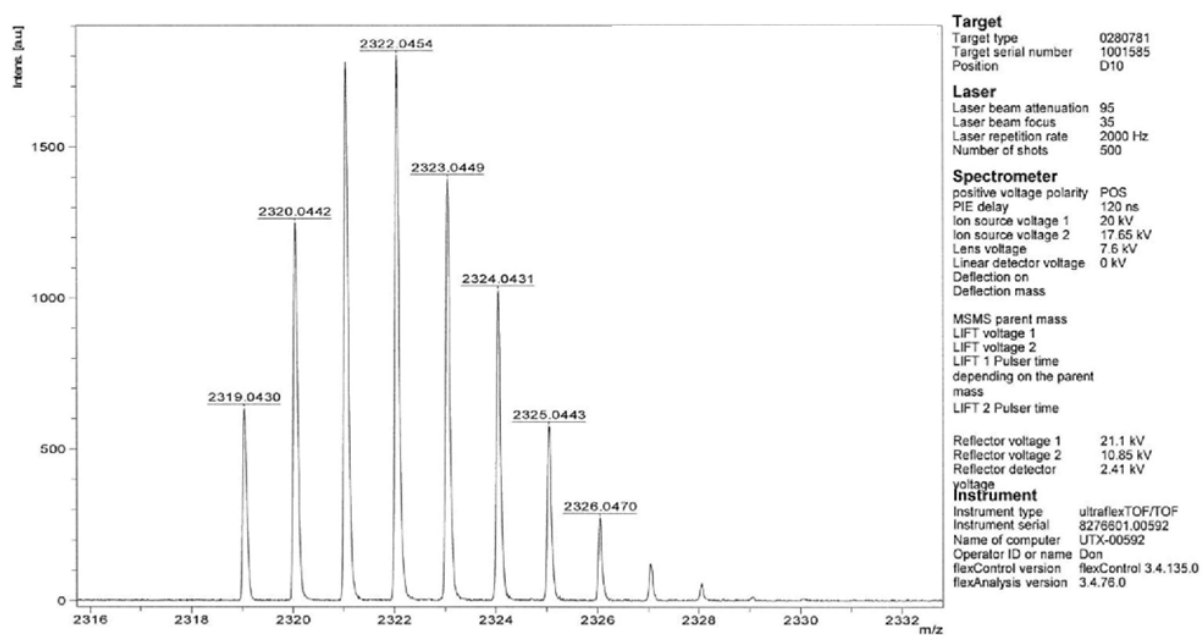

### SmartFormula

| Formula                                                          | Mass       | Error  | mSigma  | DbLEq | N rule | Electron Configuration |
|------------------------------------------------------------------|------------|--------|---------|-------|--------|------------------------|
| C <sub>162</sub> H <sub>146</sub> N <sub>8</sub> Ni <sub>2</sub> | 2,319.0372 | 2.5074 | 55.7052 | 94.00 | ok     | odd                    |

Figure S22. MS/HRMS (MALDI) of *m*-Ph.



$^1\text{H}$  NMR (601 MHz,  $\text{CD}_2\text{Cl}_2$ , rt)

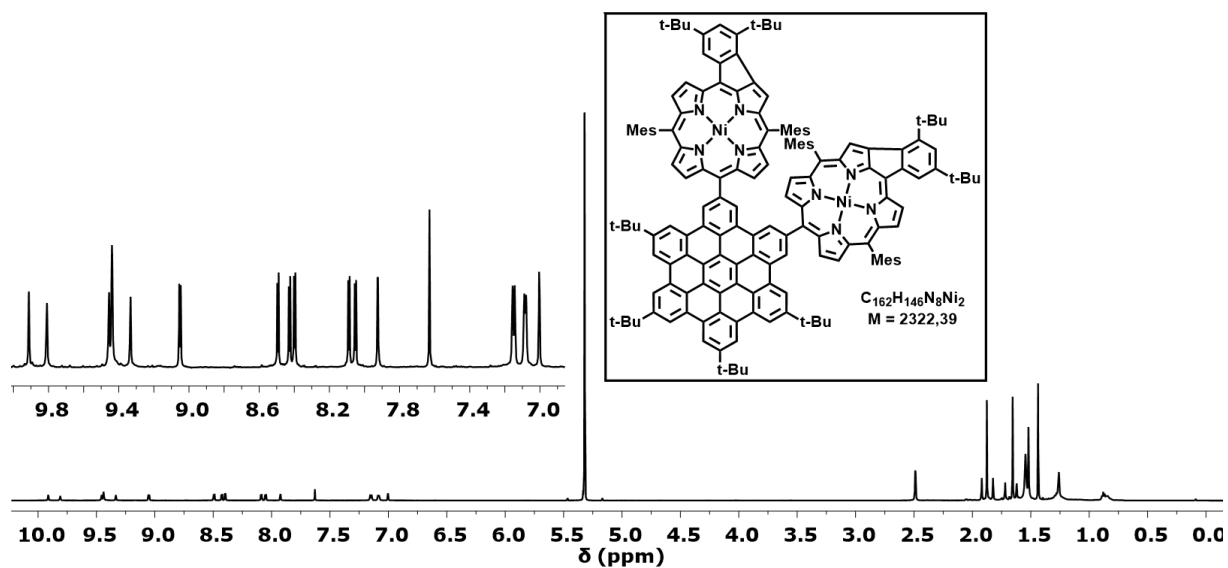

$^{13}\text{C}$  NMR - DEPTQ135 (151 MHz,  $\text{CD}_2\text{Cl}_2$ , rt)

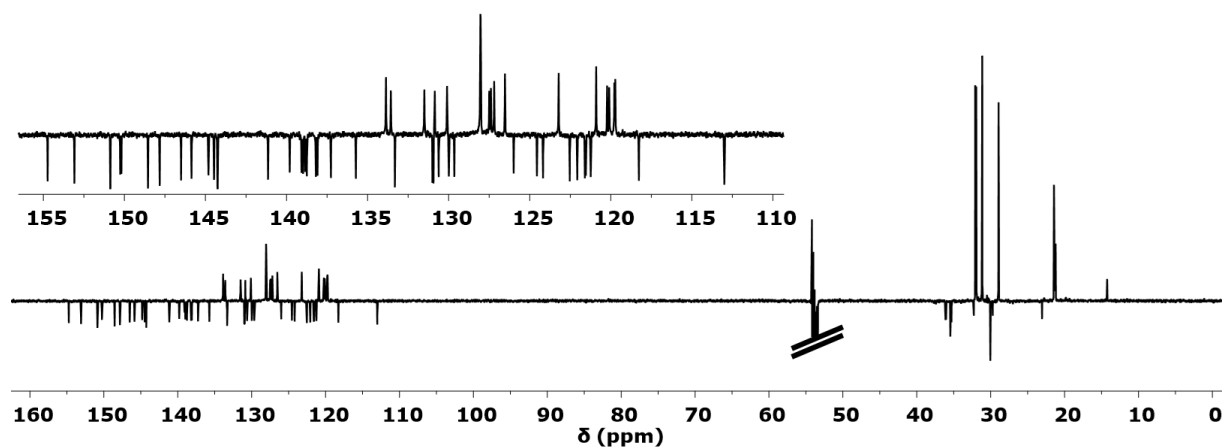

Figure S23.  $^1\text{H}$  and  $^{13}\text{C}$  NMR (DEPTQ135) of *o*-Ph.

$^1\text{H}$ - $^1\text{H}$  COSY (601 MHz,  $\text{CD}_2\text{Cl}_2$ , rt)

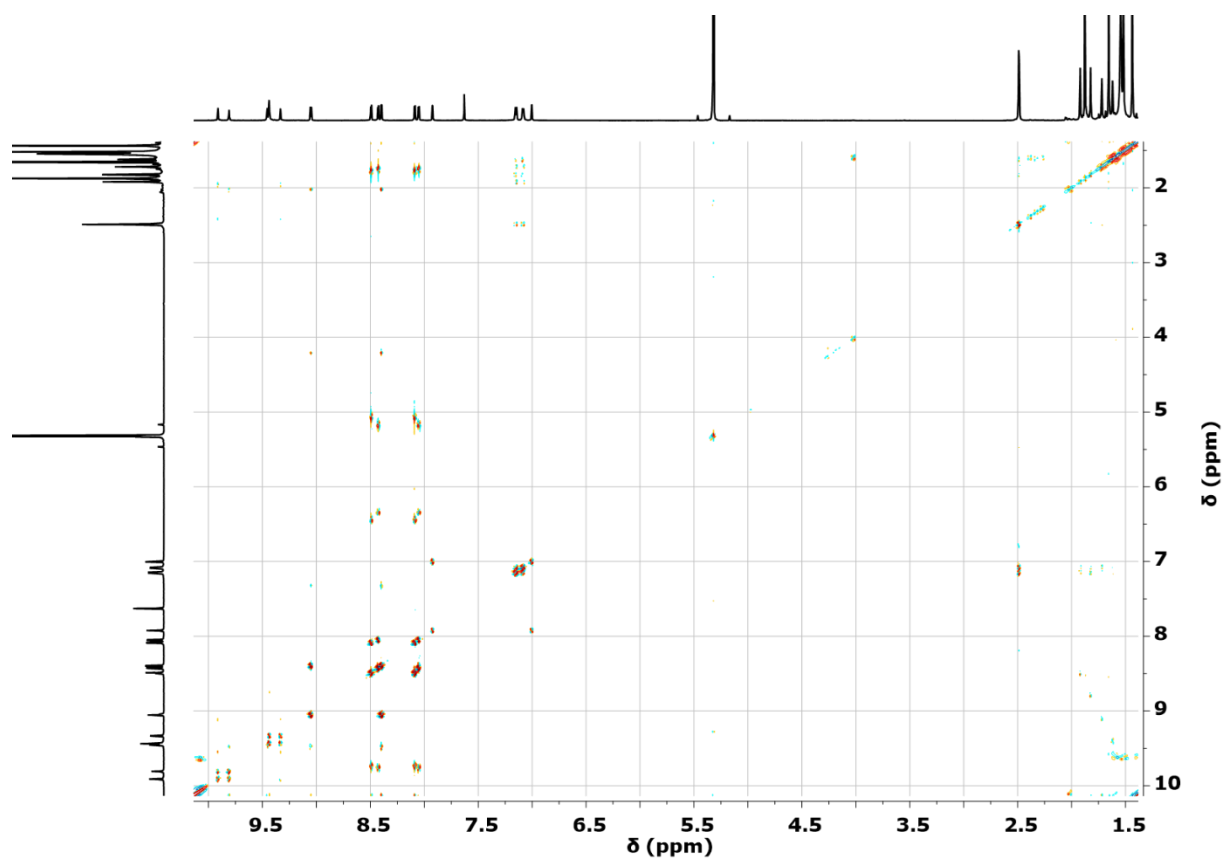

Figure S24.  $^1\text{H}$ - $^1\text{H}$  COSY of *o*-Ph.

$^1\text{H}$ - $^{13}\text{C}$  HSQC (601 MHz,  $\text{CD}_2\text{Cl}_2$ , rt)

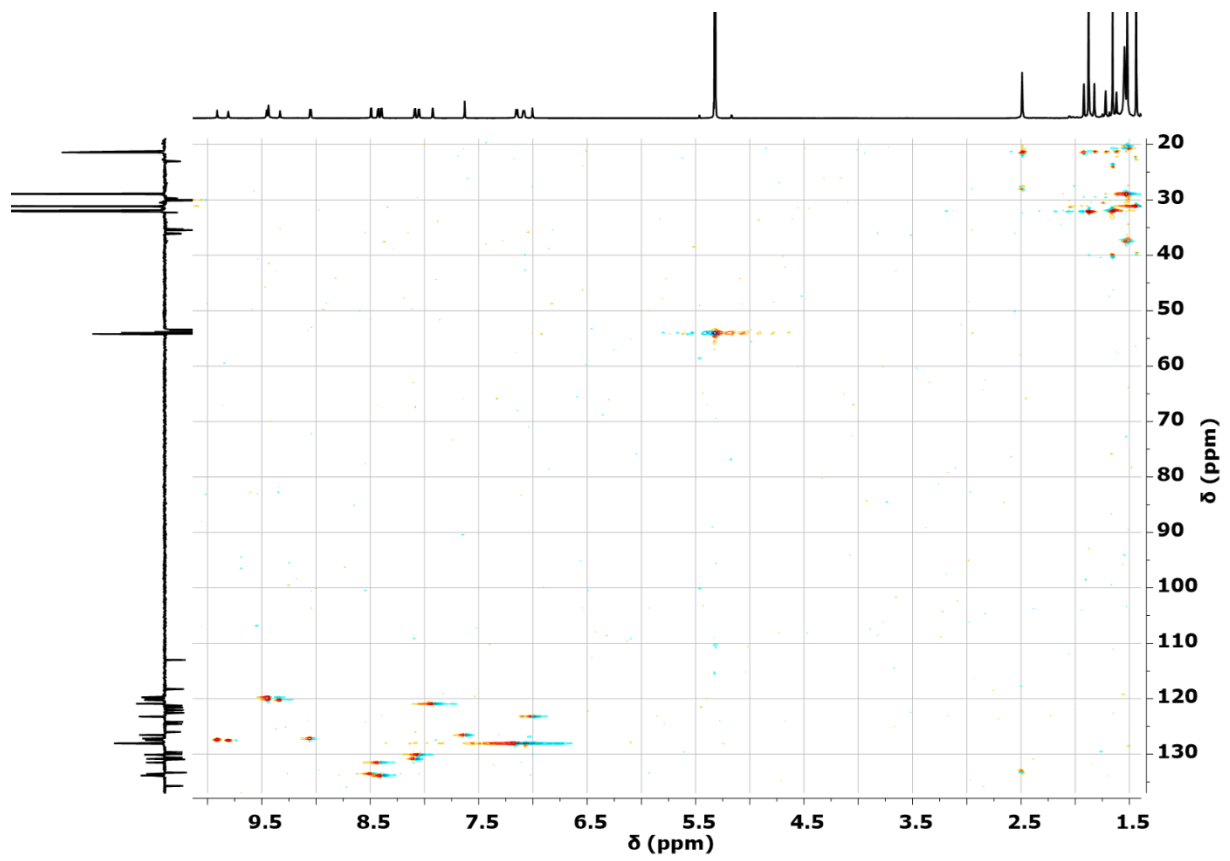

Figure S25.  $^1\text{H}$ - $^{13}\text{C}$  HSQC of **o-Ph**.

$^1\text{H}$ - $^{13}\text{C}$  HMBC (601 MHz,  $\text{CD}_2\text{Cl}_2$ , rt)

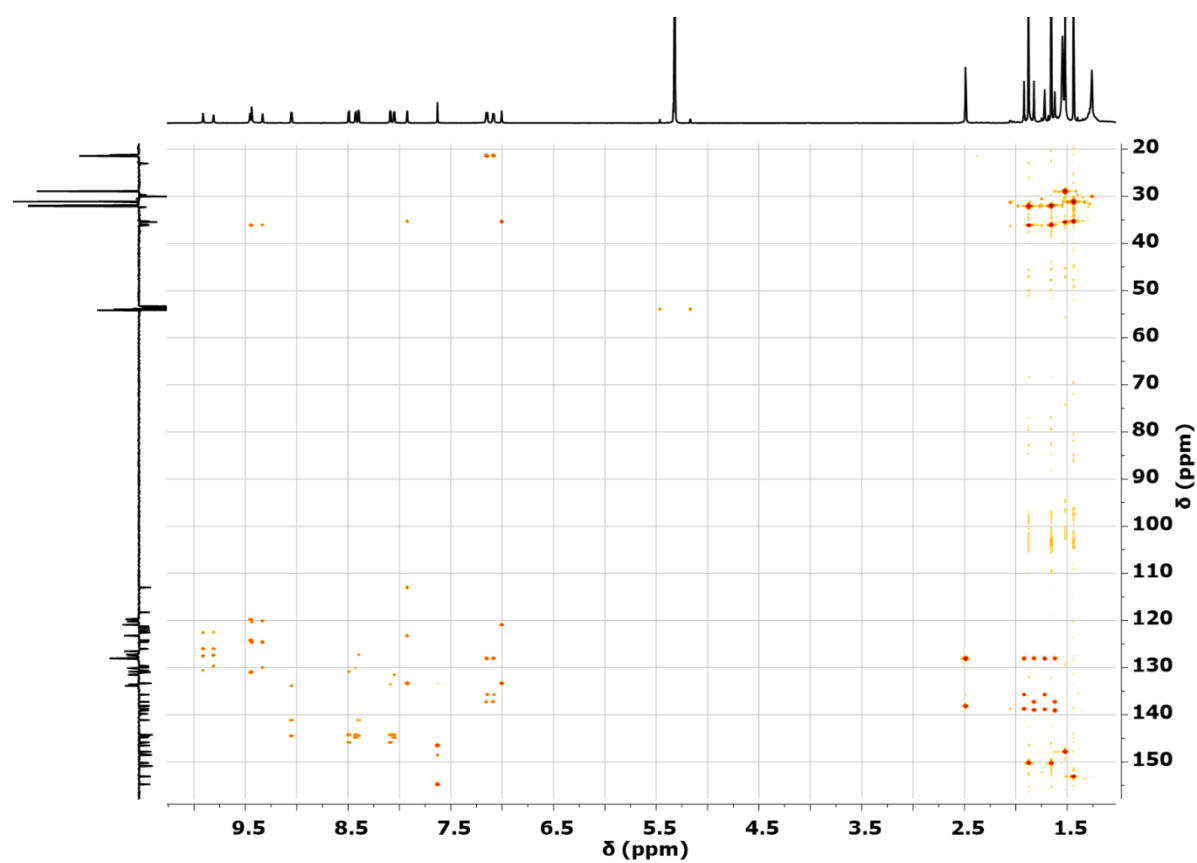

Figure S26.  $^1\text{H}$ - $^{13}\text{C}$  HMBC of *o*-Ph.

$^1\text{H}$ - $^1\text{H}$  ROESY (601 MHz,  $\text{CD}_2\text{Cl}_2$ , rt)

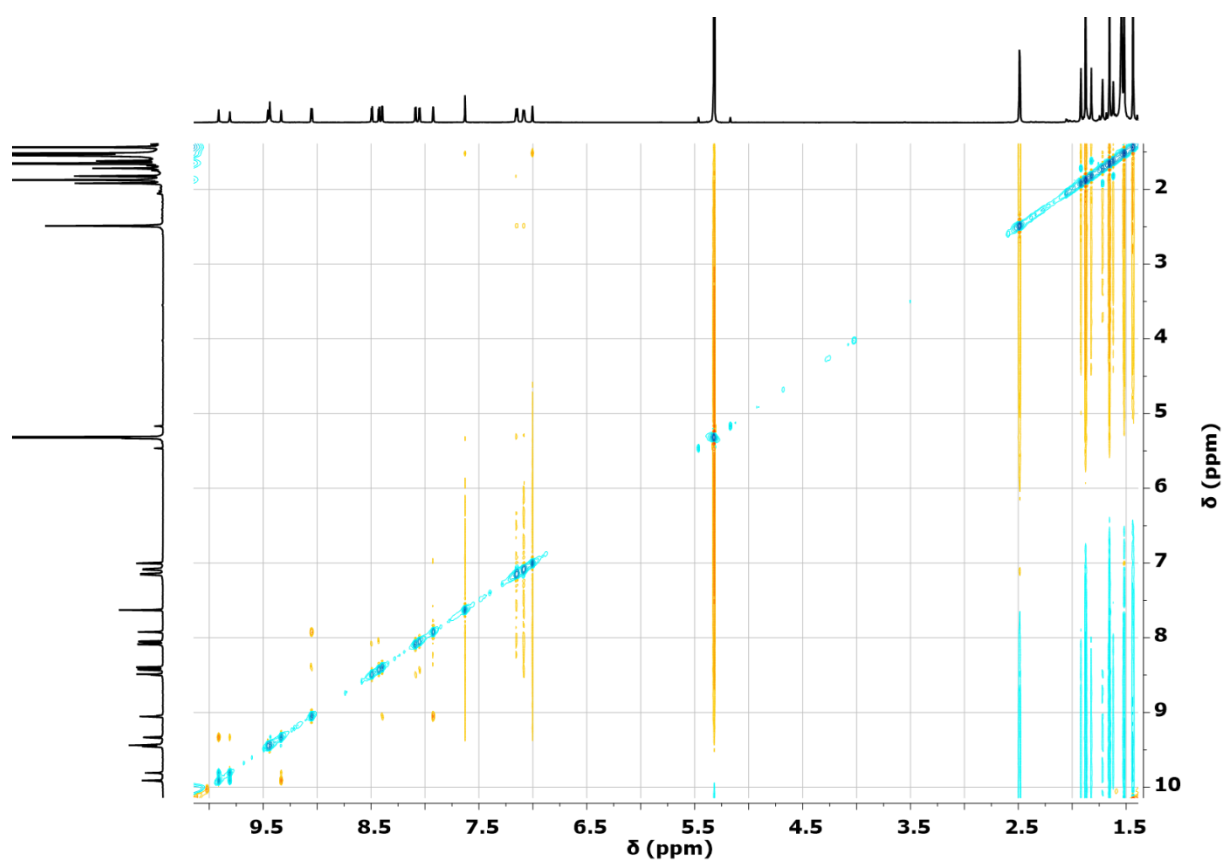

Figure S27.  $^1\text{H}$ - $^1\text{H}$  ROESY of *o*-Ph.

## MS (MALDI)

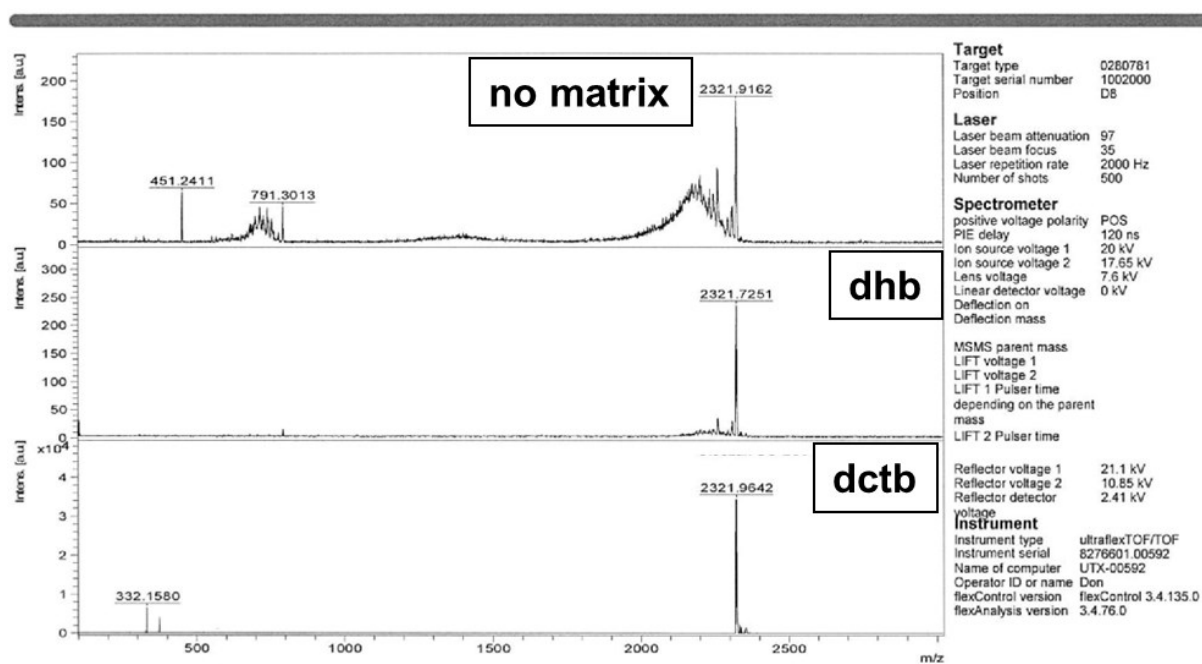

## HRMS (MALDI)

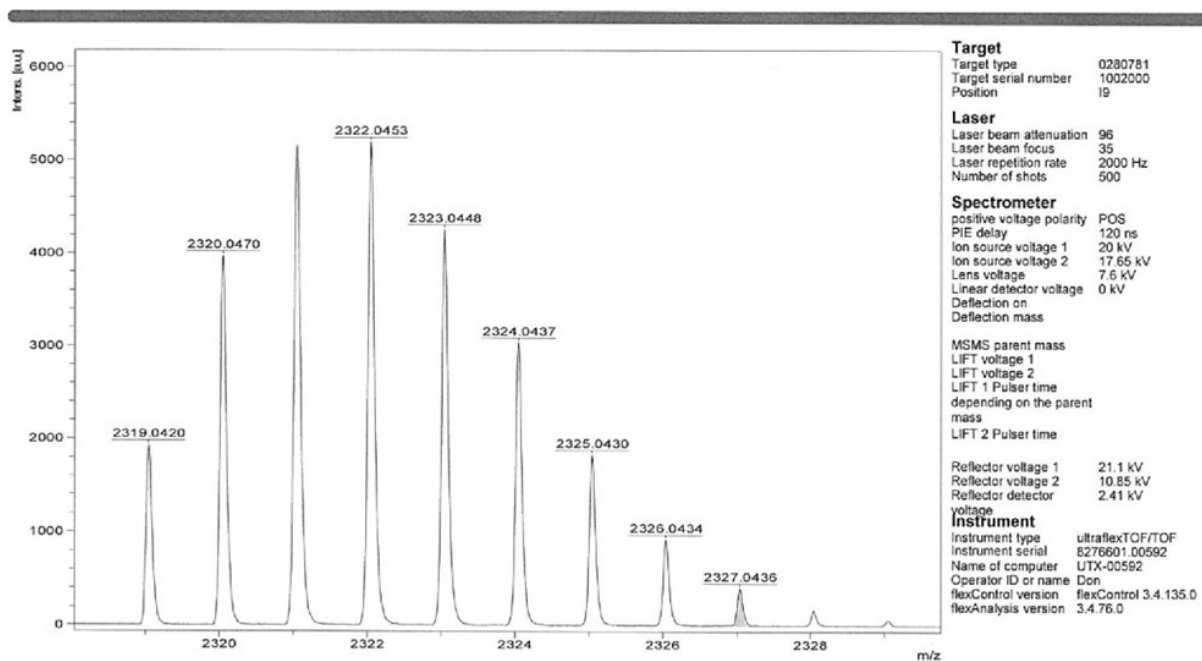

### SmartFormula

| Formula                                                          | Mass       | Error  | mSigma  | DblEq | N rule | Electron Configuration |
|------------------------------------------------------------------|------------|--------|---------|-------|--------|------------------------|
| C <sub>162</sub> H <sub>146</sub> N <sub>8</sub> Ni <sub>2</sub> | 2,319.0372 | 2.0654 | 43.6349 | 94.00 | ok     | odd                    |

Figure S28. MS/HRMS (MALDI) of *o*-Ph.

$^1\text{H}$  NMR (601 MHz,  $\text{CD}_2\text{Cl}_2$ , rt)

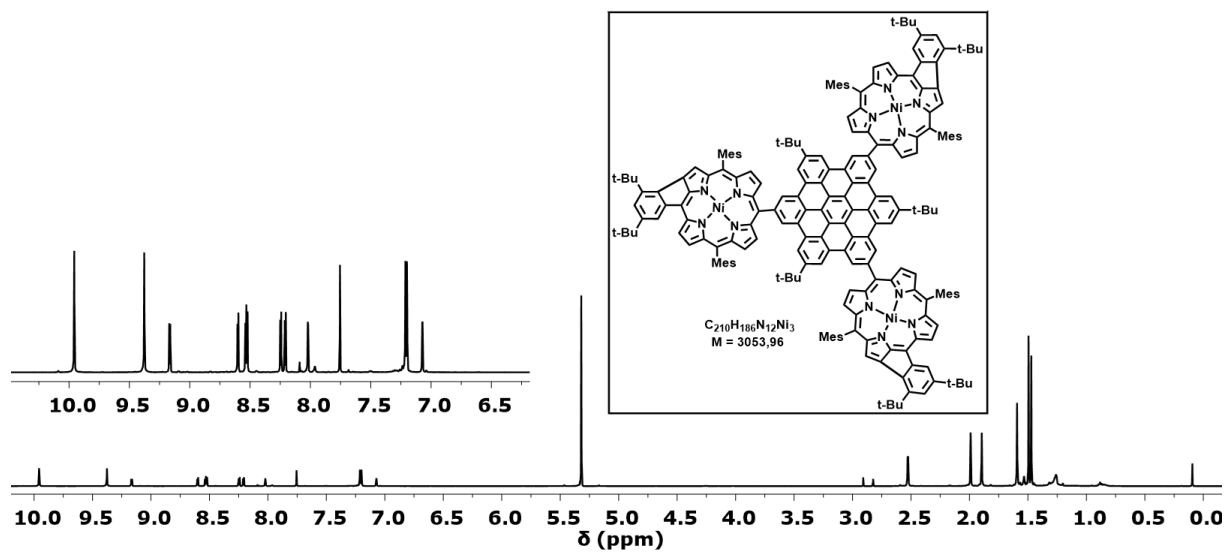

$^{13}\text{C}$  NMR - DEPTQ135 (151 MHz,  $\text{CD}_2\text{Cl}_2$ , rt)

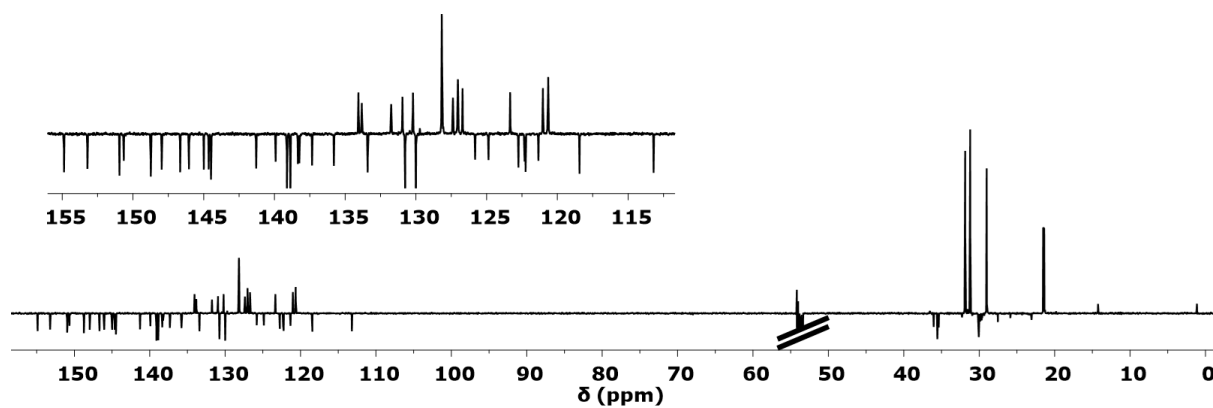

Figure S29.  $^1\text{H}$  and  $^{13}\text{C}$  NMR (DEPTQ135) of *tri-Ph*.

$^1\text{H}$ - $^1\text{H}$  COSY (601 MHz,  $\text{CD}_2\text{Cl}_2$ , rt)

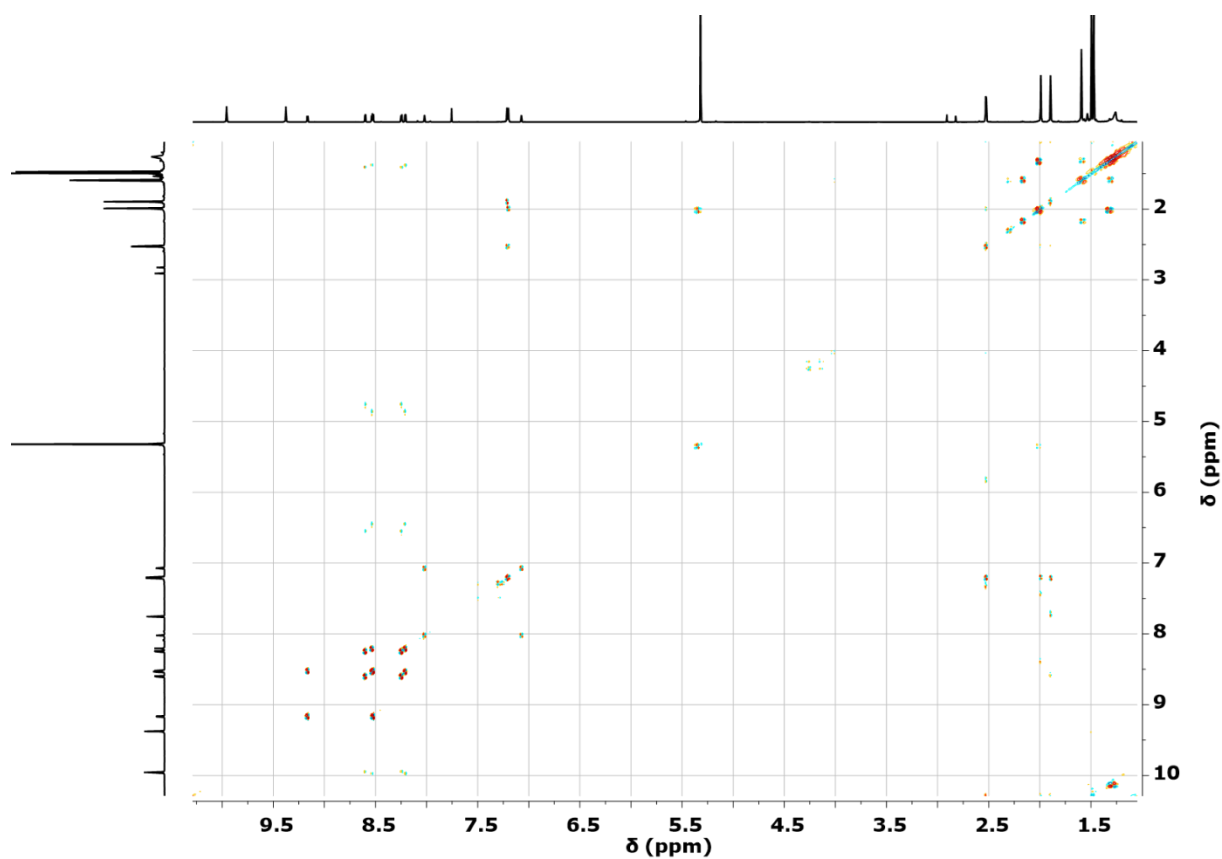

Figure S30.  $^1\text{H}$ - $^1\text{H}$  COSY of *tri-Ph*.



$^1\text{H}$ - $^{13}\text{C}$  HSQC (601 MHz,  $\text{CD}_2\text{Cl}_2$ , rt)

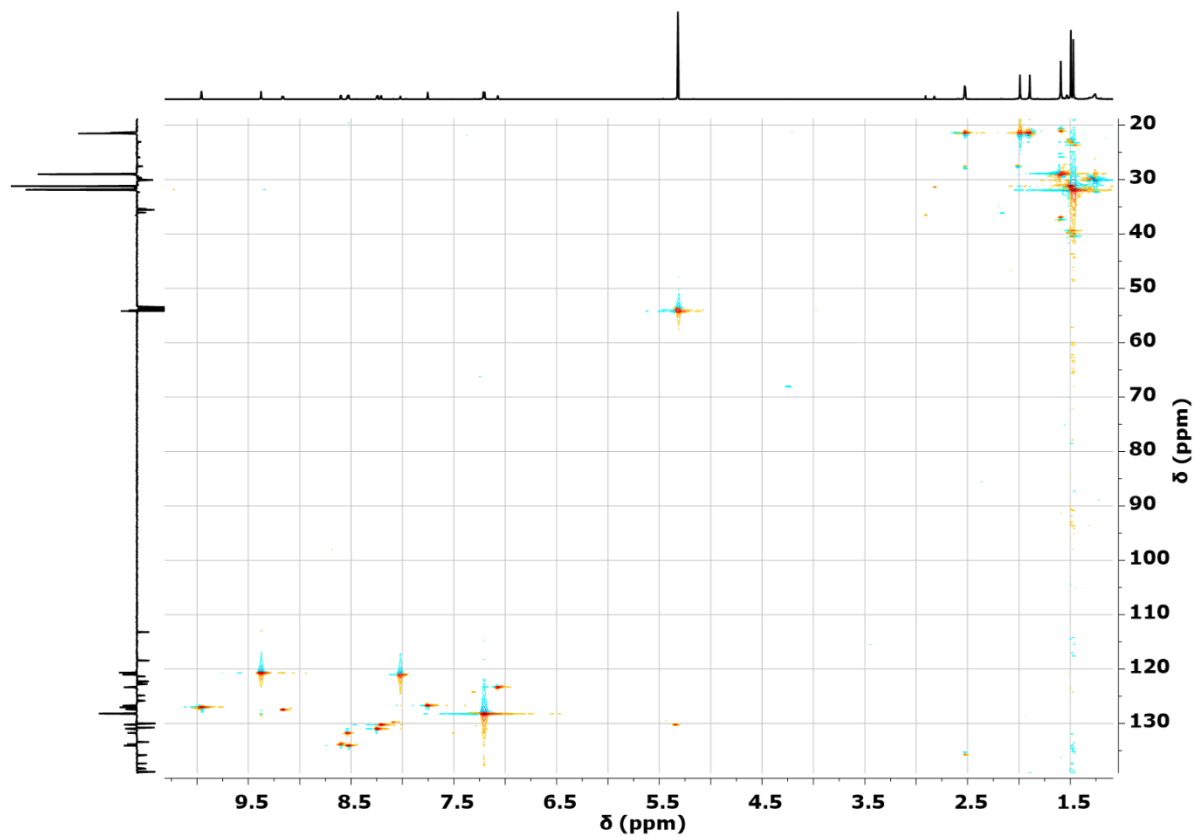

Figure S31.  $^1\text{H}$ - $^{13}\text{C}$  HSQC of *tri*-Ph.

$^1\text{H}$ - $^{13}\text{C}$  HMBC (601 MHz,  $\text{CD}_2\text{Cl}_2$ , rt)

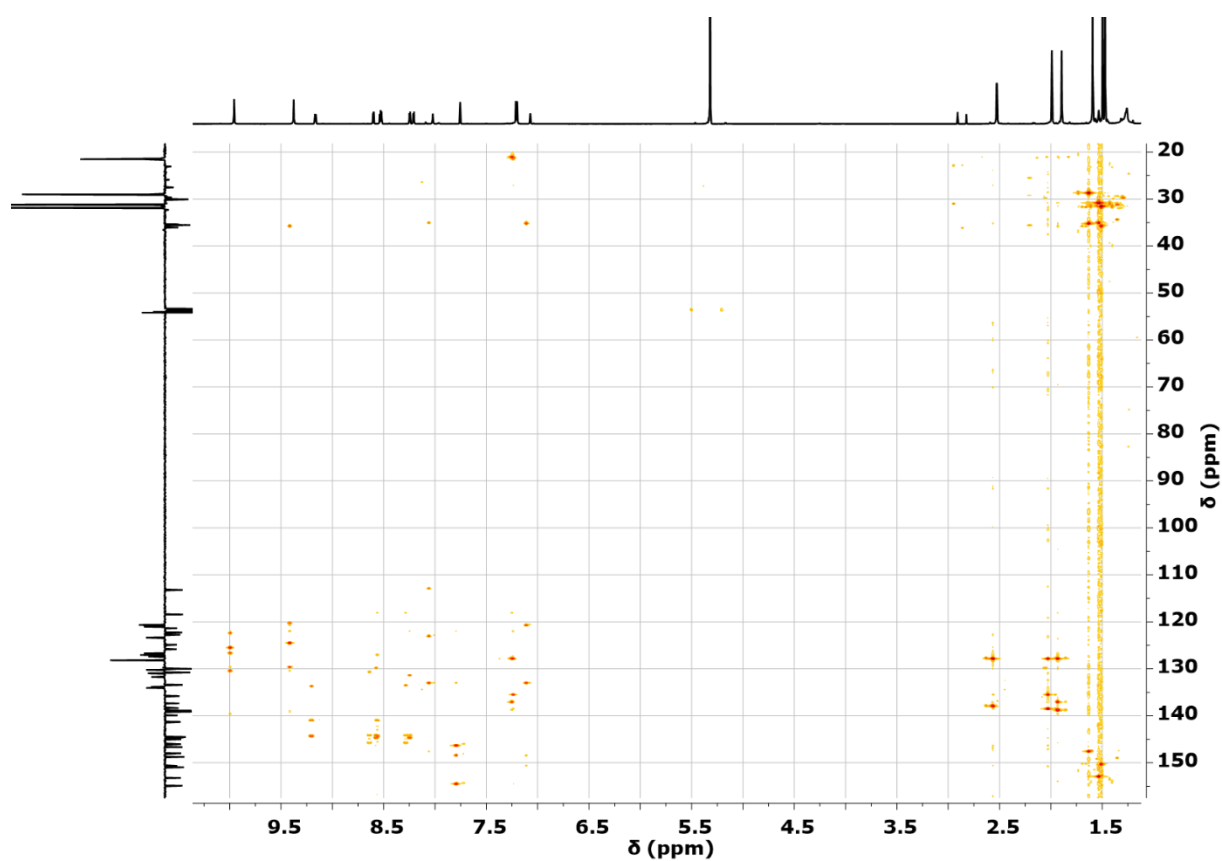

Figure S32.  $^1\text{H}$ - $^{13}\text{C}$  HMBC of *tri*-Ph.

$^1\text{H}$ - $^1\text{H}$  ROESY (601 MHz,  $\text{CD}_2\text{Cl}_2$ , rt)

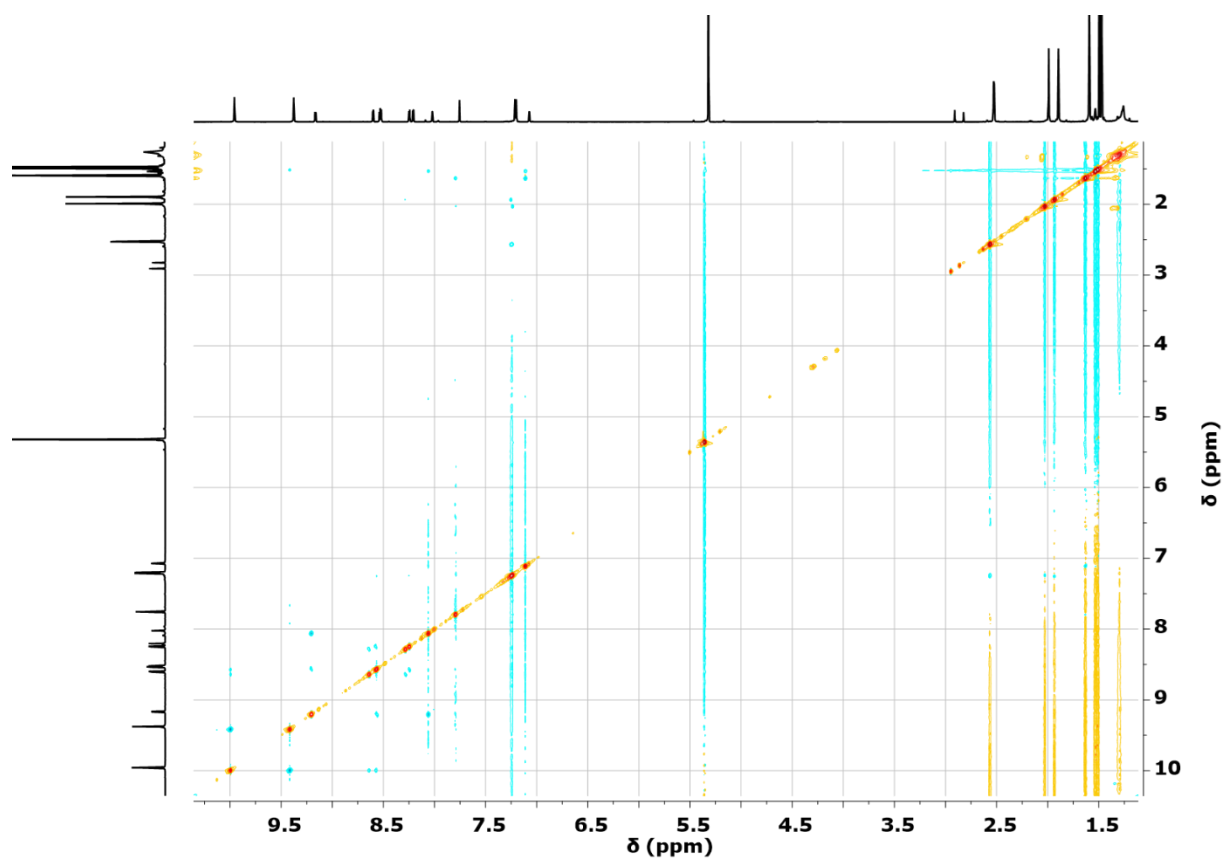

Figure S33.  $^1\text{H}$ - $^1\text{H}$  ROESY of *tri-Ph*.

## MS (MALDI)

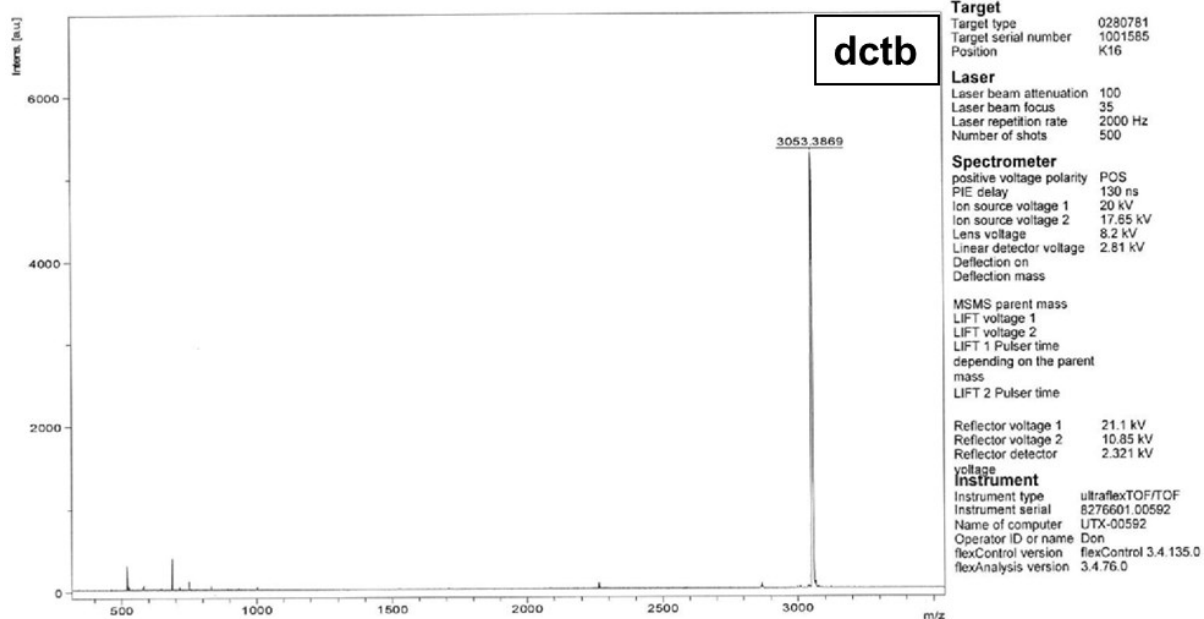

## HRMS (MALDI)

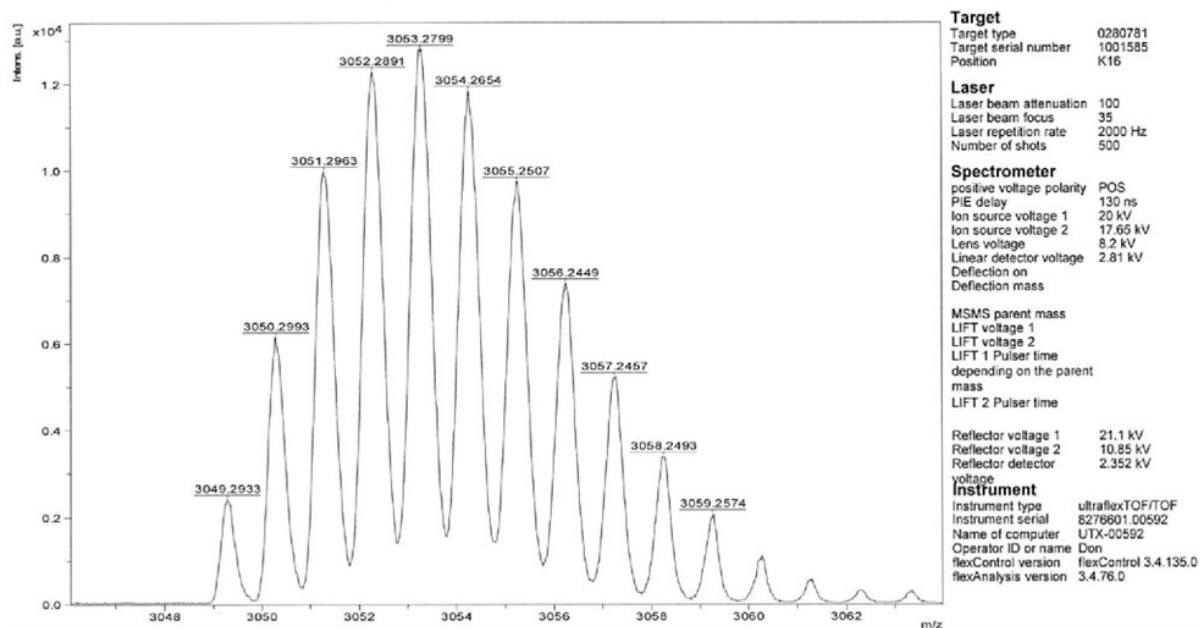

### SmartFormula

| Formula                     | Mass       | Error  | mSigma  | DbIEq  | N rule | Electron Configuration |
|-----------------------------|------------|--------|---------|--------|--------|------------------------|
| C 210 H<br>186 N 12<br>Ni 3 | 3,049.2978 | 1.4948 | 34.4860 | 124.00 | ok     | odd                    |

Figure S34. MS/HRMS (MALDI) of *tri*-Ph.

$^1\text{H}$  NMR (400 MHz,  $\text{CDCl}_3$ , rt)

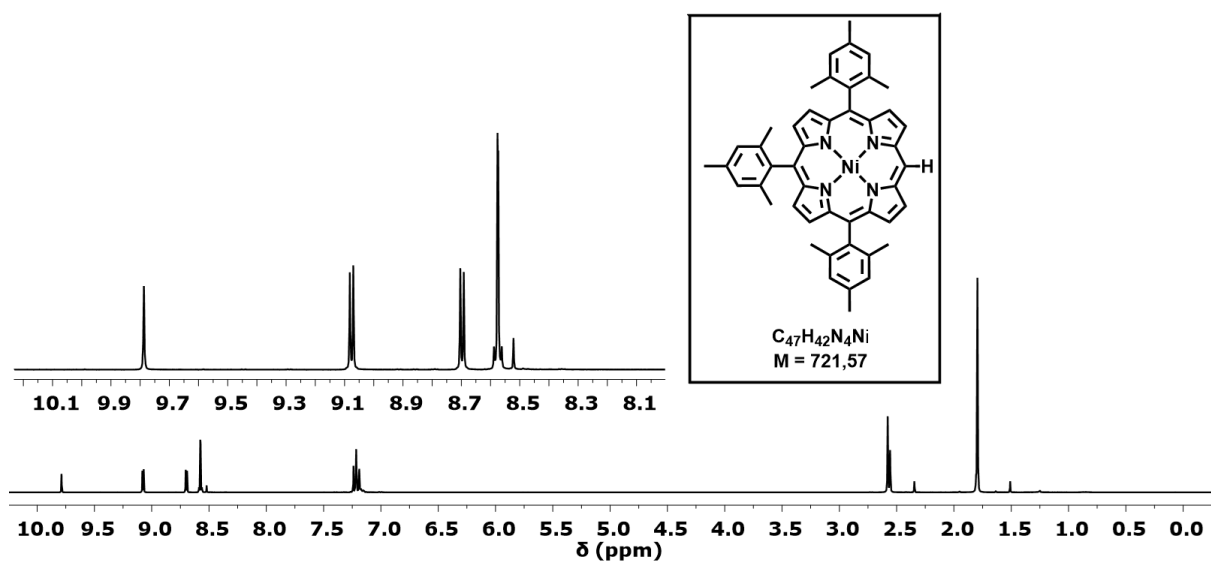

$^{13}\text{C}$  NMR (101 MHz,  $\text{CDCl}_3$ , rt)

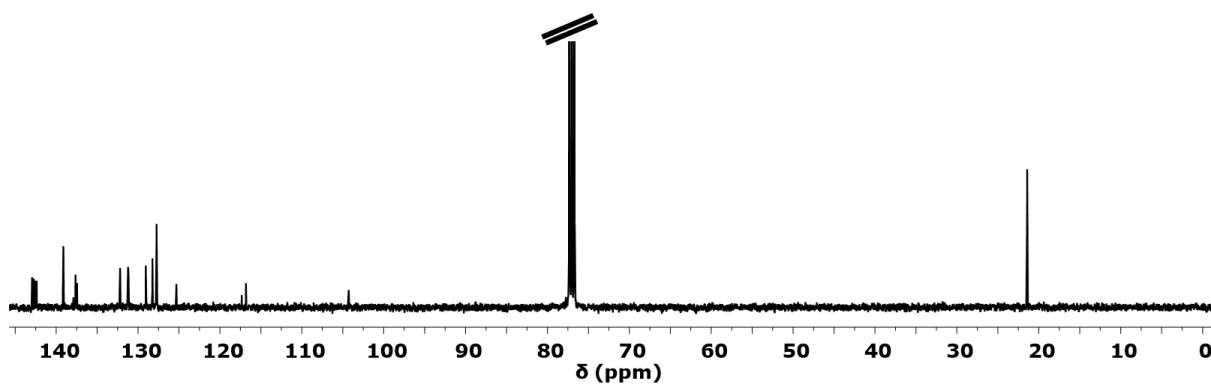

Figure S35.  $^1\text{H}$  and  $^{13}\text{C}$  NMR of 21.

## MS (MALDI)

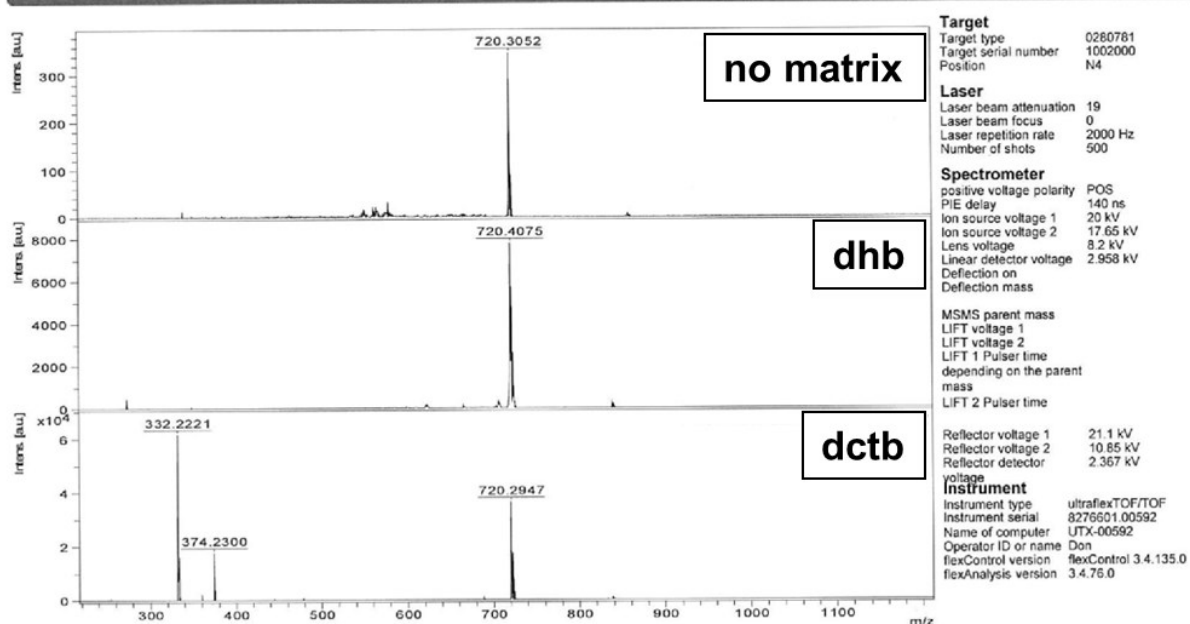

## HRMS (MALDI)

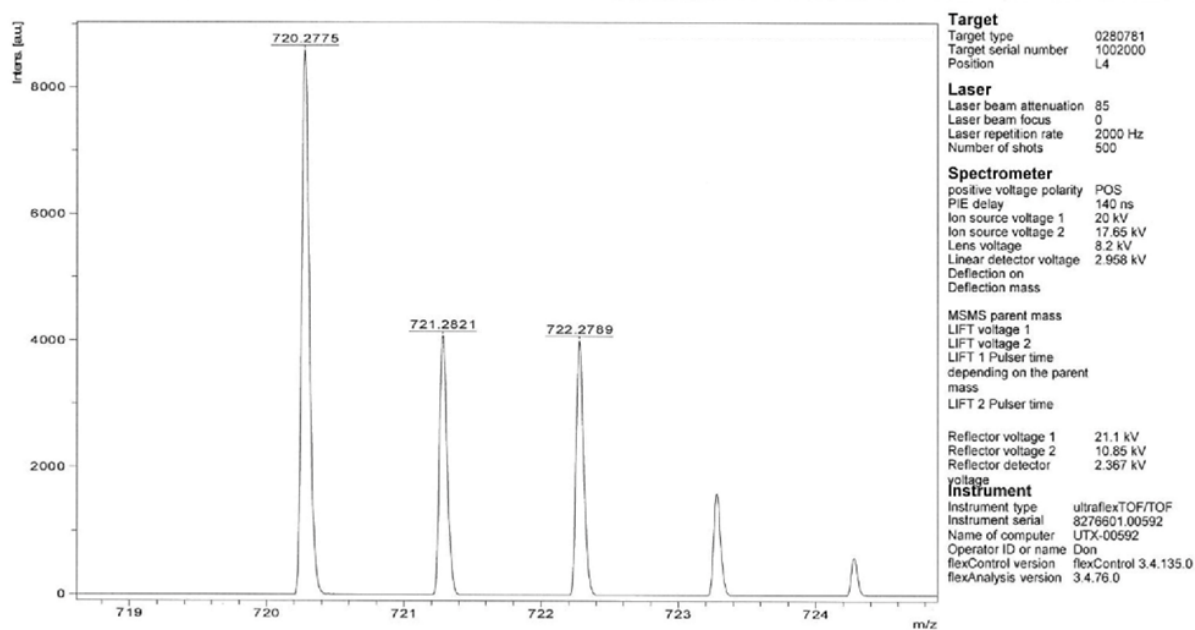

## SmartFormula

| Formula                                              | Mass     | Error  | mSigma   | DblEq | N rule | Electron Configuration |
|------------------------------------------------------|----------|--------|----------|-------|--------|------------------------|
| C <sub>47</sub> H <sub>42</sub><br>N <sub>4</sub> Ni | 720.2757 | 2.3975 | 100.6242 | 29.00 | ok     | odd                    |

Figure S36. MS/HRMS (MALDI) of 21.

$^1\text{H}$  NMR (400 MHz,  $\text{CDCl}_3$ , rt)

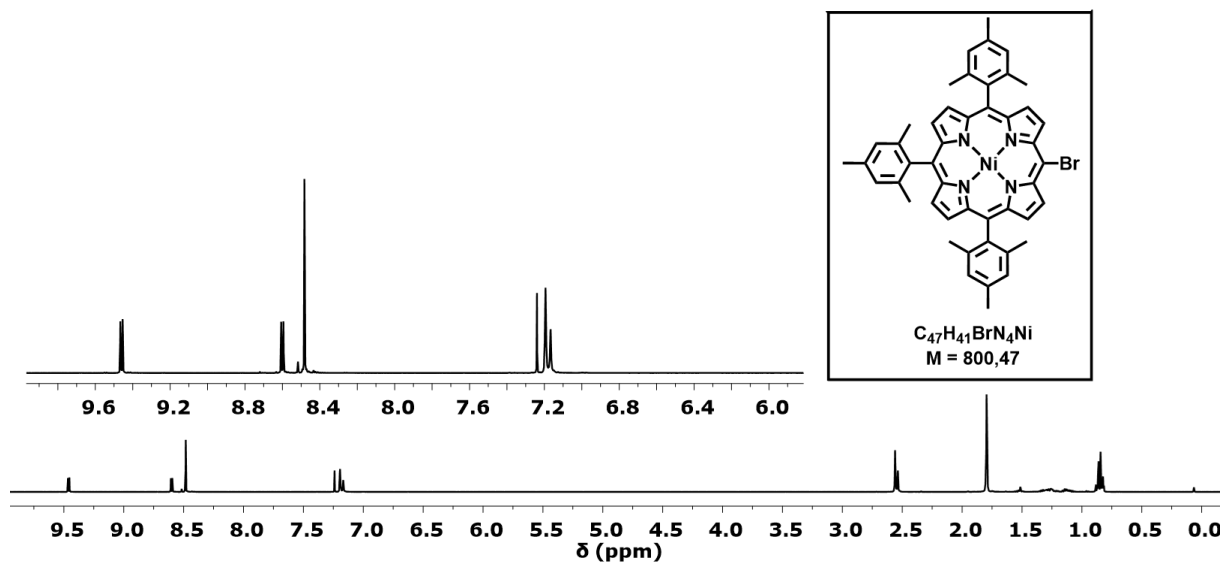

$^{13}\text{C}$  NMR (101 MHz,  $\text{CDCl}_3$ , rt)

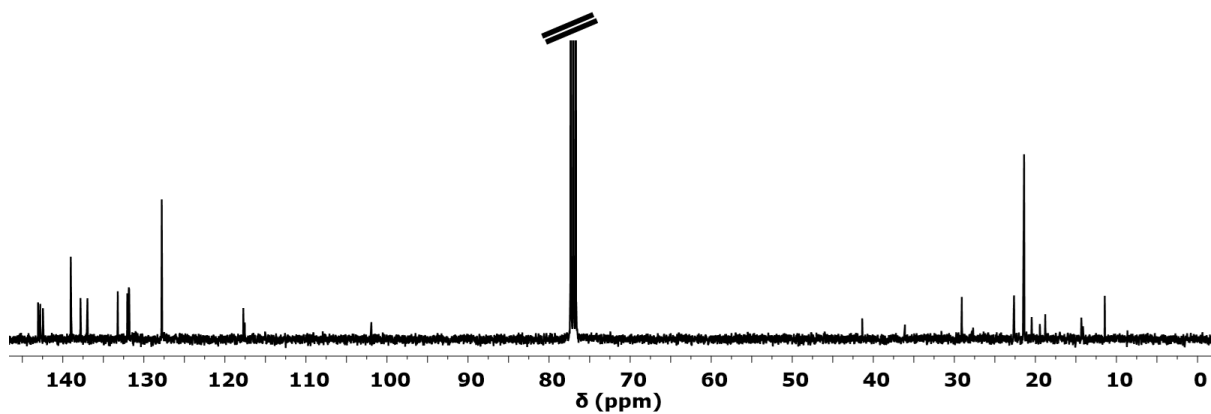

Figure S37.  $^1\text{H}$  and  $^{13}\text{C}$  NMR of 22.

## MS (MALDI)

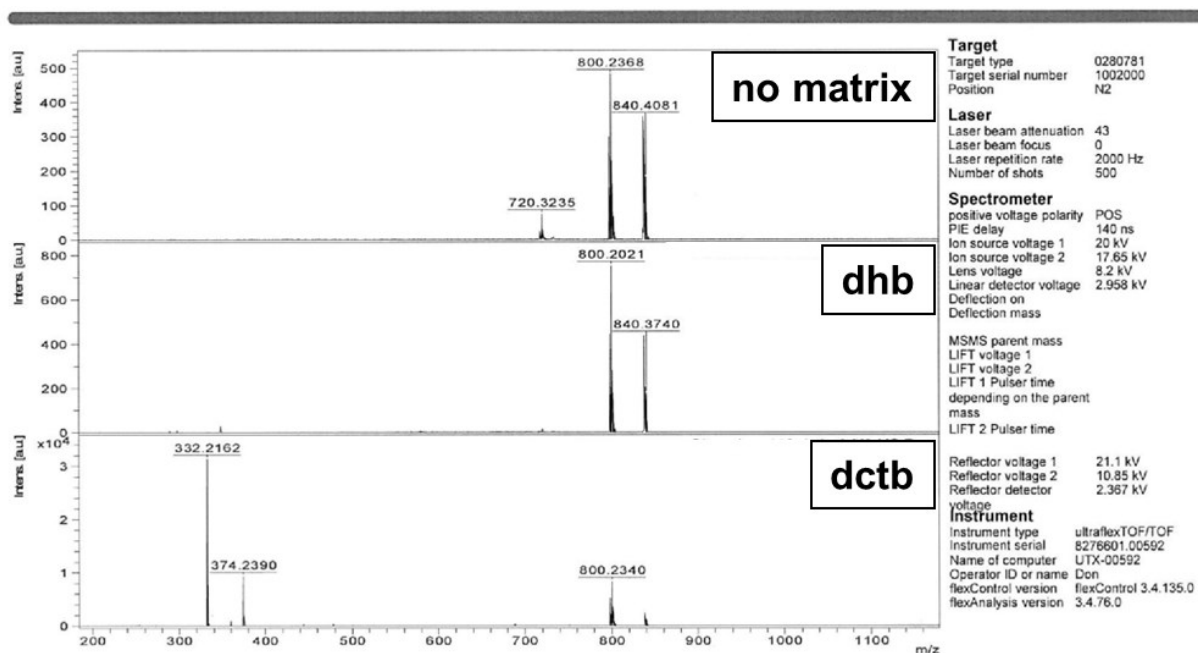

## HRMS (MALDI)

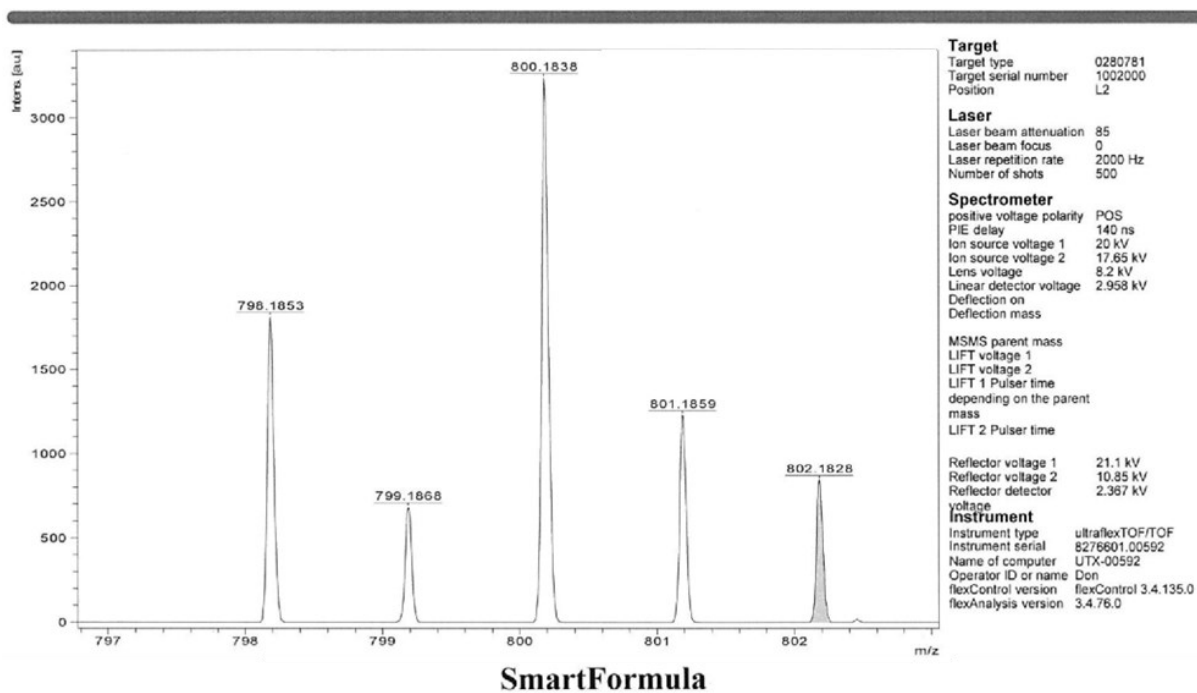

### SmartFormula

| Formula                | Mass     | Error  | mSigma   | DblEq | N rule | Electron Configuration |
|------------------------|----------|--------|----------|-------|--------|------------------------|
| C 47 H 41<br>Br N 4 Ni | 798.1863 | 1.1747 | 247.2498 | 29.00 | ok     | odd                    |

Figure S38. MS/HRMS (MALDI) of **22**.



$^1\text{H}$  NMR (400 MHz,  $\text{CDCl}_3$ , rt)

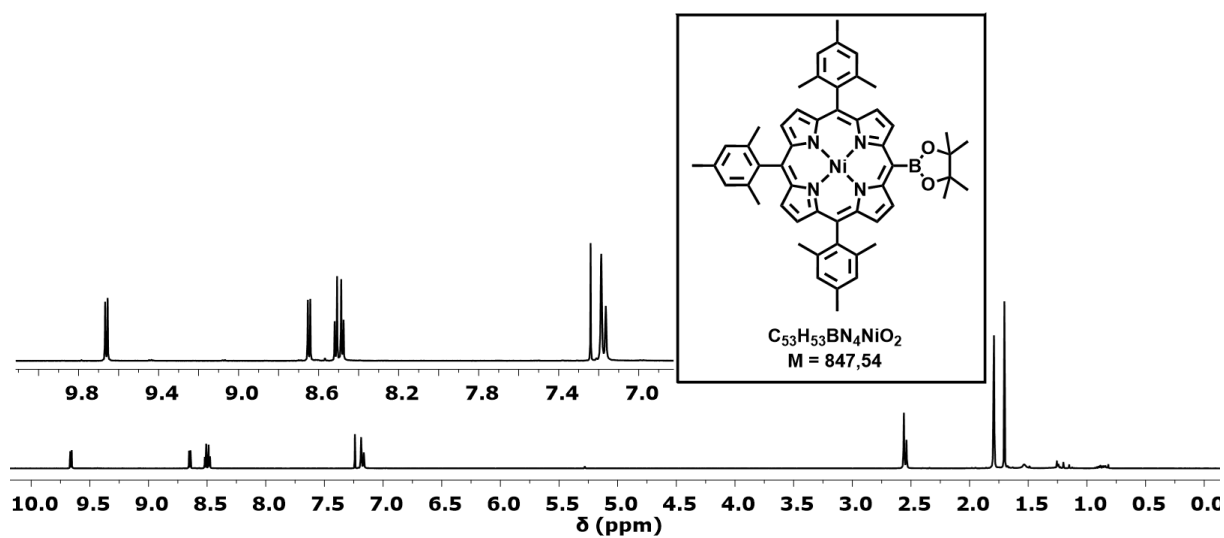

$^{13}\text{C}$  NMR (101 MHz,  $\text{CDCl}_3$ , rt)

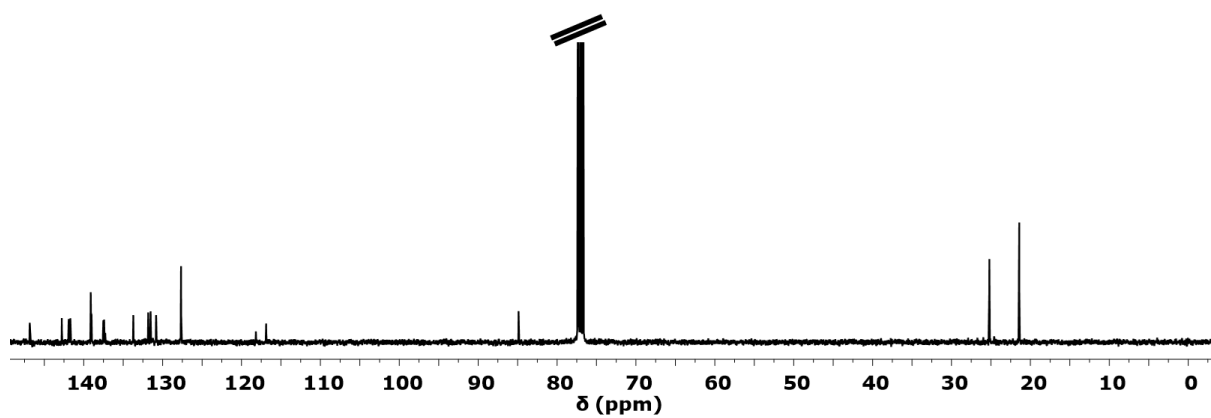

Figure S39.  $^1\text{H}$  and  $^{13}\text{C}$  NMR of 10.

## MS (MALDI)

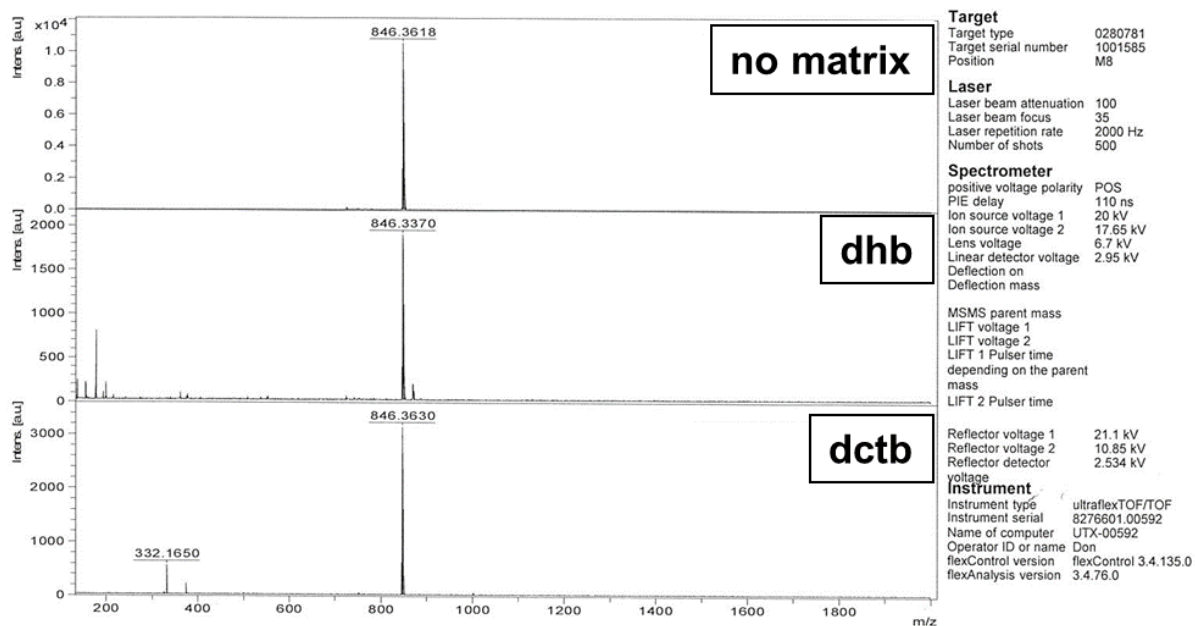

## HRMS (MALDI)

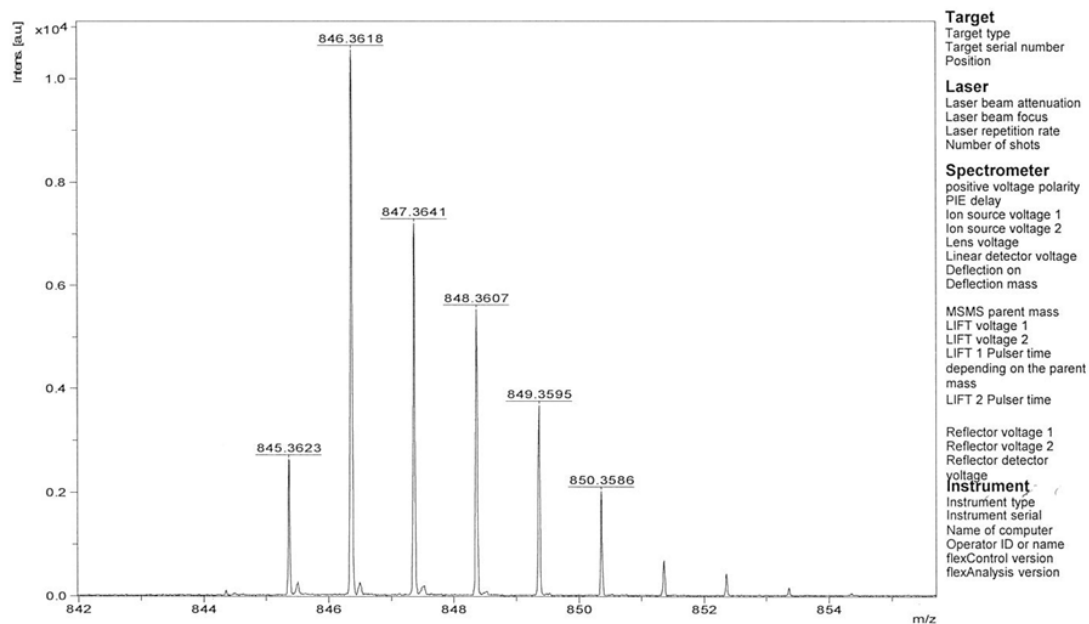

## SmartFormula

| Formula                      | Mass     | Error  | mSigma  | DbIEq | N rule | Electron Configuration |
|------------------------------|----------|--------|---------|-------|--------|------------------------|
| C 53 H 53<br>B N 4 Ni<br>O 2 | 846.3610 | 1.0248 | 42.1791 | 30.00 | ok     | odd                    |

Figure S40. MS/HRMS (MALDI) of 10.

$^1\text{H}$  NMR (400 MHz,  $\text{CDCl}_3$ , rt)

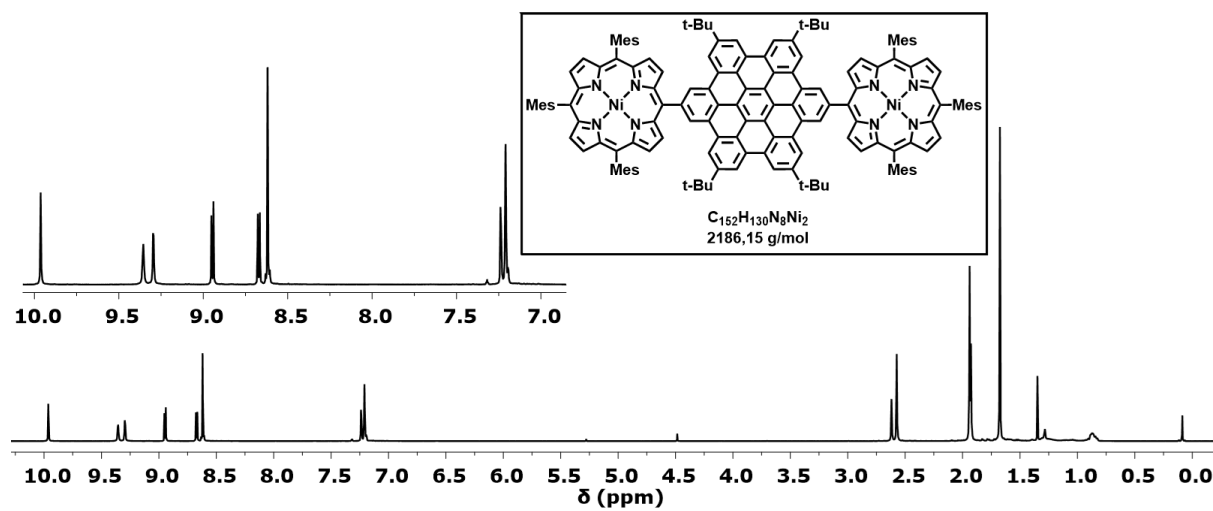

$^{13}\text{C}$  NMR (101 MHz,  $\text{CDCl}_3$ , rt)

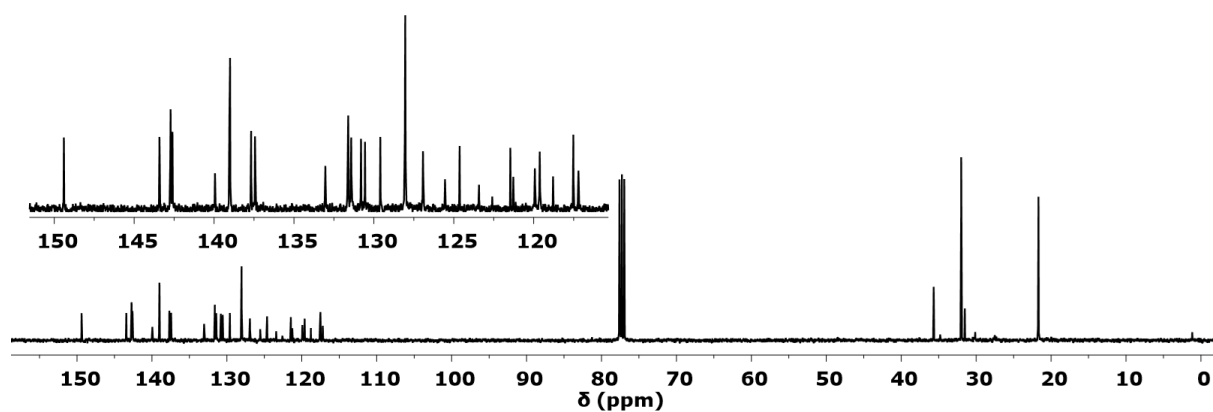

Figure S41.  $^1\text{H}$  and  $^{13}\text{C}$  NMR of 12.

## MS (MALDI)

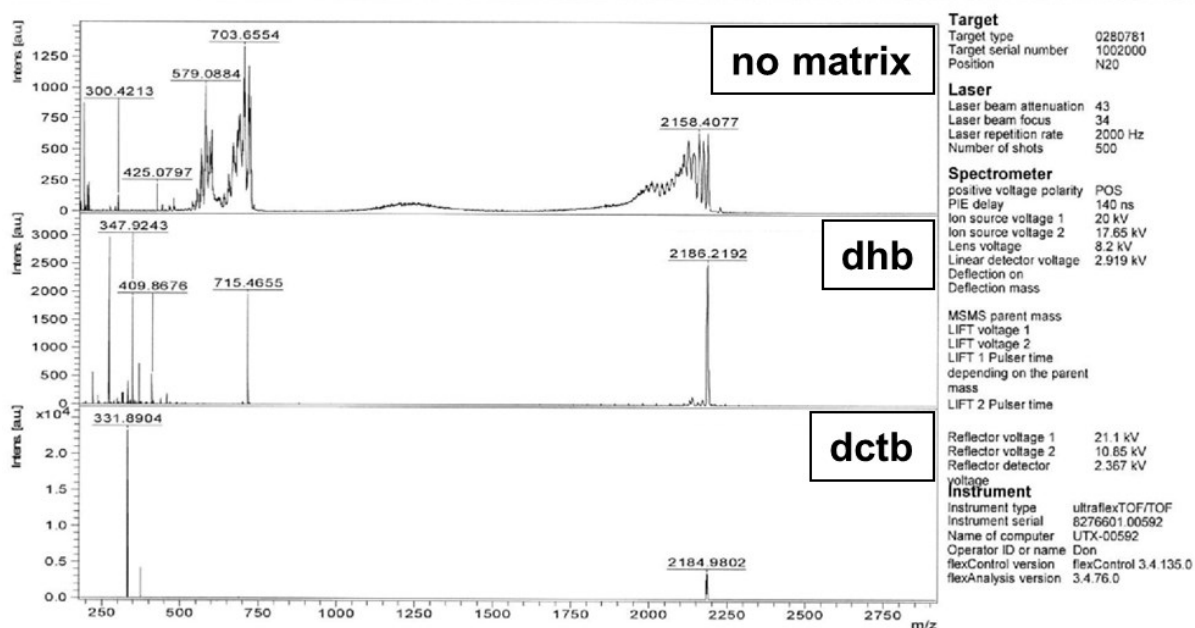

## HRMS (MALDI)

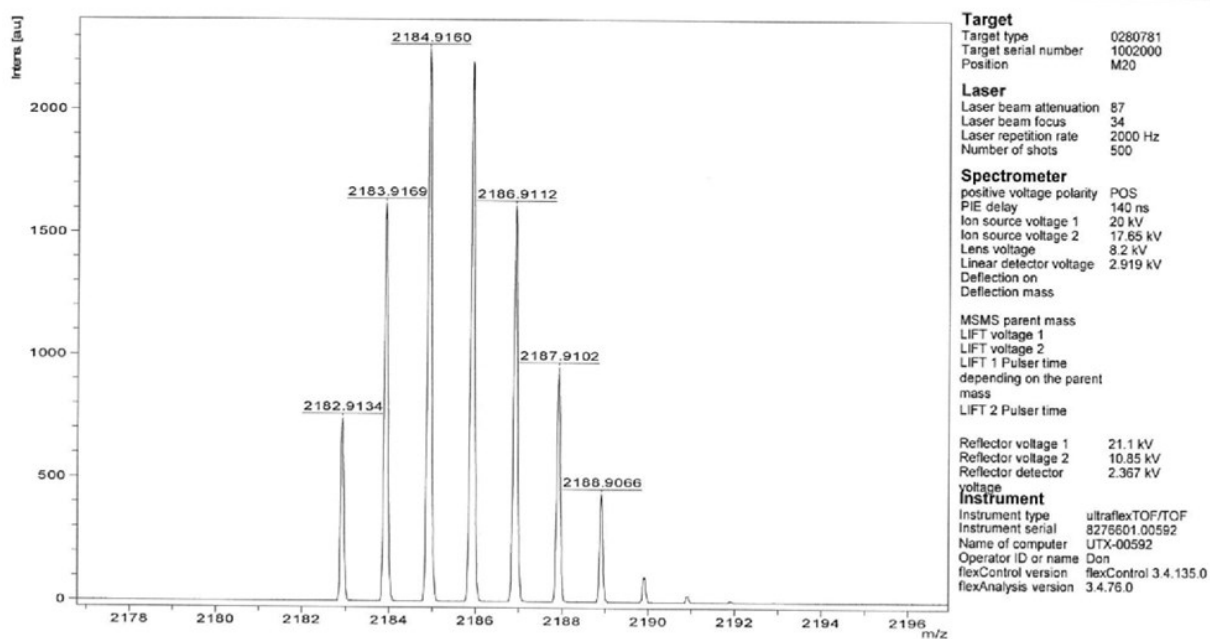

## SmartFormula

| Formula                    | Mass       | Error  | mSigma  | DblEq | N rule | Electron Configuration |
|----------------------------|------------|--------|---------|-------|--------|------------------------|
| C 152 H<br>130 N 8 Ni<br>2 | 2,182.9120 | 0.6437 | 95.6119 | 92.00 | ok     | odd                    |

Figure S42. MS/HRMS (MALDI) of 12.

$^1\text{H}$  NMR (400 MHz,  $\text{CDCl}_3$ , rt)

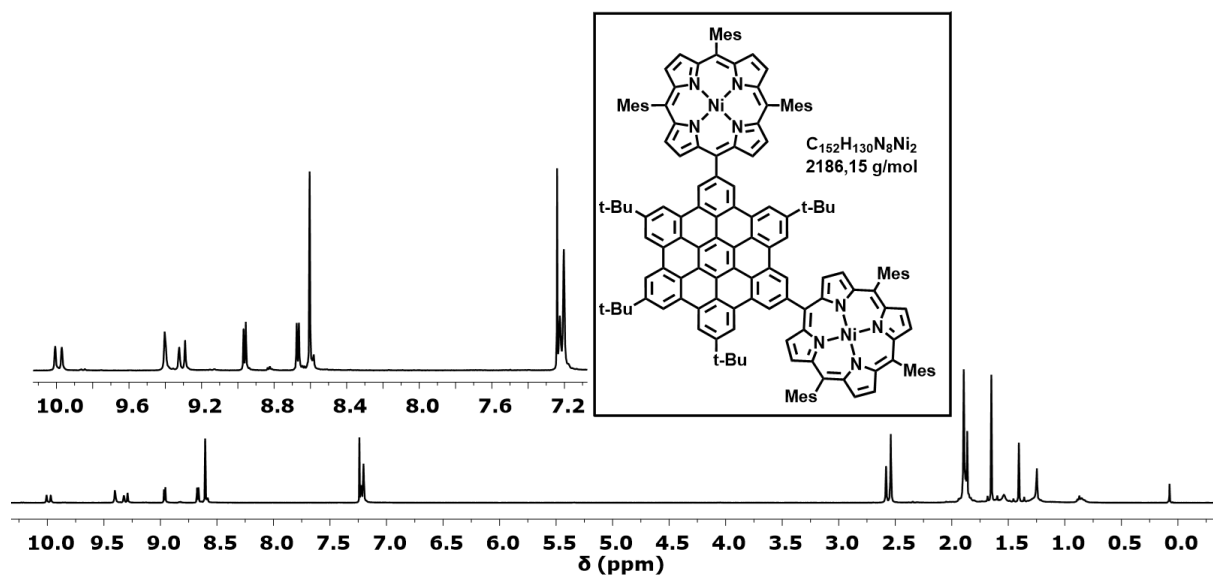

$^{13}\text{C}$  NMR (101 MHz,  $\text{CDCl}_3$ , rt)

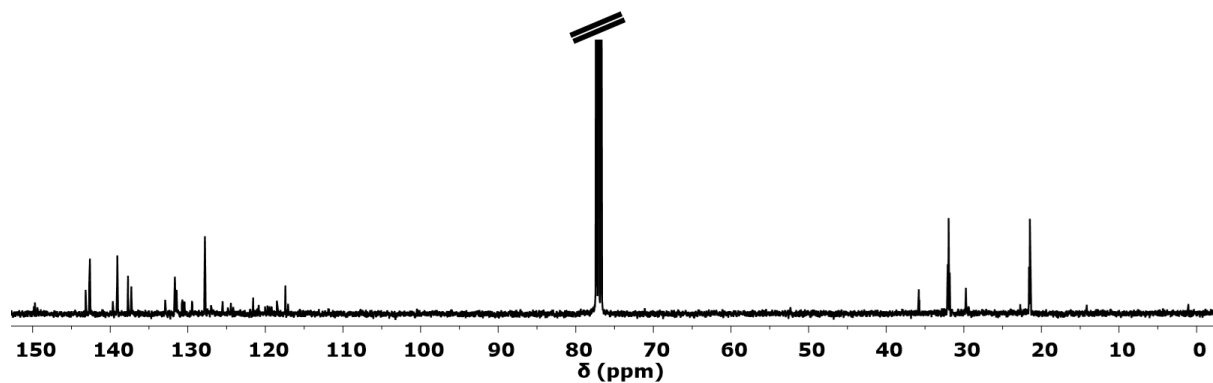

Figure S43.  $^1\text{H}$  and  $^{13}\text{C}$  NMR of 13.

## MS (MALDI)

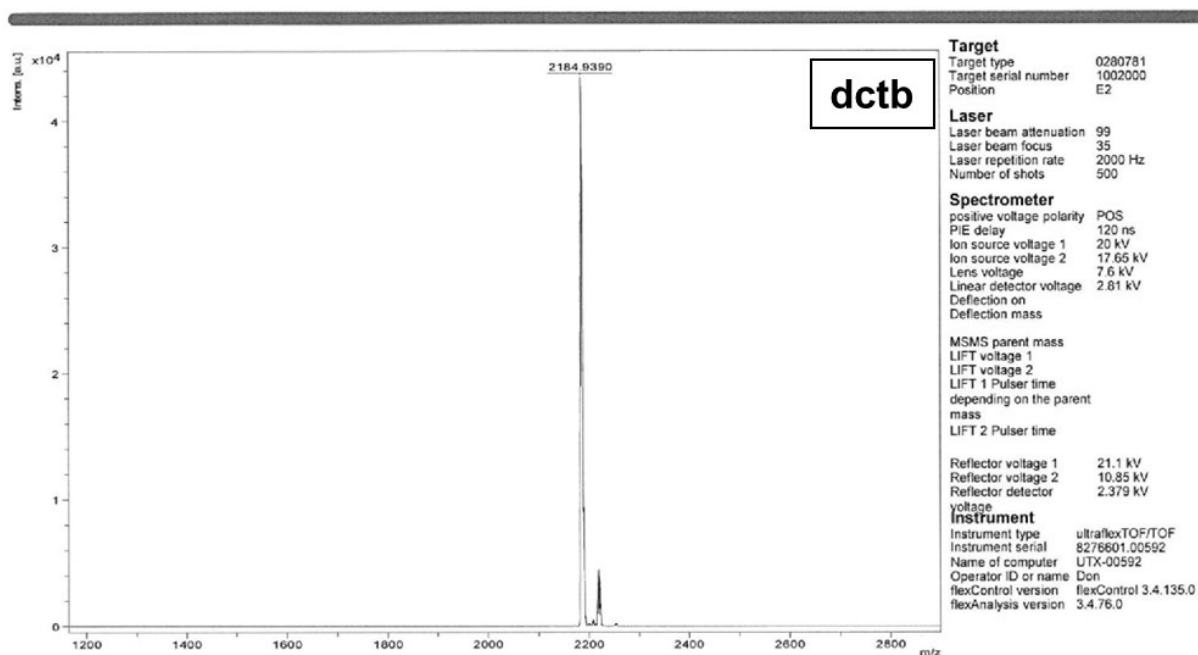

## HRMS (MALDI)

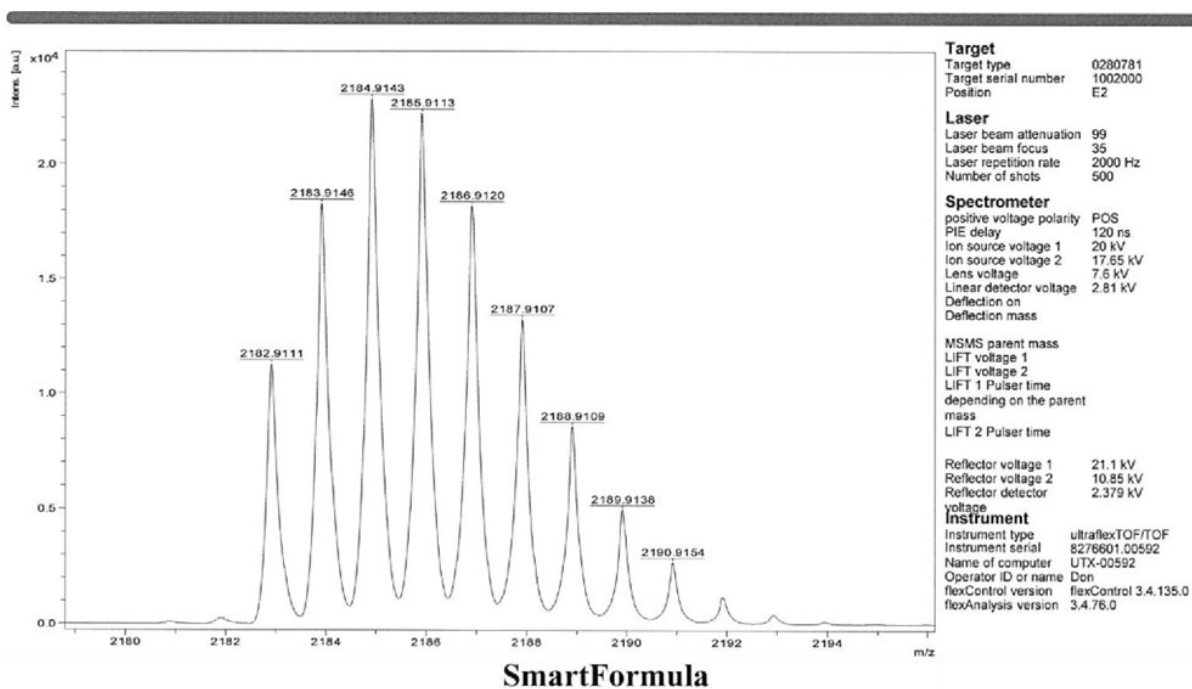

### SmartFormula

| Formula                                                          | Mass       | Error  | mSigma  | DbIEq | N rule | Electron Configuration |
|------------------------------------------------------------------|------------|--------|---------|-------|--------|------------------------|
| C <sub>152</sub> H <sub>130</sub> N <sub>8</sub> Ni <sub>2</sub> | 2,182.9120 | 0.3975 | 24.5868 | 92.00 | ok     | odd                    |

Figure S44. MS/HRMS (MALDI) of 13.

$^1\text{H}$  NMR (400 MHz,  $\text{CDCl}_3$ , rt)

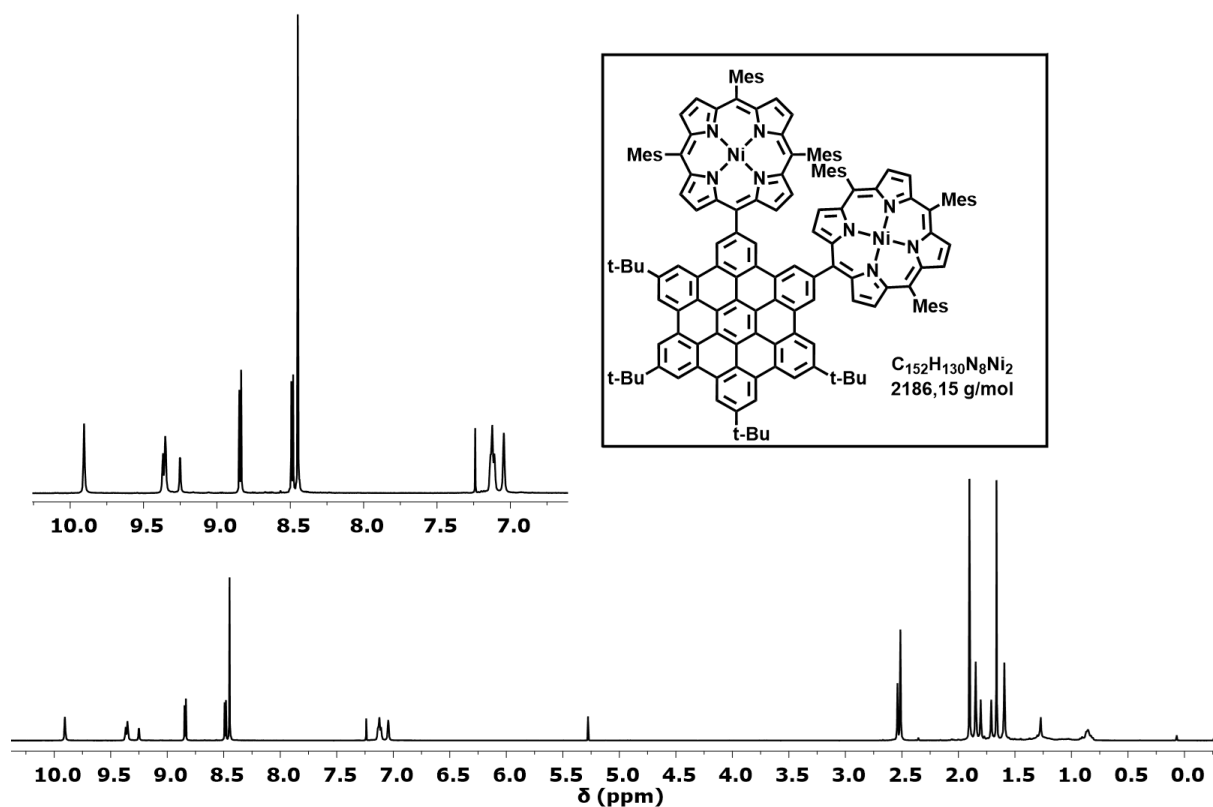

$^{13}\text{C}$  NMR (101 MHz,  $\text{CDCl}_3$ , rt)

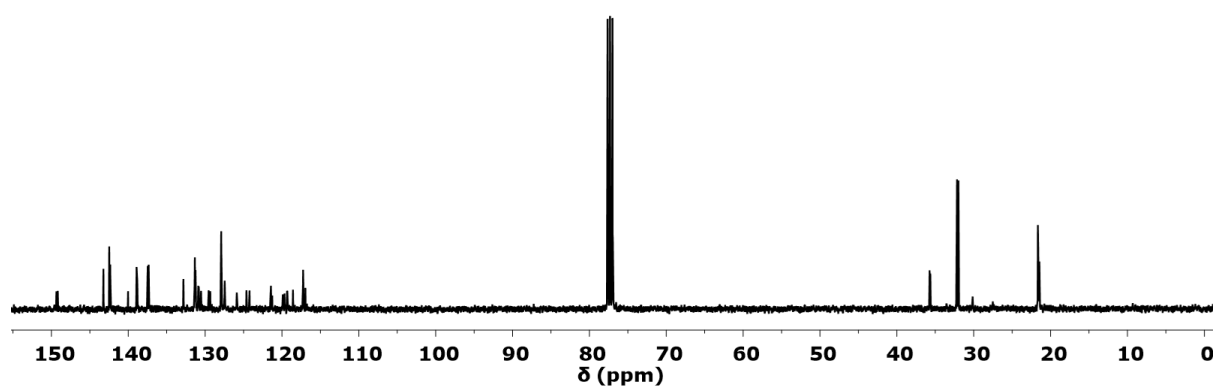

Figure S45.  $^1\text{H}$  and  $^{13}\text{C}$  NMR of 11.

## MS (MALDI)

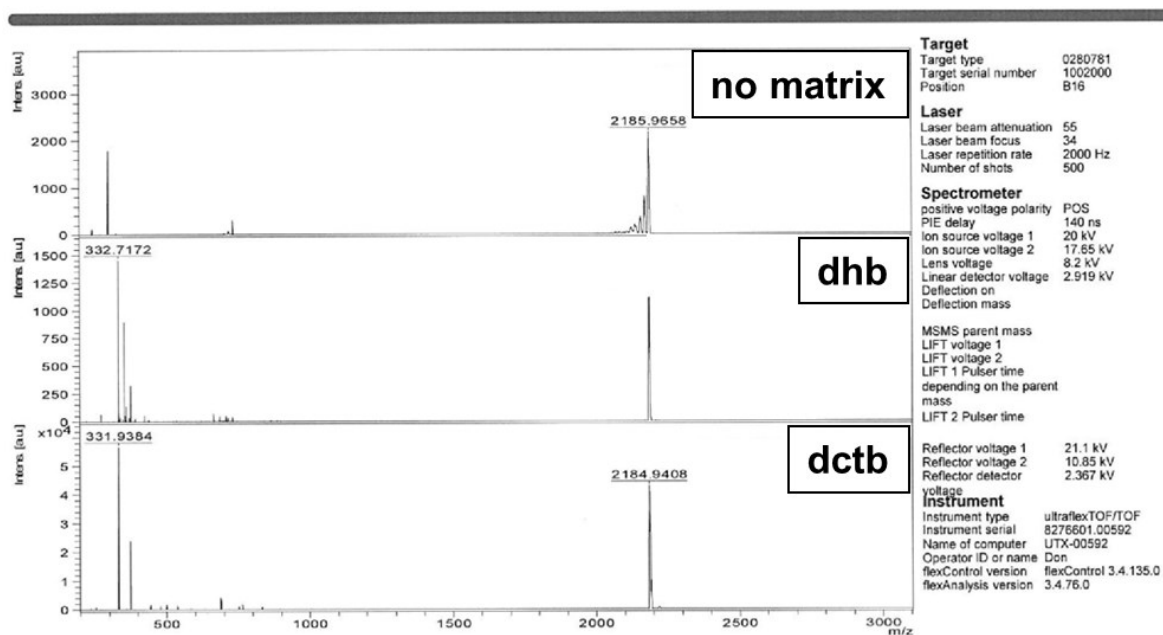

## HRMS (MALDI)

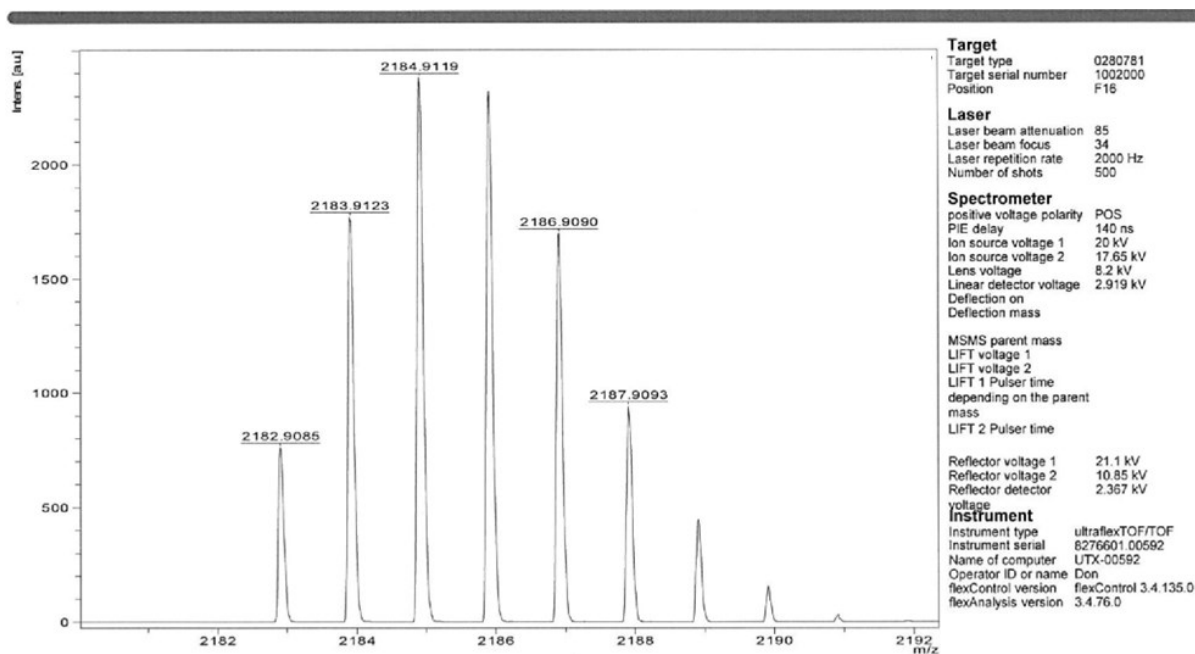

## SmartFormula

| Formula                    | Mass       | Error  | mSigma   | DblEq | N rule | Electron Configuration |
|----------------------------|------------|--------|----------|-------|--------|------------------------|
| C 152 H<br>130 N 8 Ni<br>2 | 2,182.9120 | 1.6062 | 131.5855 | 92.00 | ok     | odd                    |

Figure S46. MS/HRMS (MALDI) of 11.



$^1\text{H}$  NMR (400 MHz,  $\text{CDCl}_3$ , rt)

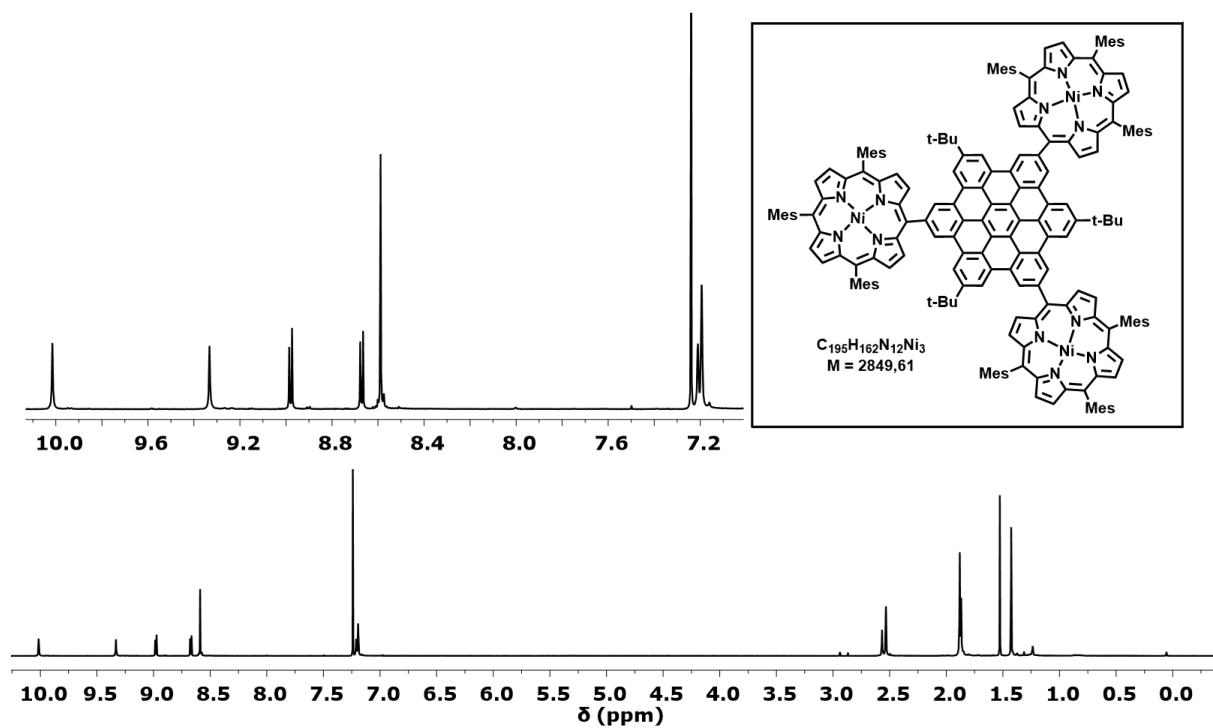

$^{13}\text{C}$  NMR (101 MHz,  $\text{CDCl}_3$ , rt)

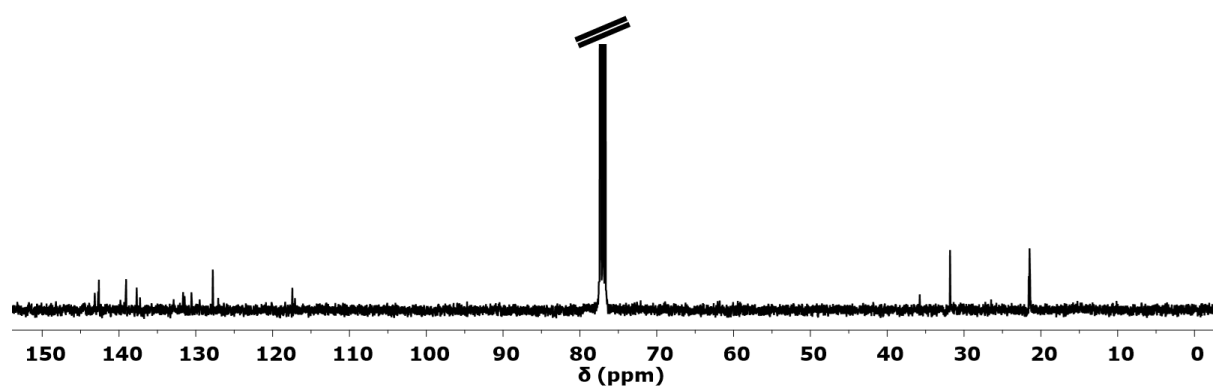

Figure S47.  $^1\text{H}$  and  $^{13}\text{C}$  NMR of 14.

# MS (MALDI)

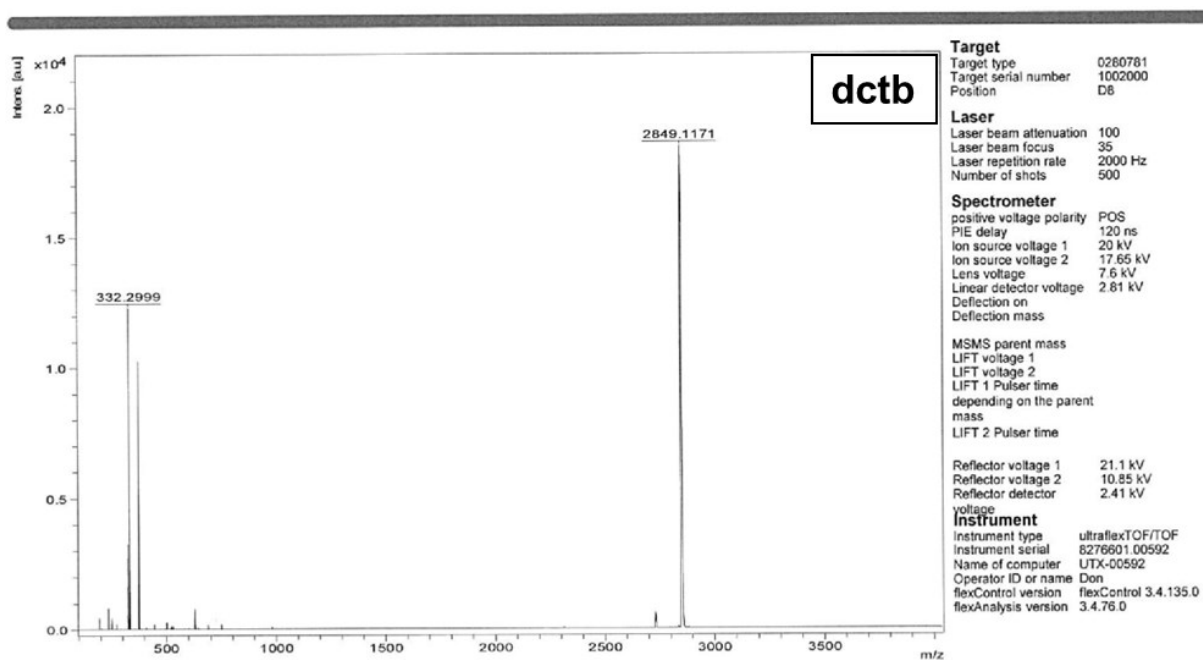

# HRMS (MALDI)

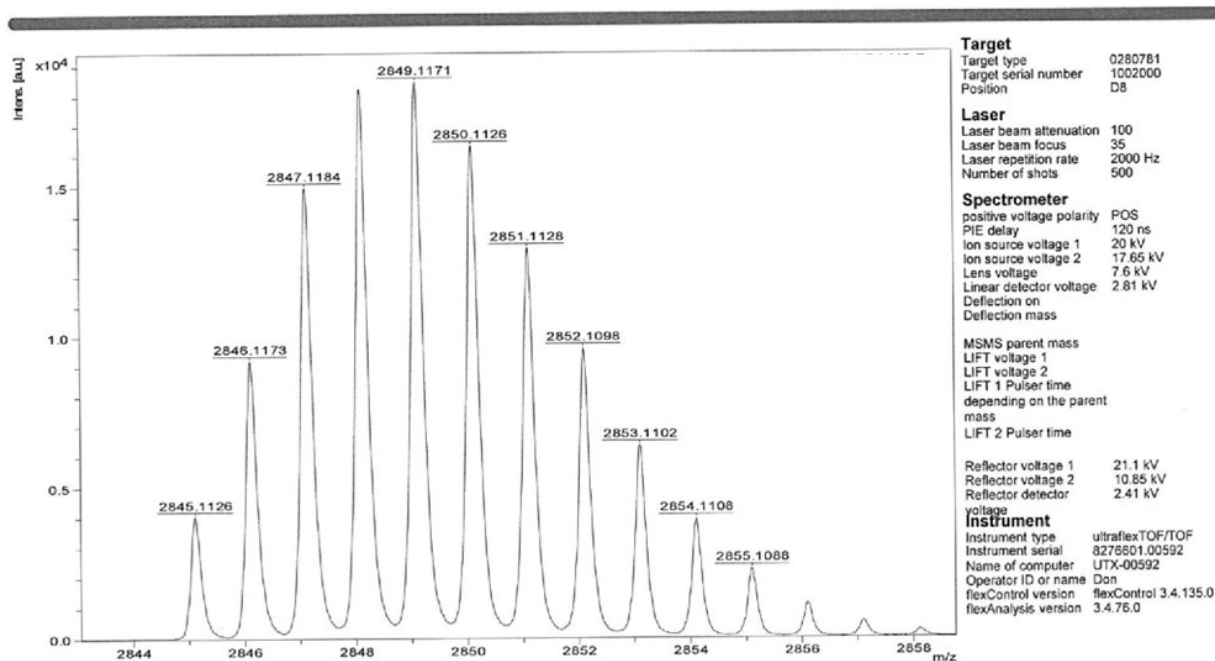

## SmartFormula

| Formula                     | Mass       | Error  | mSigma  | DblEq  | N rule | Electron Configuration |
|-----------------------------|------------|--------|---------|--------|--------|------------------------|
| C 195 H<br>162 N 12<br>Ni 3 | 2,845.1100 | 0.9056 | 21.7642 | 121.00 | ok     | odd                    |

Figure S48. MS/HRMS (MALDI) of 14.

$^1\text{H}$  NMR (601 MHz,  $\text{CD}_2\text{Cl}_2$ , rt)

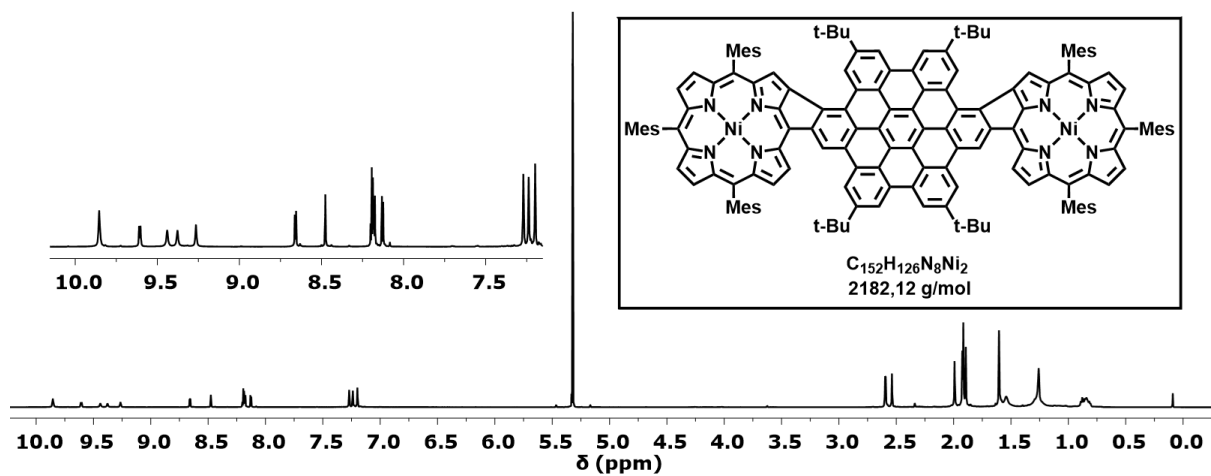

$^{13}\text{C}$  NMR - DEPTQ135 (151 MHz,  $\text{CD}_2\text{Cl}_2$ , rt)

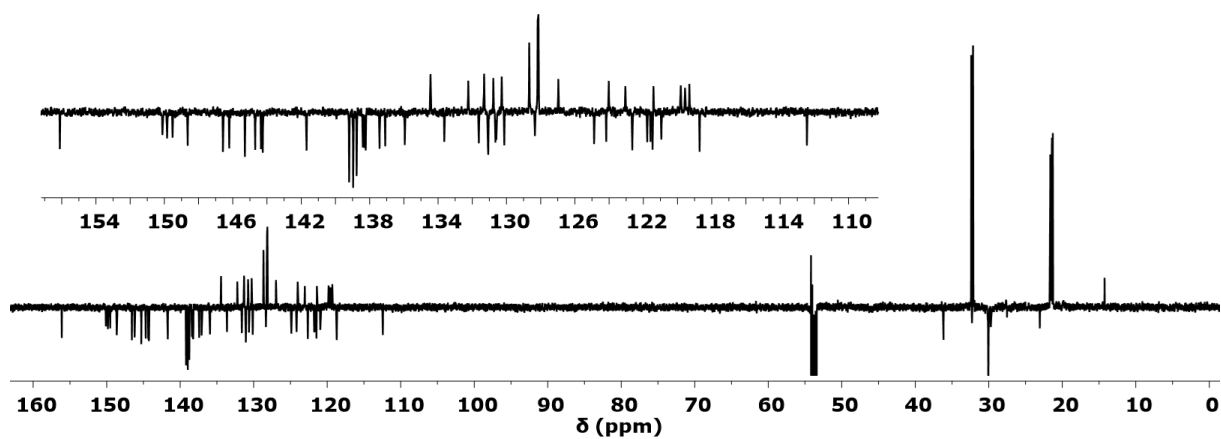

Figure S49.  $^1\text{H}$  and  $^{13}\text{C}$  NMR (DEPTQ135) of *p*-HBC.

$^1\text{H}$ - $^1\text{H}$  COSY (601 MHz,  $\text{CD}_2\text{Cl}_2$ , rt)

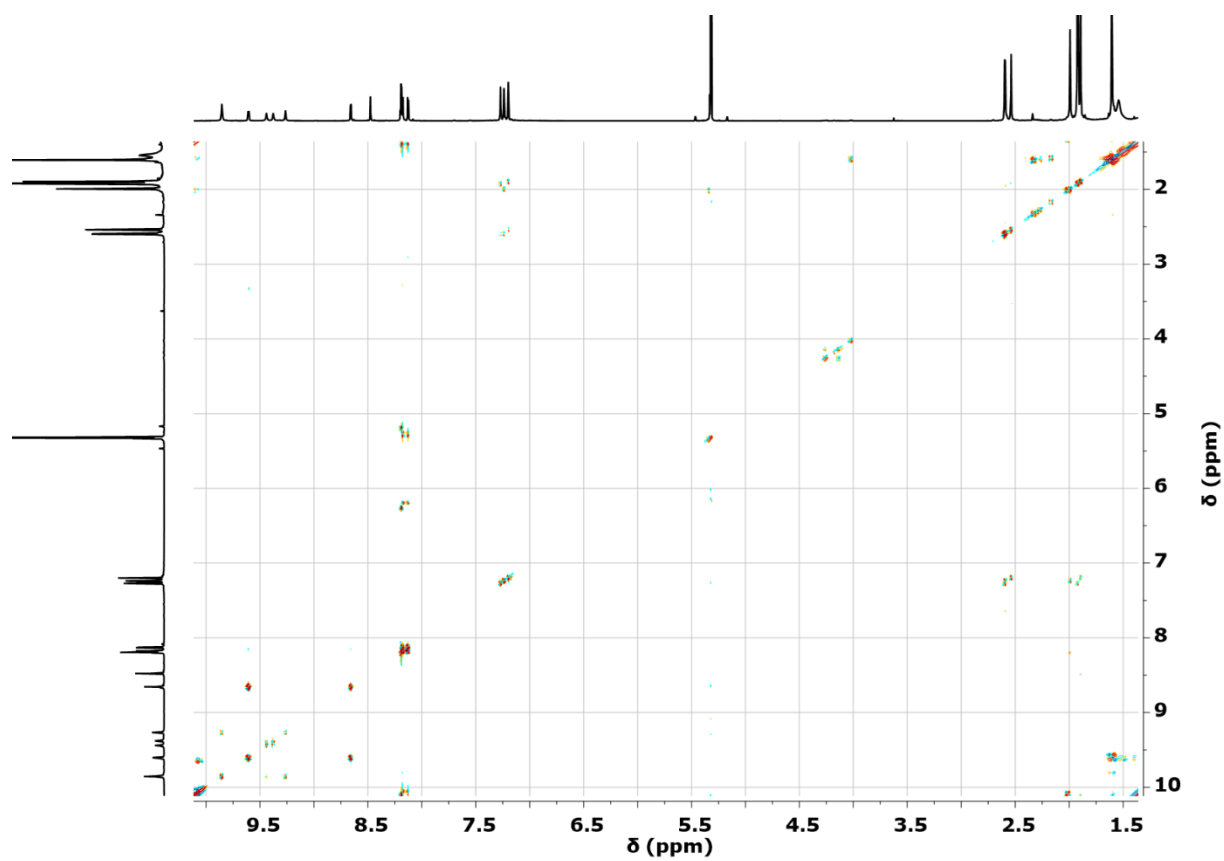

Figure S50.  $^1\text{H}$ - $^1\text{H}$  COSY of *p*-HBC.

$^1\text{H}$ - $^{13}\text{C}$  HSQC (601 MHz,  $\text{CD}_2\text{Cl}_2$ , rt)

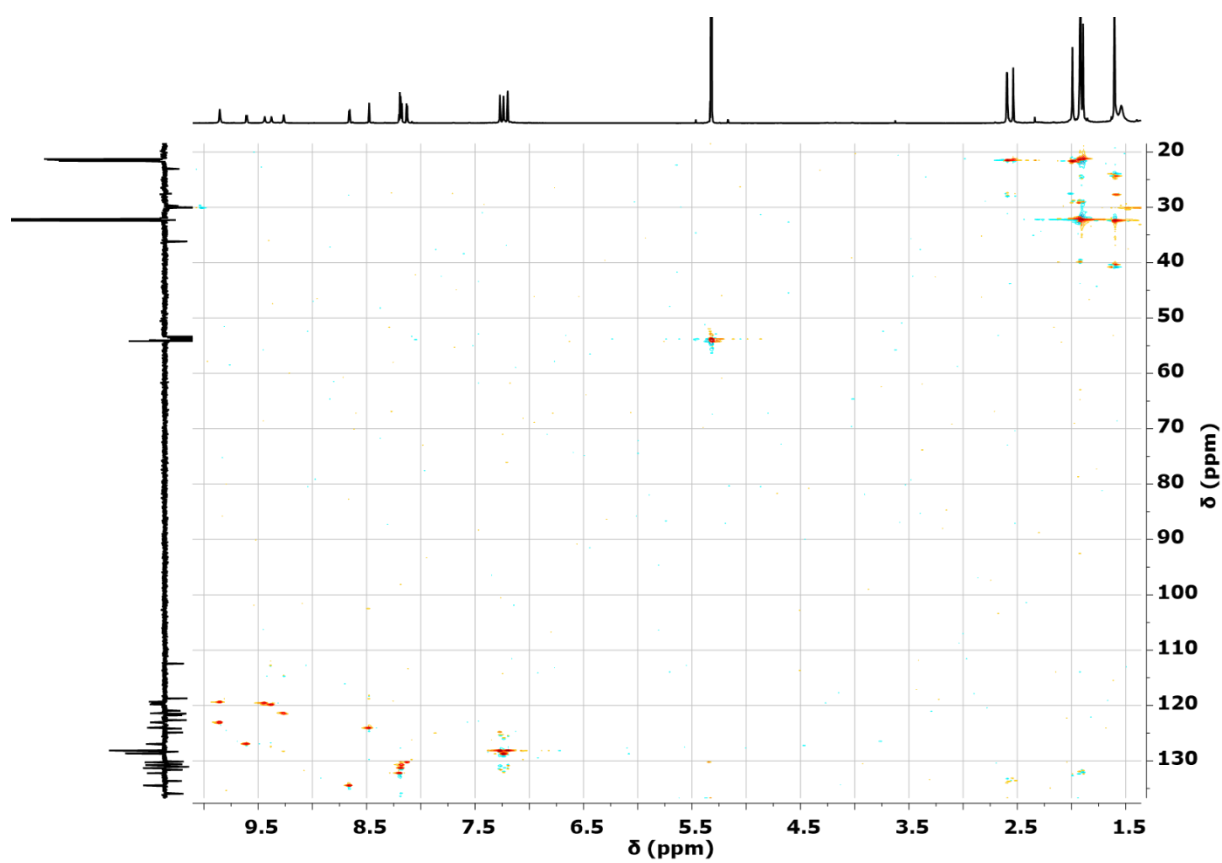

Figure S51.  $^1\text{H}$ - $^{13}\text{C}$  HSQC of *p*-HBC.

$^1\text{H}$ - $^{13}\text{C}$  HMBC (601 MHz,  $\text{CD}_2\text{Cl}_2$ , rt)

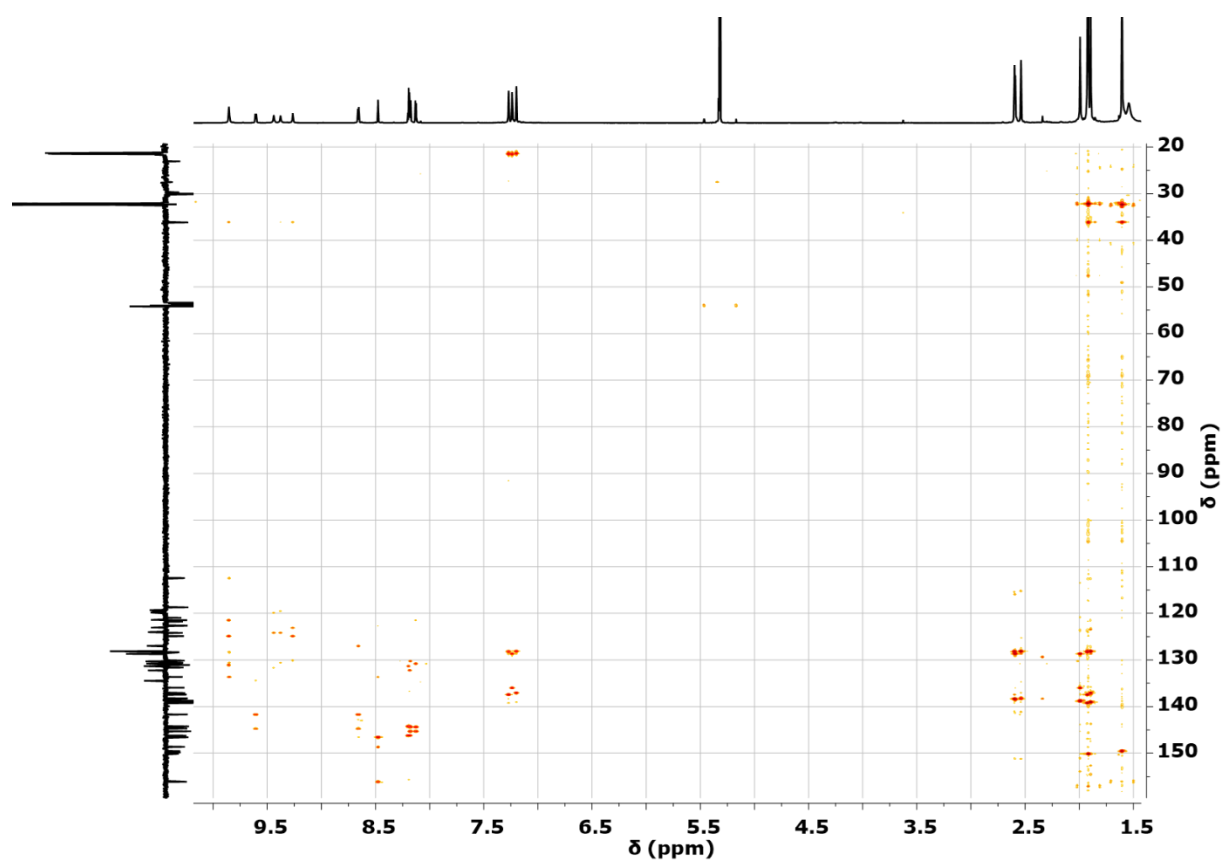

Figure S52.  $^1\text{H}$ - $^{13}\text{C}$  HMBC of *p*-HBC.

1,1 ADEQUATE (601 MHz, CD<sub>2</sub>Cl<sub>2</sub>, rt)

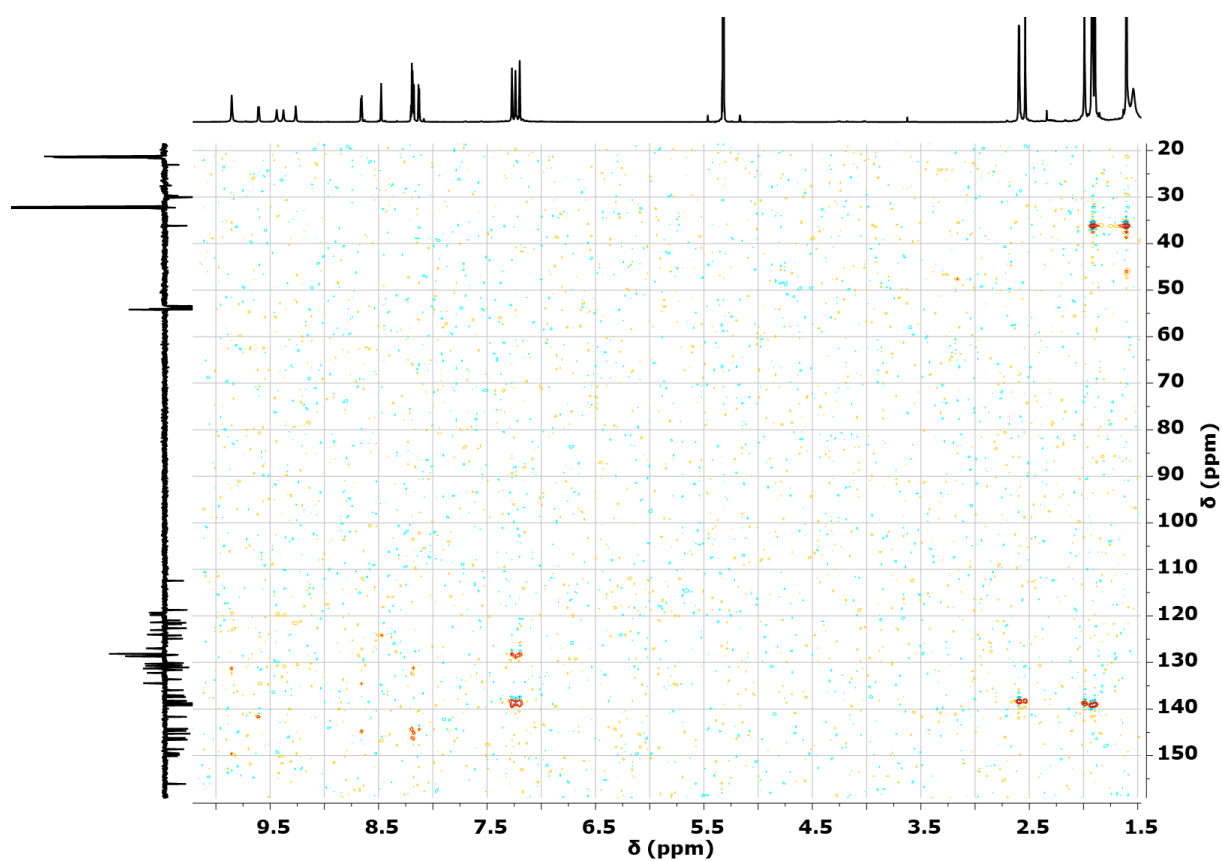

Figure S53. 1,1 ADEQUATE of *p*-HBC.

## MS (MALDI)

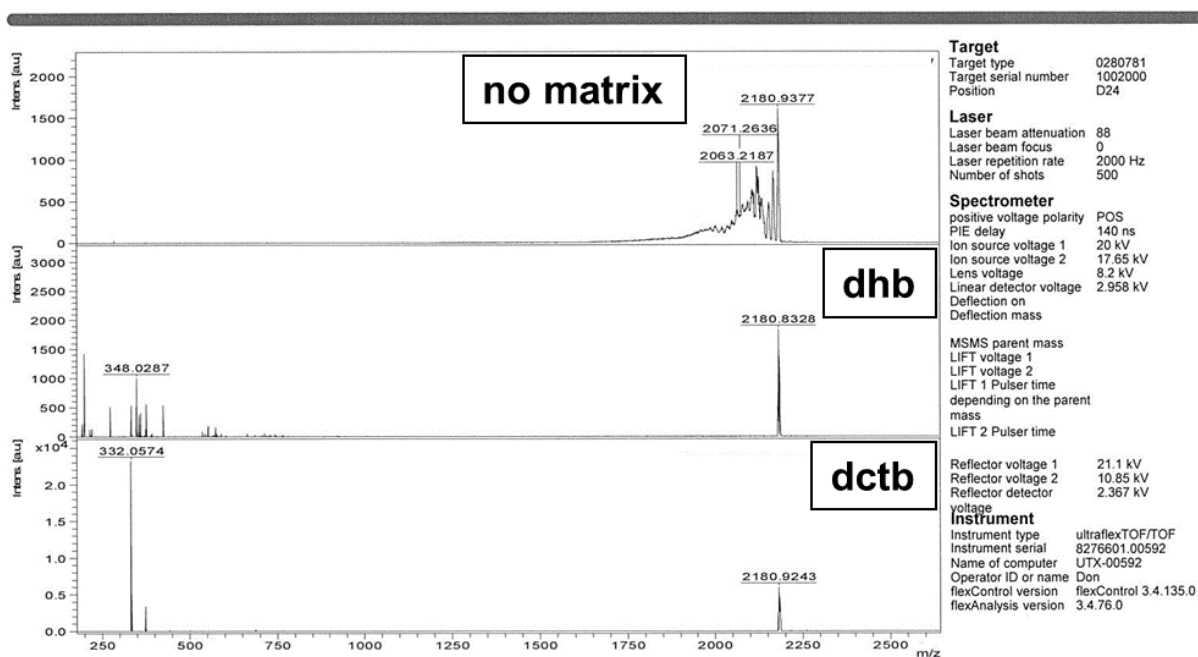

## HRMS (MALDI)

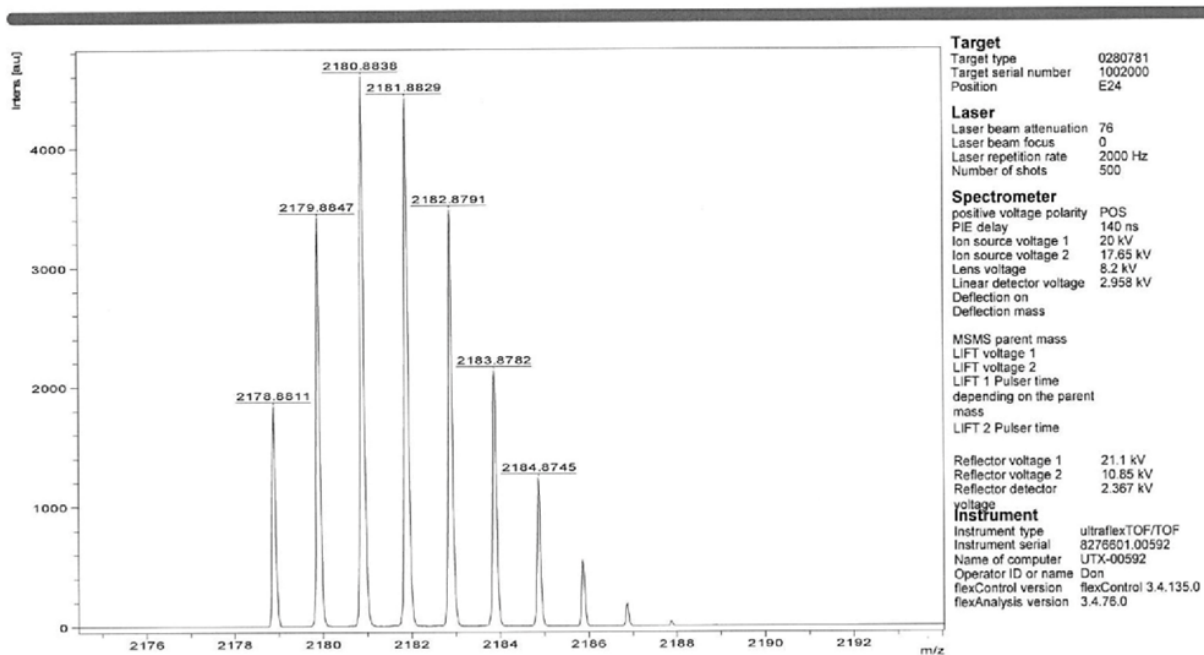

## SmartFormula

| Formula                    | Mass       | Error  | mSigma  | DbIEq | N rule | Electron Configuration |
|----------------------------|------------|--------|---------|-------|--------|------------------------|
| C 152 H<br>126 N 8 Ni<br>2 | 2,178.8807 | 0.1761 | 75.5489 | 94.00 | ok     | odd                    |

Figure S54. MS/HRMS (MALDI) of *p*-HBC.



$^1\text{H}$  NMR (601 MHz,  $\text{CD}_2\text{Cl}_2$ , rt)

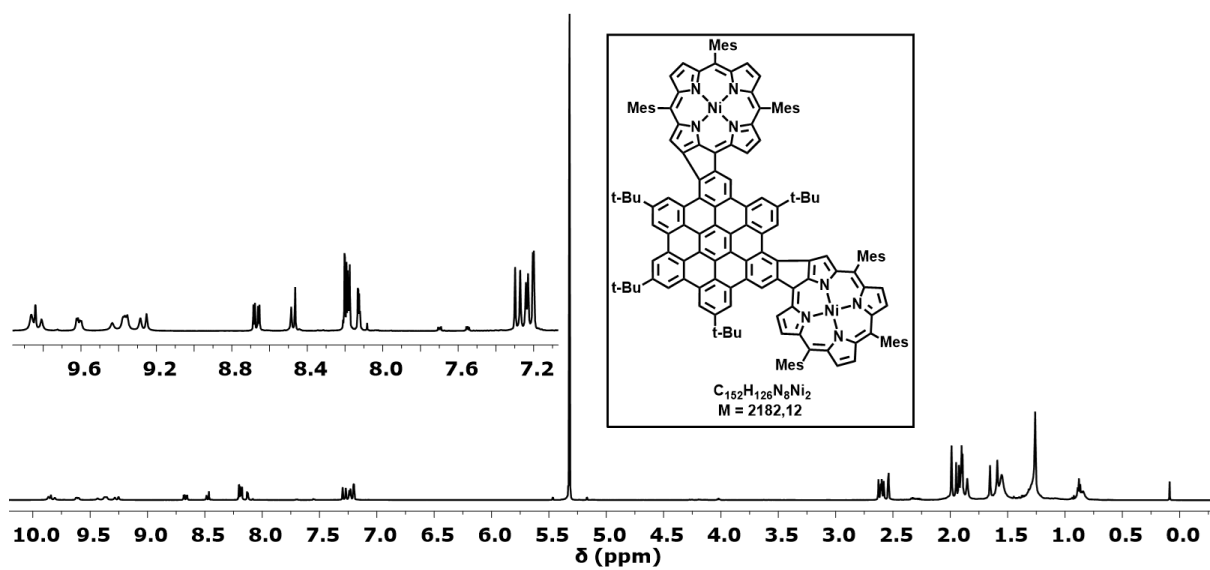

$^{13}\text{C}$  NMR - DEPTQ135 (151 MHz,  $\text{CD}_2\text{Cl}_2$ , rt)

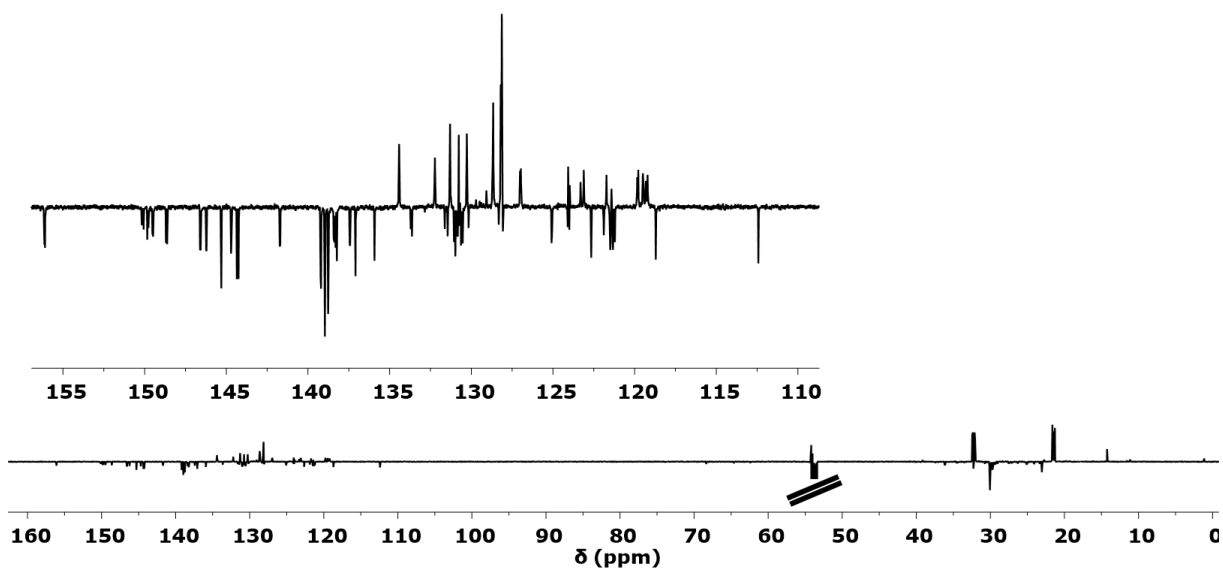

Figure S55.  $^1\text{H}$  and  $^{13}\text{C}$  NMR (DEPTQ135) of *m*-HBC.

$^1\text{H}$ - $^1\text{H}$  COSY (601 MHz,  $\text{CD}_2\text{Cl}_2$ , rt)

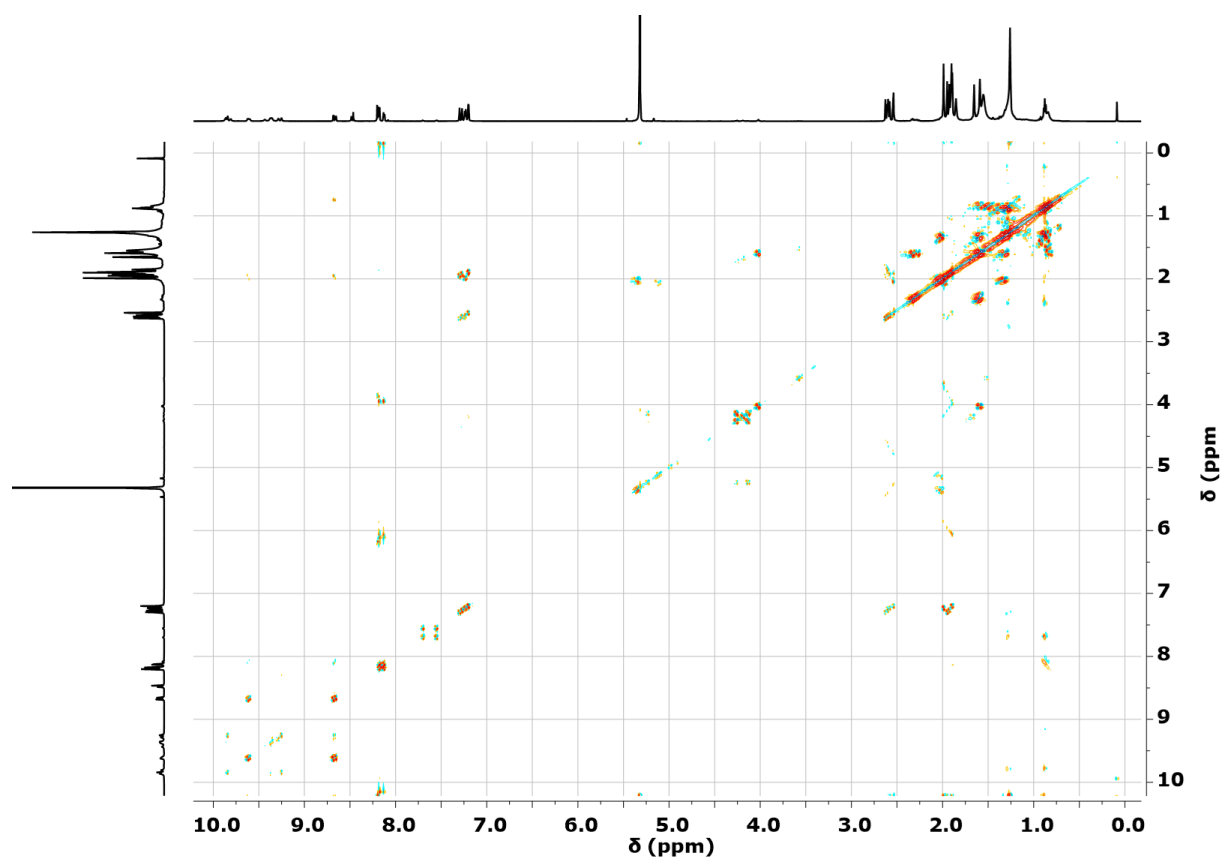

Figure S56.  $^1\text{H}$ - $^1\text{H}$  COSY of *m*-HBC.

$^1\text{H}$ - $^{13}\text{C}$  HSQC (601 MHz,  $\text{CD}_2\text{Cl}_2$ , rt)

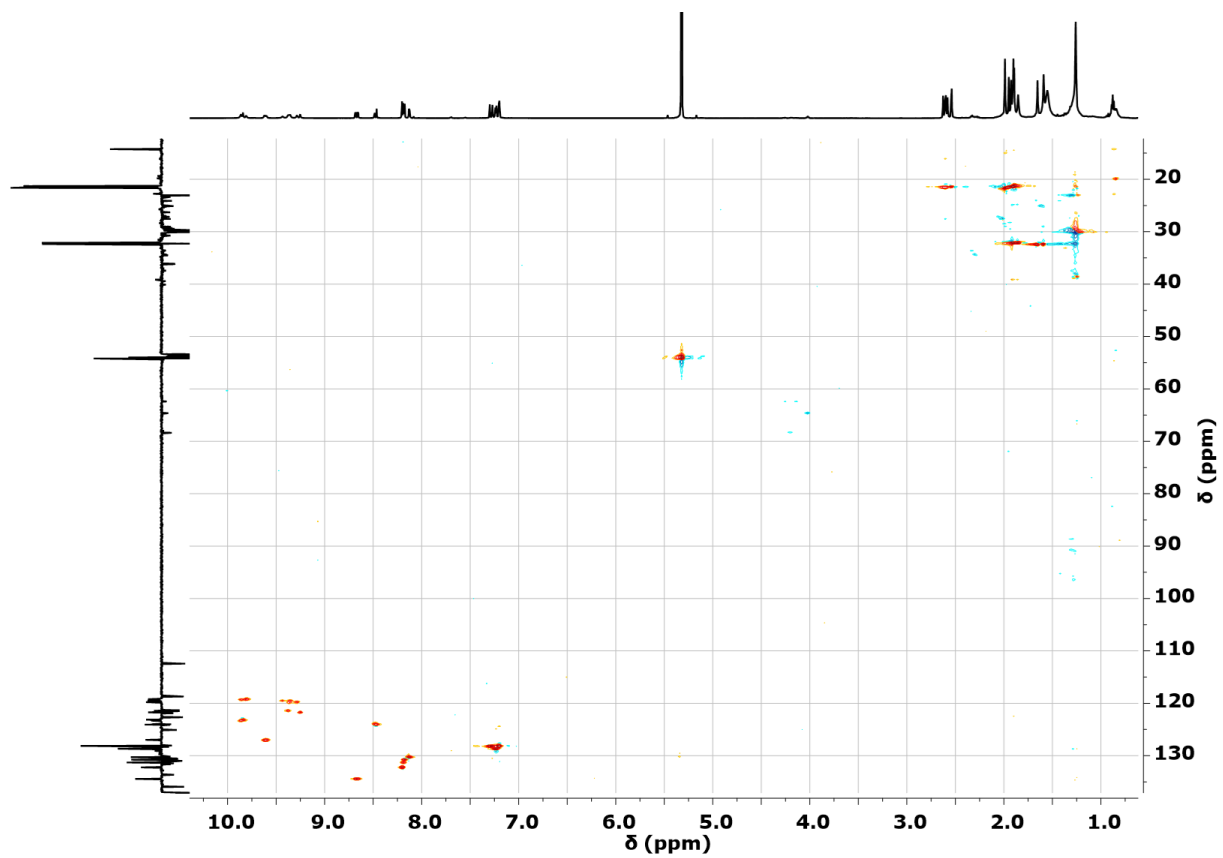

Figure S57.  $^1\text{H}$ - $^{13}\text{C}$  HSQC of *m*-HBC.

$^1\text{H}$ - $^{13}\text{C}$  HMBC (601 MHz,  $\text{CD}_2\text{Cl}_2$ , rt)

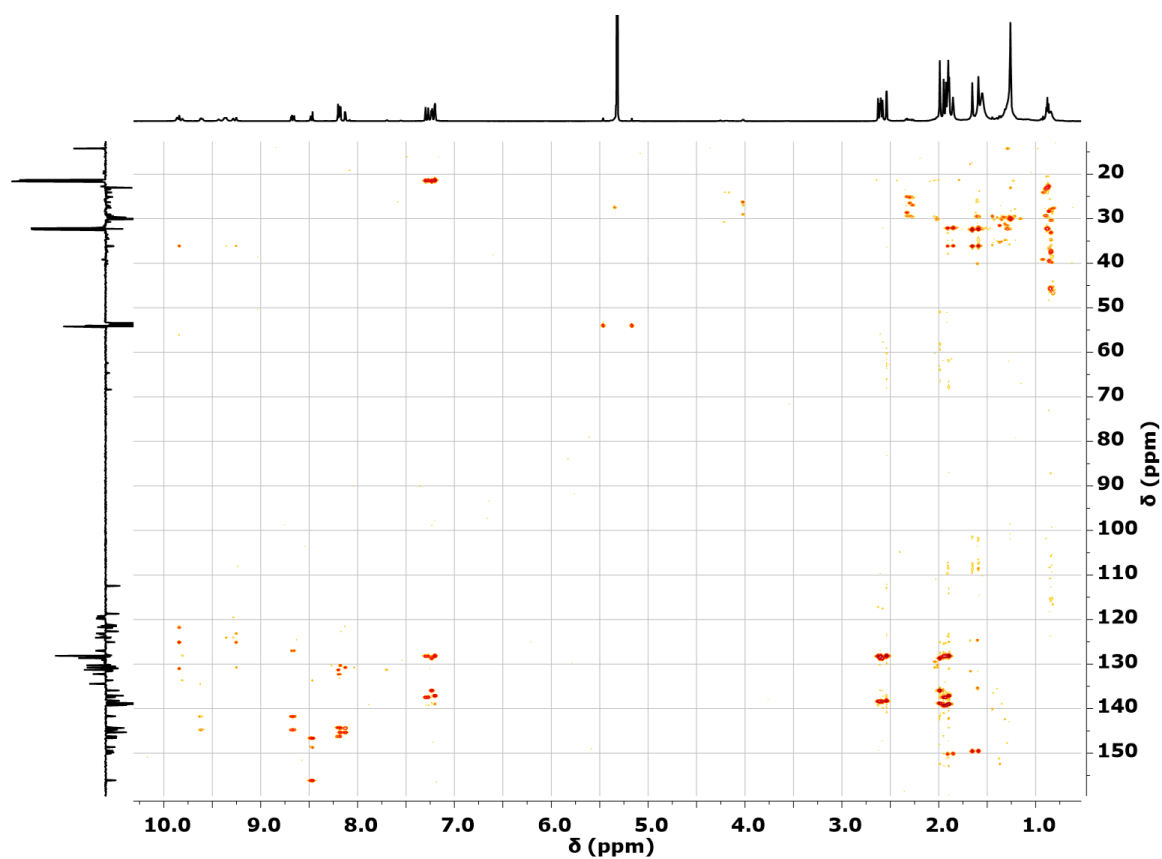

Figure S58.  $^1\text{H}$ - $^{13}\text{C}$  HMBC of *m*-HBC.

$^1\text{H}$ - $^1\text{H}$  ROESY (601 MHz,  $\text{CD}_2\text{Cl}_2$ , rt)

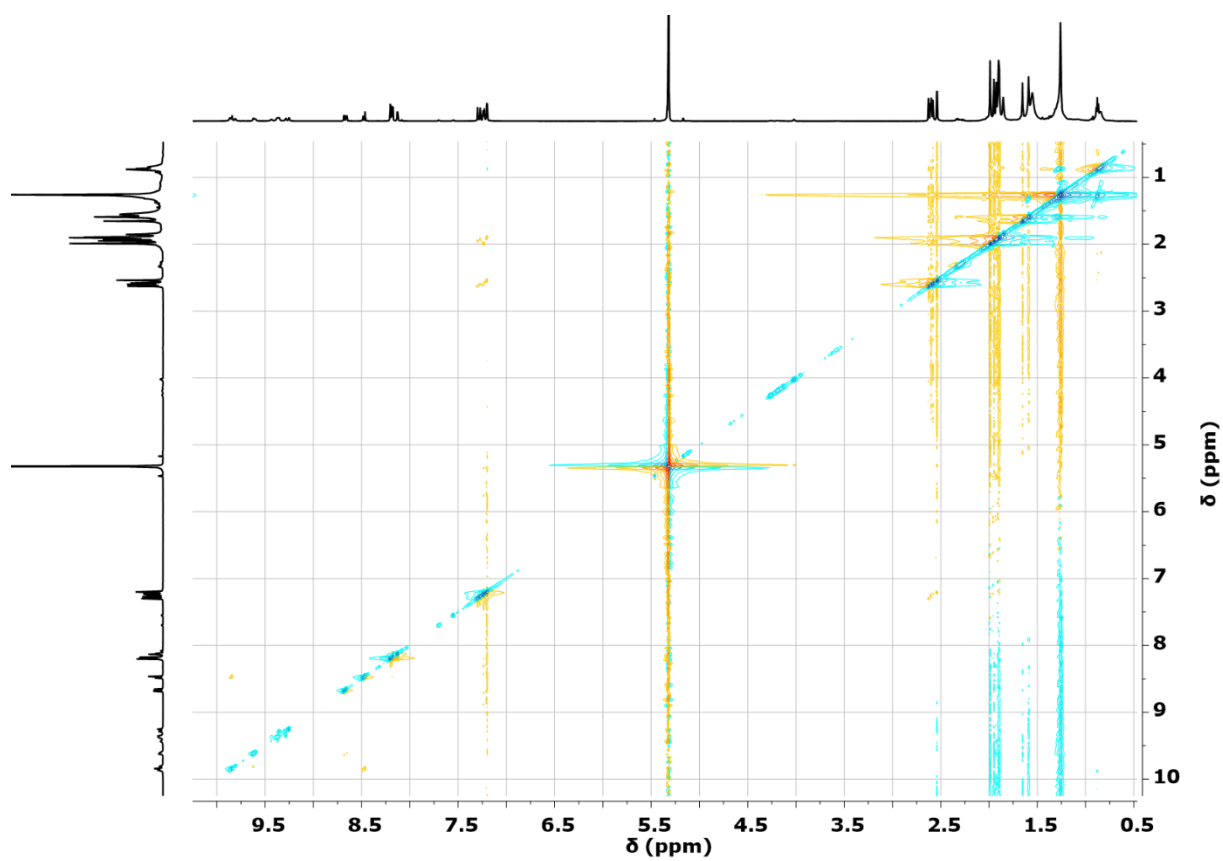

Figure S59.  $^1\text{H}$ - $^1\text{H}$  ROESY of *m*-HBC.

## MS (MALDI)

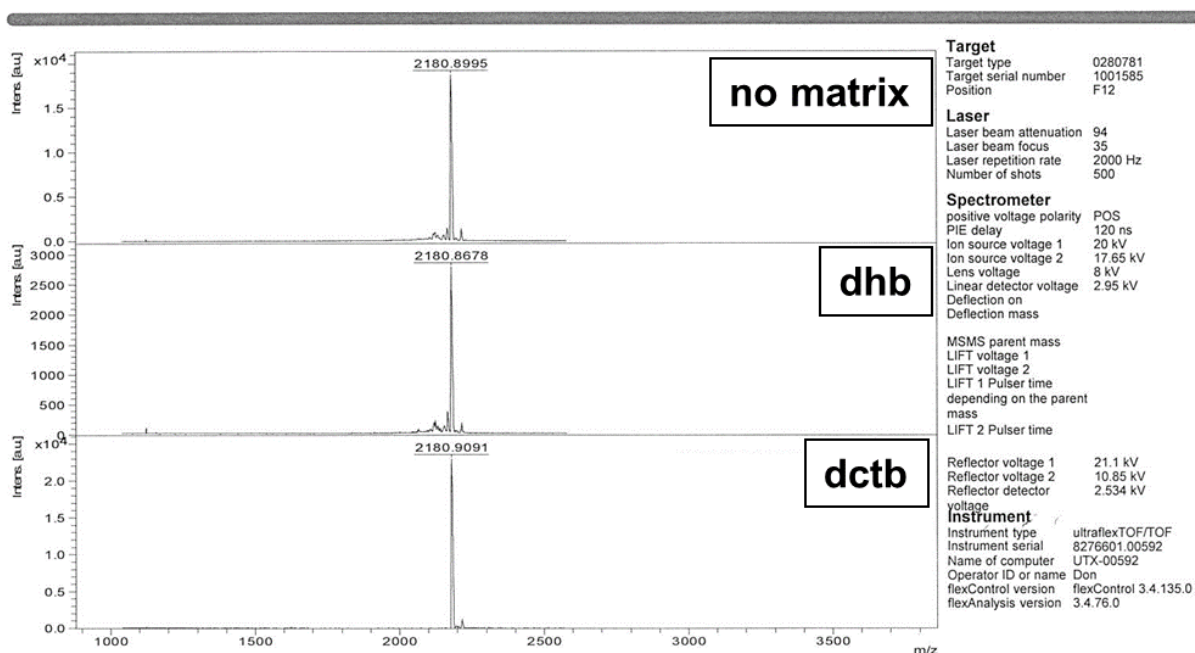

## HRMS (MALDI)

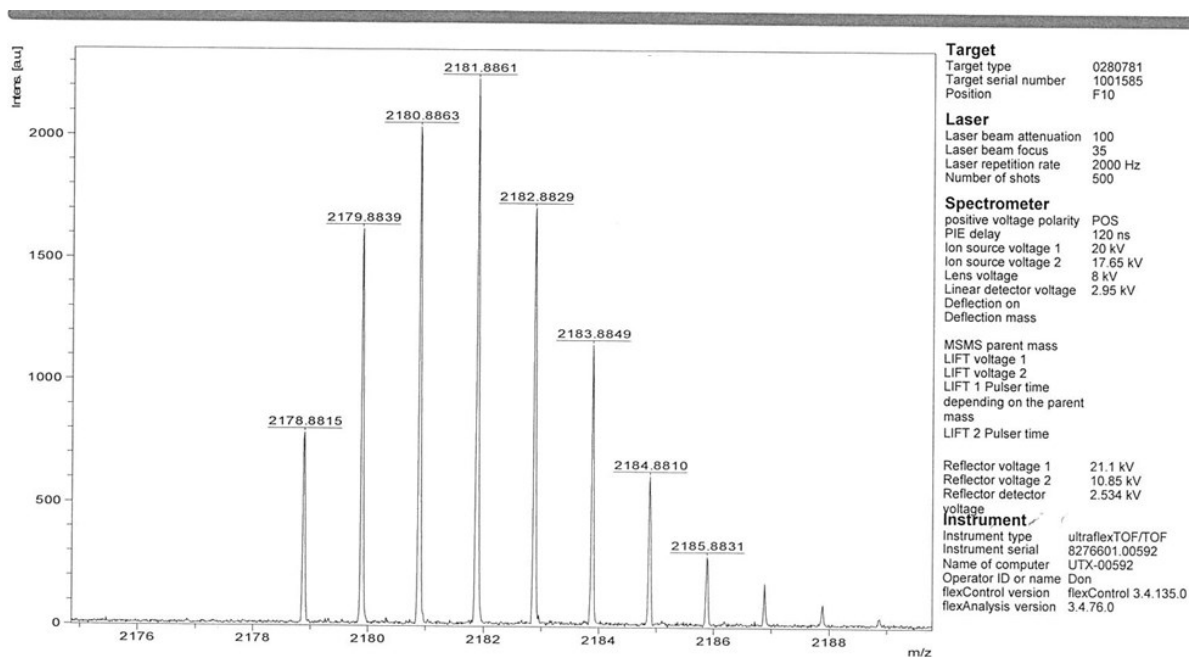

## SmartFormula

| Formula                               | Mass       | Error  | mSigma  | DbLEq | N rule | Electron Configuration |
|---------------------------------------|------------|--------|---------|-------|--------|------------------------|
| C <sub>152</sub> H<br>126 N 8 Ni<br>2 | 2,178.8807 | 0.3665 | 61.5236 | 94.00 | ok     | odd                    |

Figure S60. MS/HRMS (MALDI) of *m*-HBC.

$^1\text{H}$  NMR (601 MHz,  $\text{CD}_2\text{Cl}_2/\text{CS}_2$ , rt)

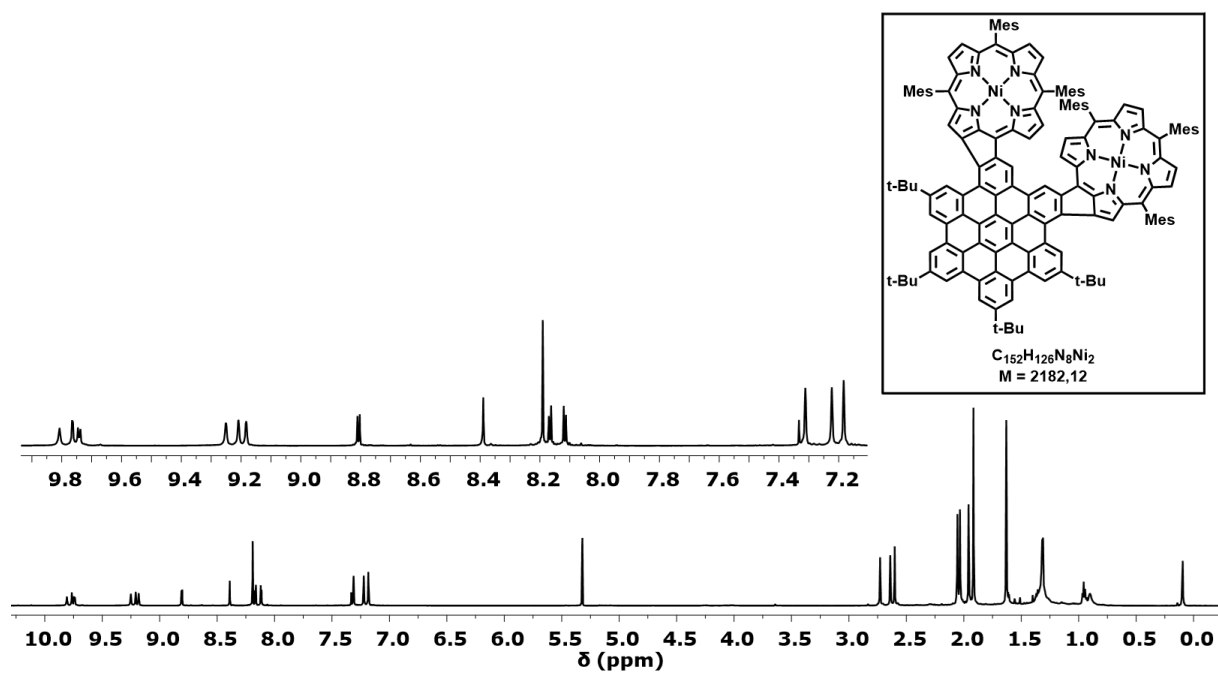

$^{13}\text{C}$  NMR - DEPTQ135 (151 MHz,  $\text{CD}_2\text{Cl}_2/\text{CS}_2$ , rt)

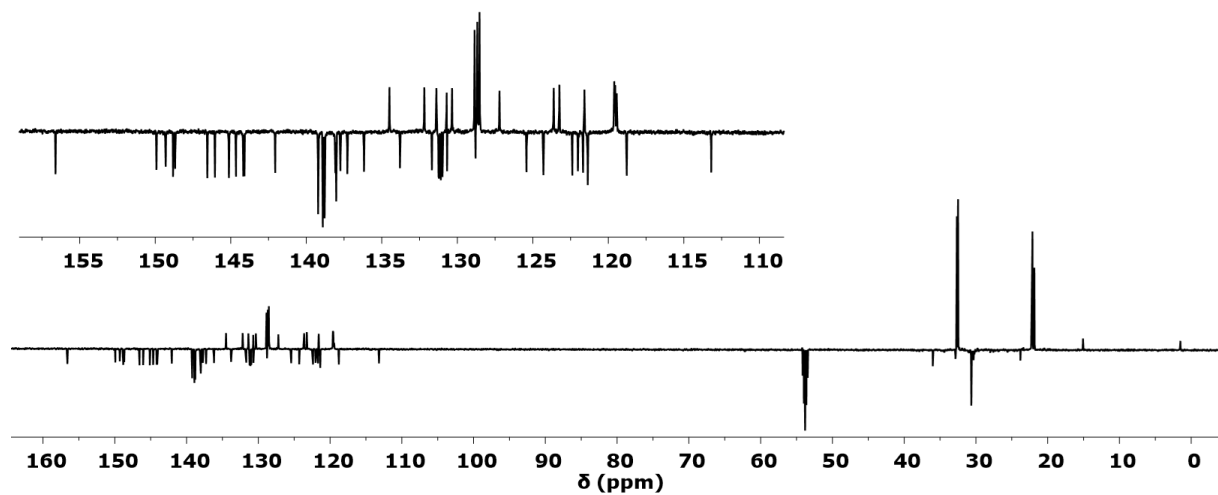

Figure S61.  $^1\text{H}$  and  $^{13}\text{C}$  NMR (DEPTQ135) of *o*-HBC.





$^1\text{H}$ - $^{13}\text{C}$  HSQC (601 MHz,  $\text{CD}_2\text{Cl}_2/\text{CS}_2$ , rt)

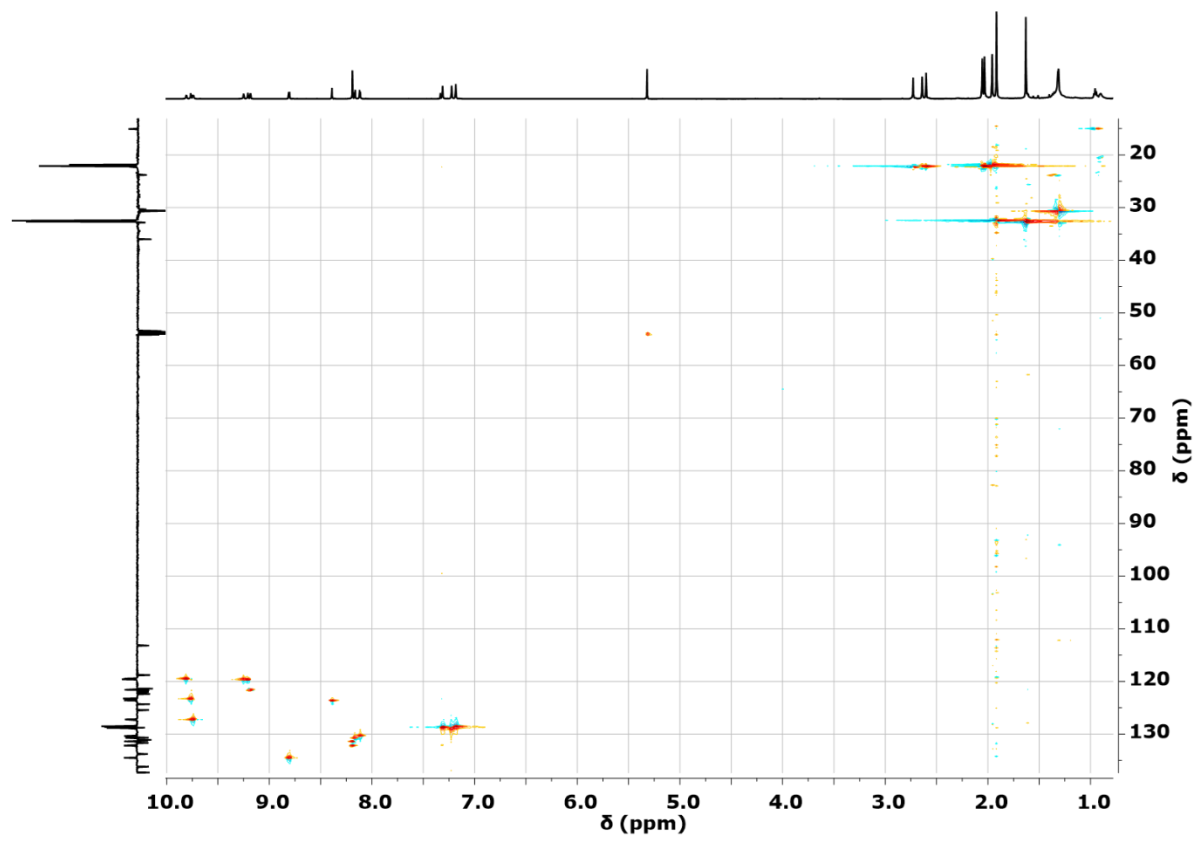

Figure S63.  $^1\text{H}$ - $^{13}\text{C}$  HSQC of **o**-HBC.

$^1\text{H}$ - $^{13}\text{C}$  HMBC (601 MHz,  $\text{CD}_2\text{Cl}_2/\text{CS}_2$ , rt)

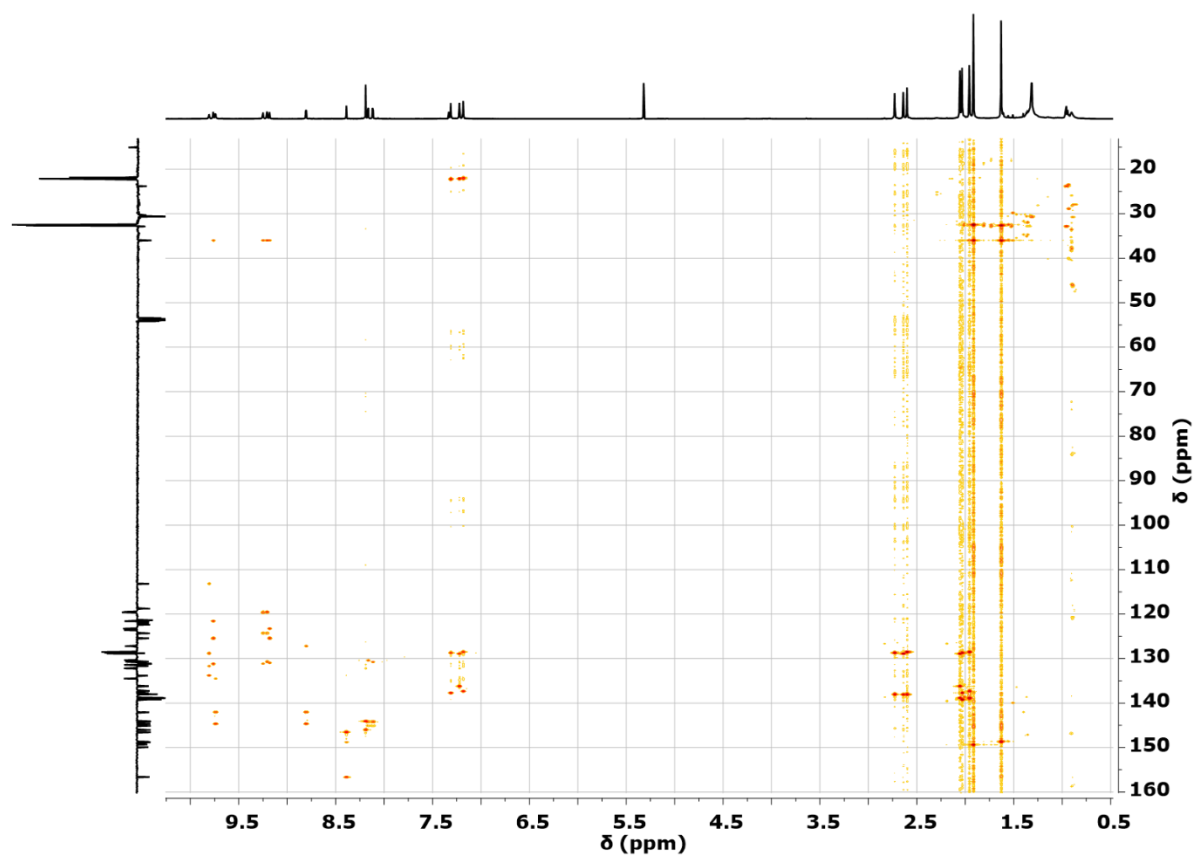

Figure S64.  $^1\text{H}$ - $^{13}\text{C}$  HMBC of *o*-HBC.

## MS (MALDI)

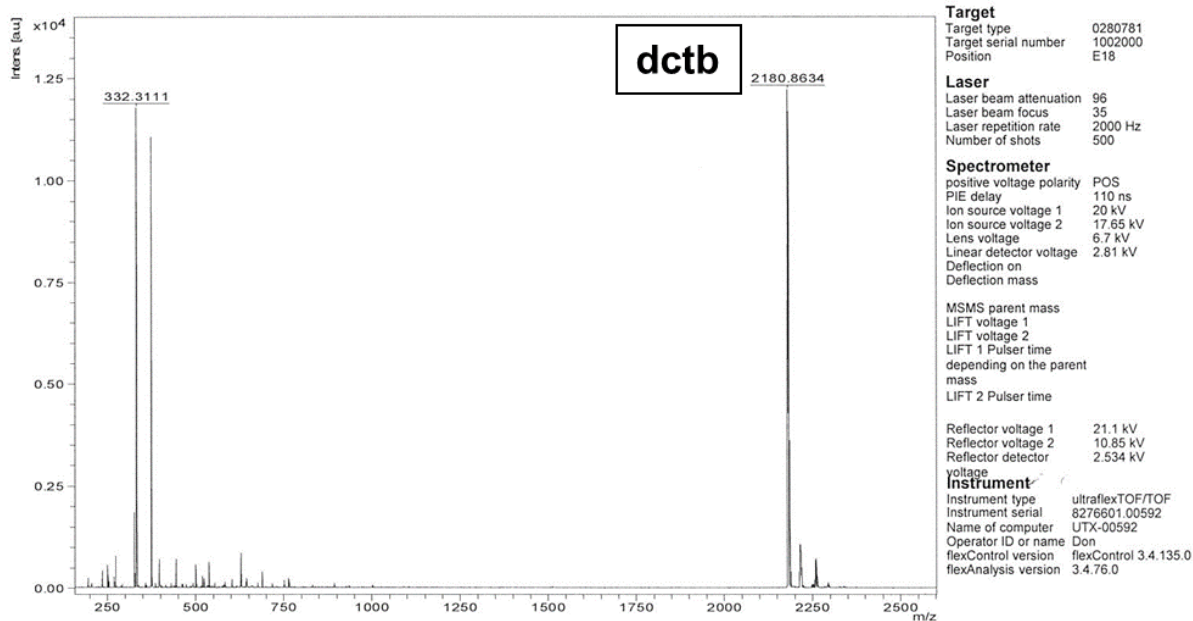

## HRMS (MALDI)

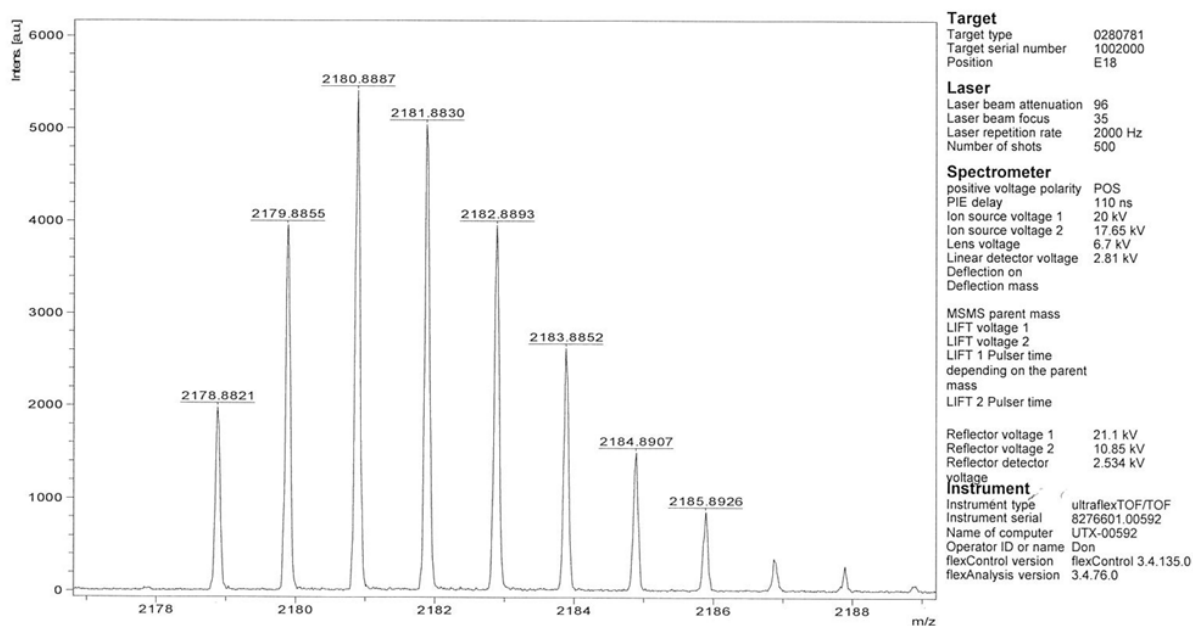

### SmartFormula

| Formula                    | Mass       | Error  | mSigma  | DblEq | N rule | Electron Configuration |
|----------------------------|------------|--------|---------|-------|--------|------------------------|
| C 152 H<br>126 N 8 Ni<br>2 | 2,178.8807 | 0.6712 | 55.8878 | 94.00 | ok     | odd                    |

Figure S65. MS/HRMS (MALDI) of *o*-HBC.

$^1\text{H}$  NMR (601 MHz,  $\text{CD}_2\text{Cl}_2$ , rt)

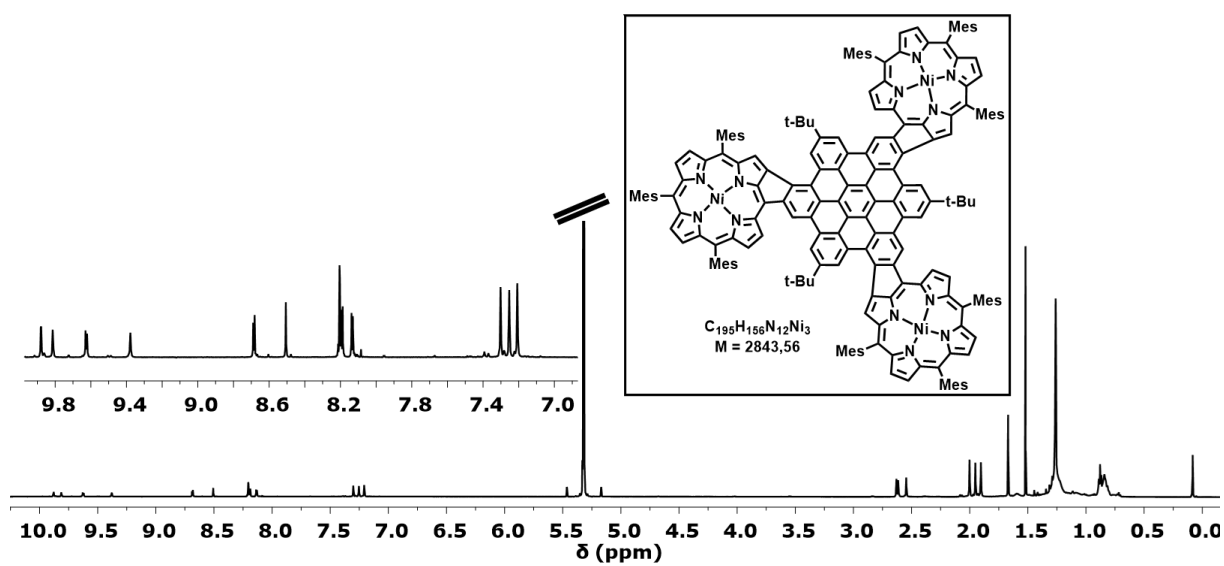

$^{13}\text{C}$  NMR - DEPTQ135 (151 MHz,  $\text{CD}_2\text{Cl}_2$ , rt)

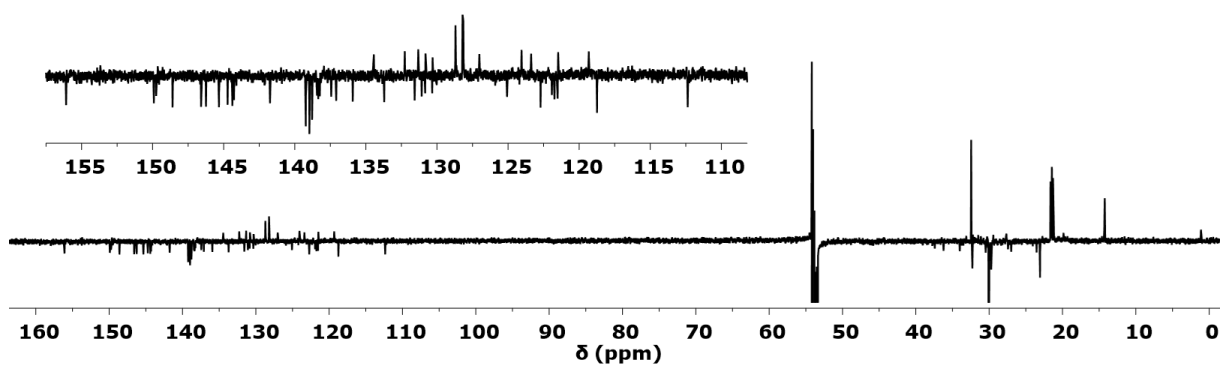

Figure S66.  $^1\text{H}$  and  $^{13}\text{C}$  NMR (DEPTQ135) of *tri*-HBC.

$^1\text{H}$ - $^1\text{H}$  COSY (601 MHz,  $\text{CD}_2\text{Cl}_2$ , rt)

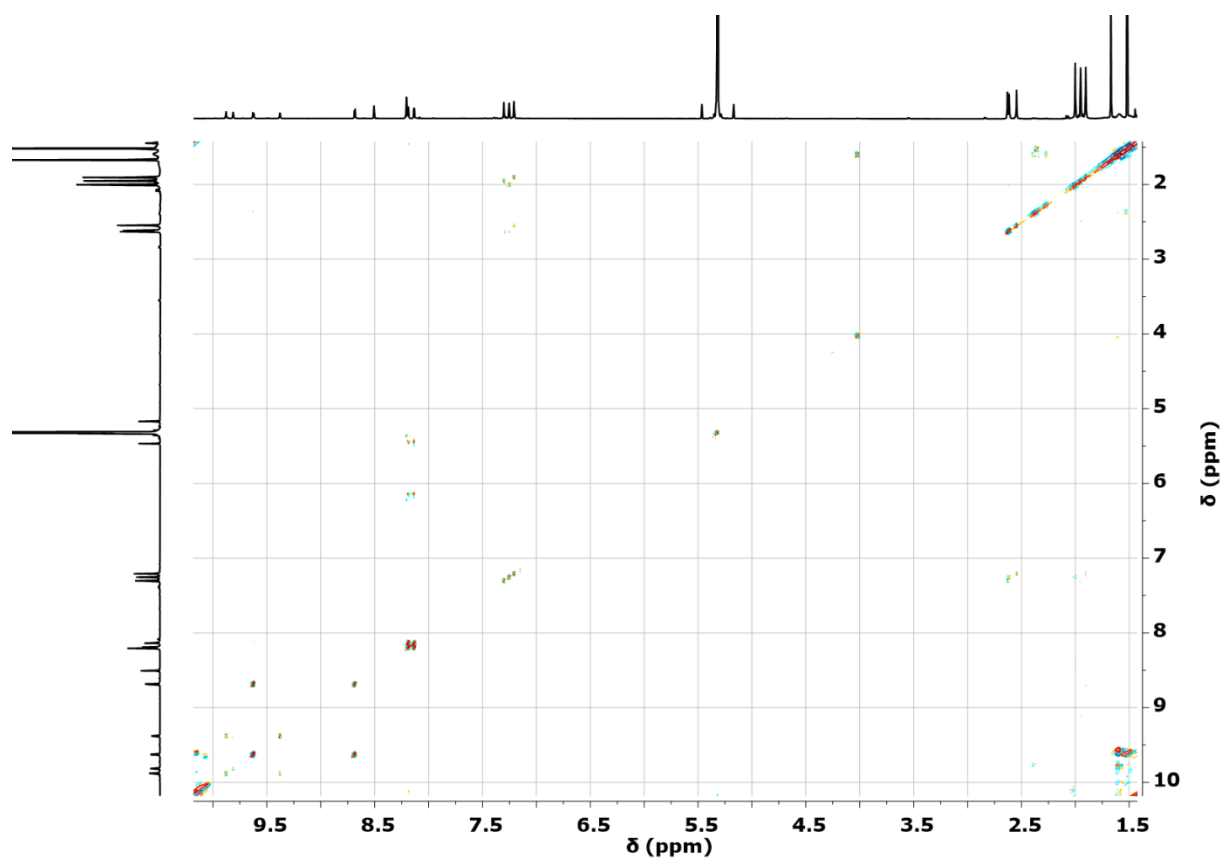

Figure S67.  $^1\text{H}$ - $^1\text{H}$  COSY of *tri*-HBC.

$^1\text{H}$ - $^{13}\text{C}$  HSQC (601 MHz,  $\text{CD}_2\text{Cl}_2$ , rt)

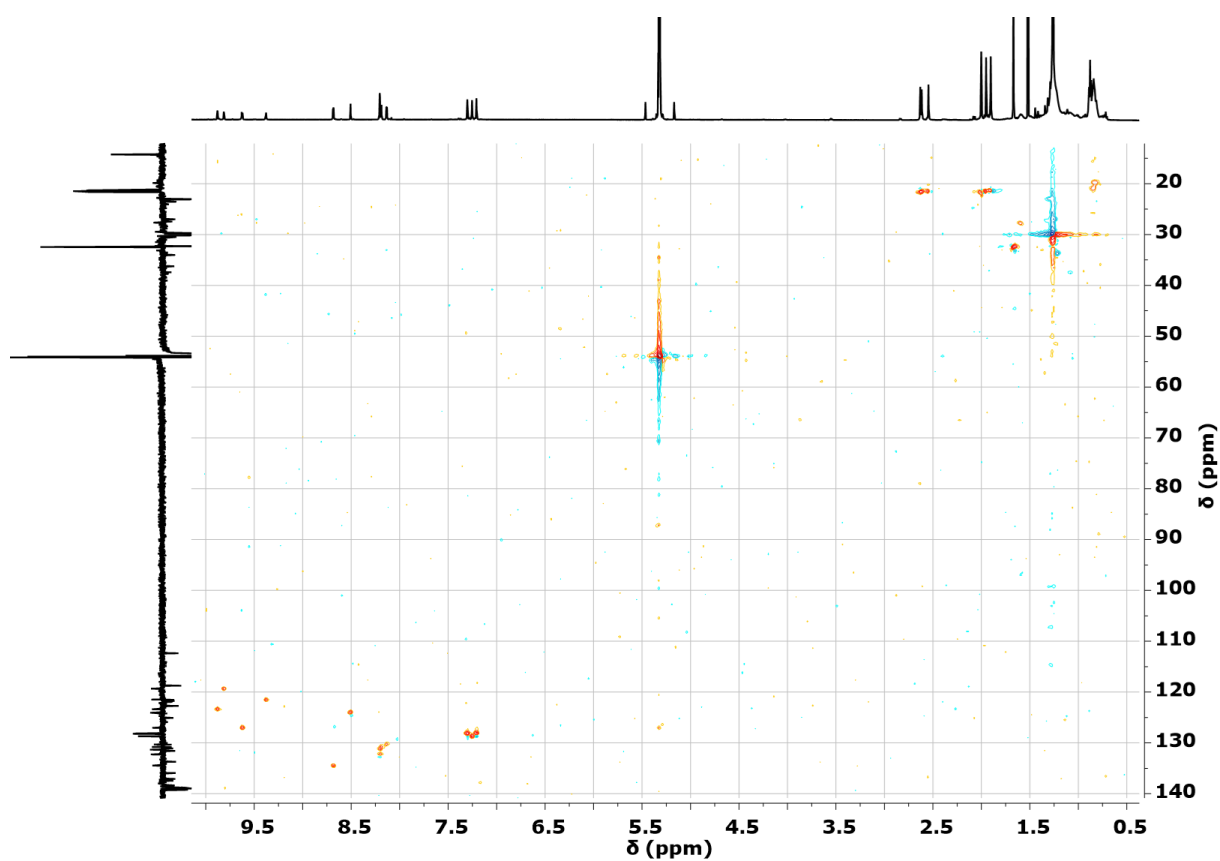

Figure S68.  $^1\text{H}$ - $^{13}\text{C}$  HSQC of *tri*-HBC.

$^1\text{H}$ - $^{13}\text{C}$  HMBC (601 MHz,  $\text{CD}_2\text{Cl}_2$ , rt)

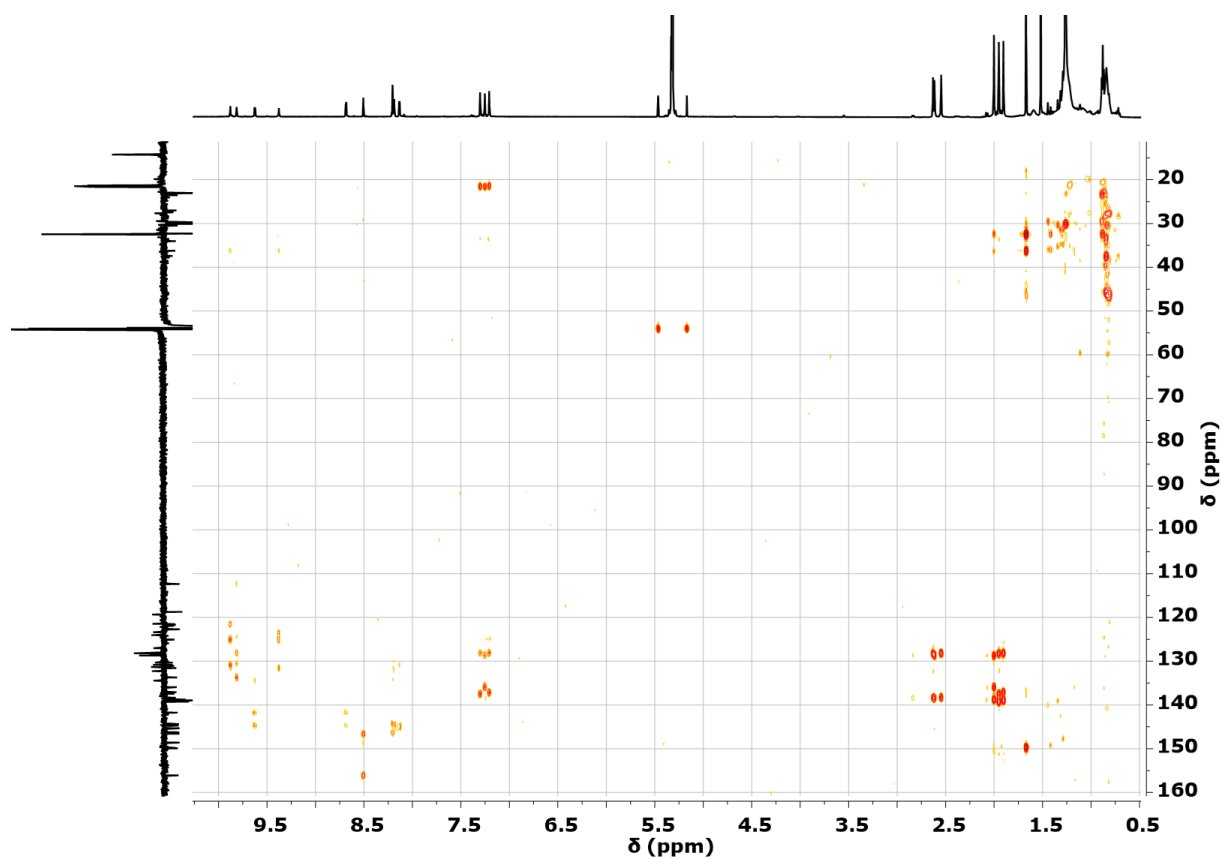

Figure S69.  $^1\text{H}$ - $^{13}\text{C}$  HMBC of *tri*-HBC.

## MS (MALDI)

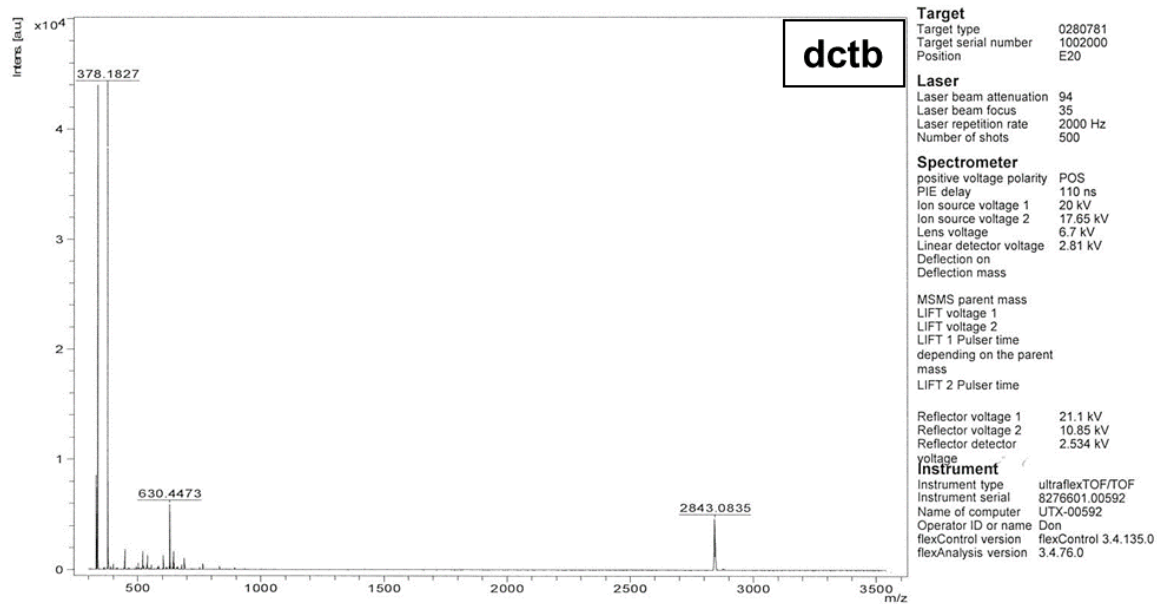

## HRMS (MALDI)

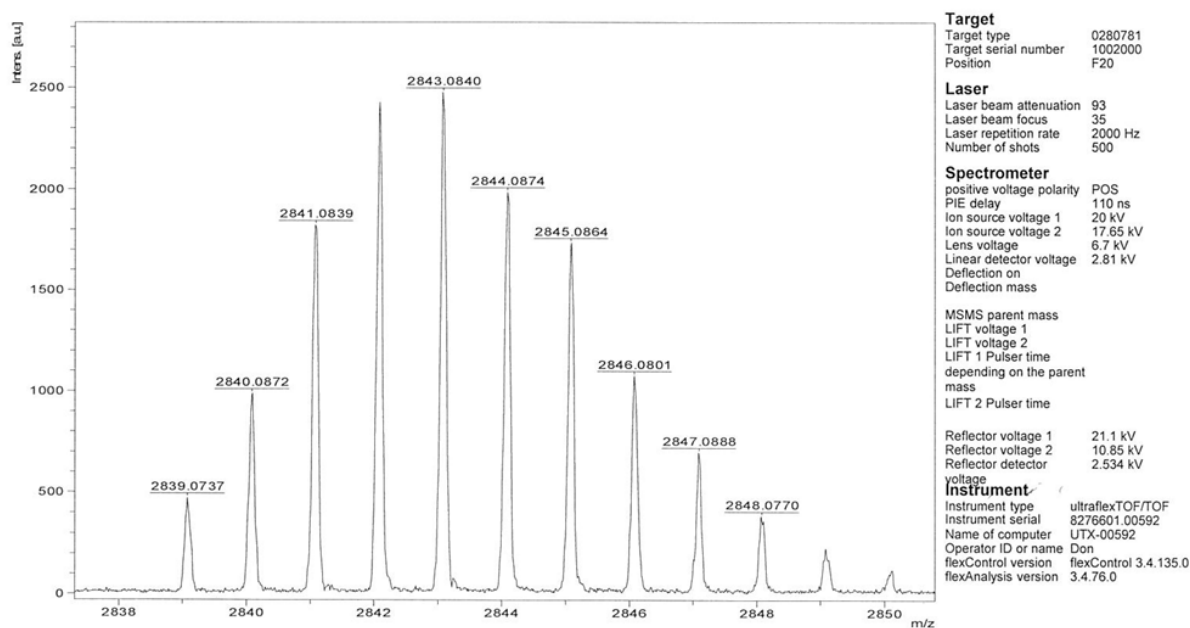

## SmartFormula

| Formula                     | Mass       | Error  | mSigma  | DbEq   | N rule | Electron Configuration |
|-----------------------------|------------|--------|---------|--------|--------|------------------------|
| C 195 H<br>156 N 12<br>Ni 3 | 2,839.0631 | 3.7514 | 57.9244 | 124.00 | ok     | odd                    |

Figure S70. MS/HRMS (MALDI) of *tri*-HBC.



## 4 DFT Calculations

Geometries were relaxed using density-functional theory (DFT). The calculations were carried out with the plane-wave code PWScf of the Quantum Espresso software package,<sup>[5]</sup> utilizing the gradient-corrected Perdew-Burke-Ernzerhof (PBE) exchange-correlation functional,<sup>[6]</sup> Grimme D3 dispersion correction with Becke-Johnson damping,<sup>[7,8]</sup> Vanderbilt ultrasoft pseudopotentials,<sup>[9]</sup> and a plane-wave basis set with a kinetic energy cutoff of 30 Ry. Structures were assumed to be relaxed when a force convergence threshold of 5 meV/Å was reached. All further analyses (HOMA index, orbitals, absorption spectra, and broken symmetry calculations) were done for the PBE-optimized geometries.

The Harmonic Oscillator Model of Aromaticity (HOMA) index for an  $n$ -membered ring is defined as:<sup>[10,11]</sup>

$$\text{HOMA} = 1 - \frac{\alpha}{n} \sum_{i=1}^n (R_i - R_{\text{opt}})^2 .$$

$R_i$  (in Å) is the length of the  $i$ -th bond in the analyzed ring.  $R_{\text{opt}} = 1.3976$  Å is the C-C bond length in the PBE-optimized benzene reference molecule, which, therefore, has a HOMA index of 1. The empirical constant  $\alpha = 257.7$  Å<sup>-2</sup> normalizes the index to be unitless, and its value is chosen such that the HOMA index becomes zero for a non-aromatic, hypothetical, perfectly bond alternating Kekulé cyclohexatriene ring.<sup>[10,11]</sup> The HOMA index is an easily accessible geometric measure for local deviations from global aromaticity. Values much smaller than 1, close to zero, or even with negative sign are indicators of local antiaromatic behavior and increasing biradicaloid character in the ground state.<sup>[12]</sup>

Electronic properties and absorption spectra of the fused porphyrins were determined with the ORCA code,<sup>[13]</sup> using the B3LYP hybrid exchange-correlation functional,<sup>[14,15]</sup> the triple-zeta def2-TZVPP basis set,<sup>[16]</sup> and the RIJCOSX approximation with def2/J auxiliary basis functions.<sup>[17]</sup> Time-dependent density functional theory (TD-DFT) was used for the calculation of excitation energies and absorption spectra. The lowest 150 vertical transitions were included in the TD-DFT calculations. Solvation effects in DCM were taken into account by employing the implicit conductor-like continuum polarization model (C-PCM).<sup>[13]</sup>

The restricted Hartree-Fock (RHF) and the broken symmetry (BS) calculations were also done with the ORCA code using the same basis sets as above. The broken symmetry SCF solution is achieved by first performing an unrestricted Hartree-Fock (UHF) calculation for the triplet state (UHF-T). The orbitals of the triplet state are then used as starting guess for the subsequent unrestricted singlet broken symmetry calculation (UHF-BS). The calculated total energies and the expectation values of the spin operator  $\langle S^2 \rangle$  for the building blocks and the final conjugated molecules are listed in Tables S1 and S2. The BS solutions is always lower in energy than both the triplet and the RHF state, indicating biradicaloid character of all molecules.

**Table S1.** Total energy  $E_{\text{tot}}$  (in Hartree) and spin expectation value  $\langle S^2 \rangle$  of restricted Hartree-Fock (RHF) and unrestricted Hartree-Fock calculations in the triplet (UHF-T) and singlet broken symmetry (UHF-BS) state for the hexabenzocoronene (HBC) and phenyl-fused porphyrin (Ph) building blocks.

|        | Hexabenzocoronene (HBC) |                       | Phenyl-fused porphyrin (Ph) |                       |
|--------|-------------------------|-----------------------|-----------------------------|-----------------------|
|        | $E_{\text{tot}}$        | $\langle S^2 \rangle$ | $E_{\text{tot}}$            | $\langle S^2 \rangle$ |
| RHF    | -2538.79449             | 0.00                  | -4070.46301                 | 0.00                  |
| UHF-T  | -2538.77371             | 5.99                  | -4070.50343                 | 5.82                  |
| UHF-RS | -2538.89566             | 5.40                  | -4070.54653                 | 5.14                  |

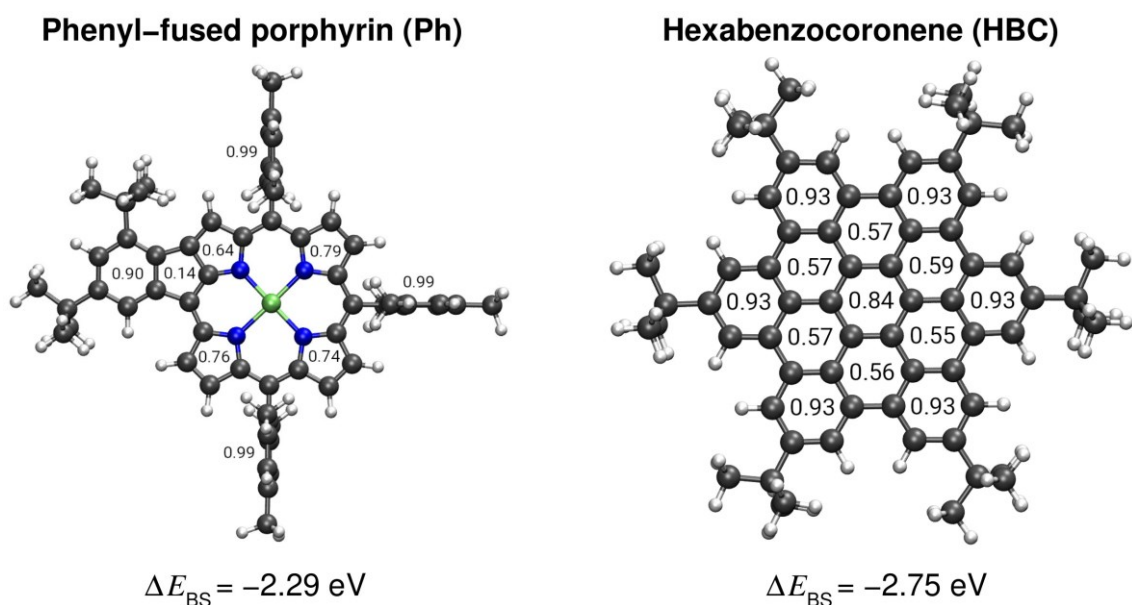

**Figure S71.** HOMA analysis for the phenyl-fused porphyrin and the HBC building block. The low HOMA value of 0.14 for the fused 5-membered ring and the reduced HOMA index of about 0.57 of the 6-membered rings in HBC indicate a tendency to local antiaromaticity and an increasing biradicaloid character of the ground state. This is confirmed by the negative value of the energy difference  $\Delta E_{\text{BS}}$  between the singlet broken-symmetry and the spin-restricted Hartree-Fock calculation.  $\Delta E_{\text{BS}}$  is positive for the initial tetraphenyl porphyrin molecule without fused 5-membered ring.<sup>[12]</sup>

**Table S2.** Total energy  $E_{\text{tot}}$  (in Hartree) and spin expectation value  $\langle S^2 \rangle$  of restricted Hartree-Fock (RHF) and unrestricted Hartree-Fock calculations in the triplet (UHF-T) and singlet broken symmetry (UHF-BS) state for the final conjugated molecules.

|        | <b>o-Ph</b>      |                       | <b>m-Ph</b>      |                       | <b>p-Ph</b>      |                       | <b>tri-Ph</b>    |                       |
|--------|------------------|-----------------------|------------------|-----------------------|------------------|-----------------------|------------------|-----------------------|
|        | $E_{\text{tot}}$ | $\langle S^2 \rangle$ |
| RHF    | -9671.47819      | 0.00                  | -9671.47881      | 0.00                  | -9671.47900      | 0.00                  | -13237.82137     | 0.00                  |
| UHF-T  | -9671.69730      | 15.38                 | -9671.69863      | 15.40                 | -9671.69549      | 15.31                 | -13238.12005     | 19.93                 |
| UHF-RS | -9671.74194      | 14.72                 | -9671.74220      | 14.72                 | -9671.74238      | 14.71                 | -13238.16657     | 19.38                 |

|        | <b>o-HBC</b>     |                       | <b>m-HBC</b>     |                       | <b>p-HBC</b>     |                       | <b>tri-HBC</b>   |                       |
|--------|------------------|-----------------------|------------------|-----------------------|------------------|-----------------------|------------------|-----------------------|
|        | $E_{\text{tot}}$ | $\langle S^2 \rangle$ |
| RHF    | -9281.00201      | 0.00                  | -9281.00465      | 0.00                  | -9281.00183      | 0.00                  | -12652.10641     | 0.00                  |
| UHF-T  | -9281.16149      | 14.86                 | -9281.22886      | 15.28                 | -9281.21529      | 15.23                 | -12652.37945     | 19.49                 |
| UHF-RS | -9281.26967      | 14.53                 | -9281.27320      | 14.54                 | -9281.27060      | 14.55                 | -12652.45824     | 19.14                 |

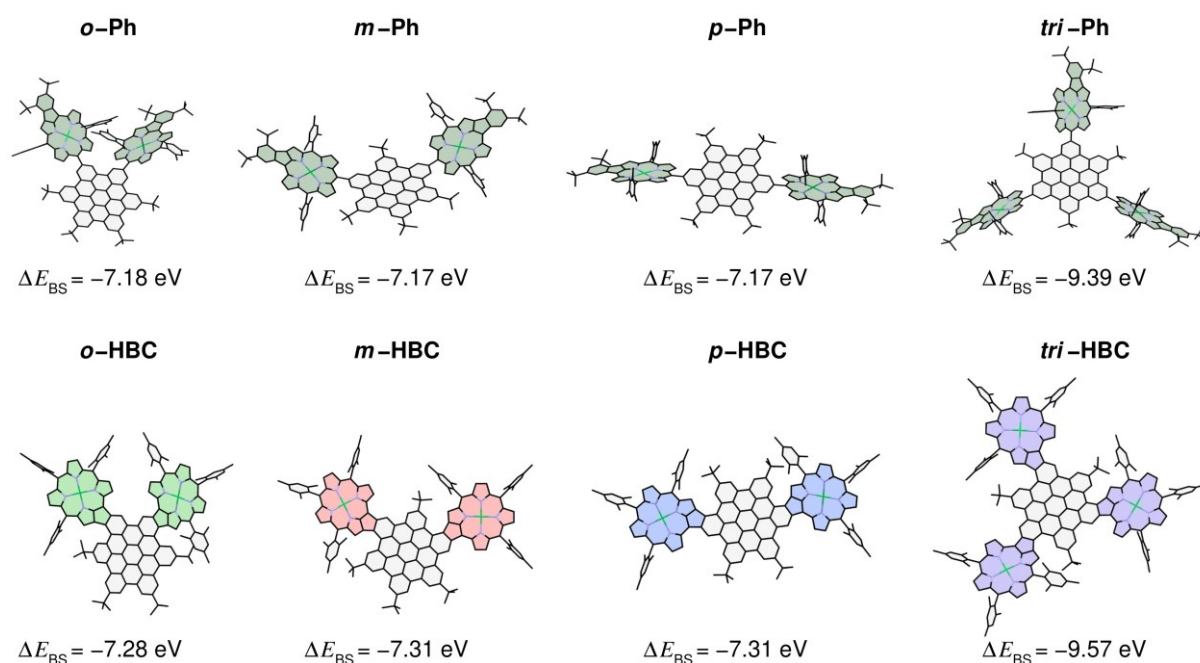

**Figure S72.** Energy difference  $\Delta E_{\text{BS}}$  between the singlet broken-symmetry and the spin-restricted Hartree-Fock calculation of the final conjugated molecules.  $\Delta E_{\text{BS}}$  is basically independent of the relative position of the porphyrins and is roughly the sum of the  $\Delta E_{\text{BS}}$  values of the building blocks (*bi*-conjugates:  $-(2 \times 2.29 + 2.75)$  eV =  $-7.33$  eV; *tri*-conjugates:  $-(3 \times 2.29 + 2.75)$  eV =  $-9.62$  eV). The small deviations from this sum indicate that the position of the fused 5-membered ring (at the outer periphery of the porphyrin or between porphyrin and HBC) has only a small impact on the biradicaloid character of the fused porphyrin and the HBC.

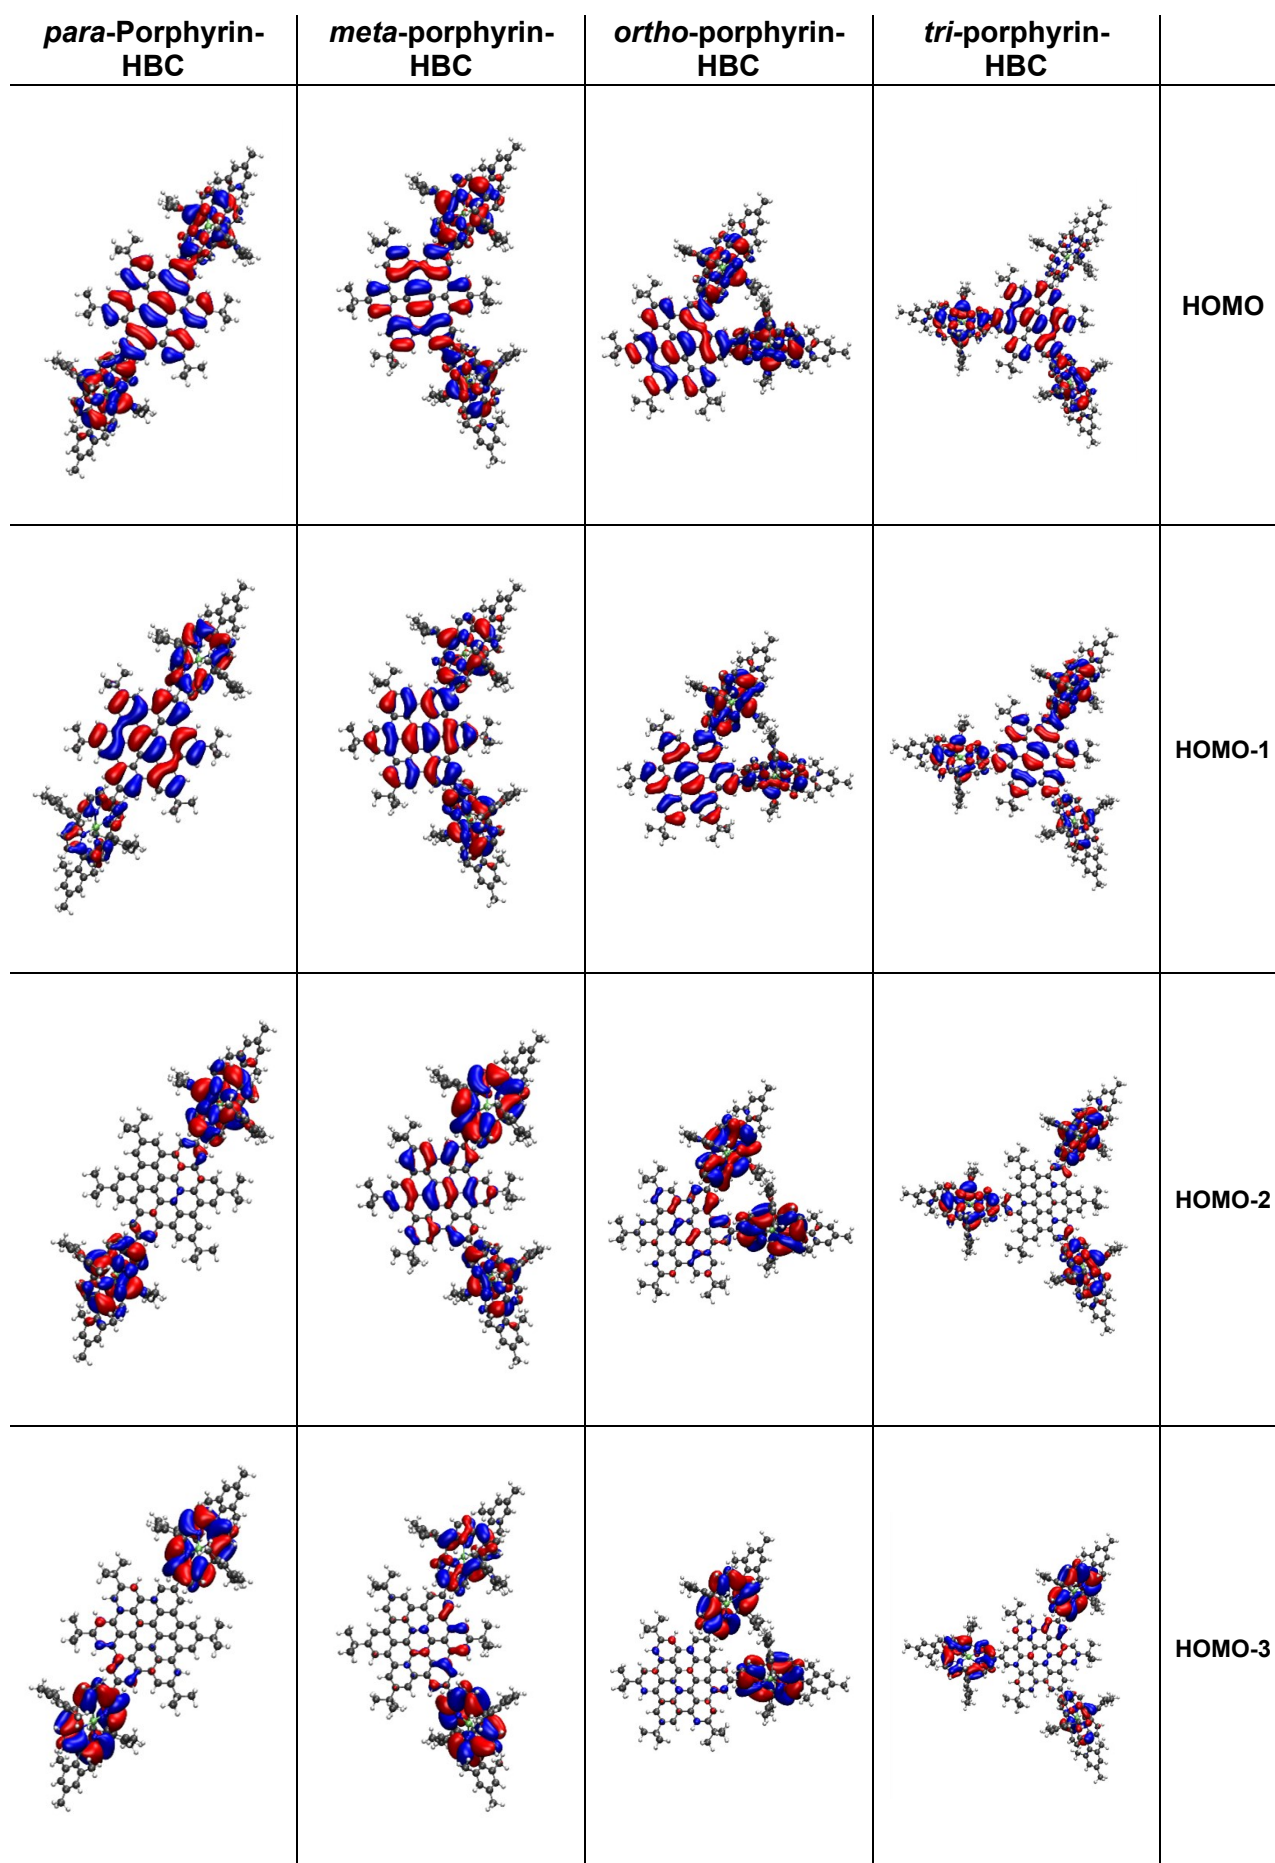

Figure S73. Geometry optimized structures of porphyrin-HBCs 11-14.

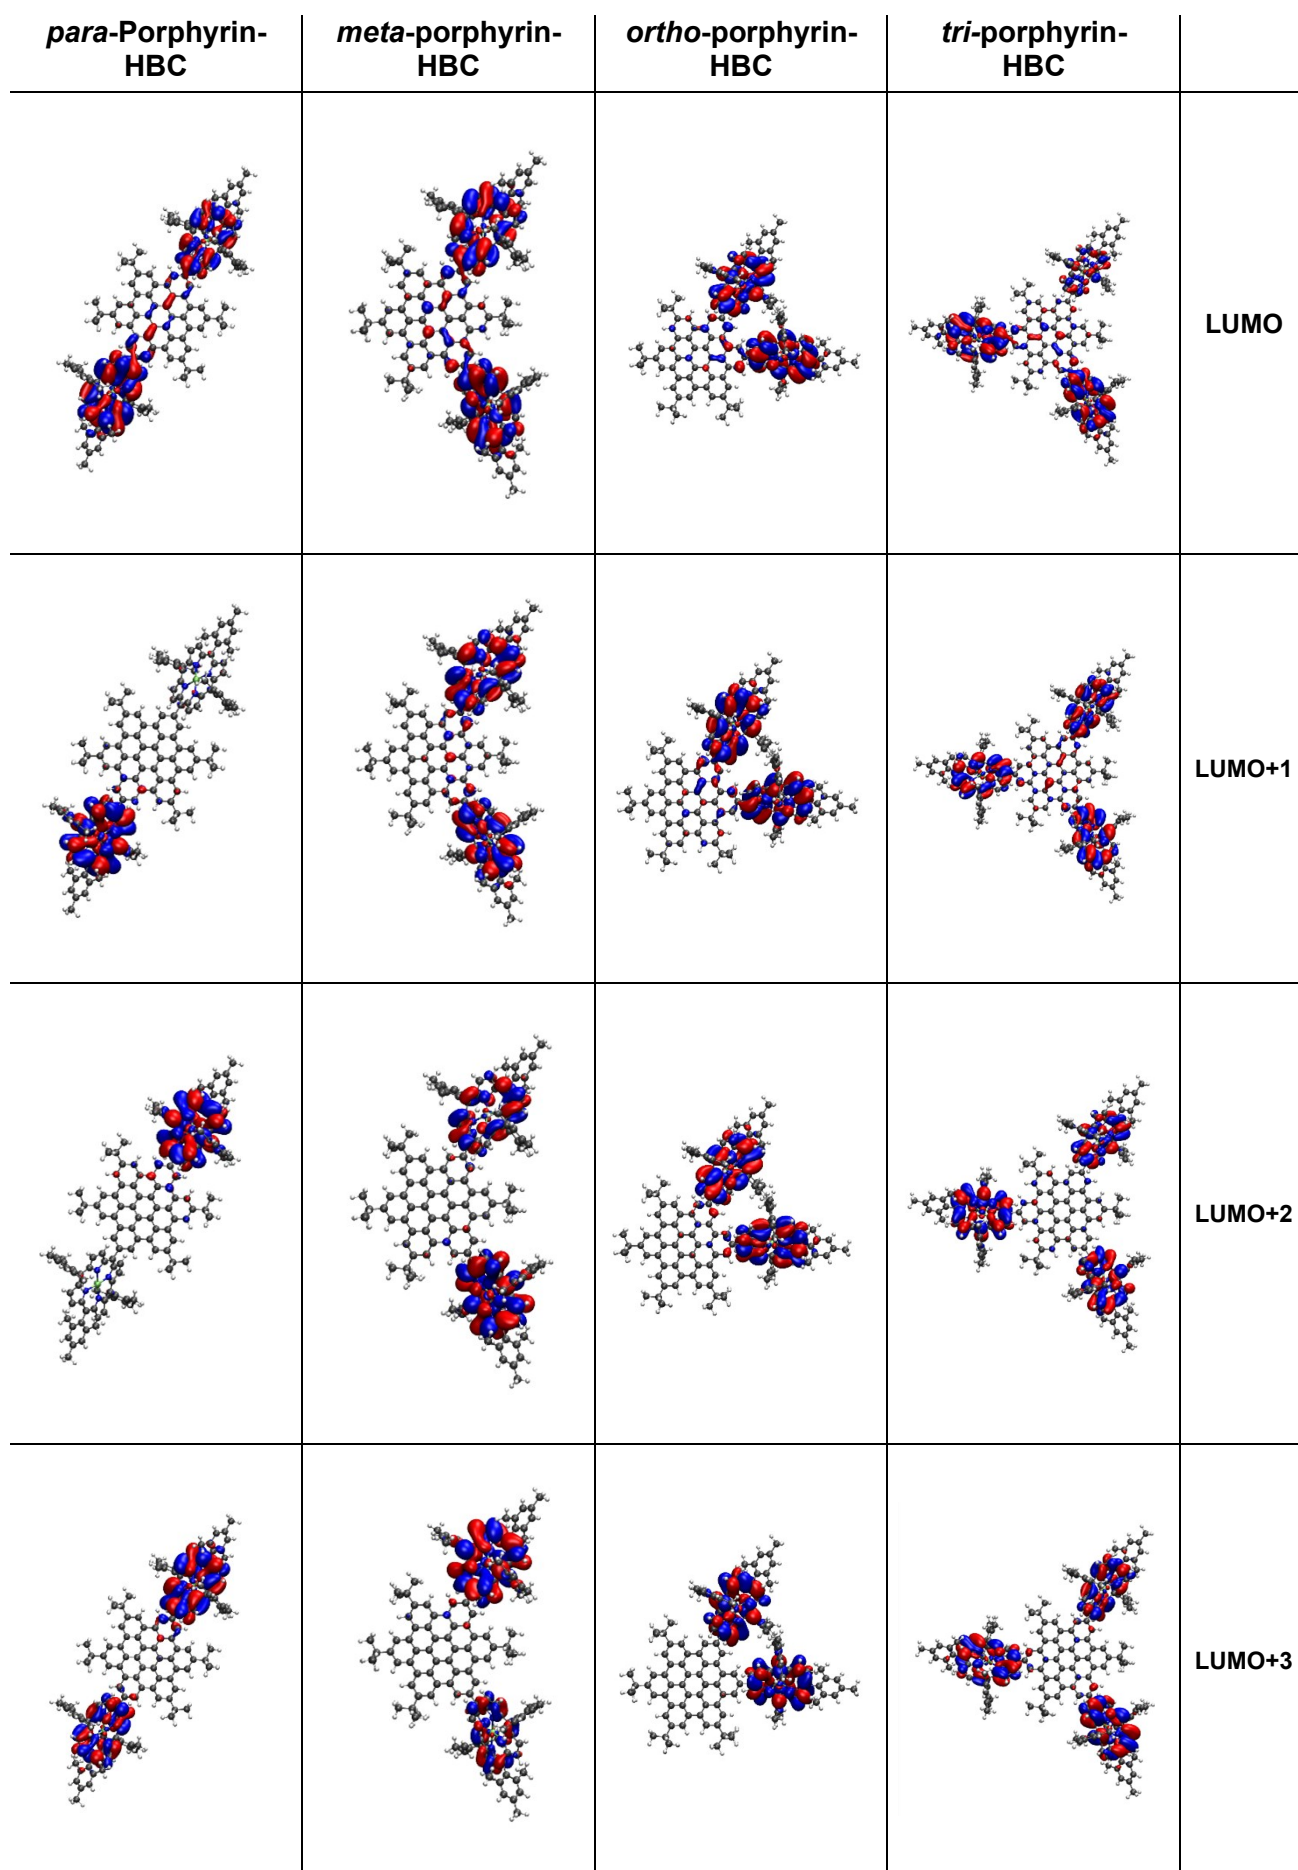

**Figure S74.** Geometry optimized structures of porphyrin-HBCs 11-14.

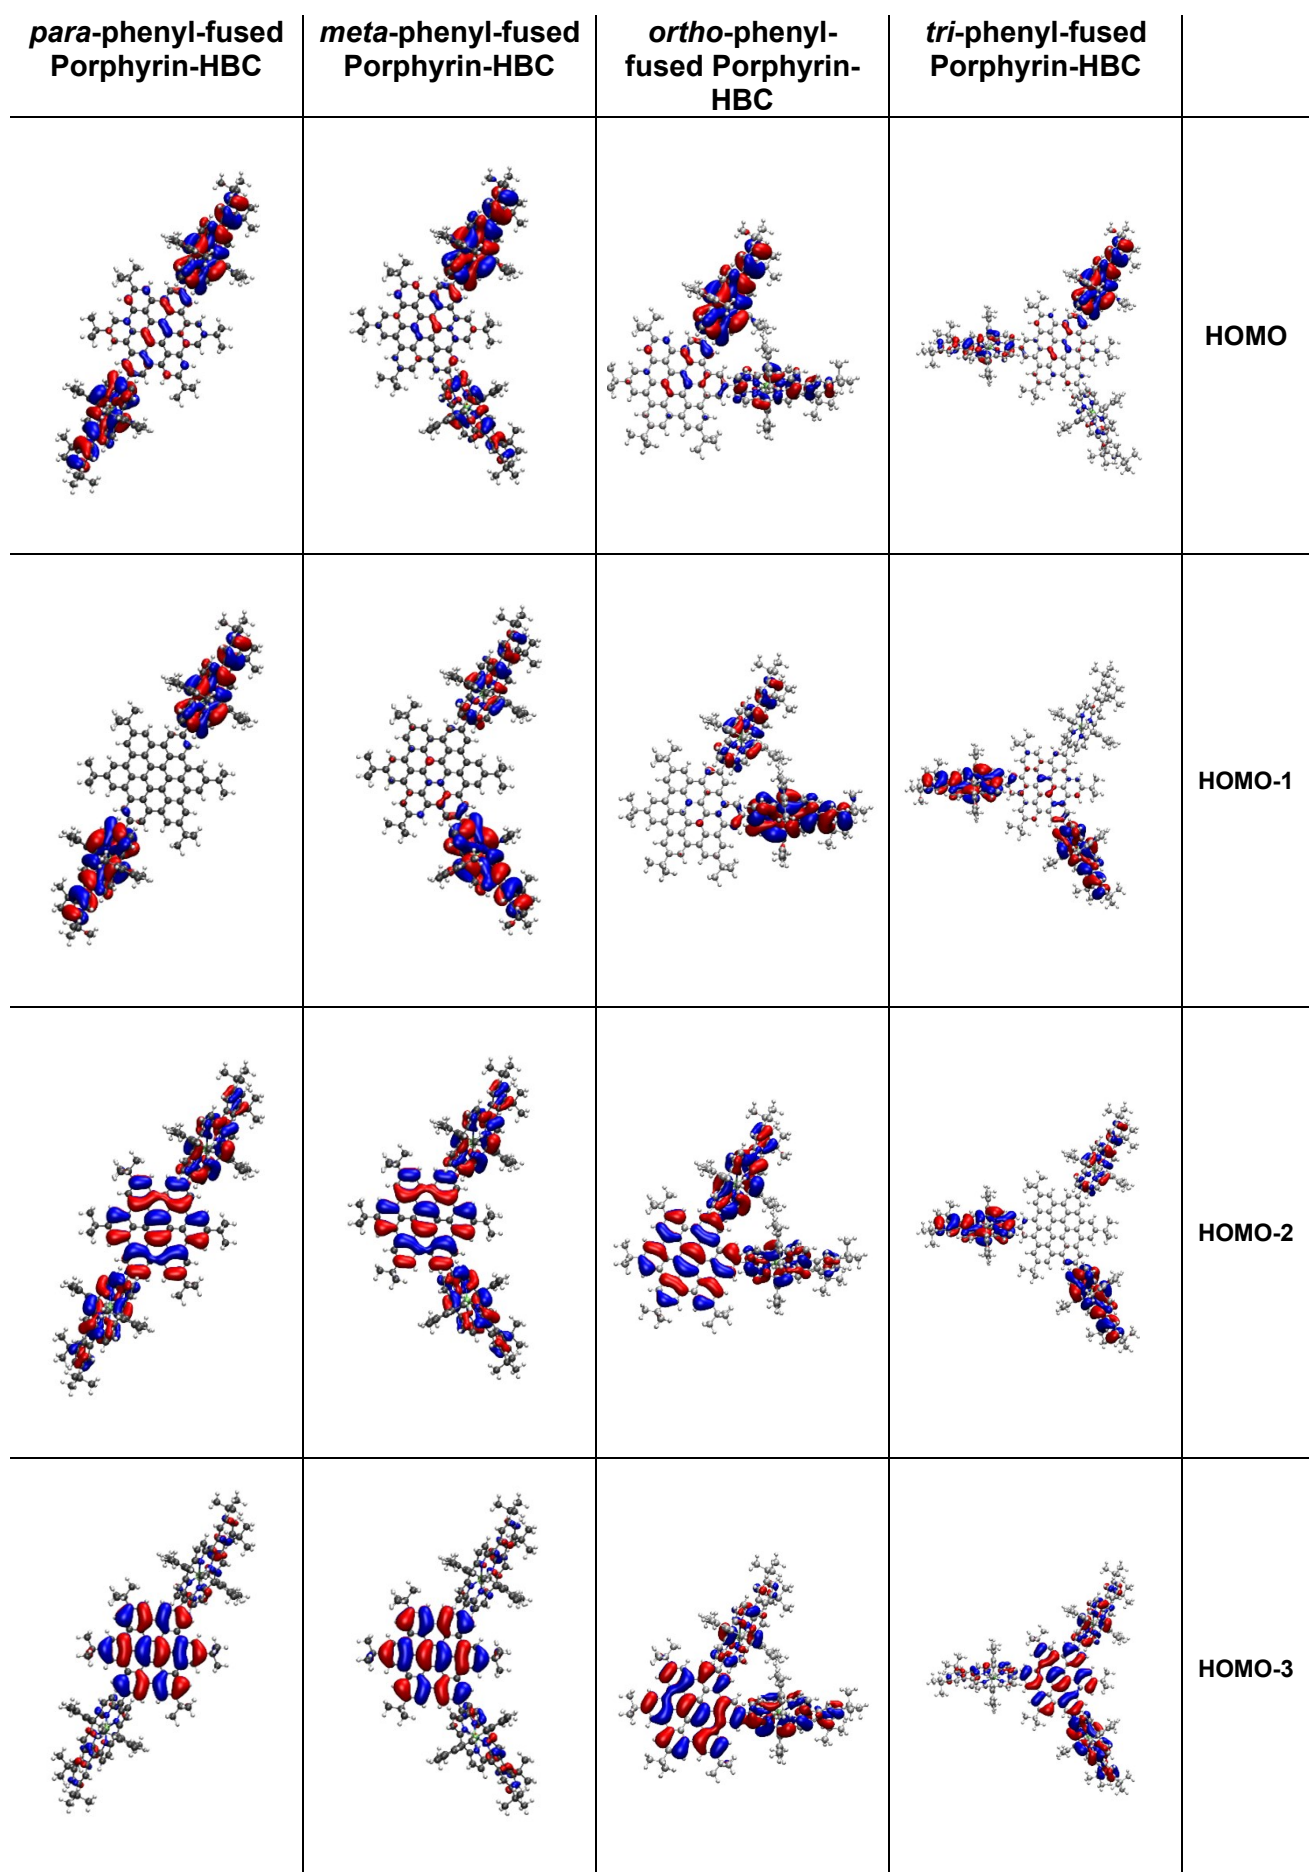

Figure S75. Geometry optimized structures of porphyrin-HBCs *p*-Ph, *m*-Ph, *o*-Ph, *tri*-Ph.

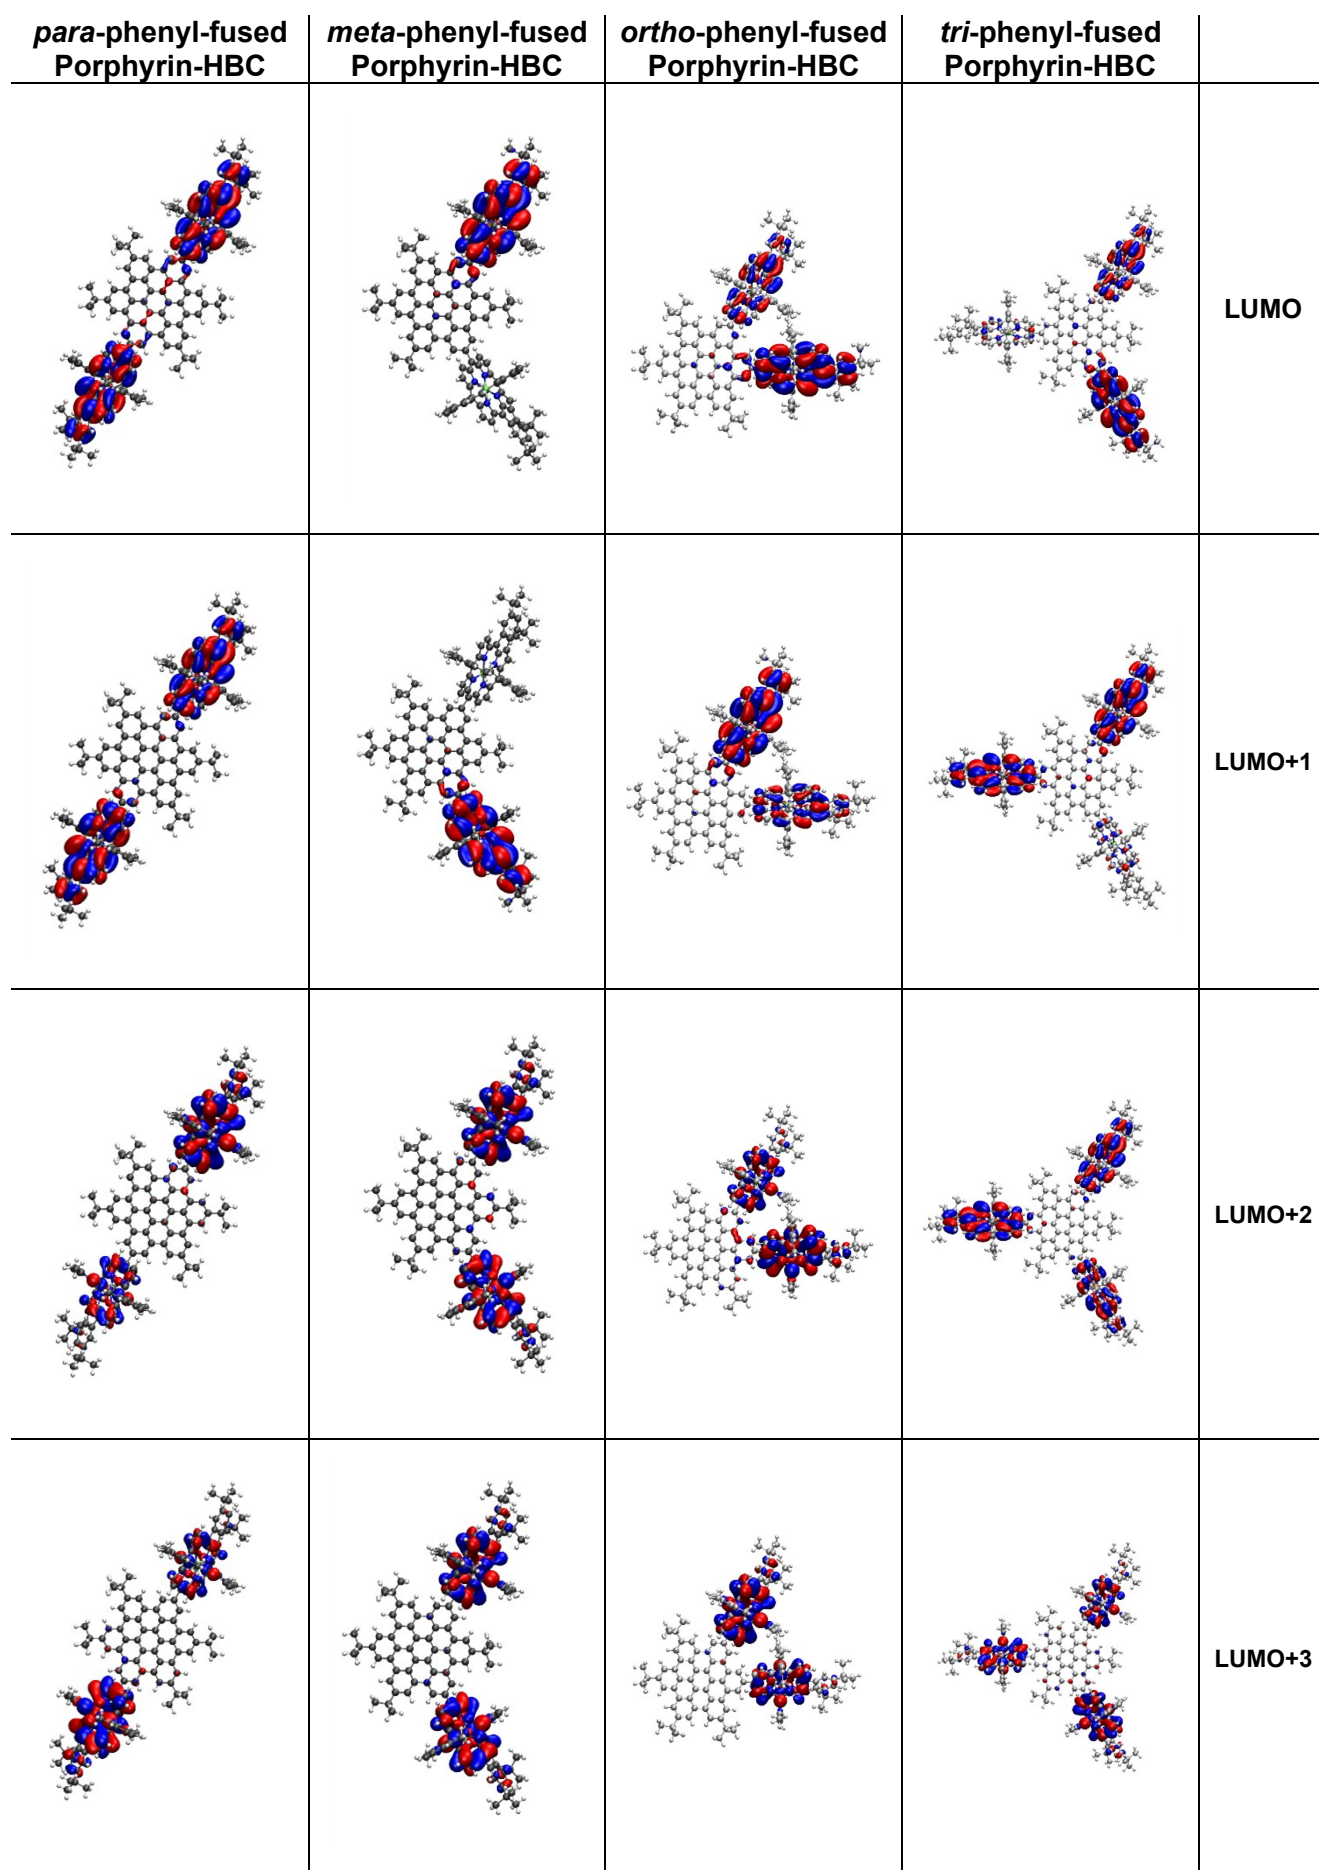

Figure S76. Geometry optimized structures of porphyrin-HBCs *p*-Ph, *m*-Ph, *o*-Ph, *tri*-Ph.

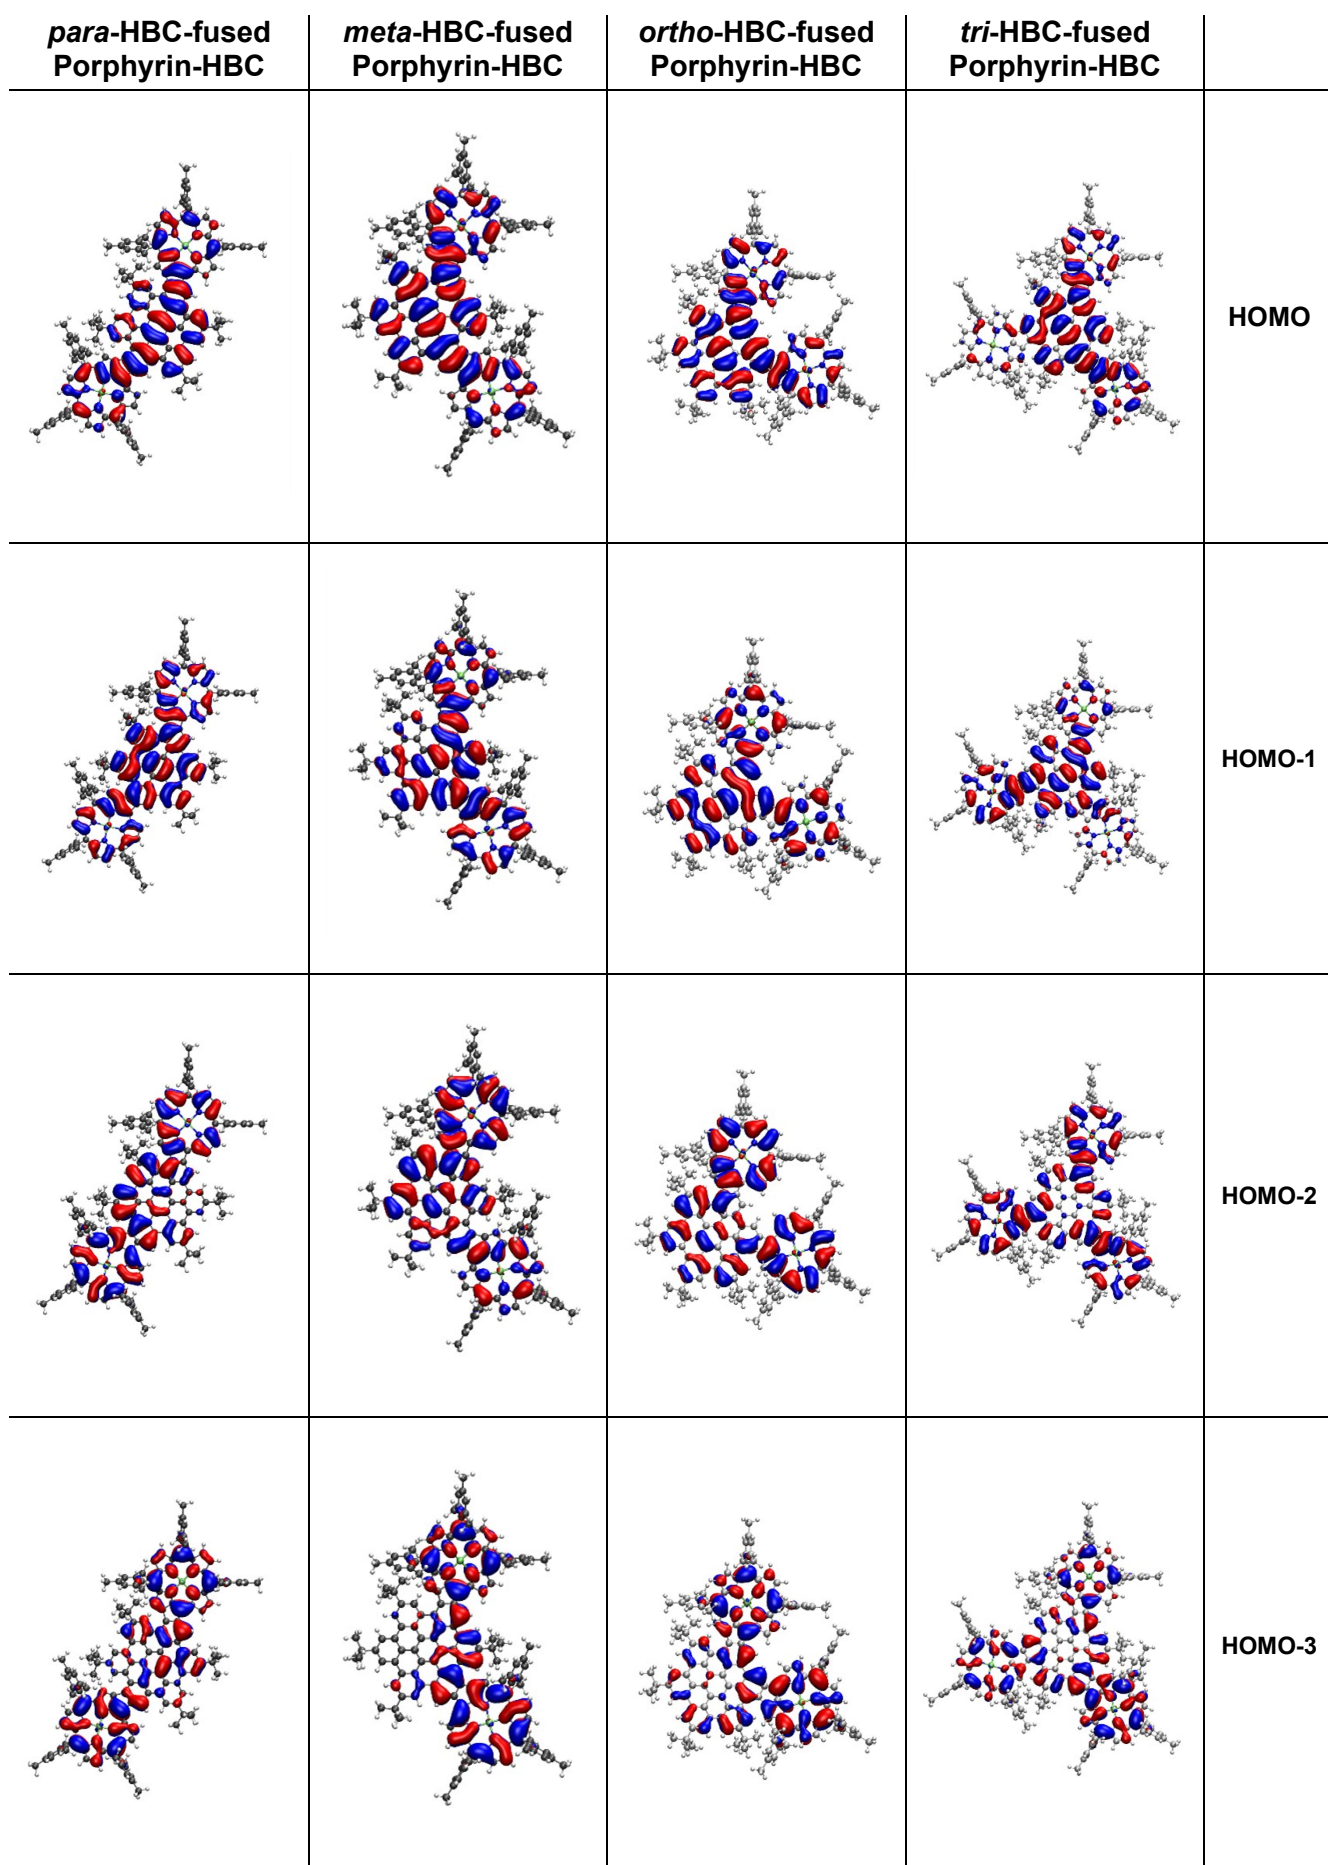

Figure S77. Geometry optimized structures of porphyrin-HBCs *p*-HBC, *m*-HBC, *o*-HBC, *tri*-HBC.



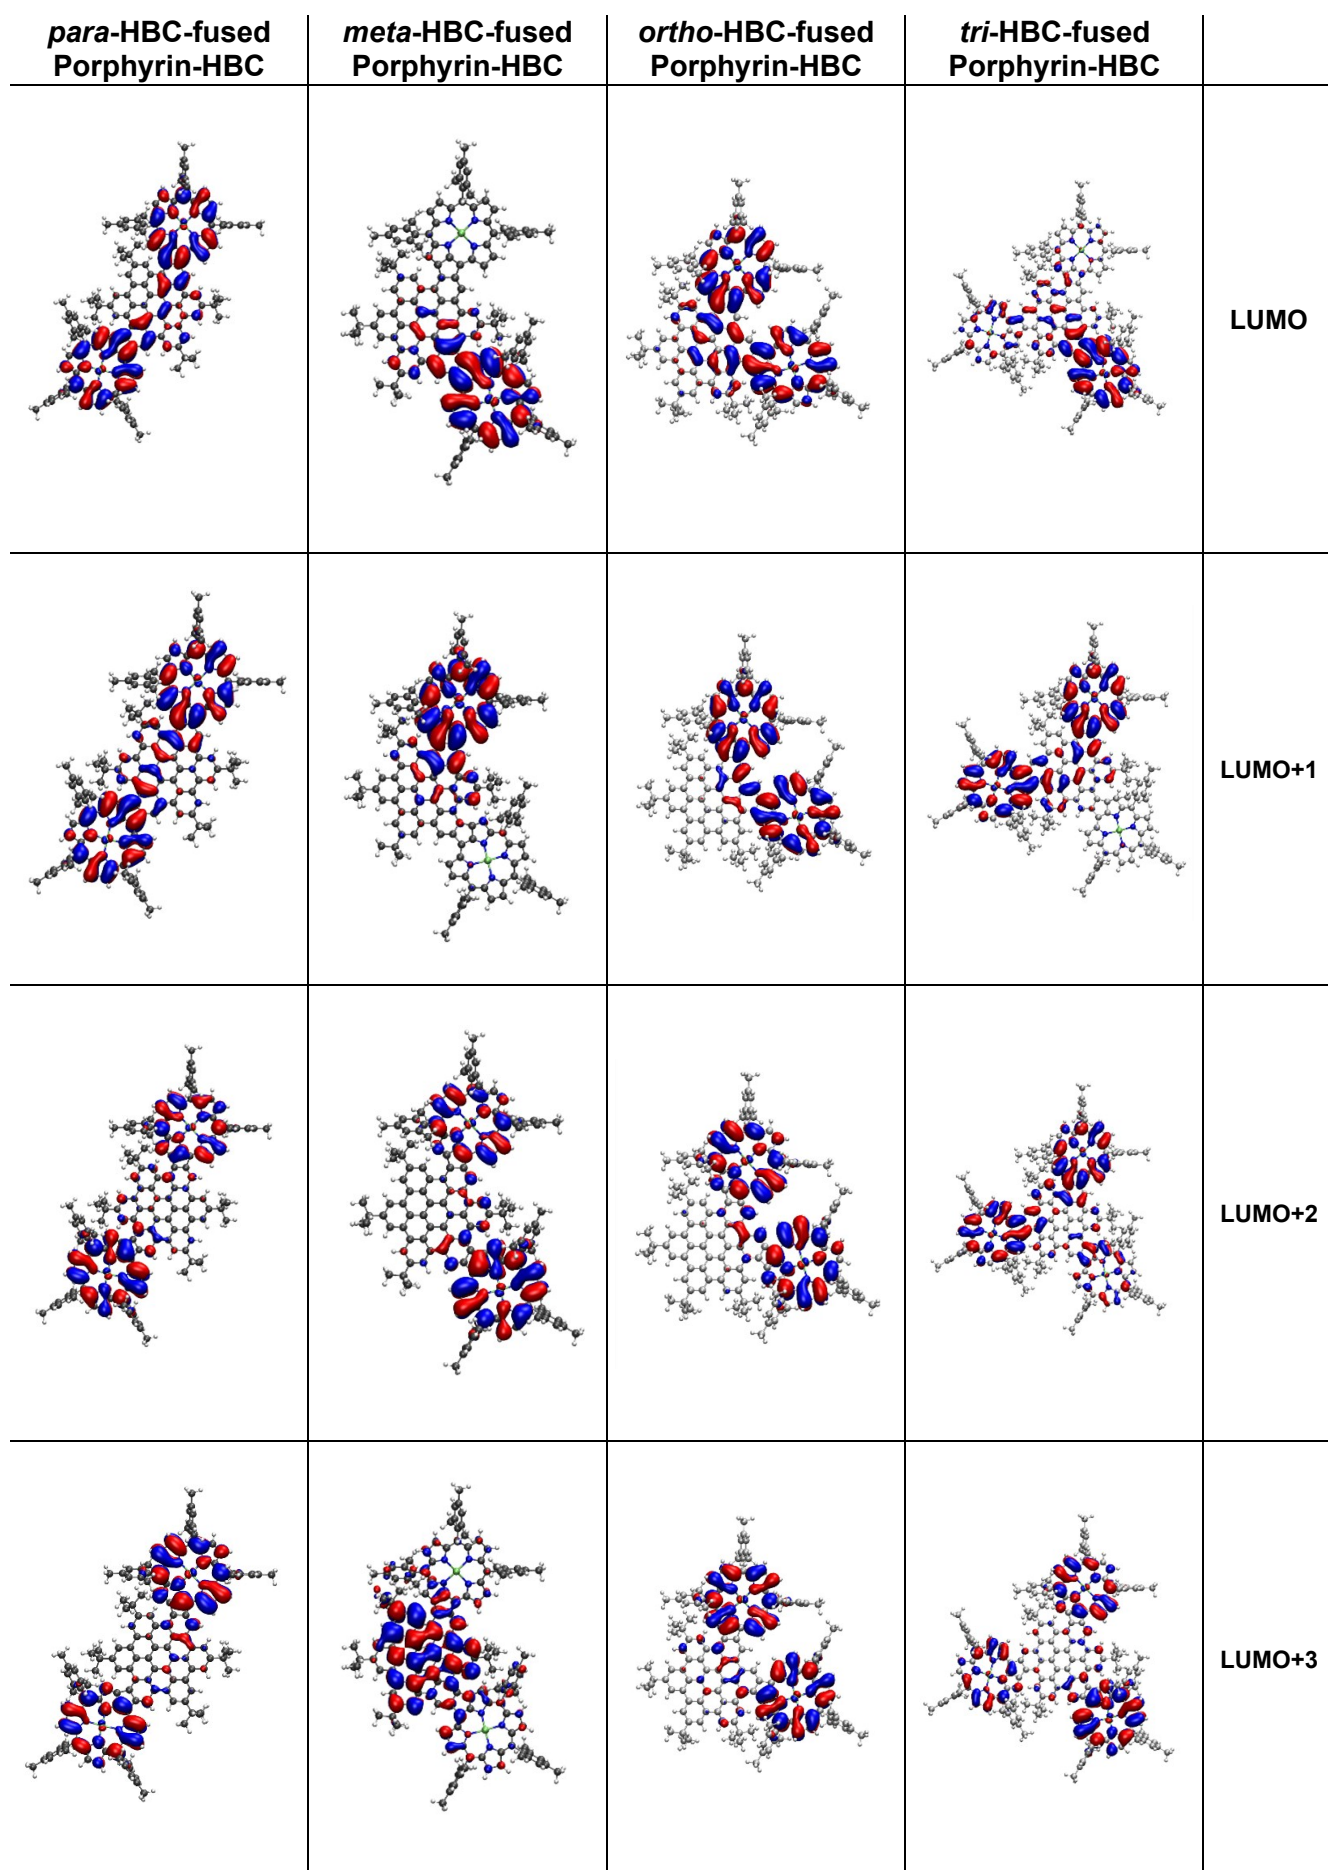

Figure S78. Geometry optimized structures of porphyrin-HBCs *p*-HBC, *m*-HBC, *o*-HBC, *tri*-HBC.

**Table S3.** Energy Values of porphyrin-HBCs 11-14.

| <i>para</i> -Porphyrin-HBC |             | <i>meta</i> -porphyrin-HBC |             | <i>ortho</i> -porphyrin-HBC |             | <i>tri</i> -porphyrin-HBC |             |
|----------------------------|-------------|----------------------------|-------------|-----------------------------|-------------|---------------------------|-------------|
| Orbital                    | Energy (eV) | Orbital                    | Energy (eV) | Orbital                     | Energy (eV) | Orbital                   | Energy (eV) |
| HOMO-3                     | -5.327      | HOMO-3                     | -5.326      | HOMO-3                      | -5.301      | HOMO-3                    | -5.324      |
| HOMO-2                     | -5.262      | HOMO-2                     | -5.287      | HOMO-2                      | -5.267      | HOMO-2                    | -5.257      |
| HOMO-1                     | -5.220      | HOMO-1                     | -5.171      | HOMO-1                      | -5.181      | HOMO-1                    | -5.176      |
| HOMO                       | -5.135      | HOMO                       | -5.132      | HOMO                        | -5.145      | HOMO                      | -5.160      |
| LUMO                       | -2.344      | LUMO                       | -2.344      | LUMO                        | -2.304      | LUMO                      | -2.351      |
| LUMO+1                     | -2.321      | LUMO+1                     | -2.332      | LUMO+1                      | -2.298      | LUMO+1                    | -2.344      |
| LUMO+2                     | -2.309      | LUMO+2                     | -2.319      | LUMO+2                      | -2.277      | LUMO+2                    | -2.329      |
| LUMO+3                     | -2.298      | LUMO+3                     | -2.311      | LUMO+3                      | -2.270      | LUMO+3                    | -2.323      |
| GAP                        | 2.791       | GAP                        | 2.788       | GAP                         | 2.840       | GAP                       | 2.810       |

**Table S4.** Energy Values for. porphyrin-HBCs *p*-Ph, *m*-Ph, *o*-Ph, *tri*-Ph.

| <i>p</i> -Ph |             | <i>m</i> -Ph |             | <i>o</i> -Ph |             | <i>tri</i> -Ph |             |
|--------------|-------------|--------------|-------------|--------------|-------------|----------------|-------------|
| Orbital      | Energy (eV) | Orbital      | Energy (eV) | Orbital      | Energy (eV) | Orbital        | Energy (eV) |
| HOMO-3       | -5.286      | HOMO-3       | -5.300      | HOMO-3       | -5.260      | HOMO-3         | -5.275      |
| HOMO-2       | -5.236      | HOMO-2       | -5.224      | HOMO-2       | -5.233      | HOMO-2         | -5.048      |
| HOMO-1       | -5.040      | HOMO-1       | -5.035      | HOMO-1       | -5.012      | HOMO-1         | -5.036      |
| HOMO         | -5.013      | HOMO         | -5.020      | HOMO         | -4.988      | HOMO           | -5.032      |
| LUMO         | -2.639      | LUMO         | -2.627      | LUMO         | -2.613      | LUMO           | -2.641      |
| LUMO+1       | -2.617      | LUMO+1       | -2.626      | LUMO+1       | -2.594      | LUMO+1         | -2.638      |
| LUMO+2       | -2.351      | LUMO+2       | -2.350      | LUMO+2       | -2.332      | LUMO+2         | -2.632      |
| LUMO+3       | -2.347      | LUMO+3       | -2.342      | LUMO+3       | -2.308      | LUMO+3         | -2.360      |
| GAP          | 2.374       | GAP          | 2.393       | GAP          | 2.375       | GAP            | 2.391       |

**Table S5.** Energy Values for porphyrin-HBCs *p*-HBC, *m*-HBC, *o*-HBC, *tri*-HBC.

| <i>p</i> -HBC |             | <i>m</i> -HBC |             | <i>o</i> -HBC |             | <i>tri</i> -HBC |             |
|---------------|-------------|---------------|-------------|---------------|-------------|-----------------|-------------|
| Orbital       | Energy (eV) | Orbital       | Energy (eV) | Orbital       | Energy (eV) | Orbital         | Energy (eV) |
| HOMO-3        | -5.254      | HOMO-3        | -5.297      | HOMO-3        | -5.314      | HOMO-3          | -5.290      |
| HOMO-2        | -5.227      | HOMO-2        | -5.185      | HOMO-2        | -5.268      | HOMO-2          | -5.033      |
| HOMO-1        | -4.926      | HOMO-1        | -4.922      | HOMO-1        | -4.978      | HOMO-1          | -4.835      |
| HOMO          | -4.839      | HOMO          | -4.844      | HOMO          | -4.780      | HOMO            | -4.834      |
| LUMO          | -2.745      | LUMO          | -2.717      | LUMO          | -2.788      | LUMO            | -2.724      |
| LUMO+1        | -2.687      | LUMO+1        | -2.709      | LUMO+1        | -2.647      | LUMO+1          | -2.716      |
| LUMO+2        | -2.413      | LUMO+2        | -2.408      | LUMO+2        | -2.421      | LUMO+2          | -2.713      |
| LUMO+3        | -2.402      | LUMO+3        | -2.399      | LUMO+3        | -2.369      | LUMO+3          | -2.412      |
| GAP           | 2.094       | GAP           | 2.127       | GAP           | 1.992       | GAP             | 2.111       |

# Calculated Absorption Spectra

## *ortho*-HBC-fused porphyrin-HBC *o*-HBC

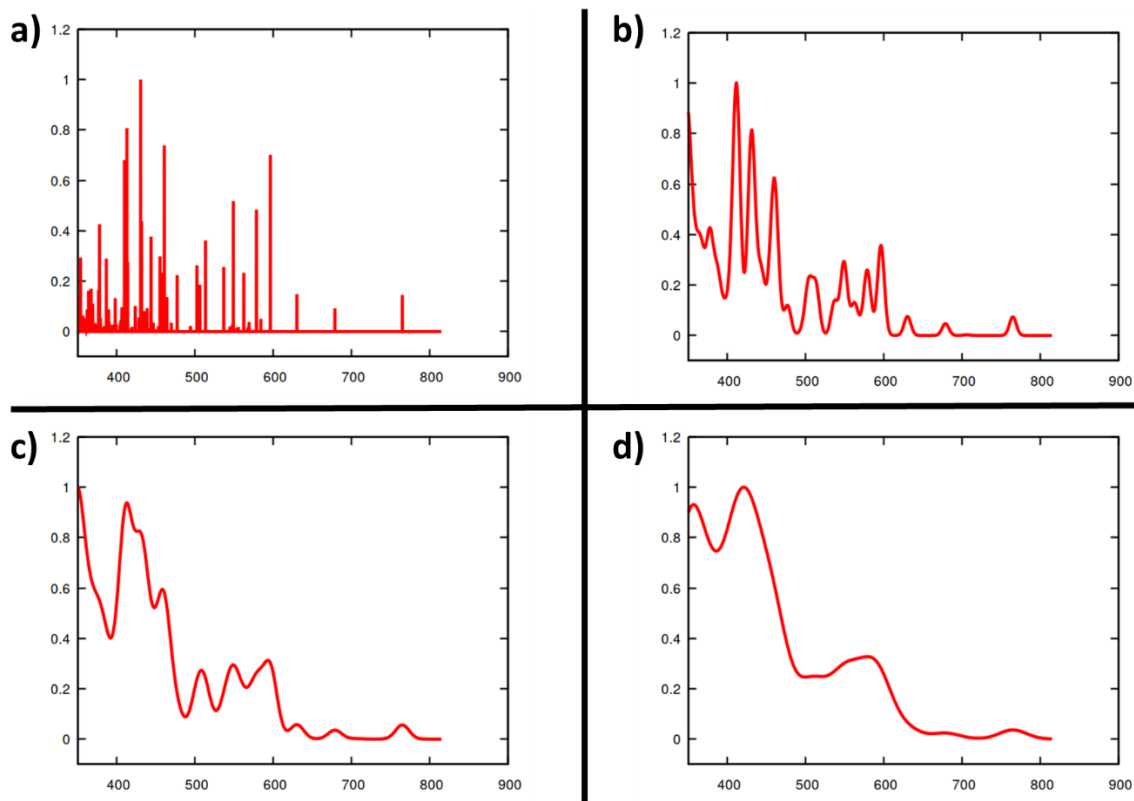

**Figure S79.** DFT-calculated transitions for *o*-HBC with increasing broadening factor  $\sigma$ : a) no broadening, b) 5 nm, c) 10 nm, d) 20 nm.

**Table S6.** TD-DFT excitation energies and oscillator strengths of *o*-HBC.

| Excited state | Energy (nm) | Energy (eV) | Oscillator strength $f$ | Excited state | Energy (nm) | Energy (eV) | Oscillator strength $f$ |
|---------------|-------------|-------------|-------------------------|---------------|-------------|-------------|-------------------------|
| 1             | 764.9       | 1.621       | 0.1229                  | 16            | 544.5       | 2.277       | 0.0163                  |
| 2             | 705.7       | 1.757       | 0.0044                  | 17            | 536.6       | 2.311       | 0.2169                  |
| 3             | 678.7       | 1.827       | 0.078                   | 18            | 522.5       | 2.373       | 0.0022                  |
| 4             | 630.1       | 1.968       | 0.1256                  | 19            | 513.3       | 2.415       | 0.3061                  |
| 5             | 596.2       | 2.080       | 0.5943                  | 20            | 506.0       | 2.450       | 0.1576                  |
| 6             | 584.0       | 2.123       | 0.0426                  | 21            | 502.4       | 2.468       | 0.2225                  |
| 7             | 578.4       | 2.144       | 0.4098                  | 22            | 494.1       | 2.509       | 0.0187                  |
| 8             | 569.1       | 2.179       | 0.0322                  | 23            | 477.0       | 2.599       | 0.1897                  |
| 9             | 566.6       | 2.188       | 0.0008                  | 24            | 472.0       | 2.627       | 0.0001                  |
| 10            | 562.3       | 2.205       | 0.1973                  | 25            | 470.4       | 2.636       | 0.0001                  |
| 11            | 561.3       | 2.209       | 0                       | 26            | 469.5       | 2.641       | 0.0294                  |
| 12            | 555.2       | 2.233       | 0.0151                  | 27            | 463.9       | 2.673       | 0.1159                  |
| 13            | 553.2       | 2.241       | 0.0124                  | 28            | 460.5       | 2.692       | 0.6259                  |
| 14            | 548.9       | 2.259       | 0.439                   | 29            | 459.2       | 2.700       | 0.1987                  |
| 15            | 547.4       | 2.265       | 0.0228                  | 30            | 455.1       | 2.724       | 0.2526                  |

**Table S7.** Orbital transitions and their relative contributions to optically active excitations with large oscillator strengths from the TD-DFT calculations of **o-HBC**. Only transitions with contributions exceeding 10% are listed.

| State | Energy (eV) | Transition      | Contribution (%) |
|-------|-------------|-----------------|------------------|
| 1     | 1.621       | HOMO → LUMO     | 92.1             |
| 4     | 1.968       | HOMO-1 → LUMO+1 | 40.1             |
|       |             | HOMO → LUMO+2   | 38.9             |
| 5     | 2.080       | HOMO-3 → LUMO   | 16.3             |
|       |             | HOMO-1 → LUMO+1 | 48.7             |
|       |             | HOMO → LUMO+2   | 21.2             |
| 7     | 2.144       | HOMO-3 → LUMO+1 | 11.2             |
|       |             | HOMO-1 → LUMO   | 12.1             |
|       |             | HOMO → LUMO+3   | 49.5             |
| 10    | 2.205       | HOMO-4 → LUMO   | 16.7             |
|       |             | HOMO-3 → LUMO   | 10.7             |
|       |             | HOMO-2 → LUMO+1 | 23.8             |
|       |             | HOMO-1 → LUMO+3 | 12.4             |
|       |             | HOMO → LUMO+2   | 19.8             |
| 14    | 2.259       | HOMO-4 → LUMO   | 36.8             |
|       |             | HOMO-3 → LUMO   | 20.6             |
|       |             | HOMO → LUMO+2   | 14.3             |

**meta-HBC-fused porphyrin-HBC *m*-HBC**

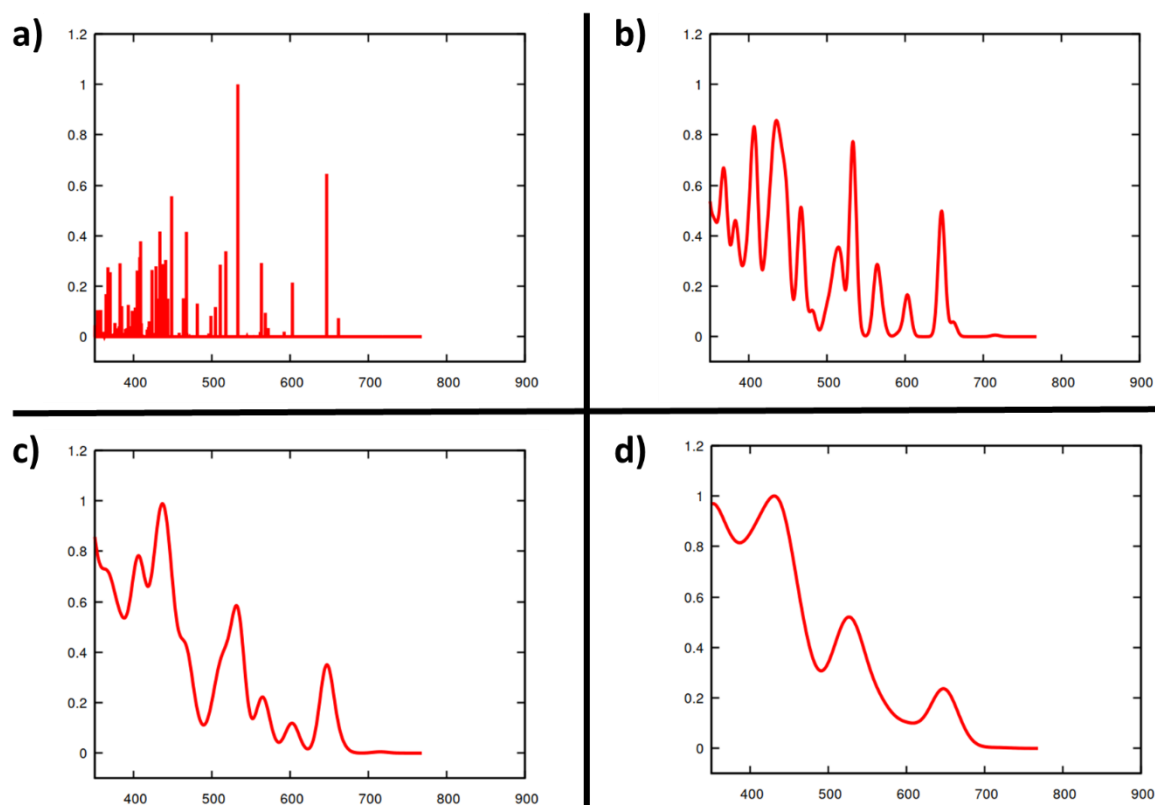

**Figure S80.** DFT-calculated transitions for ***m*-HBC** with increasing broadening factor  $\sigma$ : a) no broadening, b) 5 nm, c) 10 nm, d) 20 nm.

**Table S8.** TD-DFT excitation energies and oscillator strengths of *m*-HBC.

| Excited state | Energy (nm) | Energy (eV) | Oscillator strength <i>f</i> | Excited state | Energy (nm) | Energy (eV) | Oscillator strength <i>f</i> |
|---------------|-------------|-------------|------------------------------|---------------|-------------|-------------|------------------------------|
| 1             | 718.2       | 1.726       | 0.0046                       | 16            | 540.3       | 2.295       | 0.0061                       |
| 2             | 712.8       | 1.739       | 0.0056                       | 17            | 532.9       | 2.327       | 1.0076                       |
| 3             | 661.6       | 1.874       | 0.0744                       | 18            | 517.6       | 2.395       | 0.3411                       |
| 4             | 646.5       | 1.918       | 0.65                         | 19            | 510.5       | 2.429       | 0.2876                       |
| 5             | 602.7       | 2.057       | 0.2159                       | 20            | 504.3       | 2.458       | 0.1184                       |
| 6             | 592.2       | 2.094       | 0.02                         | 21            | 498.6       | 2.486       | 0.0835                       |
| 7             | 571.7       | 2.169       | 0.0345                       | 22            | 495.9       | 2.500       | 0.013                        |
| 8             | 569.5       | 2.177       | 0.0003                       | 23            | 481.1       | 2.577       | 0.1324                       |
| 9             | 568.1       | 2.182       | 0.0953                       | 24            | 471.3       | 2.631       | 0.0005                       |
| 10            | 563.1       | 2.202       | 0.2943                       | 25            | 467.8       | 2.65        | 0.0138                       |
| 11            | 562.2       | 2.205       | 0.0004                       | 26            | 467.2       | 2.654       | 0.4184                       |
| 12            | 561.7       | 2.207       | 0.0189                       | 27            | 466.8       | 2.656       | 0.1233                       |
| 13            | 558.1       | 2.221       | 0.0001                       | 28            | 463.3       | 2.676       | 0.1531                       |
| 14            | 553.3       | 2.241       | 0.0001                       | 29            | 457.9       | 2.708       | 0.0153                       |
| 15            | 544.7       | 2.276       | 0.0008                       | 30            | 455.7       | 2.721       | 0.005                        |

**Table S9.** Orbital transitions and their relative contributions to optically active excitations with large oscillator strengths from the TD-DFT calculations of *m*-HBC. Only transitions with contributions exceeding 10% are listed.

| State | Energy (eV) | Transition      | Contribution (%) |
|-------|-------------|-----------------|------------------|
| 1     | 1.726       | HOMO-1 → LUMO+1 | 19.9             |
|       |             | HOMO → LUMO     | 46.2             |
|       |             | HOMO → LUMO+1   | 18.5             |
| 4     | 1.918       | HOMO-1 → LUMO+1 | 57.6             |
|       |             | HOMO → LUMO     | 16.2             |
| 5     | 2.057       | HOMO-2 → LUMO+1 | 26.9             |
|       |             | HOMO-1 → LUMO+3 | 14.2             |
|       |             | HOMO → LUMO+2   | 23.7             |
| 10    | 2.202       | HOMO-3 → LUMO+1 | 21.7             |
|       |             | HOMO-2 → LUMO+1 | 21.9             |
|       |             | HOMO → LUMO+3   | 14.7             |
| 17    | 2.327       | HOMO-3 → LUMO   | 24.1             |
|       |             | HOMO-3 → LUMO+1 | 20.4             |
|       |             | HOMO → LUMO+2   | 13.6             |

**para-HBC-fused porphyrin-HBC *p*-HBC**

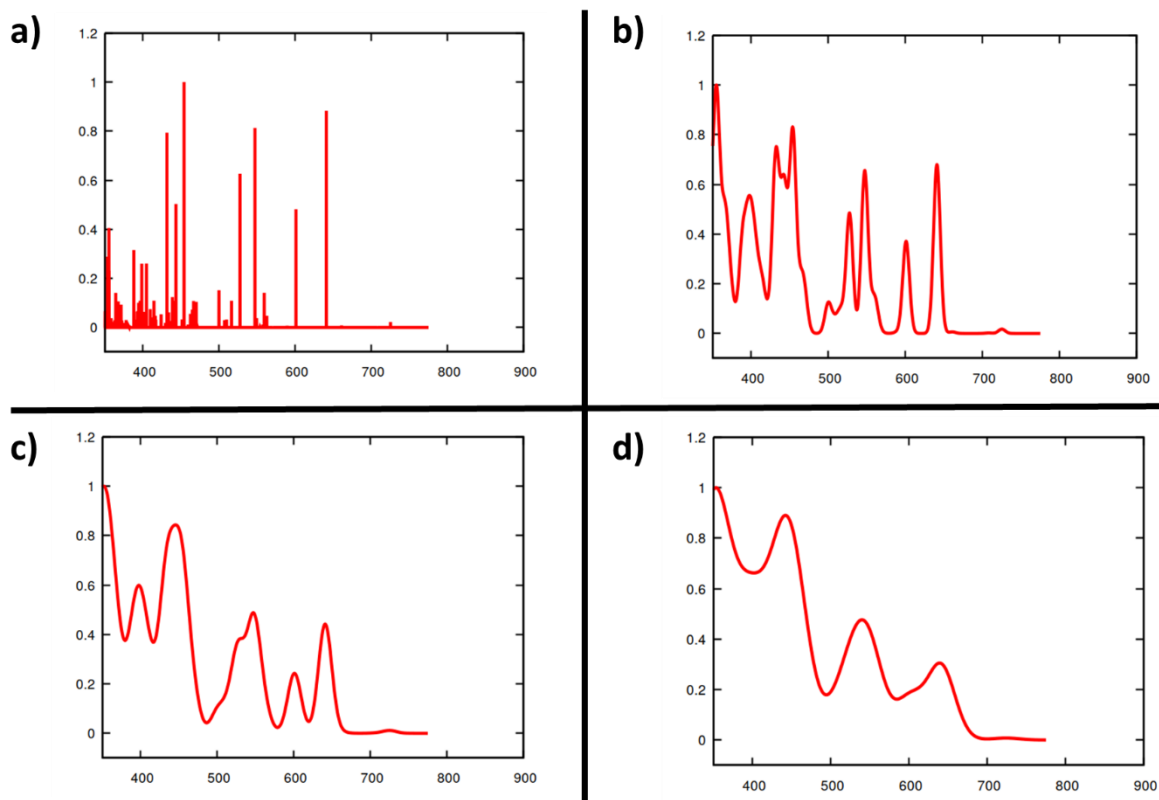

**Figure S81.** DFT-calculated transitions for *p*-HBC with increasing broadening factor  $\sigma$ : a) no broadening, b) 5 nm, c) 10 nm, d) 20 nm.

**Table S10.** TD-DFT excitation energies and oscillator strengths of *p*-HBC.

| Excited state | Energy (nm) | Energy (eV) | Oscillator strength $f$ | Excited state | Energy (nm) | Energy (eV) | Oscillator strength $f$ |
|---------------|-------------|-------------|-------------------------|---------------|-------------|-------------|-------------------------|
| 1             | 725.2       | 1.710       | 0.0234                  | 16            | 539.2       | 2.299       | 0.006                   |
| 2             | 708.1       | 1.751       | 0.0027                  | 17            | 527.5       | 2.350       | 0.6525                  |
| 3             | 660.8       | 1.876       | 0.0085                  | 18            | 516.3       | 2.401       | 0.1136                  |
| 4             | 640.9       | 1.934       | 0.9203                  | 19            | 509.7       | 2.432       | 0.0332                  |
| 5             | 600.9       | 2.063       | 0.5021                  | 20            | 507.2       | 2.444       | 0.0306                  |
| 6             | 589.4       | 2.104       | 0.0073                  | 21            | 499.8       | 2.481       | 0.1579                  |
| 7             | 570.6       | 2.173       | 0.002                   | 22            | 496.8       | 2.496       | 0.003                   |
| 8             | 568.7       | 2.180       | 0                       | 23            | 471.7       | 2.628       | 0.001                   |
| 9             | 563.6       | 2.200       | 0.0003                  | 24            | 469.9       | 2.639       | 0.1084                  |
| 10            | 562.6       | 2.204       | 0.05                    | 25            | 466.9       | 2.656       | 0.0212                  |
| 11            | 559.3       | 2.217       | 0.1468                  | 26            | 466.4       | 2.658       | 0.1122                  |
| 12            | 557.3       | 2.225       | 0.0122                  | 27            | 464.7       | 2.668       | 0.0757                  |
| 13            | 553.5       | 2.240       | 0.001                   | 28            | 462.3       | 2.682       | 0.0575                  |
| 14            | 549.2       | 2.258       | 0.0398                  | 29            | 459.3       | 2.700       | 0.0124                  |
| 15            | 547.1       | 2.266       | 0.8471                  | 30            | 453.9       | 2.732       | 1.0419                  |

**Table S11.** Orbital transitions and their relative contributions to optically active excitations with large oscillator strengths from the TD-DFT calculations of **p-HBC**. Only transitions with contributions exceeding 10% are listed.

| State | Energy (eV) | Transition       | Contribution (%) |
|-------|-------------|------------------|------------------|
| 1     | 1.710       | HOMO-1 → LUMO+1  | 19.9             |
|       |             | HOMO → LUMO      | 73.1             |
| 4     | 1.934       | HOMO-1 → LUMO+1  | 58.9             |
|       |             | HOMO → LUMO      | 15.4             |
| 5     | 2.063       | HOMO-2 → LUMO    | 16.8             |
|       |             | HOMO-1 → LUMO+1  | 15.6             |
|       |             | HOMO-1 → LUMO+3  | 12.1             |
|       |             | HOMO → LUMO+2    | 30.1             |
| 11    | 2.217       | HOMO-25 → LUMO+8 | 10.8             |
|       |             | HOMO-3 → LUMO+1  | 14.8             |
|       |             | HOMO-2 → LUMO    | 28.3             |
|       |             | HOMO-1 → LUMO+3  | 11.5             |
| 15    | 2.266       | HOMO-2 → LUMO    | 22.7             |
|       |             | HOMO → LUMO+2    | 45.3             |

**tri-HBC-fused porphyrin-HBC t-HBC**

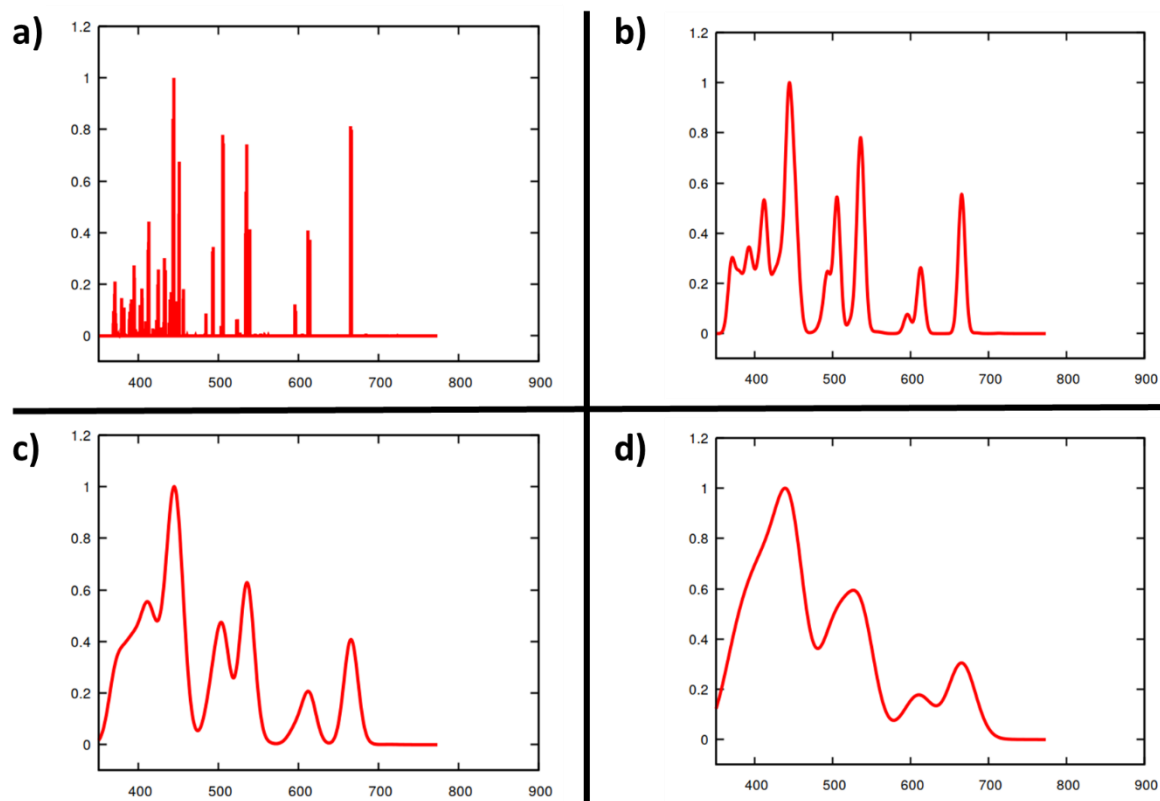

**Figure S82.** DFT-calculated transitions for **tri-HBC** with increasing broadening factor  $\sigma$ : a) no broadening, b) 5 nm, c) 10 nm, d) 20 nm.

**Table S12.** TD-DFT excitation energies and oscillator strengths of *tri-HBC*.

| Excited state | Energy (nm) | Energy (eV) | Oscillator strength <i>f</i> | Excited state | Energy (nm) | Energy (eV) | Oscillator strength <i>f</i> |
|---------------|-------------|-------------|------------------------------|---------------|-------------|-------------|------------------------------|
| 1             | 723.5       | 1.714       | 0.0002                       | 16            | 558.4       | 2.221       | 0.0038                       |
| 2             | 714.3       | 1.736       | 0.001                        | 17            | 557.6       | 2.224       | 0.0004                       |
| 3             | 713.0       | 1.739       | 0.0021                       | 18            | 556.9       | 2.226       | 0.0003                       |
| 4             | 684.1       | 1.812       | 0.0065                       | 19            | 556.1       | 2.230       | 0.0017                       |
| 5             | 666.1       | 1.861       | 0.6071                       | 20            | 555.6       | 2.231       | 0.0017                       |
| 6             | 664.8       | 1.865       | 0.6176                       | 21            | 552.7       | 2.243       | 0.0067                       |
| 7             | 614.0       | 2.019       | 0.2831                       | 22            | 552.3       | 2.245       | 0.001                        |
| 8             | 611.6       | 2.027       | 0.3104                       | 23            | 549.1       | 2.258       | 0.001                        |
| 9             | 604.7       | 2.050       | 0.0064                       | 24            | 545.6       | 2.272       | 0.0062                       |
| 10            | 596.2       | 2.080       | 0.0733                       | 25            | 539.0       | 2.300       | 0.3135                       |
| 11            | 595.3       | 2.083       | 0.0925                       | 26            | 538.3       | 2.303       | 0.279                        |
| 12            | 589.2       | 2.104       | 0.0038                       | 27            | 535.1       | 2.317       | 0.5641                       |
| 13            | 564.8       | 2.195       | 0.0022                       | 28            | 534.2       | 2.321       | 0.4249                       |
| 14            | 562.1       | 2.206       | 0.0005                       | 29            | 533.7       | 2.323       | 0.3023                       |
| 15            | 561.7       | 2.207       | 0.0042                       | 30            | 526.7       | 2.354       | 0.0095                       |

**Table S13.** Orbital transitions and their relative contributions to optically active excitations with large oscillator strengths from the TD-DFT calculations of *tri-HBC*. Only transitions with contributions exceeding 10% are listed.

| State | Energy (eV) | Transition      | Contribution (%) |
|-------|-------------|-----------------|------------------|
| 1     | 1.714       | HOMO-1 → LUMO   | 21.3             |
|       |             | HOMO-1 → LUMO+1 | 21.2             |
|       |             | HOMO → LUMO     | 26.2             |
|       |             | HOMO → LUMO+1   | 14.6             |
| 5     | 1.861       | HOMO-1 → LUMO   | 23.5             |
|       |             | HOMO-1 → LUMO+2 | 19.5             |
|       |             | HOMO → LUMO+1   | 27.1             |
|       |             | HOMO → LUMO+2   | 14.4             |
| 6     | 1.865       | HOMO-1 → LUMO+1 | 16.9             |
|       |             | HOMO-1 → LUMO+2 | 28.1             |
|       |             | HOMO → LUMO     | 13.6             |
|       |             | HOMO → LUMO+2   | 25.3             |
| 7     | 2.019       | HOMO-2 → LUMO   | 64.4             |
| 8     | 2.027       | HOMO-2 → LUMO+1 | 63.2             |



# Cartesian Coordinates of Calculated Structures

## *para*-porphyrin-HBC 12

Cartesian  
Coordinates  
(Angstroms)

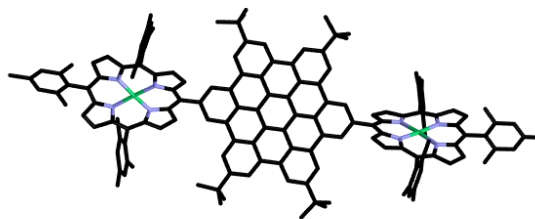

|    | X        | Y        | Z        |   | X        | Y        | Z        |    | X        | Y        | Z        |
|----|----------|----------|----------|---|----------|----------|----------|----|----------|----------|----------|
| C  | 32.95467 | 27.24522 | 22.41722 | C | 30.80443 | 26.05930 | 22.39220 | C  | 19.56127 | 26.83330 | 20.85063 |
| C  | 32.25980 | 28.45102 | 22.47657 | C | 28.66753 | 27.33294 | 22.43066 | H  | 19.92411 | 25.79917 | 20.76758 |
| C  | 32.20457 | 26.06640 | 22.38011 | C | 27.98240 | 28.57920 | 22.47398 | H  | 18.46256 | 26.81282 | 20.78552 |
| C  | 30.19061 | 32.22854 | 22.70315 | C | 25.82257 | 27.39661 | 22.38160 | C  | 19.44648 | 26.67103 | 23.36055 |
| C  | 30.85664 | 28.51040 | 22.49135 | C | 26.50776 | 26.14964 | 22.34715 | H  | 19.80933 | 25.63360 | 23.34788 |
| C  | 28.72862 | 29.80818 | 22.54527 | C | 27.92994 | 26.11781 | 22.37249 | H  | 19.74342 | 27.12002 | 24.31960 |
| C  | 30.15499 | 29.78851 | 22.56015 | C | 28.62402 | 24.85591 | 22.34095 | H  | 18.34691 | 26.64327 | 23.31783 |
| C  | 30.85380 | 31.00273 | 22.63897 | C | 25.76076 | 24.91858 | 22.29046 | H  | 19.94819 | 27.39670 | 19.98895 |
| C  | 28.79560 | 32.23905 | 22.68970 | C | 24.38278 | 27.43256 | 22.34369 | C  | 30.69535 | 20.99545 | 22.27430 |
| C  | 28.04686 | 31.05905 | 22.60563 | C | 27.89641 | 23.63075 | 22.29633 | C  | 30.29148 | 20.23382 | 20.99451 |
| H  | 31.94195 | 31.01481 | 22.64515 | C | 28.59908 | 22.42045 | 22.26998 | H  | 30.59664 | 20.78972 | 20.09586 |
| H  | 28.29912 | 33.20483 | 22.75411 | C | 29.99493 | 22.35960 | 22.29337 | C  | 32.22518 | 21.12401 | 22.29757 |
| C  | 26.55948 | 28.61094 | 22.45066 | C | 30.69278 | 23.56463 | 22.33631 | H  | 32.57795 | 21.63215 | 23.20750 |
| C  | 25.86468 | 29.87140 | 22.49641 | C | 30.04584 | 24.81119 | 22.35554 | H  | 32.67775 | 20.12181 | 22.28004 |
| C  | 23.68507 | 28.67162 | 22.37596 | C | 24.33605 | 24.94463 | 22.25370 | H  | 30.53644 | 20.70758 | 24.43935 |
| C  | 26.58900 | 31.09167 | 22.57674 | C | 23.63383 | 23.73470 | 22.20949 | H  | 32.60225 | 21.67524 | 21.42316 |
| C  | 25.88885 | 32.30817 | 22.61861 | C | 24.28613 | 22.50138 | 22.21315 | H  | 28.04290 | 21.48558 | 22.23098 |
| C  | 24.49800 | 32.36944 | 22.58951 | C | 25.68096 | 22.48080 | 22.24162 | H  | 29.20512 | 20.07606 | 20.94020 |
| C  | 23.79874 | 31.16177 | 22.51339 | C | 26.43604 | 23.66252 | 22.27380 | H  | 30.77701 | 19.24616 | 20.97126 |
| C  | 24.44017 | 29.91807 | 22.46261 | C | 22.28161 | 28.67087 | 22.32554 | C  | 30.25895 | 20.18452 | 23.51248 |
| H  | 26.44911 | 33.23680 | 22.67404 | C | 21.53640 | 27.49662 | 22.24269 | H  | 29.17211 | 20.02239 | 23.52982 |
| H  | 22.71099 | 31.19741 | 22.49279 | C | 22.23583 | 26.28751 | 22.21841 | H  | 30.74797 | 19.19827 | 23.51263 |
| C  | 23.72822 | 33.69493 | 22.63829 | C | 23.63303 | 26.22390 | 22.26873 | C  | 34.48672 | 27.17306 | 22.39655 |
| C  | 22.81806 | 33.70732 | 23.88426 | H | 21.75405 | 29.62027 | 22.34163 | C  | 34.97249 | 26.39542 | 23.63758 |
| H  | 23.41406 | 33.61599 | 24.80408 | H | 21.66488 | 25.36306 | 22.15636 | H  | 34.66446 | 26.90472 | 24.56244 |
| C  | 22.25211 | 34.65034 | 23.93188 | H | 22.54672 | 23.72776 | 22.16976 | H  | 34.56382 | 25.37533 | 23.66283 |
| H  | 24.66322 | 34.91101 | 22.71190 | H | 26.17233 | 21.50973 | 22.25015 | H  | 36.07078 | 26.32062 | 23.63371 |
| H  | 25.32304 | 34.97426 | 21.83371 | H | 31.77851 | 23.53498 | 22.35846 | C  | 34.94665 | 26.43866 | 21.11984 |
| H  | 24.06433 | 35.83284 | 22.74511 | H | 32.73814 | 25.11869 | 22.33478 | H  | 34.60978 | 26.97198 | 20.21896 |
| C  | 22.86122 | 33.82591 | 21.36890 | H | 22.09482 | 32.87972 | 23.86746 | H  | 36.04536 | 26.37667 | 21.09353 |
| H  | 23.48854 | 33.82634 | 20.46555 | C | 20.00451 | 27.48737 | 22.17604 | C  | 35.13849 | 28.56343 | 22.41204 |
| H  | 22.14321 | 32.99855 | 21.27962 | C | 19.41027 | 28.90153 | 22.24002 | H  | 34.84361 | 29.16258 | 21.53780 |
| H  | 22.29085 | 34.76703 | 21.39381 | H | 19.67826 | 29.41453 | 23.17581 | H  | 34.88094 | 29.12692 | 23.32118 |
| H  | 25.29051 | 34.89004 | 23.61534 | H | 19.74458 | 29.52234 | 21.39538 | H  | 36.23277 | 28.45561 | 22.38740 |
| C  | 30.10704 | 27.30209 | 22.43986 | H | 18.31307 | 28.84222 | 22.19465 | H  | 34.55071 | 25.41440 | 21.07309 |
| H  | 37.37949 | 44.86903 | 22.10714 | C | 28.55003 | 39.17257 | 16.96876 | C  | 18.29226 | 13.68826 | 21.51368 |
| H  | 37.61406 | 44.78995 | 23.86409 | C | 27.98511 | 39.10350 | 18.24704 | H  | 17.68575 | 12.43162 | 21.62993 |
| H  | 38.77061 | 43.99364 | 22.76763 | C | 28.70446 | 38.62464 | 19.34741 | C  | 19.21951 | 11.80903 | 23.36757 |
| C  | 33.85915 | 41.57528 | 24.86278 | C | 27.74509 | 39.66201 | 15.79383 | C  | 19.85179 | 13.05408 | 23.28649 |
| H  | 33.99109 | 40.73029 | 25.55610 | H | 28.39481 | 40.02852 | 14.98717 | H  | 22.84992 | 14.65624 | 18.66964 |
| H  | 33.75952 | 42.49427 | 25.45495 | H | 27.12516 | 38.85241 | 15.37522 | H  | 21.11791 | 13.47665 | 20.41894 |
| H  | 32.90997 | 41.39995 | 24.33361 | H | 27.06422 | 40.47482 | 16.08426 | H  | 17.61373 | 17.74651 | 25.33058 |
| C  | 36.71965 | 39.58295 | 21.18909 | C | 32.05062 | 37.81578 | 17.67129 | H  | 17.84310 | 15.36870 | 24.01437 |
| H  | 36.92473 | 38.65393 | 21.74269 | H | 32.19757 | 36.78305 | 18.02204 | C  | 17.78605 | 14.68868 | 20.50841 |
| H  | 35.87571 | 39.36498 | 20.51656 | H | 32.32310 | 37.86260 | 16.60890 | H  | 18.56544 | 14.94718 | 19.77493 |
| H  | 37.59793 | 39.81996 | 20.57463 | H | 32.75814 | 38.44198 | 18.23654 | H  | 16.91844 | 14.29419 | 19.96361 |
| Ni | 32.60581 | 36.50186 | 22.99689 | C | 28.06177 | 38.56074 | 20.70788 | H  | 17.49018 | 15.63061 | 20.99503 |
| H  | 38.00511 | 41.95858 | 21.42869 | H | 27.98411 | 37.52134 | 21.06359 | C  | 21.01973 | 13.37796 | 24.18005 |
| H  | 35.57316 | 43.65166 | 24.54353 | H | 28.65594 | 39.10419 | 21.45792 | H  | 21.91494 | 13.63179 | 23.59203 |
| C  | 29.96612 | 34.23290 | 20.60557 | H | 27.05217 | 38.99160 | 20.68621 | H  | 20.80560 | 14.25157 | 24.81490 |
| H  | 29.49896 | 33.28814 | 20.34908 | H | 30.33472 | 38.79742 | 15.81879 | H  | 21.26409 | 12.52935 | 24.83223 |
| C  | 29.90833 | 35.41694 | 19.93565 | H | 26.95320 | 39.43432 | 18.39521 | Ni | 21.63668 | 18.36465 | 22.10188 |
| H  | 33.02652 | 33.07763 | 26.87600 | C | 20.87258 | 20.21235 | 24.34018 | H  | 24.74652 | 19.48920 | 18.10371 |
| C  | 34.84711 | 34.98495 | 27.10489 | C | 22.59359 | 20.98588 | 23.21212 | C  | 23.90377 | 16.97993 | 17.96491 |
| C  | 34.45634 | 35.53809 | 28.34027 | N | 21.67784 | 19.94148 | 23.24162 | C  | 23.18900 | 17.03838 | 16.75275 |
| C  | 35.09309 | 35.10343 | 29.50903 | N | 22.98601 | 19.16246 | 20.94637 | C  | 23.82804 | 16.64536 | 15.57025 |
| C  | 36.10568 | 34.13951 | 29.48374 | C | 23.60415 | 20.39767 | 21.08285 | C  | 25.15135 | 16.19502 | 15.56077 |
| C  | 36.48133 | 33.61085 | 28.24373 | C | 24.39596 | 20.70247 | 19.91907 | C  | 25.83779 | 16.13847 | 16.77932 |
| C  | 35.86886 | 34.01413 | 27.05245 | C | 24.28914 | 19.63719 | 19.07732 | C  | 25.23876 | 16.52448 | 17.98251 |
| C  | 36.75874 | 33.66384 | 30.75467 | C | 23.44434 | 18.67366 | 19.72850 | C  | 25.83027 | 15.79751 | 14.27674 |
| H  | 36.63855 | 34.39458 | 31.56624 | C | 19.75404 | 19.48846 | 24.73353 | H  | 25.10242 | 15.64370 | 13.46853 |
| H  | 36.31317 | 32.71519 | 31.09578 | C | 23.49266 | 21.24527 | 22.18126 | H  | 26.53578 | 16.57653 | 13.94552 |
| H  | 37.83356 | 33.48312 | 30.60976 | C | 23.24052 | 17.39092 | 19.23771 | H  | 26.40828 | 14.86995 | 14.40036 |
| C  | 33.37144 | 36.58036 | 28.40682 | H | 24.95019 | 21.62420 | 19.77573 | C  | 21.76041 | 17.51410 | 16.72545 |
| H  | 32.44550 | 36.22497 | 27.92987 | C | 19.42983 | 18.27758 | 24.13666 | C  | 19.62493 | 18.51953 | 17.16278 |
| H  | 33.14488 | 36.84640 | 29.44755 | C | 18.34312 | 17.44721 | 24.58377 | H  | 21.10872 | 16.85250 | 17.31697 |
| H  | 33.66623 | 37.49756 | 27.87361 | C | 36.30111 | 33.42296 | 25.73647 | H  | 35.49008 | 32.83619 | 25.27717 |

|   |          |          |          |
|---|----------|----------|----------|
| H | 37.16864 | 32.76323 | 25.86864 |
| H | 34.78779 | 35.53354 | 30.46693 |
| H | 37.27833 | 32.86320 | 28.19951 |
| C | 18.45972 | 16.25852 | 23.92877 |
| C | 19.59785 | 16.37238 | 23.05597 |
| N | 20.17703 | 17.62947 | 23.16073 |
| N | 21.70580 | 16.72250 | 21.05836 |
| C | 21.06164 | 15.52086 | 21.32505 |
| C | 21.47781 | 14.50101 | 20.39926 |
| C | 22.33941 | 15.09062 | 19.52405 |
| C | 26.00739 | 16.44616 | 19.27516 |
| H | 26.16431 | 17.44693 | 19.70729 |
| H | 25.46100 | 15.86116 | 20.03026 |
| H | 26.99003 | 15.98165 | 19.12020 |
| H | 26.87097 | 15.77993 | 16.79585 |
| C | 18.92589 | 19.99628 | 25.86752 |
| C | 19.14986 | 19.51351 | 27.17260 |
| C | 29.87356 | 38.75031 | 16.80937 |
| C | 22.47059 | 16.46470 | 19.92932 |
| C | 20.04526 | 15.33212 | 22.25181 |
| C | 19.38184 | 13.99837 | 22.35126 |
| C | 18.36700 | 20.01022 | 28.22174 |
| C | 17.16829 | 21.43255 | 26.70620 |
| C | 17.92949 | 20.96523 | 25.62978 |

# meta-porphyrin-HBC 13

## Cartesian Coordinates (Angstroms)

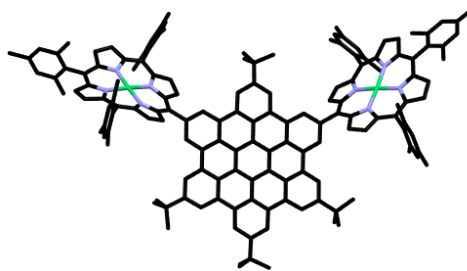

|    | X        | Y        | Z        |   | X        | Y        | Z        |    | X        | Y        | Z        |   |          |          |          |
|----|----------|----------|----------|---|----------|----------|----------|----|----------|----------|----------|---|----------|----------|----------|
| C  | 28.08794 | 24.83088 | 23.11294 | C | 23.84275 | 24.63981 | 22.55373 | H  | 13.58717 | 23.34157 | 21.24860 | N | 26.03185 | 33.20057 | 21.78496 |
| C  | 27.32517 | 25.99073 | 22.99534 | C | 23.07920 | 25.83898 | 22.50514 | C  | 14.80474 | 23.45901 | 23.71997 | N | 27.41242 | 32.27574 | 23.97011 |
| C  | 27.42740 | 23.60548 | 22.98524 | C | 21.00622 | 24.51459 | 22.37334 | H  | 15.23195 | 22.44662 | 23.74088 | C | 26.56184 | 31.19003 | 23.83036 |
| C  | 25.04315 | 29.63067 | 22.65175 | C | 21.77037 | 23.31564 | 22.40600 | H  | 15.16175 | 23.99353 | 24.61235 | C | 26.64447 | 30.33163 | 24.98471 |
| C  | 25.93768 | 25.95899 | 22.77872 | C | 23.18850 | 23.37803 | 22.49690 | H  | 13.70997 | 23.36577 | 23.78801 | C | 27.57851 | 30.87245 | 25.81624 |
| C  | 23.74128 | 27.11568 | 22.55108 | C | 23.96259 | 22.16375 | 22.52702 | H  | 14.94456 | 23.96492 | 20.27410 | C | 28.08486 | 32.04971 | 25.16567 |
| C  | 25.16019 | 27.18823 | 22.67139 | C | 21.10800 | 22.03938 | 22.32812 | C  | 19.14674 | 18.14891 | 21.87535 | C | 25.48828 | 35.21815 | 20.45857 |
| C  | 25.77929 | 28.44425 | 22.68914 | C | 19.56890 | 24.45159 | 22.31742 | C  | 19.47637 | 17.26123 | 23.09346 | C | 25.73965 | 30.93805 | 22.73168 |
| C  | 23.65149 | 29.55156 | 22.56704 | C | 23.31922 | 20.89507 | 22.43089 | H  | 19.08996 | 17.71009 | 24.02022 | C | 29.20131 | 32.74697 | 25.61063 |
| C  | 22.98440 | 28.32208 | 22.48331 | C | 24.09965 | 19.73127 | 22.45757 | C  | 17.61982 | 18.24794 | 21.74837 | H | 26.04671 | 29.43846 | 25.13267 |
| H  | 26.86359 | 28.52390 | 22.73509 | C | 25.49183 | 19.77987 | 22.54922 | H  | 17.32053 | 18.85188 | 20.87872 | C | 26.49271 | 35.99764 | 21.01835 |
| H  | 23.08853 | 30.48236 | 22.58374 | C | 26.11507 | 21.02630 | 22.62632 | H  | 17.19601 | 17.24174 | 21.61660 | C | 26.75394 | 37.35555 | 20.61983 |
| C  | 21.66073 | 25.77609 | 22.41589 | C | 25.38233 | 22.21903 | 22.64180 | H  | 19.48275 | 18.10246 | 19.71127 | C | 27.94791 | 37.70738 | 21.71498 |
| C  | 20.88893 | 26.98856 | 22.34481 | C | 19.68999 | 21.96389 | 22.24759 | H  | 17.16357 | 18.68530 | 22.64906 | C | 28.39863 | 36.58016 | 21.94804 |
| C  | 18.79276 | 25.64332 | 22.29935 | C | 19.07715 | 20.70841 | 22.10391 | H  | 23.63108 | 18.75023 | 22.40808 | N | 27.48379 | 35.53987 | 21.87779 |
| C  | 21.53396 | 28.25560 | 22.34155 | C | 19.80621 | 19.52167 | 22.05620 | H  | 20.55993 | 17.12113 | 23.21261 | N | 29.09130 | 34.45069 | 23.82343 |
| C  | 20.76458 | 29.41915 | 22.18130 | C | 21.19598 | 19.61010 | 22.17369 | H  | 19.01862 | 16.26721 | 22.97385 | C | 29.91572 | 35.52557 | 23.51565 |
| C  | 19.37845 | 29.38282 | 22.04680 | C | 21.86474 | 20.83192 | 22.31183 | C  | 19.69863 | 17.48549 | 20.59581 | C | 31.08241 | 35.52783 | 24.35836 |
| H  | 18.75384 | 28.13302 | 22.10044 | H | 17.39189 | 25.55046 | 22.33297 | H  | 20.78707 | 17.34183 | 20.64913 | C | 30.94272 | 34.48908 | 25.23001 |
| C  | 19.46739 | 26.93785 | 22.25285 | C | 16.72550 | 24.32681 | 22.36289 | H  | 19.23503 | 16.49774 | 20.44990 | C | 29.70605 | 33.83121 | 24.92026 |
| H  | 21.26811 | 30.38103 | 22.14131 | C | 17.50192 | 23.16479 | 22.33157 | C  | 29.59590 | 24.85498 | 23.38946 | C | 29.60250 | 36.56079 | 22.64327 |
| H  | 17.67085 | 28.09151 | 21.99561 | C | 18.90135 | 23.19238 | 22.29758 | C  | 29.87380 | 24.13380 | 24.72554 | C | 30.54103 | 37.71230 | 22.49393 |
| C  | 18.53749 | 30.64691 | 21.83179 | H | 16.80542 | 26.46501 | 22.35492 | H  | 29.35613 | 24.63646 | 25.55573 | C | 30.48592 | 38.79137 | 23.40084 |
| C  | 17.52235 | 30.78736 | 22.98481 | H | 16.99322 | 22.20239 | 22.35223 | H  | 29.53612 | 23.08798 | 24.70198 | C | 31.36342 | 39.86658 | 23.22721 |
| H  | 18.03967 | 30.88410 | 23.95057 | H | 17.99578 | 20.66007 | 22.00917 | H  | 30.95352 | 24.13545 | 24.94001 | C | 32.29203 | 39.90084 | 22.18038 |
| H  | 16.89987 | 31.68293 | 22.83566 | H | 21.77581 | 18.68940 | 22.14310 | C  | 30.33662 | 24.12406 | 22.25024 | C | 32.33166 | 38.81660 | 21.29898 |
| C  | 19.39650 | 31.91904 | 21.78610 | H | 27.20238 | 21.04824 | 22.65728 | H  | 30.16546 | 24.62528 | 21.28623 | C | 31.46964 | 37.72154 | 21.43481 |
| H  | 20.12825 | 31.88935 | 20.96513 | H | 28.01092 | 22.69130 | 23.08027 | H  | 31.41965 | 24.11414 | 22.44705 | H | 31.60363 | 34.17934 | 26.03423 |
| H  | 18.74903 | 32.79285 | 21.62306 | H | 16.85342 | 29.91727 | 23.04604 | C  | 30.14798 | 26.28459 | 23.48765 | H | 31.87898 | 36.26334 | 24.29517 |
| C  | 17.78066 | 30.52684 | 20.49242 | C | 15.19726 | 24.21672 | 22.43440 | C  | 29.99593 | 26.84616 | 22.55397 | H | 26.10905 | 37.93395 | 19.96481 |
| H  | 18.48565 | 30.42239 | 19.65467 | C | 14.51187 | 25.59048 | 22.45674 | H  | 29.68207 | 26.84794 | 24.30991 | H | 28.49395 | 38.64169 | 21.08340 |
| H  | 17.11157 | 29.65498 | 20.47987 | H | 14.81435 | 26.18401 | 23.33228 | H  | 31.22982 | 26.24810 | 23.68172 | C | 33.20200 | 41.08666 | 21.99686 |
| H  | 17.16893 | 31.42557 | 20.31956 | H | 14.73356 | 26.17179 | 21.54934 | H  | 30.00379 | 23.08125 | 22.15173 | H | 32.65619 | 41.93753 | 21.55802 |
| H  | 19.94027 | 32.07984 | 22.72877 | H | 13.42151 | 25.45555 | 22.50676 | H  | 27.82002 | 26.95273 | 23.09578 | H | 33.61492 | 41.42866 | 22.95705 |
| C  | 25.27453 | 24.70494 | 22.68871 | C | 14.68269 | 23.44021 | 21.20454 | C  | 25.36203 | 33.86905 | 20.77033 | H | 34.03956 | 40.85050 | 21.32652 |
| C  | 26.04800 | 23.51191 | 22.76720 | H | 15.11042 | 22.42906 | 21.15317 | C  | 25.52685 | 31.90627 | 21.75240 | C | 29.49479 | 38.79224 | 24.53444 |
| H  | 29.55557 | 39.72539 | 25.10956 | H | 21.49375 | 36.66017 | 15.82679 | H  | 31.69388 | 14.61814 | 26.06005 | H | 29.67408 | 37.95131 | 25.22210 |
| H  | 28.46454 | 38.67918 | 24.16385 | H | 21.05349 | 37.98507 | 16.92374 | H  | 31.13035 | 12.19476 | 24.94250 | H | 33.53257 | 18.99032 | 26.84854 |
| C  | 31.53644 | 36.57379 | 20.46213 | C | 26.35134 | 35.41691 | 17.66892 | H  | 26.90205 | 11.99371 | 18.95498 | H | 31.02189 | 16.99270 | 29.70943 |
| H  | 31.71223 | 35.61913 | 20.98090 | H | 26.51604 | 34.37456 | 17.98110 | H  | 28.08244 | 10.62300 | 20.99690 | C | 26.25904 | 14.44241 | 18.10886 |
| H  | 30.58879 | 36.46092 | 19.91273 | H | 26.46896 | 35.47554 | 16.57902 | C  | 30.72911 | 6.86938  | 23.97236 | C | 24.91863 | 14.07531 | 17.87614 |
| H  | 32.34194 | 36.72407 | 19.73138 | H | 27.15178 | 36.01295 | 18.13422 | H  | 30.11384 | 6.17443  | 23.37811 | C | 24.51564 | 13.77874 | 16.56818 |
| Ni | 27.50551 | 33.86644 | 22.86308 | C | 22.83710 | 36.15017 | 21.24782 | H  | 31.77856 | 6.69719  | 23.69661 | C | 25.40311 | 13.83910 | 15.48957 |
| H  | 33.05380 | 38.82085 | 20.47776 | H | 22.76508 | 35.09828 | 21.56625 | H  | 30.60800 | 6.59298  | 25.02872 | C | 26.73080 | 14.19866 | 15.74758 |
| H  | 31.31679 | 40.70371 | 23.92964 | H | 23.54757 | 36.63594 | 21.93350 | C  | 31.40376 | 11.24646 | 21.54814 | C | 27.17597 | 14.50007 | 17.03877 |
| C  | 24.61913 | 31.74894 | 20.64477 | H | 21.85191 | 36.61641 | 21.38073 | H  | 31.79060 | 12.16509 | 22.01533 | C | 24.94213 | 13.54776 | 14.08584 |
| H  | 24.13515 | 30.81810 | 20.36952 | H | 24.43591 | 36.51946 | 16.10603 | H  | 32.25231 | 10.68234 | 21.13970 | H | 23.99397 | 12.99297 | 14.08172 |
| C  | 24.49144 | 32.97323 | 20.06014 | H | 21.45749 | 37.15125 | 19.14095 | H  | 30.76679 | 11.56682 | 20.70924 | H | 24.78223 | 14.48124 | 13.52238 |
| H  | 27.92360 | 30.50967 | 26.77973 | C | 26.51395 | 16.04177 | 20.00034 | C  | 27.64602 | 10.75265 | 24.91047 | H | 25.68782 | 12.95951 | 13.53154 |
| C  | 29.90706 | 32.27902 | 26.84021 | C | 26.23088 | 17.70642 | 21.41382 | H  | 27.94991 | 11.61350 | 25.52602 | C | 23.93312 | 13.99062 | 19.01176 |
| C  | 29.65822 | 32.91513 | 28.07460 | N | 26.83029 | 16.46333 | 21.28656 | H  | 26.87189 | 11.12122 | 24.22042 | H | 23.78587 | 14.97251 | 19.48773 |
| C  | 30.31518 | 32.45368 | 29.21939 | N | 28.03088 | 17.17116 | 23.65061 | H  | 27.19269 | 10.00131 | 25.57023 | H | 22.95777 | 13.63060 | 18.65907 |
| C  | 31.21513 | 31.38239 | 29.17364 | C | 27.16210 | 18.25378 | 23.59176 | Ni | 27.99680 | 15.56972 | 22.55139 | H | 24.28973 | 13.31054 | 19.80024 |
| C  | 31.45263 | 30.77490 | 27.93763 | C | 27.39159 | 19.14145 | 24.70375 | H  | 28.68213 | 8.25734  | 25.12496 | C | 28.61332 | 14.87895 | 17.28065 |
| C  | 30.81238 | 31.20165 | 26.76714 | C | 28.46219 | 18.65021 | 25.38911 | H  | 31.87276 | 8.67807  | 22.27476 | H | 28.69124 | 15.86089 | 17.77166 |
| C  | 31.89246 | 30.89232 | 30.42626 | C | 28.84992 | 17.42766 | 24.74053 | C  | 25.57735 | 18.07967 | 20.18503 | H | 29.10970 | 14.15655 | 17.94702 |
| H  | 32.33040 | 31.72431 | 30.99760 | C | 26.72311 | 14.76548 | 19.49085 | H  | 25.05831 | 19.01883 | 20.02400 | H | 29.17378 | 14.91794 | 16.33742 |
| H  | 31.17448 | 30.38685 | 31.09167 | C | 26.29291 | 18.53011 | 22.53779 | C  | 25.77494 | 17.05937 | 19.30360 | H | 23.47625 | 13.48911 | 16.39018 |
| H  | 32.69301 | 30.17675 | 30.19525 | C | 29.87946 | 16.61362 | 25.20153 | H  | 28.94406 | 19.05161 | 26.27552 | H | 27.44414 | 14.24496 | 14.91973 |
| C  | 28.69604 | 34.07030 | 28.16220 | H | 26.81029 | 20.03237 | 24.91575 | C  | 30.74499 | 17.10483 | 26.31497 | H | 23.87966 | 33.26152 | 19.21070 |
| H  | 27.71765 | 33.80890 | 27.73195 | C | 27.28503 | 13.76100 | 20.27171 | C  | 31.86181 | 17.91284 | 26.02397 | H | 25.43659 | 16.97439 | 18.27535 |
| H  | 28.54571 | 34.37855 | 29.20511 | C | 27.30369 | 12.37388 | 19.88966 | C  | 32.66170 | 18.36991 | 27.07814 | C | 21.90223 | 37.46229 | 16.46238 |
| H  | 29.06417 | 34.94043 | 27.59655 | C | 27.88809 | 11.68820 | 20.91305 | C  | 32.37864 | 18.05346 | 28.41030 | H | 22.41977 | 38.16873 | 15.79690 |
| C  | 31.09507 | 30.51543 | 25.45643 | C | 28.27727 | 12.66162 | 21.89948 | C  | 31.26209 | 17.25246 | 28.67450 | C | 29.22976 | 8.85930  | 24.39418 |
| H  | 30.20969 | 29.97090 | 25.09164 | N | 27.86751 | 13.93265 | 21.51830 | C  | 30.43760 | 16.77260 | 27.65117 | C | 28.81876 | 10.17616 | 24.16196 |
| H  | 31.36144 | 31.24063 | 24.67314 | N | 29.26010 | 14.71317 | 23.74904 | C  | 33.23171 | 18.58248 | 29.53287 | H | 29.32970 | 14.91478 | 27.55094 |
| H  | 31.91844 | 29.79648 | 25.56001 | C | 29.62791 | 13.37663 | 23.77954 | H  | 34.23562 | 18.85571 | 29.17996 | H |          |          |          |

# ortho-porphyrin-HBC 11

Cartesian  
Coordinates  
(Angstroms)

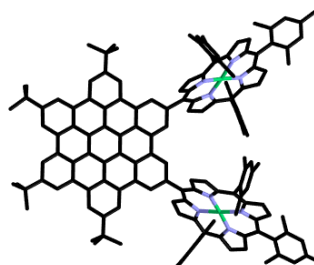

|   | X        | Y        | Z        |   | X        | Y        | Z        |    | X        | Y        | Z        |    |          |          |          |
|---|----------|----------|----------|---|----------|----------|----------|----|----------|----------|----------|----|----------|----------|----------|
| C | 25.14023 | 19.16175 | 22.53186 | C | 23.04994 | 17.90020 | 22.42610 | C  | 11.82845 | 18.22807 | 20.73929 | H  | 24.96851 | 21.28313 | 22.60565 |
| C | 24.41073 | 20.34970 | 22.57058 | C | 20.86932 | 19.09899 | 22.45204 | H  | 12.22692 | 17.20439 | 20.70393 | C  | 25.21410 | 26.71992 | 20.37429 |
| C | 24.45064 | 17.95122 | 22.46081 | C | 20.14014 | 20.32094 | 22.48913 | H  | 10.73299 | 18.16731 | 20.64932 | C  | 23.74634 | 25.70950 | 21.65812 |
| C | 22.21929 | 24.04763 | 22.68561 | C | 18.02507 | 19.06156 | 22.38513 | C  | 11.65256 | 18.16047 | 23.25045 | N  | 24.55637 | 26.83529 | 21.59355 |
| C | 23.01060 | 20.35621 | 22.55087 | C | 18.75386 | 17.84026 | 22.35516 | H  | 12.04437 | 17.13406 | 23.28314 | N  | 23.29756 | 27.45941 | 23.96716 |
| C | 20.83964 | 21.57763 | 22.56009 | C | 20.17581 | 17.85888 | 22.38608 | H  | 11.91712 | 18.65269 | 24.19776 | C  | 22.77576 | 26.17880 | 23.83368 |
| C | 22.26402 | 21.60819 | 22.59010 | C | 20.91292 | 16.62238 | 22.33433 | H  | 10.55524 | 18.10163 | 23.18624 | C  | 21.94685 | 25.84457 | 24.96262 |
| C | 22.92249 | 22.84348 | 22.65789 | C | 18.05188 | 16.58403 | 22.30398 | H  | 12.21714 | 18.77139 | 19.86561 | C  | 21.90699 | 26.94528 | 25.76275 |
| C | 20.82512 | 24.01292 | 22.65503 | C | 16.58603 | 19.04314 | 22.33509 | C  | 15.94962 | 12.74160 | 22.29752 | C  | 22.73123 | 27.94403 | 25.13935 |
| C | 20.11572 | 22.80521 | 22.60120 | C | 20.23189 | 15.37577 | 22.26598 | C  | 16.34022 | 11.97523 | 23.57847 | C  | 26.24397 | 27.53276 | 19.92203 |
| H | 24.00906 | 22.89226 | 22.69357 | C | 20.97859 | 14.19016 | 22.16845 | H  | 16.03260 | 12.53216 | 24.47564 | C  | 22.94357 | 25.34474 | 22.73390 |
| H | 20.29674 | 24.96410 | 22.66172 | C | 22.37170 | 14.18273 | 22.14855 | C  | 14.42116 | 12.88353 | 22.26534 | C  | 22.88320 | 29.22409 | 25.65442 |
| C | 18.71781 | 20.30189 | 22.45245 | C | 23.02652 | 15.41370 | 22.24088 | H  | 14.08042 | 13.40746 | 21.35975 | H  | 21.45892 | 24.88640 | 25.10635 |
| C | 17.97861 | 21.53679 | 22.49302 | C | 22.33811 | 16.62856 | 22.33603 | H  | 13.95956 | 11.88531 | 22.26636 | C  | 26.67270 | 28.63272 | 20.65260 |
| C | 15.84527 | 20.25754 | 22.34760 | C | 16.63012 | 16.55118 | 22.27941 | H  | 16.12190 | 12.45864 | 20.13328 | C  | 27.78403 | 29.45356 | 20.25254 |
| C | 18.65751 | 22.78306 | 22.57975 | C | 15.97264 | 15.31042 | 22.27602 | H  | 14.04246 | 13.42604 | 23.14437 | C  | 27.86608 | 30.13321 | 25.08862 |
| C | 17.91245 | 23.97086 | 22.65122 | C | 16.66174 | 14.09974 | 22.28599 | H  | 20.45240 | 13.24263 | 22.09379 | C  | 26.79795 | 30.28148 | 22.09680 |
| C | 16.51989 | 23.97914 | 22.63367 | C | 18.05826 | 14.14889 | 22.28559 | H  | 17.42575 | 11.81326 | 23.63843 | N  | 26.08223 | 29.12618 | 21.80859 |
| C | 15.86625 | 22.74792 | 22.53161 | C | 18.77165 | 15.35341 | 22.28541 | C  | 15.84909 | 10.99016 | 23.59802 | N  | 24.62506 | 29.88128 | 24.02622 |
| C | 16.55360 | 21.53020 | 22.45557 | C | 14.44508 | 20.20826 | 22.25384 | C  | 16.38474 | 11.92861 | 21.06048 | C  | 25.42022 | 31.01711 | 23.94777 |
| H | 18.43813 | 24.91798 | 22.73108 | C | 13.74447 | 19.00784 | 22.15960 | H  | 17.46926 | 11.75047 | 21.05127 | C  | 25.02412 | 31.99045 | 24.93023 |
| H | 14.77776 | 22.74224 | 22.52083 | C | 14.48492 | 17.82290 | 22.17204 | H  | 15.88204 | 10.94938 | 21.05346 | C  | 23.99007 | 31.44670 | 25.63025 |
| C | 15.70129 | 25.27219 | 22.73047 | C | 15.88190 | 17.80562 | 22.26312 | C  | 23.19379 | 12.89380 | 22.02800 | C  | 23.76578 | 30.13321 | 25.08862 |
| C | 14.81967 | 25.21792 | 23.99555 | H | 13.88546 | 21.13923 | 22.24581 | C  | 22.30805 | 11.64407 | 21.92329 | C  | 26.48949 | 31.20775 | 23.08323 |
| H | 15.43935 | 25.12546 | 24.89943 | H | 13.94716 | 16.87932 | 22.09884 | H  | 21.67592 | 11.51558 | 22.81458 | C  | 27.30552 | 32.45327 | 23.19437 |
| H | 14.21964 | 26.13694 | 24.08043 | H | 14.88652 | 15.29021 | 22.27556 | H  | 21.65639 | 11.67862 | 21.03744 | C  | 26.94281 | 33.59771 | 22.45491 |
| C | 16.59071 | 26.52126 | 22.81476 | H | 18.60724 | 13.20901 | 22.29321 | H  | 22.94330 | 10.75069 | 21.83480 | C  | 27.71782 | 34.75574 | 22.57713 |
| H | 17.23162 | 26.62711 | 21.92691 | H | 24.11484 | 15.42179 | 22.22761 | C  | 24.07531 | 12.96927 | 20.76356 | C  | 28.84340 | 34.80665 | 23.40735 |
| H | 15.95781 | 27.41852 | 22.87729 | H | 25.03803 | 17.03532 | 22.43752 | H  | 24.76668 | 13.82291 | 20.79875 | C  | 29.18194 | 33.65893 | 24.13081 |
| C | 14.80074 | 25.40228 | 21.48463 | H | 14.12832 | 24.36370 | 23.97193 | H  | 24.67646 | 12.05239 | 20.66486 | C  | 28.43155 | 32.48027 | 24.03990 |
| H | 15.40535 | 25.44137 | 20.56681 | C | 12.21616 | 18.94664 | 22.04839 | C  | 24.09432 | 12.74765 | 23.27250 | H  | 23.42825 | 31.86820 | 26.45846 |
| H | 14.10575 | 24.55557 | 21.39442 | C | 11.57472 | 20.34154 | 22.04010 | H  | 24.78240 | 13.59799 | 23.37863 | H  | 25.49810 | 32.95968 | 25.05287 |
| H | 14.20277 | 26.32457 | 21.54399 | H | 11.78789 | 20.89445 | 22.96714 | H  | 23.48840 | 12.68845 | 24.18848 | H  | 28.40325 | 29.25818 | 19.38222 |
| H | 17.23483 | 26.50619 | 23.70656 | H | 11.92188 | 20.94446 | 21.18776 | H  | 24.69930 | 11.83090 | 23.19870 | H  | 28.56550 | 31.02420 | 21.18288 |
| C | 22.30944 | 19.11745 | 22.47932 | H | 10.48264 | 20.24286 | 21.95559 | H  | 23.45574 | 13.07456 | 19.86091 | C  | 29.67808 | 36.05689 | 23.49775 |
| C | 27.31273 | 18.77554 | 21.40489 | C | 22.10440 | 20.60923 | 26.86872 | H  | 33.98073 | 17.47880 | 25.10422 | H  | 30.36985 | 36.13202 | 22.64304 |
| N | 28.69178 | 18.69323 | 21.27463 | C | 20.78970 | 30.09903 | 26.73188 | H  | 33.92728 | 16.41376 | 23.69969 | H  | 29.05052 | 36.95968 | 23.48642 |
| N | 28.65884 | 19.96585 | 23.71880 | C | 20.06986 | 30.43774 | 27.88269 | H  | 35.20485 | 16.19629 | 24.92356 | H  | 30.28379 | 36.06980 | 24.41421 |
| C | 27.29041 | 19.74182 | 23.63292 | C | 20.61615 | 30.29654 | 29.16334 | Ni | 30.05177 | 19.30051 | 22.53019 | C  | 25.73893 | 33.57643 | 21.55071 |
| C | 26.61583 | 20.25616 | 24.79678 | C | 21.92381 | 29.81313 | 29.27255 | H  | 37.32526 | 16.98707 | 24.32553 | H  | 24.82377 | 33.32493 | 22.10818 |
| C | 27.56204 | 20.86099 | 25.56647 | C | 22.68039 | 29.46679 | 28.14677 | H  | 37.82434 | 20.36238 | 21.71010 | H  | 25.59224 | 34.55119 | 21.06750 |
| C | 28.82079 | 20.68565 | 24.89532 | C | 19.80769 | 30.62866 | 30.38968 | C  | 26.65950 | 18.37240 | 20.18648 | H  | 25.84516 | 32.81324 | 20.76427 |
| C | 30.10588 | 17.77469 | 19.46256 | H | 19.16316 | 31.50343 | 30.22259 | H  | 25.58543 | 18.37782 | 20.03367 | C  | 28.82270 | 31.26189 | 24.83379 |
| C | 26.62573 | 19.20131 | 22.53735 | H | 19.14998 | 29.78875 | 30.66677 | H  | 27.63980 | 18.01801 | 19.31052 | H  | 28.01229 | 30.94918 | 25.51011 |
| C | 30.01616 | 21.19248 | 25.38778 | H | 20.45456 | 30.83711 | 31.25292 | H  | 27.44186 | 21.37820 | 26.51348 | H  | 29.02708 | 30.40441 | 24.17435 |
| H | 25.55026 | 20.16923 | 24.98063 | C | 20.16745 | 30.25380 | 25.36930 | C  | 29.99119 | 22.04308 | 26.61485 | H  | 29.72005 | 31.45504 | 25.43602 |
| C | 31.28782 | 17.88496 | 20.18279 | H | 20.05622 | 29.27878 | 24.86948 | C  | 29.75978 | 23.42913 | 26.50199 | Ni | 24.64024 | 28.32637 | 22.84873 |
| C | 32.54150 | 17.35170 | 19.72173 | H | 19.17509 | 30.71789 | 25.44024 | C  | 29.73842 | 24.20863 | 27.66389 | H  | 30.05516 | 33.67912 | 24.78899 |
| C | 33.47524 | 17.66971 | 20.66128 | H | 20.79444 | 30.87261 | 24.70995 | C  | 29.93299 | 23.64947 | 28.93179 | H  | 27.43171 | 35.64424 | 22.00699 |
| C | 32.79785 | 18.41996 | 21.68528 | C | 24.08423 | 28.94509 | 28.30355 | C  | 30.15814 | 22.27187 | 29.01736 | C  | 23.85538 | 24.93093 | 20.45159 |
| N | 31.44075 | 18.52247 | 21.40658 | H | 24.20044 | 27.96040 | 27.82572 | C  | 30.19070 | 21.45582 | 27.88042 | H  | 23.29809 | 24.02157 | 20.25343 |
| N | 31.41663 | 20.02185 | 23.71865 | H | 24.81468 | 29.61432 | 27.82310 | C  | 29.87342 | 24.50291 | 30.17142 | C  | 24.76237 | 25.56036 | 19.65540 |
| C | 32.79272 | 19.85824 | 23.63410 | H | 24.35162 | 28.84871 | 29.36393 | H  | 30.29554 | 25.50211 | 29.99257 | H  | 21.37721 | 27.08853 | 26.69956 |
| C | 33.46448 | 20.63947 | 24.63831 | H | 19.05185 | 30.82256 | 27.77368 | H  | 28.83186 | 24.64426 | 30.50316 | H  | 28.54868 | 15.25072 | 19.61864 |
| C | 32.49827 | 21.28522 | 25.34867 | H | 22.37138 | 29.69950 | 30.26395 | H  | 30.42272 | 24.04066 | 31.00329 | H  | 29.39576 | 13.87453 | 18.86974 |
| C | 31.23314 | 20.87418 | 24.80049 | C | 26.92232 | 27.20654 | 18.63245 | C  | 29.53910 | 24.06363 | 25.15414 | H  | 30.26835 | 15.01140 | 19.93155 |
| C | 33.46601 | 19.05321 | 22.72479 | C | 27.95216 | 26.24262 | 18.60141 | H  | 28.63176 | 23.66847 | 24.67151 | C  | 30.78304 | 19.39517 | 17.13110 |
| C | 34.94932 | 18.91623 | 22.82882 | C | 28.58223 | 25.96583 | 17.38365 | H  | 29.43098 | 25.15230 | 25.24421 | H  | 29.99417 | 19.93385 | 17.67736 |
| C | 35.78825 | 19.81153 | 22.13399 | C | 28.21578 | 26.61292 | 16.19764 | H  | 30.37485 | 23.85219 | 24.47000 | H  | 31.71185 | 19.53243 | 17.70671 |
| C | 37.17498 | 19.66399 | 22.24573 | C | 27.19110 | 27.56195 | 16.25450 | C  | 30.42955 | 19.97486 | 28.01362 | H  | 30.91406 | 19.87152 | 16.15061 |
| C | 37.74985 | 18.65203 | 23.02263 | C | 26.53687 | 27.87298 | 17.45281 | H  | 29.61590 | 19.39602 | 27.55055 | H  | 29.61526 | 14.15699 | 16.56152 |
| C | 36.89654 | 17.78047 | 23.70680 | C | 28.89629 | 26.28071 | 14.89572 | H  | 31.35802 | 19.67176 | 27.50534 | H  | 30.69169 | 17.94643 | 14.84153 |
| C | 35.50360 | 17.89494 | 23.62493 | H | 29.98743 | 26.21538 | 15.01882 | H  | 30.50432 | 19.68250 | 29.06920 | H  | 27.54514 | 17.65710 | 18.29081 |
| C | 32.60612 | 21.96210 | 26.19087 | H | 28.55560 | 25.30717 | 14.50791 | H  | 29.56457 | 25.28460 | 27.57297 | H  | 25.11901 | 25.27591 | 18.67009 |
| H | 34.54267 | 20.67404 | 24.76312 | H | 28.68239 | 27.03679 | 14.12798 | H  | 30.31301 | 21.81464 | 29.99873 | H  | 35.99630 | 21.52322 | 20.83639 |
| H | 32.66591 | 16.80610 | 18.79103 | C | 28.37397 | 25.52427 | 19.85619 | C  | 30.12880 | 17.15066 | 18.10626 | H  | 34.57558 | 20.50707 | 20.48258 |
| H | 34.53831 | 17.44894 | 20.66972 | H | 27.56632 | 24.88053 | 20.23835 | C  | 29.82791 | 15.78058 | 17.95621 |    |          |          |          |

# tri-porphyrin-HBC 14

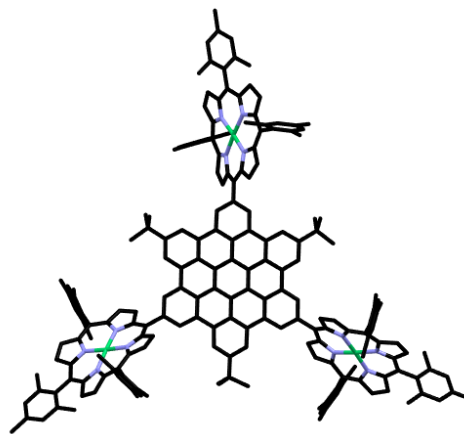

## Cartesian Coordinates (Angstroms)

|   | X        | Y        | Z        |   | X        | Y        | Z        |   | X        | Y        | Z        |    |          |          |          |
|---|----------|----------|----------|---|----------|----------|----------|---|----------|----------|----------|----|----------|----------|----------|
| C | 36.12622 | 26.83677 | 21.96315 | C | 34.06502 | 25.53158 | 22.22786 | C | 27.41475 | 19.41083 | 21.50110 | C  | 38.20480 | 41.05437 | 22.74925 |
| C | 35.37409 | 28.00135 | 22.10248 | C | 31.86870 | 26.67922 | 22.43536 | H | 28.49790 | 19.26258 | 21.38774 | C  | 39.07000 | 42.13597 | 22.95082 |
| C | 35.44935 | 25.61575 | 22.03937 | C | 31.11833 | 27.88599 | 22.51167 | H | 26.94071 | 18.41854 | 21.55047 | C  | 40.20007 | 42.03567 | 23.76896 |
| C | 33.13625 | 31.64780 | 22.64812 | C | 29.02815 | 26.58210 | 22.56690 | C | 37.64262 | 26.85243 | 21.73576 | C  | 40.45112 | 40.81194 | 24.39871 |
| C | 33.98258 | 27.97974 | 22.29296 | C | 29.78010 | 25.37506 | 22.51118 | C | 38.33550 | 26.11589 | 22.90132 | C  | 39.61060 | 39.70635 | 24.22608 |
| C | 31.79758 | 29.15530 | 22.53250 | C | 31.20027 | 25.42346 | 22.44476 | H | 38.11671 | 26.60855 | 23.85990 | H  | 34.54966 | 39.35831 | 26.61879 |
| C | 33.22000 | 29.21397 | 22.44610 | C | 31.96221 | 24.20095 | 22.40058 | H | 38.00351 | 25.07068 | 22.97544 | H  | 36.72255 | 40.35228 | 25.30275 |
| C | 33.85759 | 30.46047 | 22.51740 | C | 29.10421 | 24.10400 | 22.53789 | H | 39.42642 | 26.11413 | 22.75450 | H  | 39.05321 | 37.02165 | 19.17555 |
| C | 31.74321 | 31.58593 | 22.69980 | C | 27.58898 | 26.53355 | 22.59929 | C | 37.96711 | 26.13081 | 20.41117 | H  | 39.52015 | 38.81608 | 21.17790 |
| C | 31.05430 | 30.36691 | 22.64593 | C | 31.30424 | 22.93727 | 22.45888 | H | 37.48400 | 26.63562 | 19.56187 | C  | 41.13266 | 43.20465 | 23.94751 |
| H | 34.94344 | 30.52818 | 22.48564 | C | 32.07425 | 21.76607 | 22.44954 | H | 39.05416 | 26.12797 | 20.23805 | H  | 41.94719 | 43.17663 | 23.20544 |
| H | 31.19920 | 32.52497 | 22.77729 | C | 33.46902 | 21.80055 | 22.39876 | C | 38.20627 | 28.27881 | 21.65995 | H  | 40.60645 | 44.16082 | 23.81892 |
| C | 29.69776 | 27.83727 | 22.57667 | C | 34.10538 | 23.04135 | 22.33330 | H | 37.76260 | 28.85048 | 20.83103 | H  | 41.59864 | 43.19846 | 24.94292 |
| C | 28.93805 | 29.05789 | 22.65124 | C | 33.38459 | 24.24255 | 22.31469 | H | 38.03785 | 28.83516 | 22.59398 | C  | 36.99469 | 41.20286 | 21.86561 |
| C | 26.82528 | 27.73729 | 22.63489 | C | 27.68496 | 24.04192 | 22.58951 | H | 39.29207 | 28.23609 | 21.49081 | H  | 36.06737 | 40.98734 | 22.41835 |
| C | 29.59685 | 30.31716 | 22.69400 | C | 27.05260 | 22.79070 | 22.67088 | H | 37.62578 | 25.08610 | 20.42187 | H  | 36.92677 | 42.22118 | 21.46107 |
| C | 28.83132 | 31.49143 | 22.77658 | C | 27.76534 | 21.59383 | 22.67962 | H | 35.88210 | 28.96007 | 22.04574 | H  | 37.02779 | 40.49694 | 21.02139 |
| C | 27.43919 | 31.47391 | 22.81541 | C | 29.15893 | 21.66958 | 22.60046 | C | 35.86791 | 34.49959 | 20.22536 | C  | 39.90795 | 38.40470 | 24.92217 |
| C | 26.80507 | 30.22904 | 22.76726 | C | 29.84619 | 22.88727 | 22.53144 | C | 34.55867 | 33.37756 | 21.58882 | H  | 39.08568 | 38.11453 | 25.59426 |
| C | 27.51346 | 29.02457 | 22.68555 | C | 25.42608 | 27.65801 | 22.61914 | N | 35.33731 | 34.52317 | 21.50996 | H  | 40.02409 | 37.58296 | 24.19909 |
| H | 29.34038 | 32.45033 | 22.80913 | C | 24.75752 | 26.43357 | 22.56236 | N | 34.20519 | 35.05397 | 23.96131 | H  | 40.82919 | 38.47632 | 25.51493 |
| H | 25.71729 | 30.20223 | 22.79822 | C | 25.51172 | 25.25958 | 22.53753 | C | 33.69483 | 33.76856 | 23.82472 | Ni | 35.52457 | 35.93747 | 22.83329 |
| C | 26.59940 | 32.75330 | 22.90663 | C | 26.91210 | 25.27901 | 22.57690 | C | 32.88311 | 33.42111 | 24.96273 | H  | 41.32577 | 40.71285 | 25.04781 |
| C | 25.74271 | 32.70707 | 24.18885 | H | 24.82033 | 28.56183 | 22.64421 | C | 32.83272 | 34.52190 | 25.76305 | H  | 38.85030 | 43.08599 | 22.45547 |
| H | 26.38085 | 32.64819 | 25.08272 | H | 24.97653 | 24.31526 | 22.46260 | C | 33.64873 | 35.52854 | 25.14140 | C  | 34.56361 | 32.67082 | 20.33376 |
| H | 25.12529 | 33.61510 | 24.26482 | H | 25.96925 | 22.75278 | 22.74221 | C | 36.85488 | 35.34496 | 19.73613 | H  | 34.00763 | 31.75984 | 20.13845 |
| C | 27.46732 | 34.01922 | 22.95270 | H | 29.72675 | 20.74090 | 22.60080 | C | 33.83648 | 32.95764 | 22.70277 | C  | 35.36226 | 33.37582 | 19.48539 |
| H | 28.08723 | 34.12408 | 22.04989 | H | 35.19342 | 23.05307 | 22.32491 | C | 33.83644 | 36.79271 | 25.68623 | H  | 32.30837 | 34.65650 | 26.70429 |
| H | 26.81891 | 34.90519 | 23.01509 | H | 36.02464 | 24.69780 | 21.93178 | H | 32.40765 | 32.45722 | 25.11039 | C  | 33.07007 | 37.17336 | 26.91003 |
| C | 25.67451 | 32.84264 | 21.67457 | H | 25.06865 | 31.83915 | 24.19739 | C | 37.39341 | 36.35790 | 20.51948 | C  | 31.77649 | 37.17173 | 26.78399 |
| H | 26.26292 | 32.88031 | 20.74608 | C | 27.08044 | 20.22472 | 22.76873 | C | 38.52241 | 37.15177 | 20.11386 | C  | 31.07147 | 38.06494 | 27.94215 |
| H | 24.99678 | 31.97963 | 21.60983 | C | 27.59982 | 19.47277 | 24.01212 | C | 38.75825 | 38.04487 | 21.11538 | C  | 31.61195 | 37.87910 | 29.21863 |
| H | 25.05766 | 33.75266 | 21.72933 | H | 27.37150 | 20.03205 | 24.93123 | C | 37.75319 | 37.81967 | 22.12006 | C  | 32.89712 | 37.33553 | 29.31774 |
| H | 28.12936 | 34.02954 | 23.83152 | C | 25.55341 | 20.34405 | 22.87866 | N | 36.93474 | 36.75352 | 21.76829 | C  | 33.63787 | 36.97770 | 28.18583 |
| C | 33.30326 | 26.73126 | 22.32684 | H | 25.11843 | 20.84289 | 21.99983 | N | 35.61913 | 37.41976 | 24.09139 | C  | 30.82251 | 38.22539 | 30.45325 |
| H | 31.79932 | 38.55025 | 24.78558 | H | 25.11043 | 19.33959 | 22.94295 | C | 36.50140 | 38.49145 | 24.08110 | H  | 30.10556 | 39.03476 | 30.25751 |
| C | 35.01565 | 36.38827 | 28.33418 | H | 27.04810 | 19.92406 | 20.60010 | C | 36.17499 | 39.43264 | 25.11931 | H  | 30.24630 | 37.35571 | 30.80900 |
| H | 35.08874 | 35.41280 | 27.82959 | H | 25.24977 | 20.90061 | 23.77792 | C | 35.08743 | 38.93839 | 25.77399 | H  | 31.48048 | 38.53817 | 31.27618 |
| H | 35.77974 | 37.03565 | 27.87658 | H | 31.59491 | 20.78985 | 22.48941 | C | 34.76984 | 37.67618 | 25.16062 | C  | 31.15950 | 37.92434 | 25.42588 |
| H | 35.27144 | 36.24997 | 29.39286 | H | 28.68749 | 19.31937 | 23.97216 | C | 37.56547 | 38.66592 | 23.20510 | H  | 31.03003 | 36.96676 | 24.89770 |
| H | 30.07060 | 38.49423 | 27.84172 | H | 27.12291 | 18.48322 | 24.08308 | C | 38.48058 | 39.83132 | 23.39348 | H  | 30.17631 | 38.40570 | 25.50994 |
| C | 33.33967 | 37.18375 | 30.30624 | C | 38.87290 | 15.19723 | 20.60644 | C | 32.85188 | 15.94373 | 29.43735 | N  | 21.18964 | 25.48073 | 23.47690 |
| C | 37.39241 | 35.11989 | 18.36139 | C | 37.79413 | 15.41248 | 21.53393 | C | 32.06909 | 15.85215 | 28.28160 | C  | 22.20035 | 24.22538 | 25.51767 |
| C | 38.40430 | 34.16175 | 18.14727 | N | 37.32307 | 16.71542 | 21.44802 | C | 32.58979 | 16.12716 | 27.01191 | C  | 20.96927 | 24.55586 | 24.48772 |
| C | 38.89226 | 33.97194 | 16.84942 | N | 35.86330 | 15.97360 | 23.65542 | C | 32.25841 | 15.68375 | 30.79689 | C  | 19.73910 | 24.02383 | 24.85780 |
| C | 38.40190 | 34.70172 | 15.76132 | C | 36.38803 | 14.71722 | 23.37849 | H | 33.01107 | 15.29310 | 31.49600 | C  | 18.72211 | 28.18531 | 20.27679 |
| C | 37.40068 | 35.64883 | 16.00035 | C | 35.97329 | 13.76143 | 24.37122 | H | 31.85638 | 16.61216 | 31.23466 | C  | 17.51742 | 28.88429 | 19.91642 |
| C | 36.88647 | 35.87241 | 17.28261 | C | 35.24176 | 14.44453 | 25.29580 | H | 31.43011 | 14.96336 | 30.74312 | C  | 16.57829 | 28.56296 | 20.85050 |
| C | 38.91972 | 34.45580 | 14.36865 | C | 35.17910 | 15.81154 | 24.85171 | C | 36.20629 | 16.98013 | 27.93214 | C  | 17.19540 | 27.63431 | 21.76042 |
| H | 39.96859 | 34.12759 | 14.38250 | C | 37.31433 | 14.42476 | 22.38545 | H | 36.32299 | 17.94540 | 27.41672 | N  | 18.52876 | 27.43378 | 21.42659 |
| H | 38.33717 | 33.66725 | 13.86475 | C | 37.86539 | 13.04040 | 22.28096 | H | 36.67137 | 17.05831 | 28.92341 | N  | 18.43735 | 25.60338 | 23.47194 |
| H | 38.84937 | 35.36029 | 13.74835 | C | 38.97033 | 12.66043 | 23.07052 | H | 36.77175 | 16.24120 | 27.34352 | C  | 17.08467 | 25.91202 | 23.45980 |
| C | 38.95859 | 33.35712 | 19.29332 | C | 39.46676 | 11.35700 | 22.95741 | C | 31.71428 | 16.01576 | 25.79130 | C  | 16.35015 | 25.01403 | 24.31130 |
| H | 38.18667 | 32.70684 | 19.73392 | C | 38.89875 | 10.42280 | 22.08441 | H | 31.59523 | 16.99163 | 25.29497 | C  | 17.25391 | 24.14432 | 24.84401 |
| H | 39.79149 | 32.72348 | 18.96153 | C | 37.80256 | 10.82320 | 21.31366 | H | 32.15153 | 15.33567 | 25.04448 | C  | 18.54958 | 24.53889 | 24.35751 |
| H | 39.31873 | 34.00879 | 20.10369 | C | 37.27597 | 12.11779 | 21.39410 | H | 30.71653 | 15.64281 | 26.05750 | C  | 16.48492 | 26.92642 | 22.72229 |
| C | 35.81088 | 36.90286 | 17.50420 | H | 34.77573 | 14.07678 | 26.20519 | H | 34.82680 | 16.37938 | 30.18626 | C  | 15.02676 | 27.19384 | 22.90355 |
| H | 34.93367 | 36.46475 | 18.00396 | H | 36.24773 | 12.71071 | 24.35836 | H | 31.01966 | 15.55648 | 28.36797 | C  | 14.08087 | 26.51038 | 22.11277 |
| H | 36.16697 | 37.71705 | 18.15443 | H | 39.78336 | 16.60545 | 19.16296 | C | 38.67960 | 18.97461 | 18.70064 | C  | 12.71952 | 26.76994 | 22.31026 |
| H | 35.48435 | 37.34166 | 16.55237 | H | 39.40402 | 14.25646 | 20.49639 | C | 38.35407 | 18.55701 | 17.39352 | C  | 12.27344 | 27.68930 | 23.26528 |
| H | 39.68191 | 33.23308 | 16.68606 | C | 39.46939 | 9.03452  | 21.96047 | C | 39.15302 | 18.98577 | 16.32803 | C  | 13.23156 | 28.35249 | 24.03937 |
| H | 37.00677 | 36.23429 | 15.16478 | H | 40.28882 | 9.00929  | 21.22368 | C | 40.26236 | 19.81592 | 16.52291 | C  | 14.60186 | 28.12070 | 23.87654 |
| C | 36.79284 | 19.34365 | 20.27493 | H | 39.88142 | 8.68307  | 22.91706 | C | 40.56591 | 20.21422 | 17.82862 | H  | 17.08557 | 23.32337 | 25.53453 |
| C | 35.12596 | 20.22158 | 21.41071 | H | 38.70814 | 8.31529  | 21.62770 | C | 39.79134 | 19.81090 | 18.92272 | H  | 15.27543 | 25.05741 | 24.46065 |
| N | 35.99088 | 19.13350 | 21.38844 | C | 39.60898 | 13.63746 | 24.02201 | C | 41.08707 | 20.28773 | 15.35453 | H  | 15.54379 | 28.88631 | 20.91768 |
| N | 34.74410 | 18.49088 | 23.75128 | H | 11.98696 | 26.23372 | 21.70037 | H | 20.60736 | 32.11281 | 16.99266 | C  | 23.18301 | 24.95387 | 24.55182 |
| C | 34.16231 | 19.73977 | 23.58692 | C | 22.36443 | 27.93980 | 19.39878 | C | 22.62703 | 26.968   |          |    |          |          |          |

|    |          |          |          |   |          |          |          |
|----|----------|----------|----------|---|----------|----------|----------|
| C  | 33.58078 | 19.10827 | 25.66934 | H | 40.30291 | 19.40510 | 20.98639 |
| C  | 34.34755 | 18.08111 | 25.01910 | H | 41.05844 | 20.87196 | 20.31049 |
| C  | 37.84178 | 18.53416 | 19.85574 | H | 15.17075 | 25.97557 | 20.32132 |
| C  | 34.25712 | 20.54113 | 22.45072 | C | 15.60538 | 28.84808 | 24.73165 |
| C  | 34.52410 | 16.81301 | 25.55734 | H | 41.14745 | 19.52007 | 14.57001 |
| H  | 32.93671 | 21.07575 | 24.90586 | H | 40.64303 | 21.18640 | 14.89619 |
| C  | 38.08003 | 17.29629 | 20.43843 | H | 42.10924 | 20.54766 | 15.66250 |
| C  | 39.06547 | 16.37172 | 19.94343 | C | 37.16481 | 17.66792 | 17.14294 |
| C  | 19.85693 | 21.59808 | 25.49104 | H | 36.23983 | 18.11925 | 17.53322 |
| C  | 19.81935 | 20.59561 | 26.46736 | H | 37.03244 | 17.48203 | 16.06904 |
| C  | 19.63861 | 20.89120 | 27.82234 | H | 37.27750 | 16.69713 | 17.64989 |
| C  | 19.48929 | 22.23282 | 28.19000 | H | 16.21106 | 28.14377 | 25.32252 |
| C  | 19.51758 | 23.26562 | 27.24639 | H | 16.31100 | 29.42610 | 24.11556 |
| C  | 19.63345 | 19.80111 | 28.86136 | C | 10.80543 | 27.97738 | 23.43917 |
| H  | 19.30829 | 18.84152 | 28.43598 | H | 10.49690 | 28.83885 | 22.82458 |
| H  | 20.64213 | 19.65017 | 29.27933 | H | 10.18869 | 27.12041 | 23.13463 |
| H  | 18.96831 | 20.04992 | 29.70034 | H | 10.56537 | 28.22149 | 24.48369 |
| C  | 20.06349 | 21.24417 | 24.04189 | C | 14.52160 | 25.50891 | 21.07820 |
| H  | 21.00251 | 21.67293 | 23.65806 | H | 15.10637 | 24.69475 | 21.53321 |
| H  | 20.10201 | 20.15569 | 23.90430 | H | 13.65666 | 25.06754 | 20.56607 |
| H  | 19.25601 | 21.64583 | 23.41130 |   |          |          |          |
| C  | 19.36288 | 24.69853 | 27.68296 |   |          |          |          |
| H  | 20.21307 | 25.31171 | 27.34715 |   |          |          |          |
| H  | 18.45846 | 25.15367 | 27.25045 |   |          |          |          |
| H  | 19.29492 | 24.77065 | 28.77631 |   |          |          |          |
| H  | 19.93355 | 19.55312 | 26.15728 |   |          |          |          |
| H  | 19.34617 | 22.48654 | 29.24418 |   |          |          |          |
| C  | 19.91866 | 29.02729 | 18.26307 |   |          |          |          |
| C  | 20.30193 | 30.38396 | 18.23667 |   |          |          |          |
| C  | 20.31360 | 31.05947 | 17.01099 |   |          |          |          |
| C  | 19.95980 | 30.42674 | 15.81459 |   |          |          |          |
| C  | 19.57311 | 29.08363 | 15.86889 |   |          |          |          |
| C  | 19.54463 | 28.37130 | 17.07306 |   |          |          |          |
| C  | 20.02094 | 31.16316 | 14.50248 |   |          |          |          |
| H  | 19.83949 | 32.23872 | 14.63687 |   |          |          |          |
| H  | 21.01420 | 31.05452 | 14.03687 |   |          |          |          |
| H  | 19.28163 | 30.77476 | 13.78804 |   |          |          |          |
| C  | 20.68770 | 31.10231 | 19.50316 |   |          |          |          |
| H  | 21.59766 | 30.66896 | 19.94702 |   |          |          |          |
| H  | 20.87540 | 32.16634 | 19.30825 |   |          |          |          |
| H  | 19.89826 | 31.02261 | 20.26592 |   |          |          |          |
| C  | 19.11913 | 26.92688 | 17.09386 |   |          |          |          |
| H  | 19.88416 | 26.29018 | 17.56320 |   |          |          |          |
| H  | 18.19697 | 26.79174 | 17.68027 |   |          |          |          |
| H  | 18.93628 | 26.55633 | 16.07679 |   |          |          |          |
| H  | 38.89584 | 13.96888 | 24.79260 |   |          |          |          |
| H  | 40.47419 | 13.18665 | 24.52539 |   |          |          |          |
| H  | 39.94723 | 14.54412 | 23.49740 |   |          |          |          |
| C  | 36.09449 | 12.51458 | 20.54889 |   |          |          |          |
| H  | 35.25689 | 12.86539 | 21.17087 |   |          |          |          |
| H  | 36.34943 | 13.34469 | 19.87198 |   |          |          |          |
| H  | 35.74382 | 11.67015 | 19.94123 |   |          |          |          |
| Ni | 35.97962 | 17.57771 | 22.55969 |   |          |          |          |
| H  | 37.33867 | 10.10697 | 20.62967 |   |          |          |          |
| H  | 40.32211 | 11.06365 | 23.57268 |   |          |          |          |
| C  | 35.34098 | 21.06203 | 20.26080 |   |          |          |          |
| H  | 34.76132 | 21.94886 | 20.02736 |   |          |          |          |
| C  | 36.39311 | 20.53387 | 19.57542 |   |          |          |          |
| H  | 33.18258 | 19.02860 | 26.67626 |   |          |          |          |
| C  | 33.94348 | 16.50394 | 26.89775 |   |          |          |          |
| C  | 34.75607 | 16.59122 | 28.04598 |   |          |          |          |
| C  | 34.19459 | 16.30984 | 29.29655 |   |          |          |          |
| C  | 23.27386 | 26.38541 | 22.50324 |   |          |          |          |
| C  | 23.31645 | 27.47920 | 20.25746 |   |          |          |          |
| H  | 22.27856 | 23.53645 | 25.98734 |   |          |          |          |
| H  | 24.23948 | 24.98873 | 24.79541 |   |          |          |          |
| H  | 24.39316 | 27.46229 | 20.12522 |   |          |          |          |
| H  | 22.49266 | 28.39621 | 18.42197 |   |          |          |          |
| C  | 19.90558 | 28.27667 | 19.55357 |   |          |          |          |
| H  | 17.42705 | 29.53859 | 19.05448 |   |          |          |          |
| H  | 19.28403 | 28.57155 | 14.94681 |   |          |          |          |
| H  | 38.89949 | 18.65997 | 15.31525 |   |          |          |          |
| H  | 41.43276 | 20.85742 | 18.00451 |   |          |          |          |
| H  | 35.61497 | 33.16178 | 18.45133 |   |          |          |          |
| H  | 36.86164 | 20.89324 | 18.66412 |   |          |          |          |
| C  | 21.09317 | 27.74512 | 20.04116 |   |          |          |          |
| N  | 21.25517 | 27.10406 | 21.26384 |   |          |          |          |
| H  | 15.10575 | 29.53825 | 25.42401 |   |          |          |          |
| Ni | 19.85249 | 26.40588 | 22.40998 |   |          |          |          |
| H  | 12.90460 | 29.07053 | 24.79682 |   |          |          |          |

**para-phenly-fused porphyrin-HBC p-Ph**

**Cartesian  
Coordinates  
(Angstroms)**

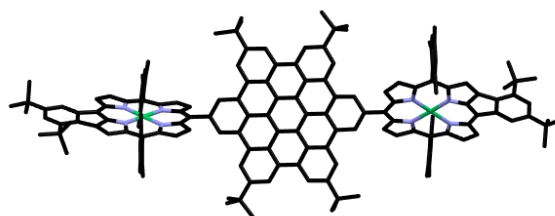

|    | X        | Y        | Z        |   | X        | Y        | Z        |   | X        | Y        | Z        |    |          |          |          |
|----|----------|----------|----------|---|----------|----------|----------|---|----------|----------|----------|----|----------|----------|----------|
| C  | 25.19369 | 18.82298 | 22.34785 | C | 22.34769 | 18.93808 | 22.36334 | H | 9.78423  | 6.31880  | 16.42930 | H  | 11.98991 | 19.02224 | 24.35264 |
| C  | 24.51776 | 20.04527 | 22.38412 | C | 23.02096 | 17.68594 | 22.32137 | H | 7.59771  | 6.51544  | 19.45889 | H  | 10.57844 | 18.54737 | 23.37063 |
| C  | 24.42514 | 17.66161 | 22.31852 | C | 20.90875 | 18.99929 | 22.36797 | C | 9.96164  | 3.99932  | 20.31147 | H  | 12.18694 | 19.16156 | 20.01521 |
| C  | 22.53278 | 23.86710 | 22.53031 | C | 20.24823 | 20.25902 | 22.41215 | C | 10.62916 | 3.60251  | 21.47099 | H  | 20.16864 | 13.16591 | 22.19791 |
| C  | 23.12110 | 20.13401 | 22.39891 | C | 18.06560 | 19.11632 | 22.37516 | H | 12.01731 | 4.24036  | 23.00294 | H  | 25.10712 | 20.96006 | 22.40278 |
| C  | 21.01763 | 21.47582 | 22.45367 | C | 18.72596 | 17.85684 | 22.33070 | H | 15.16003 | 14.53222 | 19.93460 | C  | 26.86675 | 30.09597 | 21.75767 |
| C  | 22.44242 | 21.42595 | 22.44766 | C | 20.14778 | 17.79828 | 22.32857 | H | 9.30529  | 3.28296  | 19.82601 | C  | 27.08833 | 28.37357 | 20.47779 |
| C  | 23.16591 | 22.62367 | 22.49836 | C | 20.81697 | 16.52383 | 22.28855 | H | 9.06315  | 3.59250  | 17.67949 | N  | 26.40631 | 28.83315 | 21.60469 |
| C  | 21.13846 | 23.91089 | 22.52851 | C | 17.95622 | 16.63998 | 22.29555 | H | 8.90863  | 13.00658 | 19.37486 | N  | 25.09367 | 26.49338 | 21.52623 |
| C  | 20.36328 | 22.74225 | 22.50694 | C | 16.62674 | 19.17749 | 22.36627 | H | 14.92803 | 8.99663  | 29.94687 | C  | 25.85823 | 26.29937 | 20.37922 |
| H  | 24.25341 | 22.61156 | 22.52467 | C | 20.06880 | 15.31497 | 22.25609 | H | 31.33601 | 33.34932 | 17.86644 | C  | 25.45303 | 25.10423 | 19.69850 |
| H  | 20.66278 | 24.88967 | 22.54231 | C | 20.74625 | 14.08539 | 22.22070 | H | 7.93634  | 4.79492  | 17.01952 | C  | 24.42584 | 24.56403 | 20.41568 |
| C  | 18.82652 | 20.31726 | 22.41676 | C | 22.13634 | 14.00019 | 22.21282 | C | 26.72691 | 18.80450 | 22.34477 | C  | 24.22919 | 25.40671 | 21.56413 |
| C  | 18.15750 | 21.59073 | 22.47998 | C | 22.85822 | 15.19626 | 22.24450 | C | 27.24384 | 19.50198 | 23.62035 | C  | 26.64497 | 31.09113 | 22.69407 |
| C  | 15.95379 | 20.42983 | 22.40394 | C | 22.24076 | 16.45226 | 22.28409 | H | 26.88741 | 18.98190 | 24.52151 | C  | 26.85154 | 27.14797 | 19.88442 |
| C  | 18.90543 | 22.79885 | 22.54250 | C | 16.53134 | 16.68887 | 22.29798 | H | 28.34455 | 19.50244 | 23.63398 | C  | 23.33596 | 25.11626 | 22.59583 |
| C  | 18.22741 | 24.02406 | 22.65418 | C | 15.80726 | 15.48949 | 22.29667 | C | 27.29464 | 17.37828 | 22.31170 | C  | 27.62554 | 26.75452 | 18.67090 |
| C  | 16.83737 | 24.10575 | 22.69801 | C | 16.44250 | 14.24775 | 22.26657 | H | 26.98390 | 16.83523 | 21.40665 | C  | 28.78255 | 25.96201 | 18.81104 |
| C  | 16.11599 | 22.91198 | 22.61002 | C | 17.83620 | 14.20552 | 22.24416 | H | 28.39357 | 17.42119 | 22.31246 | C  | 29.50652 | 25.61274 | 17.66567 |
| C  | 16.73375 | 21.66093 | 22.49584 | C | 18.61115 | 15.37353 | 22.26438 | C | 17.24234 | 19.56136 | 21.10277 | C  | 29.11150 | 26.02486 | 16.38855 |
| H  | 18.80495 | 24.94161 | 22.72197 | C | 14.55061 | 20.45659 | 22.34777 | H | 26.88919 | 19.08161 | 20.17821 | C  | 27.96130 | 26.81290 | 16.27625 |
| H  | 15.02924 | 22.96271 | 22.64522 | C | 13.78306 | 19.29638 | 22.26969 | H | 26.90088 | 20.60606 | 21.09169 | C  | 27.20881 | 27.18688 | 17.39556 |
| C  | 22.88298 | 12.66164 | 22.16864 | C | 14.45813 | 18.07299 | 22.25716 | H | 28.34314 | 19.56600 | 21.09064 | H  | 25.89452 | 24.75108 | 18.77136 |
| C  | 23.78777 | 12.54225 | 23.41247 | C | 15.85362 | 17.98206 | 22.30929 | H | 26.98420 | 16.79454 | 23.19124 | C  | 29.88660 | 25.60806 | 15.16662 |
| H  | 23.19014 | 12.57625 | 24.33510 | H | 14.04268 | 21.41700 | 22.35466 | H | 26.90551 | 20.54595 | 23.67798 | H  | 30.95176 | 25.46475 | 15.39619 |
| H  | 24.33719 | 11.58867 | 23.39182 | H | 13.86965 | 17.15937 | 22.19504 | H | 16.08915 | 25.43618 | 22.84826 | H  | 29.50692 | 24.65379 | 14.76632 |
| C  | 21.92686 | 11.46043 | 22.15053 | H | 14.71982 | 15.50034 | 22.33379 | C | 15.25391 | 25.40172 | 24.14545 | H  | 29.80363 | 26.35449 | 14.36429 |
| H  | 21.27620 | 11.46957 | 21.26352 | H | 18.31020 | 13.22654 | 22.21112 | H | 15.90212 | 25.26650 | 25.02358 | C  | 29.23878 | 25.50354 | 20.17094 |
| H  | 22.50959 | 10.52818 | 22.12531 | H | 23.94520 | 15.14048 | 22.23818 | H | 14.70103 | 26.34585 | 24.26669 | H  | 28.47940 | 24.86928 | 20.65387 |
| C  | 23.75297 | 12.60914 | 20.89532 | H | 24.93457 | 16.70254 | 22.29168 | C | 17.04215 | 26.63777 | 22.92131 | H  | 30.17181 | 24.92949 | 20.09975 |
| H  | 23.13005 | 12.69191 | 19.99272 | H | 24.52556 | 13.35562 | 23.45829 | H | 17.65123 | 26.73350 | 22.01027 | H  | 29.40744 | 26.35702 | 20.84525 |
| H  | 24.48911 | 13.42508 | 20.87234 | C | 12.25157 | 19.31622 | 22.19874 | H | 16.45782 | 27.56319 | 23.02879 | C  | 25.97790 | 28.03917 | 17.23461 |
| H  | 24.30254 | 11.65649 | 20.84937 | C | 11.68318 | 20.74216 | 22.21957 | C | 15.14976 | 25.63351 | 21.64036 | H  | 25.10028 | 27.56694 | 17.70133 |
| H  | 21.29025 | 11.43077 | 23.04740 | H | 11.95226 | 21.27482 | 23.14389 | H | 15.72098 | 25.66476 | 20.70108 | H  | 26.10244 | 29.01874 | 17.72200 |
| C  | 23.50346 | 27.52291 | 25.21149 | H | 12.03387 | 21.33499 | 21.36169 | H | 14.41323 | 24.82153 | 21.56072 | H  | 25.75550 | 28.21092 | 16.17343 |
| C  | 22.62981 | 26.54712 | 25.80618 | H | 10.58543 | 20.69931 | 22.16800 | H | 14.59752 | 26.58049 | 21.73977 | C  | 25.84855 | 30.82493 | 23.79684 |
| C  | 22.45210 | 25.56008 | 24.88597 | C | 11.79332 | 18.63082 | 20.89447 | H | 17.17918 | 26.57043 | 23.78587 | C  | 25.63007 | 31.67650 | 24.93236 |
| C  | 23.22880 | 25.92040 | 23.72704 | H | 12.13574 | 17.58786 | 20.83987 | H | 14.52274 | 24.58110 | 24.13667 | C  | 24.87732 | 30.97007 | 25.82072 |
| C  | 23.83993 | 28.71536 | 25.84320 | H | 10.69425 | 18.62882 | 20.83310 | C | 9.76045  | 12.41425 | 16.97358 | C  | 24.61356 | 29.68762 | 25.22149 |
| C  | 23.31393 | 28.97673 | 27.21735 | C | 11.67853 | 18.55013 | 23.40935 | C | 10.26189 | 12.06059 | 15.71647 | N  | 25.20801 | 29.59204 | 23.97393 |
| C  | 22.05475 | 29.58592 | 27.38627 | H | 12.01805 | 17.50514 | 23.42814 | C | 11.45880 | 11.33860 | 15.66245 | N  | 23.88744 | 27.12655 | 23.93746 |
| C  | 21.58384 | 29.81855 | 28.68408 | H | 30.10321 | 35.19794 | 24.34254 | C | 12.15377 | 10.97222 | 16.82058 | C  | 17.92009 | 8.02857  | 25.56052 |
| C  | 22.32697 | 29.46322 | 29.81412 | H | 29.20716 | 36.67006 | 24.80361 | H | 13.23757 | 13.42628 | 18.36175 | H  | 18.13511 | 8.95851  | 25.01157 |
| C  | 23.57159 | 28.85391 | 29.62001 | C | 29.58745 | 36.74276 | 22.11666 | C | 9.54679  | 12.46803 | 14.45553 | H  | 18.87529 | 7.56444  | 25.83888 |
| C  | 24.08012 | 28.60468 | 28.34070 | H | 29.26482 | 36.91268 | 21.07881 | H | 8.46202  | 12.54242 | 14.61537 | H  | 17.40350 | 7.36093  | 24.85409 |
| H  | 21.86708 | 24.65124 | 24.97710 | H | 29.64187 | 37.72231 | 22.61411 | H | 9.89454  | 13.45405 | 14.10674 | C  | 13.64584 | 9.73693  | 27.67604 |
| H  | 22.21276 | 26.62886 | 26.80532 | H | 27.22636 | 36.52426 | 22.89016 | H | 9.72773  | 11.75160 | 13.64208 | H  | 13.69007 | 10.74008 | 27.15232 |
| H  | 26.02317 | 32.68045 | 25.04578 | H | 26.84277 | 36.65047 | 21.86717 | C | 9.85299  | 12.45971 | 19.49428 | H  | 12.97027 | 9.09488  | 27.08990 |
| H  | 24.51786 | 31.27199 | 26.79984 | H | 27.30184 | 37.51882 | 23.35624 | H | 10.55284 | 13.09684 | 20.05673 | H  | 13.19553 | 9.89891  | 28.66405 |
| C  | 21.81527 | 29.74960 | 31.20121 | C | 29.09191 | 32.80191 | 20.49240 | H | 9.66342  | 11.57482 | 20.12108 | Ni | 13.94163 | 10.03845 | 22.24654 |
| H  | 22.45151 | 30.68508 | 31.59477 | H | 30.60320 | 36.32083 | 22.09876 | C | 13.43654 | 10.18941 | 16.72422 | C  | 15.55302 | 7.54315  | 28.15061 |
| H  | 20.72227 | 29.86061 | 31.21092 | H | 26.48685 | 35.94173 | 23.45735 | H | 14.25976 | 10.70476 | 17.24209 | H  | 8.82184  | 12.97184 | 17.03856 |
| H  | 22.08659 | 28.94796 | 31.90290 | C | 29.90938 | 32.47227 | 19.23422 | H | 13.33858 | 9.20071  | 17.19894 | H  | 11.86543 | 11.04754 | 14.68988 |
| C  | 21.22411 | 29.97800 | 26.19306 | C | 30.78068 | 33.64998 | 18.76718 | H | 13.72701 | 10.03911 | 15.67633 | C  | 11.22328 | 8.69460  | 19.30582 |
| H  | 20.98219 | 29.10286 | 25.57025 | H | 31.51798 | 33.94505 | 19.52834 | C | 13.24855 | 7.16936  | 23.16846 | H  | 10.63448 | 8.86871  | 18.41047 |
| H  | 20.28307 | 30.44849 | 26.50663 | H | 30.17667 | 34.53149 | 18.50604 | C | 13.48362 | 6.26659  | 24.25998 | C  | 11.33959 | 7.57954  | 20.10092 |
| H  | 21.76445 | 30.68386 | 25.54383 | C | 30.85915 | 31.29383 | 19.53599 | C | 14.24527 | 6.93314  | 25.17076 | C  | 11.63762 | 5.80173  | 21.57441 |
| C  | 25.42216 | 27.94393 | 28.16824 | H | 30.32945 | 30.41468 | 19.91989 | C | 14.49103 | 8.24566  | 24.63209 | C  | 10.94116 | 6.19076  | 20.37494 |
| H  | 25.33694 | 27.01154 | 27.58930 | H | 31.39979 | 30.99872 | 18.62338 | N | 13.88405 | 8.39699  | 23.39595 | C  | 11.48147 | 4.53106  | 22.10118 |
| H  | 26.11880 | 28.59253 | 27.61508 | C | 28.95018 | 32.12847 | 18.07493 | N | 15.15220 | 10.89071 | 23.49153 | C  | 10.46504 | 2.20523  | 22.08013 |
| H  | 25.87159 | 27.70628 | 29.14126 | H | 28.25982 | 31.31566 | 18.32728 | C | 15.54826 | 10.43343 | 24.74125 | C  | 9.90513  | 2.33978  | 23.51209 |
| Ni | 25.14391 | 28.00179 | 22.75820 | H | 28.34549 | 33.00854 | 17.81046 | C | 16.38479 | 11.40218 | 25.39753 | H  | 10.57011 | 2.93462  | 24.15395 |
| H  | 24.16575 | 28.55976 | 30.48986 | H | 29.52407 | 31.82784 | 17.18474 | C | 16.52803 | 12.44894 | 24.53966 | H  | 8.92084  | 2.83039  | 23.50108 |
| H  | 20.60516 | 30.28913 | 28.81340 | H | 31.60146 | 31.59002 | 20.29189 | C | 15.76918 | 12.12942 | 23.35736 | H  | 9.79158  | 1.34577  | 23.97160 |
| H  | 30.40767 | 25.00318 | 17.77718 | C | 29.19178 | 34.07375 | 21.09939 | C | 15.25045 | 9.19651  | 25.30162 | C  | 9.50746  | 1.31922  | 21.72094 |
| H  | 27.63737 | 27.14980 | 15.28747 | C | 28.47726 | 34.44809 | 22.23841 | C | 15.79271 | 8.86465  | 26.65392 | H  | 9.86701  | 1.16299  | 20.24312 |
| C  | 27.99450 | 29.38721 | 19.96975 | H | 27.03030 | 33.77830 | 23.      |   |          |          |          |    |          |          |          |

C 15.65422 12.98757 22.26878  
C 11.62909 11.34423 18.07482  
C 10.42379 12.06968 18.15653  
C 17.32170 7.84566 30.56996  
H 16.89769 6.88452 30.90338  
H 18.41515 7.73977 30.56641  
H 17.05073 8.59795 31.32466  
H 7.69180 4.17439 18.66432  
C 8.37028 6.81856 18.73680  
H 8.89170 7.68689 19.15504  
H 7.86708 7.13307 17.80941  
C 10.32383 5.99145 17.33142  
H 11.01651 6.78875 17.62400  
H 10.92475 5.10829 17.06853  
N 12.72810 9.22621 21.02614  
N 13.98673 11.59970 21.07723  
C 13.27149 11.81079 19.90149  
C 13.65198 13.05209 19.29312  
H 17.08003 13.37123 24.68646  
H 16.80141 11.27439 26.39194  
H 13.10086 5.25476 24.32845  
H 14.62015 6.58625 26.12897  
H 8.49640 1.74990 21.22216  
H 12.56290 2.07763 22.73442  
C 9.32130 5.63734 18.45022  
C 8.45749 4.47486 17.93388



# meta-phenyl-fused porphyrin-HBC *m*-Ph

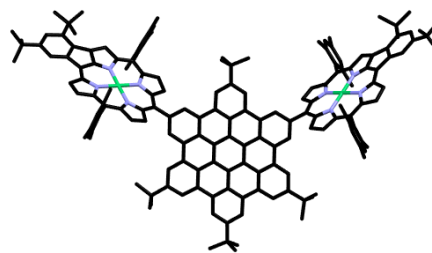

## Cartesian Coordinates (Angstroms)

|   | X        | Y        | Z        |   | X        | Y        | Z        |    | X        | Y        | Z        |    |          |          |          |
|---|----------|----------|----------|---|----------|----------|----------|----|----------|----------|----------|----|----------|----------|----------|
| C | 25.23495 | 18.82494 | 22.26414 | C | 23.06092 | 17.69194 | 22.29108 | H  | 10.60326 | 18.56145 | 23.29113 | H  | 30.23236 | 24.98945 | 20.09472 |
| C | 24.56191 | 20.04686 | 22.34866 | C | 20.95154 | 19.00664 | 22.37076 | H  | 12.26140 | 19.23346 | 19.97138 | H  | 29.42815 | 26.38474 | 20.85956 |
| C | 24.46459 | 17.66455 | 22.24017 | C | 20.29384 | 20.26796 | 22.42204 | C  | 15.67702 | 12.93624 | 22.25488 | C  | 25.97808 | 28.06213 | 17.27998 |
| C | 22.58688 | 23.87042 | 22.58427 | C | 18.10833 | 19.13008 | 22.36708 | C  | 16.06876 | 12.11031 | 23.49814 | H  | 25.10800 | 27.57991 | 17.75055 |
| C | 23.16635 | 20.13813 | 22.39764 | C | 18.76550 | 17.86983 | 22.32048 | H  | 15.83330 | 12.65913 | 24.42170 | H  | 26.09894 | 29.03937 | 17.77299 |
| C | 21.06629 | 21.48243 | 22.47701 | C | 20.18763 | 17.80765 | 22.32217 | C  | 14.15844 | 13.16031 | 22.28264 | H  | 25.74615 | 28.23930 | 16.22174 |
| C | 22.49098 | 21.43036 | 22.47448 | C | 20.85408 | 16.53114 | 22.27764 | H  | 13.81316 | 13.72560 | 21.40412 | C  | 25.85131 | 30.86449 | 23.80071 |
| C | 23.21721 | 22.62555 | 22.54615 | C | 17.99038 | 16.65661 | 22.28091 | H  | 13.64384 | 12.18840 | 22.27532 | C  | 25.62031 | 31.72514 | 24.92680 |
| C | 21.19255 | 23.91618 | 22.57455 | C | 16.66940 | 19.19343 | 22.35047 | H  | 15.74949 | 12.70470 | 20.07823 | C  | 24.87177 | 31.02010 | 25.81989 |
| C | 20.41488 | 22.74962 | 22.53792 | C | 20.09584 | 15.32447 | 22.24354 | H  | 13.84174 | 13.69806 | 23.18878 | C  | 24.62256 | 29.72910 | 25.23273 |
| H | 24.30446 | 22.60937 | 22.58171 | C | 20.76901 | 14.09698 | 22.19777 | H  | 20.21244 | 13.16346 | 22.14800 | N  | 25.22131 | 29.62727 | 23.98774 |
| H | 20.71872 | 24.89563 | 22.59287 | C | 22.16227 | 14.02013 | 22.20505 | H  | 17.14255 | 11.87611 | 23.50995 | N  | 23.92246 | 27.14791 | 23.97241 |
| C | 18.87254 | 20.32924 | 22.42020 | C | 22.89986 | 15.20334 | 22.24278 | H  | 15.51612 | 11.15840 | 23.51136 | C  | 23.53321 | 27.55318 | 25.24189 |
| C | 18.20617 | 21.60378 | 22.48357 | C | 22.27874 | 16.46042 | 22.26871 | C  | 16.02690 | 12.14000 | 20.98035 | C  | 22.66724 | 26.57547 | 25.84477 |
| C | 15.99968 | 20.44772 | 22.38833 | C | 16.56887 | 16.70400 | 22.27745 | H  | 17.10175 | 11.91867 | 20.92166 | C  | 22.49901 | 25.57817 | 24.93374 |
| C | 18.95709 | 22.80946 | 22.55696 | C | 15.84234 | 15.50177 | 22.27155 | H  | 15.48400 | 11.18248 | 20.96944 | C  | 23.27475 | 25.93379 | 23.72727 |
| C | 18.28148 | 24.03653 | 22.65617 | C | 16.46137 | 14.25383 | 22.25648 | H  | 25.15303 | 20.96060 | 22.36782 | C  | 23.85770 | 28.75501 | 25.86231 |
| C | 16.89150 | 24.12249 | 22.67457 | C | 17.85820 | 14.22459 | 22.24294 | C  | 26.88170 | 30.12424 | 21.77264 | C  | 23.32976 | 29.02182 | 27.23462 |
| C | 16.16706 | 22.93089 | 22.58217 | C | 18.63694 | 15.38717 | 22.25342 | C  | 27.11276 | 28.39491 | 20.50409 | C  | 22.06615 | 29.62309 | 27.40050 |
| C | 16.78226 | 21.67724 | 22.48357 | C | 14.59694 | 20.47905 | 22.32920 | N  | 26.42962 | 28.85703 | 21.62918 | C  | 21.59255 | 29.85648 | 28.69697 |
| H | 18.86087 | 24.95246 | 22.72844 | C | 13.82635 | 19.32151 | 22.24324 | N  | 25.13482 | 26.50517 | 21.56783 | C  | 22.33744 | 29.51010 | 29.82897 |
| H | 15.08013 | 22.98762 | 22.59706 | C | 14.49809 | 18.09638 | 22.22860 | C  | 25.89744 | 26.31146 | 20.41931 | C  | 23.58658 | 28.90971 | 29.63781 |
| C | 26.76714 | 18.80602 | 22.20926 | C | 15.89360 | 17.99895 | 22.28620 | C  | 25.50185 | 25.10845 | 19.74737 | C  | 24.09800 | 28.65984 | 28.35959 |
| C | 27.32211 | 19.40807 | 23.51737 | H | 14.09149 | 21.44054 | 22.34124 | C  | 24.48243 | 24.56254 | 20.47115 | H  | 21.92118 | 24.66545 | 25.03283 |
| H | 26.99731 | 18.81720 | 24.38638 | H | 13.90646 | 17.18526 | 22.16001 | C  | 24.28064 | 25.41048 | 21.61497 | H  | 22.24804 | 26.66366 | 26.84237 |
| H | 18.42269 | 19.41518 | 23.49642 | H | 14.75684 | 15.54284 | 22.28701 | C  | 26.64997 | 31.12704 | 22.69856 | H  | 26.00253 | 32.73433 | 25.03084 |
| C | 27.32822 | 17.38544 | 22.05352 | H | 18.35301 | 13.25538 | 22.22966 | C  | 26.88104 | 27.16600 | 19.91592 | H  | 24.50645 | 31.32830 | 26.79489 |
| H | 26.96975 | 16.90320 | 21.13189 | H | 23.98496 | 15.12254 | 22.25877 | C  | 23.38882 | 25.12075 | 22.64862 | C  | 21.82178 | 29.79763 | 31.21437 |
| H | 28.42587 | 17.42853 | 22.00239 | H | 24.97095 | 16.70573 | 22.17270 | C  | 27.64747 | 26.78118 | 18.69480 | H  | 22.19287 | 30.76928 | 31.57922 |
| C | 27.24732 | 19.65083 | 21.01068 | H | 26.97923 | 20.44188 | 23.66538 | C  | 28.81302 | 25.99926 | 18.82066 | H  | 20.72386 | 29.83818 | 31.23393 |
| H | 26.85988 | 19.24344 | 20.06540 | C | 12.29512 | 19.34874 | 22.15777 | C  | 29.53214 | 25.66583 | 17.66732 | H  | 22.15164 | 29.03343 | 31.93230 |
| H | 26.91733 | 20.69634 | 21.08759 | C | 11.73313 | 20.77708 | 22.19661 | C  | 29.12386 | 26.08344 | 16.39627 | C  | 21.23384 | 30.00521 | 26.20522 |
| H | 28.34692 | 19.64880 | 20.96249 | H | 11.99502 | 21.29293 | 23.13247 | C  | 27.96483 | 26.86061 | 16.29820 | H  | 20.99997 | 29.12661 | 25.58424 |
| H | 27.06163 | 16.74425 | 22.90674 | H | 12.09701 | 21.38196 | 21.35274 | C  | 27.21707 | 27.21881 | 17.42557 | H  | 20.28859 | 30.46881 | 26.51646 |
| C | 22.39004 | 18.94412 | 22.35738 | H | 10.63580 | 20.74229 | 22.13164 | H  | 25.94440 | 24.75409 | 18.82122 | H  | 21.76918 | 30.71394 | 25.55495 |
| H | 20.61021 | 30.32012 | 28.82388 | C | 11.85156 | 18.68938 | 20.83491 | C  | 29.89495 | 25.68588 | 15.16532 | C  | 25.44517 | 28.00878 | 28.19048 |
| H | 30.44065 | 25.06539 | 17.76787 | H | 12.19152 | 17.64633 | 20.76749 | H  | 30.95946 | 25.53134 | 15.39045 | H  | 25.36790 | 27.07450 | 27.61352 |
| H | 27.63071 | 27.20232 | 15.31450 | H | 10.75345 | 18.69323 | 20.75645 | H  | 29.50852 | 24.74255 | 14.74607 | H  | 26.13762 | 28.66139 | 27.63673 |
| C | 28.01221 | 29.41038 | 19.98837 | C | 11.70275 | 18.56289 | 23.34623 | H  | 29.81585 | 26.44867 | 14.37802 | H  | 25.89502 | 27.77671 | 29.16465 |
| H | 28.64639 | 29.24614 | 19.12261 | H | 12.04095 | 17.51714 | 23.35193 | C  | 29.28355 | 25.53595 | 20.17399 | Ni | 25.17245 | 28.02455 | 22.78749 |
| C | 27.84872 | 30.51937 | 20.78384 | H | 11.99963 | 19.01794 | 24.30250 | H  | 28.54280 | 24.87370 | 20.64851 | H  | 24.18218 | 28.62290 | 30.50910 |
| C | 27.47786 | 32.27993 | 22.26219 | C | 26.22519 | 9.32368  | 19.64181 | C  | 21.96513 | 8.09737  | 28.56729 | C  | 28.94454 | 5.31070  | 19.95588 |
| C | 28.22420 | 31.90855 | 21.08707 | N | 25.73850 | 8.92352  | 20.88629 | C  | 20.70229 | 7.46672  | 28.46361 | H  | 29.88227 | 1.39389  | 20.98697 |
| C | 27.59386 | 33.55027 | 22.80053 | N | 24.34665 | 11.21961 | 20.85655 | C  | 20.12068 | 7.24820  | 27.18542 | H  | 29.03459 | 3.58283  | 24.66503 |
| C | 28.57540 | 35.89264 | 22.82689 | C | 24.92799 | 11.35844 | 19.59848 | C  | 20.88378 | 7.63724  | 26.02945 | C  | 29.60775 | 5.61656  | 18.60453 |
| C | 29.06901 | 35.76350 | 24.28354 | C | 24.53353 | 12.59681 | 18.99307 | H  | 21.32068 | 13.00780 | 24.53346 | C  | 30.65546 | 4.56440  | 18.20531 |
| H | 28.38138 | 35.16149 | 24.89407 | C | 23.72468 | 13.23797 | 19.88471 | H  | 21.26436 | 10.73323 | 26.01541 | H  | 30.21410 | 3.56296  | 18.09466 |
| H | 30.05809 | 35.28380 | 24.31896 | C | 23.61812 | 12.38727 | 21.03890 | H  | 25.62488 | 5.06560  | 24.32607 | C  | 28.52971 | 5.62818  | 17.50001 |
| H | 29.15027 | 36.75841 | 24.74787 | C | 26.36576 | 6.83388  | 22.14495 | H  | 23.61997 | 6.12766  | 25.80396 | H  | 27.71345 | 6.32652  | 17.71669 |
| C | 29.55928 | 36.79147 | 22.06447 | C | 25.85256 | 10.47652 | 18.99360 | C  | 19.97780 | 7.01553  | 29.69377 | H  | 28.97815 | 5.91162  | 16.53525 |
| H | 29.24609 | 36.94655 | 21.02144 | C | 22.84619 | 12.70030 | 22.15800 | H  | 20.33180 | 6.02654  | 30.02766 | C  | 30.33589 | 6.97514  | 18.68246 |
| H | 29.60616 | 37.77793 | 22.54868 | C | 26.40166 | 10.80235 | 17.65659 | H  | 20.12606 | 7.71280  | 30.53066 | H  | 29.67745 | 7.78821  | 19.00814 |
| C | 27.19077 | 36.57405 | 22.81543 | C | 25.75013 | 10.36807 | 16.48569 | H  | 18.89905 | 6.93062  | 29.50284 | H  | 31.17087 | 6.91701  | 19.39631 |
| H | 26.81879 | 36.68369 | 21.78625 | C | 26.32019 | 10.67017 | 15.24332 | C  | 24.01855 | 9.18503  | 27.58842 | H  | 30.74737 | 7.24052  | 17.69634 |
| H | 27.25594 | 37.57566 | 23.26784 | C | 27.51470 | 11.38962 | 15.13470 | H  | 24.00547 | 10.18916 | 27.13719 | H  | 28.08908 | 4.62615  | 17.39088 |
| C | 29.08622 | 32.83433 | 20.48152 | C | 28.14472 | 11.80503 | 16.31293 | H  | 24.29081 | 9.28674  | 28.64707 | C  | 29.30789 | 4.15929  | 20.68909 |
| C | 30.57641 | 36.37253 | 22.06153 | C | 27.60932 | 11.52515 | 17.57470 | H  | 24.81651 | 8.62371  | 27.07862 | C  | 28.75305 | 3.81838  | 21.92361 |
| H | 26.44758 | 35.99569 | 23.38208 | H | 24.84949 | 12.92077 | 18.00594 | C  | 20.28922 | 7.38765  | 24.66872 | H  | 27.32815 | 4.42592  | 23.43654 |
| C | 29.90808 | 32.49750 | 19.22819 | C | 28.09496 | 11.73217 | 13.78792 | H  | 20.16271 | 8.32729  | 24.10933 | H  | 23.22650 | 14.19553 | 19.77678 |
| C | 30.77063 | 33.67703 | 18.74964 | H | 27.78009 | 11.01268 | 13.01946 | H  | 20.94397 | 6.74681  | 24.05828 | H  | 30.06667 | 3.50563  | 20.26851 |
| H | 31.50439 | 33.98627 | 19.50857 | H | 27.76350 | 12.73059 | 13.45891 | H  | 19.30917 | 6.89990  | 24.75113 | H  | 31.47808 | 4.50494  | 18.93318 |
| H | 30.16009 | 34.55079 | 18.47783 | H | 29.19374 | 11.74787 | 13.81672 | Ni | 24.46470 | 9.69771  | 22.06820 | H  | 24.09939 | 9.32458  | 15.56676 |
| C | 30.86741 | 31.33051 | 19.54408 | C | 24.46518 | 9.58737  | 16.56785 | H  | 22.38900 | 8.28581  | 29.55777 | H  | 19.22204 | 6.76339  | 27.08145 |
| C | 30.34533 | 30.45185 | 19.93948 | H | 23.68049 | 10.16323 | 17.08225 | H  | 25.81577 | 10.32905 | 14.33494 | H  | 31.32969 | 33.37077 | 17.85314 |
| H | 31.40974 | 31.02857 | 18.63472 | H | 24.59825 | 8.65794  | 17.14260 | H  | 29.08368 | 12.36238 | 16.25053 | H  | 31.09084 | 4.84423  | 17.23466 |
| C | 28.95370 | 32.13370 | 18.07107 | C | 28.31664 | 11.98220 | 18.82298 | C  | 27.20958 | 8.38339  | 19.14032 | C  | 16.14689 | 25.45772 | 22.79305 |
| H | 28.26840 | 31.31912 | 18.33110 | H | 27.66256 | 12.61384 | 19.44340 | H  |          |          |          |    |          |          |          |

|   |          |          |          |
|---|----------|----------|----------|
| C | 22.87851 | 8.69818  | 24.93628 |
| C | 22.13742 | 8.26641  | 26.16001 |
| C | 22.68543 | 8.50133  | 27.43772 |
| C | 30.24857 | 1.75059  | 21.96099 |
| H | 31.16822 | 2.33036  | 21.79347 |
| H | 30.51570 | 0.86815  | 22.56073 |
| C | 29.76907 | 3.00293  | 24.06491 |
| H | 30.64690 | 3.65031  | 23.92391 |
| H | 30.08033 | 2.11949  | 24.64345 |
| H | 17.75280 | 26.58630 | 23.77768 |
| H | 14.52792 | 24.62421 | 24.02972 |
| C | 29.18412 | 2.57077  | 22.70356 |
| C | 27.95689 | 1.66552  | 22.93928 |
| H | 27.16971 | 2.18507  | 23.50341 |
| H | 27.52482 | 1.33742  | 21.98260 |
| H | 28.24812 | 0.77155  | 23.51195 |
| H | 16.52416 | 27.58359 | 22.97252 |
| C | 15.25331 | 25.65282 | 21.55048 |
| H | 15.86006 | 25.67876 | 20.63357 |
| H | 14.51925 | 24.84147 | 21.44574 |
| H | 14.70016 | 26.60161 | 21.62540 |

# ortho-phenyl-fused porphyrin-HBC o-Ph

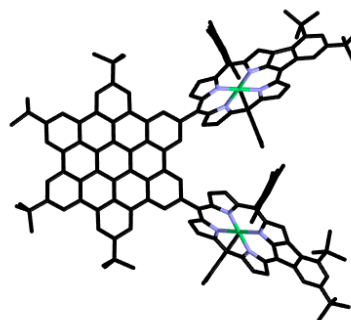

## Cartesian Coordinates (Angstroms)

|    | X        | Y        | Z        |   | X        | Y        | Z        |   | X        | Y        | Z        |   |          |          |          |
|----|----------|----------|----------|---|----------|----------|----------|---|----------|----------|----------|---|----------|----------|----------|
| C  | 25.17552 | 18.85680 | 22.27594 | C | 23.01427 | 17.71417 | 22.25578 | H | 10.56718 | 18.58375 | 23.36712 | C | 27.63051 | 26.76714 | 18.67364 |
| C  | 24.51489 | 20.08501 | 22.31465 | C | 20.90589 | 19.03243 | 22.33564 | H | 12.20080 | 19.19107 | 20.02399 | C | 28.78257 | 25.96771 | 18.81715 |
| C  | 24.41516 | 17.68670 | 22.25609 | C | 20.24638 | 20.29260 | 22.39282 | C | 15.64605 | 12.95044 | 22.37715 | C | 29.50203 | 25.60710 | 17.67242 |
| C  | 22.53518 | 23.89758 | 22.53365 | C | 18.06303 | 19.15014 | 22.37110 | C | 16.05524 | 12.16739 | 23.64241 | C | 29.10676 | 26.01300 | 16.39340 |
| C  | 23.11657 | 20.16897 | 22.35223 | C | 18.72225 | 17.89082 | 22.31567 | H | 15.82880 | 12.74560 | 24.55017 | C | 27.96039 | 26.80641 | 16.27780 |
| C  | 21.01578 | 21.50882 | 22.43765 | C | 20.14348 | 17.83188 | 22.29881 | C | 14.12734 | 13.17194 | 22.41718 | C | 27.21258 | 27.19218 | 17.39627 |
| C  | 22.44017 | 21.45923 | 22.42333 | C | 20.80917 | 16.55604 | 22.23332 | H | 13.76947 | 13.70621 | 21.52444 | H | 25.89576 | 24.77357 | 18.77493 |
| C  | 23.16722 | 22.65410 | 22.48959 | C | 17.95088 | 16.67479 | 22.29050 | H | 13.61509 | 12.19923 | 22.45076 | C | 29.87684 | 25.58168 | 15.17313 |
| C  | 21.14054 | 23.94219 | 22.53545 | C | 16.62424 | 19.20973 | 22.37368 | H | 15.69242 | 12.64430 | 20.20888 | H | 30.94180 | 25.43490 | 15.40165 |
| C  | 20.36324 | 22.77505 | 22.50650 | C | 20.05912 | 15.34856 | 22.19353 | H | 13.82123 | 13.74016 | 23.30810 | H | 29.49171 | 24.62534 | 14.78309 |
| H  | 24.25470 | 22.63847 | 22.51825 | C | 20.73699 | 14.12265 | 22.09186 | H | 20.15814 | 13.20482 | 22.04213 | H | 29.79564 | 26.32081 | 14.36379 |
| H  | 20.66603 | 24.92131 | 22.56025 | C | 22.12661 | 14.03724 | 22.04019 | H | 17.13041 | 11.93906 | 23.64798 | C | 29.23635 | 25.51176 | 20.17868 |
| C  | 18.82478 | 20.35090 | 22.41081 | C | 22.85003 | 15.23113 | 22.10009 | H | 15.50682 | 11.21420 | 23.69364 | H | 28.47359 | 24.88363 | 20.66413 |
| C  | 18.15679 | 21.62399 | 22.48461 | C | 22.23180 | 16.48294 | 22.19897 | C | 15.98007 | 12.11090 | 21.12666 | H | 30.16516 | 24.93082 | 20.11084 |
| C  | 15.95207 | 20.46277 | 22.41616 | C | 16.52940 | 16.71907 | 22.31430 | H | 17.05405 | 11.88643 | 21.06300 | H | 29.41010 | 26.36697 | 20.84945 |
| C  | 18.90574 | 22.83156 | 22.54841 | C | 15.80562 | 15.51561 | 22.33691 | H | 15.43643 | 11.15413 | 21.15533 | C | 25.98214 | 28.04475 | 17.23226 |
| C  | 18.22894 | 24.05658 | 22.66434 | C | 16.42784 | 14.26903 | 22.32732 | C | 22.87322 | 12.70315 | 21.91801 | H | 25.10199 | 27.56806 | 17.68997 |
| C  | 16.83932 | 24.13863 | 22.71303 | C | 17.82389 | 14.24266 | 22.27793 | C | 21.91778 | 11.50240 | 21.86692 | H | 26.10159 | 29.02122 | 17.72682 |
| C  | 16.11647 | 22.94519 | 22.62865 | C | 18.60110 | 15.40664 | 22.25192 | H | 21.30533 | 11.43037 | 22.77809 | H | 25.76599 | 28.22266 | 16.17077 |
| C  | 16.73293 | 21.69391 | 22.50794 | C | 14.54892 | 20.49090 | 22.36250 | H | 21.24419 | 11.55250 | 20.99840 | C | 25.87152 | 30.84391 | 23.80229 |
| H  | 18.80719 | 24.97382 | 22.72944 | C | 13.78097 | 19.33088 | 22.28515 | H | 22.49957 | 10.57287 | 21.78338 | C | 25.66397 | 31.69233 | 24.94220 |
| H  | 15.02988 | 22.99728 | 22.66963 | C | 14.45528 | 18.10703 | 22.27532 | C | 23.71562 | 12.71003 | 20.62513 | C | 24.91249 | 30.98626 | 25.83210 |
| C  | 16.09394 | 25.47071 | 22.86085 | C | 15.85126 | 18.01276 | 22.32251 | H | 24.45382 | 13.52428 | 20.62567 | C | 26.63957 | 29.70695 | 25.23044 |
| C  | 15.26146 | 25.44224 | 24.15974 | H | 14.04143 | 21.45142 | 22.36844 | H | 24.26202 | 11.75999 | 20.52215 | N | 25.22814 | 29.61262 | 23.97977 |
| H  | 15.91068 | 25.30245 | 25.03647 | H | 13.86518 | 17.19431 | 22.21541 | C | 23.80614 | 12.52881 | 23.13472 | N | 23.89943 | 27.15177 | 23.94370 |
| H  | 14.71538 | 26.39018 | 24.28201 | H | 14.72071 | 15.55477 | 22.37589 | H | 24.54099 | 13.34305 | 23.20401 | C | 23.51893 | 27.54758 | 25.21884 |
| C  | 17.04828 | 26.67179 | 22.92610 | H | 18.32097 | 13.27429 | 22.27216 | H | 23.22950 | 12.51371 | 24.07118 | C | 22.64328 | 26.57389 | 25.81409 |
| H  | 17.65203 | 26.76423 | 22.01117 | H | 23.93637 | 15.17855 | 22.05801 | H | 24.36031 | 11.58103 | 23.05554 | C | 22.46214 | 25.58764 | 24.89356 |
| H  | 16.46460 | 27.59772 | 23.03361 | H | 24.94794 | 16.73801 | 22.24807 | H | 23.07415 | 12.83669 | 19.74076 | C | 23.23791 | 25.94728 | 23.73375 |
| C  | 15.15411 | 25.66544 | 21.65289 | H | 14.52476 | 24.62656 | 24.15252 | H | 25.12384 | 20.98687 | 22.31278 | C | 23.86201 | 28.73757 | 25.85158 |
| H  | 15.72597 | 25.69342 | 20.71382 | C | 12.24926 | 19.35258 | 22.20746 | C | 26.87709 | 30.11882 | 21.75505 | C | 23.33298 | 28.99967 | 27.22437 |
| H  | 14.41694 | 24.85385 | 21.57552 | C | 11.68252 | 20.77931 | 22.22051 | C | 27.09635 | 28.39497 | 20.47665 | C | 22.07265 | 29.60807 | 27.38821 |
| H  | 14.60328 | 26.61355 | 21.74910 | H | 11.94865 | 21.31635 | 23.14309 | N | 26.41578 | 28.85621 | 21.60376 | C | 21.59344 | 29.83464 | 28.68406 |
| H  | 17.73052 | 26.60719 | 23.78672 | H | 12.03824 | 21.36725 | 21.36138 | N | 25.09950 | 26.51886 | 21.52938 | C | 22.32912 | 29.47380 | 29.81718 |
| C  | 22.34497 | 18.97149 | 22.31492 | H | 10.58491 | 20.73843 | 22.16398 | C | 25.86302 | 26.32299 | 20.38213 | C | 23.57613 | 28.86735 | 29.62810 |
| H  | 22.23992 | 30.67739 | 31.61019 | H | 11.79751 | 18.66536 | 20.90184 | C | 25.45467 | 25.12902 | 19.70128 | C | 24.09314 | 28.62482 | 28.35079 |
| H  | 20.71364 | 29.87039 | 31.20168 | H | 12.13631 | 17.62088 | 20.85437 | C | 24.42654 | 24.59161 | 20.41842 | H | 21.87588 | 24.67962 | 24.98619 |
| H  | 22.06277 | 28.93823 | 31.89802 | H | 10.69892 | 18.66803 | 20.83164 | C | 24.23300 | 25.43379 | 21.56801 | H | 22.22797 | 26.65619 | 26.81390 |
| C  | 21.24851 | 30.00267 | 26.19135 | C | 11.66700 | 18.58875 | 23.41506 | C | 26.66007 | 31.11235 | 22.69419 | H | 26.06353 | 32.69364 | 25.05728 |
| H  | 20.99737 | 29.12629 | 25.57386 | H | 12.00829 | 17.54423 | 23.43760 | C | 26.85825 | 27.16830 | 19.88576 | H | 24.55955 | 31.28687 | 26.81394 |
| H  | 20.31215 | 30.48556 | 26.50005 | H | 11.96937 | 19.06232 | 24.36056 | C | 23.34090 | 25.14472 | 22.60116 | C | 21.80584 | 29.74999 | 31.20229 |
| H  | 21.79795 | 30.69777 | 25.53835 | H | 30.34325 | 30.43852 | 19.92197 | C | 32.90848 | 19.61889 | 23.14698 | C | 34.90021 | 18.09798 | 20.35146 |
| C  | 25.43797 | 27.96814 | 28.18334 | H | 31.41314 | 31.02039 | 18.62410 | C | 33.57648 | 20.27833 | 24.23365 | C | 36.07520 | 19.39239 | 22.07512 |
| H  | 25.36022 | 27.04124 | 27.59469 | C | 28.96527 | 32.14815 | 18.07150 | C | 32.62153 | 20.60728 | 25.14686 | C | 38.59819 | 19.66908 | 22.04787 |
| H  | 26.13769 | 28.62385 | 27.64252 | H | 28.27472 | 31.33542 | 18.32357 | C | 31.36017 | 20.16053 | 24.61542 | C | 38.76705 | 19.11438 | 23.47829 |
| H  | 25.87985 | 27.72224 | 29.15784 | H | 28.36118 | 33.02748 | 17.80320 | N | 31.52824 | 19.55677 | 23.37969 | H | 37.92328 | 19.39312 | 24.12512 |
| Ni | 25.15516 | 28.02670 | 22.76119 | H | 29.54151 | 31.84576 | 17.18348 | N | 28.73422 | 19.40702 | 23.48724 | H | 38.83354 | 18.01662 | 23.64580 |
| H  | 24.16506 | 28.56991 | 30.50044 | H | 31.61504 | 31.61583 | 20.29083 | C | 28.93842 | 19.97026 | 24.73984 | H | 39.68744 | 19.51136 | 23.93366 |
| H  | 20.61368 | 30.30425 | 28.80912 | C | 29.20525 | 34.09492 | 21.09790 | C | 27.68501 | 20.19616 | 25.40844 | C | 39.84098 | 19.28271 | 21.23379 |
| H  | 30.39870 | 24.99144 | 17.78609 | C | 28.49207 | 34.46888 | 22.23787 | C | 26.70304 | 19.79747 | 24.55514 | H | 39.79368 | 19.67406 | 20.20680 |
| H  | 27.63457 | 27.13638 | 15.28728 | H | 27.04500 | 33.79870 | 23.70106 | C | 27.35235 | 19.31734 | 23.36171 | H | 40.73740 | 19.70486 | 21.71123 |
| C  | 28.00244 | 29.40781 | 19.96674 | H | 23.84696 | 23.70195 | 20.19789 | C | 30.16027 | 20.33676 | 25.29258 | C | 38.51798 | 21.20917 | 22.10510 |
| H  | 28.63689 | 29.24307 | 19.10134 | H | 29.87654 | 34.82215 | 20.65020 | C | 30.17633 | 20.97262 | 26.64482 | H | 38.40392 | 21.63186 | 21.09618 |
| C  | 27.84648 | 30.51409 | 20.76830 | C | 32.70932 | 18.36550 | 21.11765 | C | 30.01818 | 22.36725 | 26.76714 | H | 39.43658 | 21.62117 | 22.55055 |
| C  | 27.49514 | 32.26224 | 22.26656 | C | 31.27596 | 17.35941 | 19.85900 | C | 30.03105 | 22.94005 | 28.04487 | C | 36.11163 | 17.81481 | 19.70361 |
| C  | 28.23494 | 31.89762 | 21.08518 | N | 31.37888 | 18.14278 | 21.00906 | C | 30.19459 | 22.16786 | 29.19899 | H | 39.97227 | 18.19170 | 21.18295 |
| C  | 27.62184 | 33.52521 | 22.81912 | N | 28.69237 | 18.06135 | 21.06401 | C | 30.34427 | 20.78419 | 29.05102 | H | 37.66736 | 21.55076 | 22.71149 |
| C  | 28.62563 | 35.85598 | 22.87744 | C | 28.86247 | 17.34376 | 19.88286 | C | 30.33983 | 20.17151 | 27.79351 | C | 36.18314 | 16.97281 | 18.42072 |
| C  | 29.13852 | 35.69932 | 24.32481 | C | 27.59583 | 17.06944 | 19.27002 | H | 25.62985 | 19.80609 | 24.71238 | C | 37.61988 | 16.80739 | 17.98824 |
| H  | 28.45656 | 35.08950 | 24.93402 | C | 26.63828 | 17.62874 | 20.06426 | H | 27.59158 | 20.61252 | 26.40672 | H | 38.26621 | 16.29205 | 18.62401 |
| H  | 30.12627 | 35.21580 | 24.33862 | C | 27.31719 | 18.21407 | 21.18855 | C | 34.64422 | 20.45494 | 24.29669 | C | 35.63675 | 15.55792 | 18.70559 |
| H  | 29.22996 | 36.68585 | 24.80489 | C | 33.49680 | 19.04418 | 22.03149 | H | 32.73788 | 21.10995 | 26.10218 | H | 34.62518 | 15.57458 | 19.12667 |
| C  | 29.60353 | 36.76298 | 22.11747 | C | 30.07446 | 16.95717 | 19.30742 | C | 30.23088 | 22.80610 | 30.56278 | H | 35.61323 | 14.96648 | 17.77725 |
| H  | 29.27705 | 36.93679 | 21.08148 | C | 26.66088 | 18.80401 | 22.26876 | H | 31.26766 | 22.91321 | 30.92116 | C | 35.37148 | 17.66630 | 17.30613 |
| H  | 29.66117 | 37.74061 | 22.61817 | C | 30.07592 | 16.14021 | 18.05850 | H | 29.78141 | 23.80849 | 30.54822 | H | 34.33349 | 17.85949 | 17.59964 |
| C  | 27.24516 | 36.54554 | 22.89863 | C | 30.04489 | 14.73398 | 18.14525 | H | 29.69325 | 22.19814 | 31.30490 | H | 35.83039 | 18.63243 | 17.04898 |
| H  | 26.85925 | 36.67827 | 21.87735 | C | 30.06736 | 13.98253 | 16.96503 | C | 29.831   |          |          |   |          |          |          |

|    |          |          |          |
|----|----------|----------|----------|
| H  | 29.30051 | 18.73341 | 17.20640 |
| H  | 31.06378 | 18.68943 | 17.17890 |
| H  | 30.15598 | 18.59919 | 15.64858 |
| H  | 30.04992 | 12.89120 | 17.03459 |
| H  | 30.18838 | 16.47933 | 14.67070 |
| C  | 32.58405 | 17.09828 | 19.28784 |
| H  | 32.72313 | 16.50021 | 18.39262 |
| C  | 33.49630 | 17.75242 | 20.08125 |
| C  | 34.89376 | 18.89621 | 21.55097 |
| H  | 31.34941 | 33.37035 | 17.86508 |
| H  | 37.59912 | 16.19905 | 16.98193 |
| C  | 30.10740 | 13.75895 | 14.44775 |
| H  | 30.58201 | 12.78073 | 14.60846 |
| H  | 29.07589 | 13.56998 | 14.10816 |
| H  | 30.63321 | 14.26703 | 13.62725 |
| C  | 29.99650 | 14.04947 | 19.48554 |
| H  | 29.64746 | 18.22660 | 27.14330 |
| H  | 31.39997 | 18.42053 | 27.09050 |
| H  | 30.58354 | 18.20999 | 28.66002 |
| Ni | 30.07368 | 18.79078 | 22.23439 |
| H  | 29.90595 | 24.02239 | 28.13823 |
| H  | 25.56488 | 17.64910 | 19.91092 |
| H  | 38.23541 | 18.12783 | 19.79315 |
| H  | 38.08064 | 17.77365 | 17.64504 |
| H  | 29.98548 | 12.95781 | 19.37028 |
| H  | 30.46531 | 20.15965 | 29.94075 |

# tri-phenyl-fused porphyrin-HBC tri-Ph

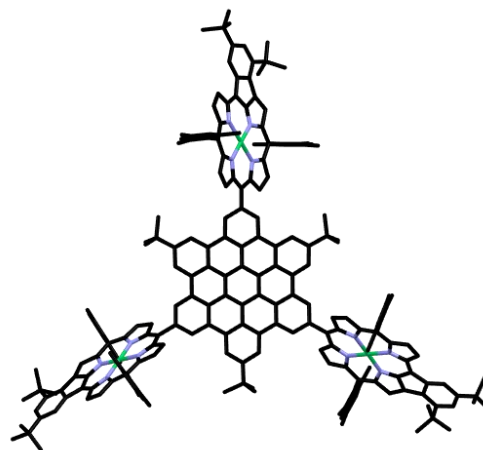

## Cartesian Coordinates (Angstroms)

|   | X        | Y        | Z        |   | X        | Y        | Z         |    | X        | Y        | Z          |    | X        | Y        | Z        |
|---|----------|----------|----------|---|----------|----------|-----------|----|----------|----------|------------|----|----------|----------|----------|
| C | 25.20011 | 18.84671 | 22.27934 | C | 23.03206 | 17.69743 | 22.26390  | H  | 8.94685  | 25.18685 | 19.38499   | H  | 28.24781 | 17.99779 | 20.85627 |
| C | 24.52341 | 20.06222 | 22.34989 | C | 20.91368 | 19.00046 | 22.34765  | H  | 1.41259  | 21.86120 | 16.90906   | H  | 26.93453 | 18.33770 | 24.37562 |
| C | 24.43137 | 17.68037 | 22.23872 | C | 20.24850 | 20.25802 | 22.40264  | N  | 7.60272  | 19.99157 | 21.02133   | C  | 15.67501 | 12.89779 | 22.21736 |
| C | 22.52495 | 23.87224 | 22.53740 | C | 18.06952 | 19.10636 | 22.36515  | C  | 10.12667 | 20.81578 | 19.92726   | C  | 16.05710 | 12.06764 | 23.46080 |
| C | 23.12141 | 20.14285 | 22.37889 | C | 18.73500 | 17.84954 | 22.31553  | C  | 8.91811  | 21.18507 | 19.33323   | H  | 15.80227 | 12.60736 | 24.38459 |
| C | 21.01454 | 21.47670 | 22.44959 | C | 20.15724 | 17.79639 | 22.30539  | C  | 8.88529  | 19.85805 | 16.72806   | C  | 14.15510 | 13.11420 | 22.22854 |
| C | 22.43986 | 21.43093 | 22.44508 | C | 20.83141 | 16.52341 | 22.25331  | H  | 9.74854  | 19.41597 | 17.24853   | H  | 13.81629 | 13.68020 | 21.34808 |
| C | 23.16062 | 22.63047 | 22.50464 | C | 17.96857 | 16.63090 | 22.27975  | H  | 8.91010  | 19.53312 | 15.67981   | H  | 13.64596 | 12.13957 | 22.21295 |
| C | 21.13016 | 23.91206 | 22.53141 | C | 16.62962 | 19.15947 | 22.36331  | C  | 6.32299  | 17.60802 | 25.19331   | H  | 15.77783 | 12.68108 | 20.04042 |
| C | 20.35756 | 22.74167 | 22.50401 | C | 20.08154 | 15.31108 | 22.22900  | C  | 7.59239  | 18.01439 | 24.64859   | H  | 13.82440 | 13.64746 | 23.13230 |
| H | 24.24803 | 22.62029 | 22.53358 | C | 20.76287 | 14.08727 | 22.18724  | N  | 7.43388  | 18.60101 | 23.40354   | H  | 20.21249 | 13.14866 | 22.18864 |
| H | 20.65184 | 24.88946 | 22.54687 | C | 22.15621 | 14.02122 | 22.15261  | H  | 6.19857  | 17.13082 | 26.16070   | H  | 17.13291 | 11.84418 | 23.48666 |
| C | 18.82665 | 20.31073 | 22.41074 | C | 22.88427 | 15.21102 | 22.17081  | H  | 7.72117  | 19.78245 | 27.11443   | H  | 15.51392 | 11.11033 | 23.45970 |
| C | 18.15506 | 21.58275 | 22.47494 | C | 22.25553 | 16.46192 | 22.22759  | Ni | 8.89937  | 19.34717 | 22.25669   | C  | 16.04461 | 12.11095 | 20.94234 |
| C | 15.95472 | 20.41454 | 22.41635 | C | 16.54698 | 16.66861 | 22.28020  | N  | 10.28858 | 20.08375 | 21.10076   | H  | 17.12055 | 11.89104 | 20.89623 |
| C | 18.89936 | 22.79372 | 22.53092 | C | 15.82601 | 15.46307 | 22.26337  | C  | 11.39904 | 21.11724 | 19.33897   | H  | 15.50343 | 11.15281 | 20.91766 |
| C | 18.21612 | 24.01773 | 22.62242 | C | 16.45228 | 14.21929 | 22.23595  | C  | 12.35199 | 20.55730 | 20.13819   | H  | 25.10417 | 20.97969 | 22.37893 |
| C | 16.82551 | 24.09601 | 22.65337 | C | 17.84955 | 14.19874 | 22.22456  | C  | 11.66365 | 19.94045 | 21.23938   | C  | 26.86209 | 30.10218 | 21.74859 |
| C | 16.10808 | 22.89861 | 22.58256 | C | 18.62232 | 15.36513 | 22.24686  | H  | 11.52658 | 21.67189 | 18.41419   | C  | 27.06459 | 28.38523 | 20.45889 |
| C | 16.73163 | 21.64899 | 22.49237 | C | 14.55379 | 20.43748 | 22.39582  | N  | 10.23107 | 18.70950 | 23.50766   | N  | 26.39511 | 28.84179 | 21.59442 |
| H | 18.79040 | 24.93822 | 22.67805 | C | 13.79934 | 19.26595 | 22.32063  | C  | 10.02010 | 18.13127 | 24.75215   | N  | 25.07727 | 26.50268 | 21.52071 |
| H | 15.02101 | 22.94776 | 22.60593 | C | 14.46442 | 18.04073 | 22.27755  | C  | 11.61442 | 18.77594 | 23.37945   | C  | 25.83442 | 26.31031 | 20.36840 |
| C | 16.07131 | 25.42641 | 22.76677 | C | 15.86389 | 17.95765 | 22.30661  | C  | 8.79205  | 17.80283 | 25.31525   | C  | 25.42965 | 25.11261 | 19.69205 |
| C | 15.22236 | 25.41791 | 24.05559 | H | 14.01559 | 21.38198 | 22.44369  | C  | 8.76805  | 17.16670 | 26.66714   | C  | 24.40995 | 24.56895 | 20.41703 |
| H | 15.86093 | 25.30226 | 24.94362 | H | 13.85840 | 17.13919 | 22.21326  | C  | 8.84659  | 15.76505 | 26.78589   | C  | 24.21708 | 25.41264 | 21.56535 |
| H | 14.66718 | 26.36365 | 24.15066 | H | 14.74041 | 15.49828 | 22.27640  | C  | 8.66566  | 17.36069 | 29.07644   | C  | 26.65207 | 31.09425 | 22.69087 |
| C | 17.02037 | 26.63213 | 22.82102 | H | 18.34954 | 13.23244 | 22.19880  | C  | 8.67763  | 17.97400 | 27.81906   | C  | 26.82114 | 27.16131 | 19.86500 |
| H | 17.63948 | 26.70579 | 21.91456 | H | 23.96955 | 15.13864 | 22.13843  | C  | 8.60071  | 19.47304 | 27.69973   | C  | 23.32679 | 25.12294 | 22.60001 |
| H | 16.43249 | 27.55833 | 22.89817 | H | 24.94873 | 16.72441 | 22.18354  | H  | 9.48132  | 19.87800 | 27.17775   | C  | 27.58024 | 26.77296 | 18.64050 |
| C | 15.14426 | 25.59228 | 21.54429 | H | 14.91655 | 24.59688 | 24.05631  | H  | 8.53947  | 19.94386 | 28.68957   | C  | 28.75381 | 26.00278 | 18.76370 |
| H | 15.72626 | 25.60519 | 20.61110 | C | 26.72989 | 18.75033 | 22.23411  | H  | 8.60076  | 17.98979 | 29.96873   | C  | 29.46099 | 25.65728 | 17.60654 |
| H | 14.41164 | 24.77590 | 21.47387 | C | 27.40463 | 20.12651 | 22.32677  | C  | 8.83037  | 15.19181 | 28.06306   | C  | 29.03356 | 26.05261 | 16.33473 |
| H | 14.58742 | 26.53903 | 21.61679 | H | 27.12280 | 20.77863 | 22.148657 | C  | 8.73876  | 15.97065 | 29.22093   | C  | 27.86787 | 26.82035 | 16.23954 |
| H | 17.68786 | 26.58852 | 23.69459 | H | 27.15294 | 20.64197 | 23.26564  | C  | 8.69556  | 15.33258 | 30.58445   | C  | 27.13114 | 27.18912 | 17.37077 |
| C | 22.35273 | 18.94793 | 22.33205 | H | 28.49694 | 20.00179 | 22.29769  | H  | 7.65743  | 15.23320 | 30.94125   | H  | 25.86708 | 24.76011 | 18.76274 |
| C | 30.17829 | 24.99304 | 20.03209 | C | 27.22321 | 17.88764 | 23.41444  | H  | 9.13613  | 14.32618 | 30.57075   | C  | 29.79122 | 25.64052 | 15.10029 |
| H | 29.42543 | 26.42677 | 20.77677 | H | 26.80760 | 16.87074 | 23.37979  | C  | 8.95190  | 14.89461 | 25.56177   | H  | 30.85828 | 25.48977 | 15.31545 |
| C | 25.88172 | 28.01769 | 17.22983 | H | 28.32039 | 17.80337 | 23.38852  | H  | 9.85575  | 15.13222 | 24.97960   | H  | 29.40094 | 24.69158 | 14.69763 |
| H | 25.01604 | 27.51692 | 17.68953 | C | 27.15199 | 18.08973 | 20.90494  | H  | 8.98826  | 13.83244 | 25.83697   | H  | 29.70227 | 26.39300 | 14.30415 |
| H | 25.98639 | 28.98952 | 17.73667 | H | 26.72327 | 17.08348 | 20.79794  | H  | 8.09603  | 15.04819 | 24.88678   | C  | 29.24441 | 25.56370 | 20.11797 |
| H | 25.65179 | 28.20511 | 16.17295 | H | 26.81791 | 18.69145 | 20.04718  | H  | 8.89510  | 14.10382 | 28.15312   | H  | 28.49949 | 24.93291 | 20.62726 |
| C | 25.86063 | 30.82786 | 23.79701 | H | 20.57091 | 30.33709 | 28.76142  | C  | 11.27143 | 17.85901 | 25.40733   | C  | 28.19724 | 11.73710 | 28.81569 |
| C | 25.65133 | 31.67730 | 24.93587 | H | 30.37453 | 25.06399 | 17.70439  | H  | 11.35981 | 17.42089 | 26.39674   | C  | 27.58945 | 11.23340 | 28.97002 |
| C | 24.89060 | 30.97578 | 25.82115 | H | 27.51903 | 27.14495 | 15.25515  | C  | 12.31243 | 19.31759 | 22.30501   | C  | 26.44313 | 10.44481 | 28.82111 |
| C | 24.61454 | 29.69799 | 25.21746 | C | 27.96867 | 29.39827 | 19.94569  | C  | 12.25838 | 18.25224 | 24.55704   | C  | 25.90519 | 10.15399 | 27.56268 |
| N | 25.21015 | 29.59961 | 23.97065 | H | 28.59312 | 29.23760 | 19.07211  | H  | 13.33211 | 18.21557 | 24.70729   | H  | 23.27273 | 14.08266 | 24.55718 |
| N | 23.87757 | 27.13849 | 23.93405 | C | 27.82451 | 30.49960 | 20.75585  | H  | 9.32710  | 15.93564 | 31.32725   | H  | 24.97468 | 12.75919 | 26.20722 |
| C | 23.48886 | 27.54108 | 25.20463 | C | 27.48848 | 32.24312 | 22.26264  | H  | 13.42822 | 20.55455 | 20.00271   | H  | 28.24615 | 6.54354  | 24.00911 |
| C | 22.61116 | 26.56954 | 25.80038 | C | 28.21937 | 31.88058 | 21.07519  | C  | 23.91594 | 8.05368  | 19.58609   | H  | 27.87647 | 8.48958  | 25.85460 |
| C | 22.43770 | 25.57722 | 24.88525 | C | 27.62312 | 33.50363 | 22.81888  | N  | 24.64809 | 8.32926  | 20.74143   | C  | 28.16346 | 11.51222 | 30.33413 |
| C | 23.21899 | 25.93137 | 23.72762 | C | 28.63129 | 35.83281 | 22.87586  | N  | 23.22468 | 10.60620 | 20.85995   | H  | 28.80422 | 10.68078 | 30.67029 |
| C | 23.82871 | 28.73317 | 25.83488 | C | 29.14934 | 35.67152 | 24.32084  | C  | 22.67799 | 10.12346 | 19.67376   | H  | 28.77977 | 12.42186 | 30.33165 |
| C | 23.29052 | 29.00290 | 27.20255 | H | 28.46789 | 35.06273 | 24.93161  | C  | 21.78752 | 11.08776 | 19.09710   | H  | 27.37041 | 11.63512 | 31.08557 |
| C | 22.03408 | 29.62206 | 27.35403 | H | 30.13510 | 35.18387 | 24.32905  | C  | 21.79059 | 12.17639 | 19.91884   | C  | 28.36904 | 12.03621 | 25.31741 |
| C | 21.54763 | 29.85899 | 28.64530 | H | 29.24671 | 36.65653 | 24.80293  | C  | 22.65873 | 11.86467 | 21.02164   | H  | 27.68586 | 12.68179 | 24.74412 |
| C | 22.27276 | 29.49853 | 29.78528 | C | 29.60879 | 36.73870 | 22.11372  | C  | 26.48427 | 6.91629  | 21.73104   | H  | 29.25041 | 12.62851 | 25.59602 |
| C | 23.51631 | 28.88150 | 29.60834 | H | 29.27997 | 36.91367 | 21.07868  | C  | 22.95695 | 8.89936  | 19.06275   | H  | 28.69170 | 11.23665 | 24.63296 |
| C | 24.03995 | 28.62782 | 28.33608 | H | 29.66981 | 37.71622 | 22.61440  | C  | 22.85912 | 12.71142 | 22.11142   | C  | 24.66622 | 9.30721  | 27.43888 |
| H | 21.85259 | 24.66867 | 24.97937 | C | 27.25238 | 36.52530 | 22.90258  | C  | 22.24647 | 8.51743  | 17.80740   | H  | 23.85815 | 9.85389  | 26.92885 |
| H | 22.18979 | 26.65711 | 26.79717 | H | 26.86394 | 36.65990 | 21.88250  | C  | 21.01375 | 7.83902  | 17.88221   | H  | 24.85814 | 8.40350  | 26.84023 |
| H | 26.05519 | 32.67652 | 25.05335 | H | 27.33378 | 37.51635 | 23.37510  | C  | 20.36860 | 7.47559  | 16.69472   | H  | 24.30209 | 8.99578  | 28.42661 |
| H | 24.53400 | 31.27790 | 26.80132 | C | 29.08702 | 32.80598 | 20.47679  | C  | 20.91213 | 7.76889  | 15.43971   | Ni | 24.56020 | 9.75485  | 21.99924 |
| C | 21.74317 | 29.78589 | 31.16544 | H | 30.62305 | 36.31368 | 22.08753  | C  | 22.13938 | 8.43882  | 15.39243   | H  | 29.09060 | 12.36082 | 27.90993 |
| H | 22.19018 | 30.70594 | 31.57587 | H | 26.51373 | 35.94151 | 23.46957  | C  | 22.81863 | 8.81982  | 16.55504   | H  | 19.41440 | 6.94464  | 16.75460 |
| H | 20.65339 | 29.92495 | 31.15591 | C | 29.89744 | 32.47856 | 19.21354  | H  | 21.25091 | 10.94014 | 18.16471   | H  | 22.58530 | 8.67234  | 14.42149 |
| H | 21.98046 | 28.97071 | 31.86408 | H | -0.79444 | 18.41410 | 20.15282  | H  | 0.59796  | 16.47857 | 21.08908   | H  | -0.99666 | 19.90836 | 21.10572 |
| C | 21.22200 | 30.01871 | 26.14954 | H | -1.75685 | 18.39701 | 21.64540  | H  | -0.45474 | 16.50408 | 22.52893</ |    |          |          |          |

|    |          |          |          |   |          |          |          |
|----|----------|----------|----------|---|----------|----------|----------|
| H  | 20.28652 | 30.50834 | 26.45021 | C | 1.38631  | 21.26482 | 17.83300 |
| H  | 21.78094 | 30.70913 | 25.49951 | H | 0.73089  | 21.78647 | 18.54604 |
| C  | 25.38047 | 27.95966 | 28.18130 | C | 3.35595  | 22.53408 | 18.64321 |
| H  | 25.29807 | 27.02797 | 27.60082 | H | 4.36472  | 22.52730 | 19.07127 |
| H  | 26.08767 | 28.60489 | 27.63766 | H | 3.38246  | 23.11492 | 17.70828 |
| H  | 25.81570 | 27.71945 | 29.16013 | C | 3.64491  | 20.40909 | 17.27374 |
| Ni | 25.13505 | 28.01118 | 22.75251 | C | 20.18418 | 7.39827  | 14.17470 |
| H  | 24.09719 | 28.58494 | 30.48634 | H | 19.55033 | 6.51253  | 14.32059 |
| C  | 26.72324 | 4.09648  | 19.33233 | H | 19.52813 | 8.21955  | 13.84312 |
| H  | 28.95785 | 0.89703  | 20.74774 | H | 20.88507 | 7.18995  | 13.35420 |
| H  | 30.74488 | 4.53248  | 22.33649 | C | 20.40359 | 7.50132  | 19.21687 |
| C  | 26.02639 | 3.64520  | 18.04003 | H | 20.21580 | 8.40861  | 19.81146 |
| C  | 26.59552 | 2.32794  | 17.48754 | H | 21.07724 | 6.86917  | 19.81567 |
| H  | 26.47082 | 1.49552  | 18.19578 | C | 24.13954 | 9.53715  | 16.46557 |
| C  | 24.52772 | 3.41027  | 18.32369 | H | 24.10957 | 10.49798 | 17.00167 |
| H  | 24.04040 | 4.28781  | 18.76333 | H | 24.94743 | 8.94716  | 16.92558 |
| H  | 24.00080 | 3.15477  | 17.39140 | H | 24.41012 | 9.73286  | 15.41983 |
| C  | 26.22298 | 4.71887  | 16.94896 | C | 26.68317 | 7.68007  | 22.86997 |
| H  | 25.87773 | 5.70934  | 17.26630 | C | 27.57516 | 7.39337  | 23.95817 |
| H  | 27.28878 | 4.80511  | 16.69045 | C | 27.39042 | 8.36765  | 24.89128 |
| H  | 25.67195 | 4.43837  | 16.03803 | C | 26.39111 | 9.26362  | 24.37031 |
| H  | 24.40273 | 2.57381  | 19.02717 | N | 25.95089 | 8.84702  | 23.12428 |
| C  | 27.76415 | 3.32307  | 19.89236 | N | 24.43910 | 11.19988 | 23.28080 |
| C  | 28.44444 | 3.66797  | 21.06109 | C | 25.04881 | 11.28619 | 24.52528 |
| H  | 28.59649 | 5.14878  | 22.63134 | C | 24.64100 | 12.48252 | 25.21186 |
| H  | 21.25780 | 13.11338 | 19.79785 | C | 23.79313 | 13.14742 | 24.38073 |
| H  | 28.05020 | 2.40809  | 19.38170 | C | 23.67355 | 12.35681 | 23.18222 |
| H  | 27.66245 | 2.41377  | 17.23377 | C | 25.96686 | 10.39052 | 25.06201 |
| H  | 19.45205 | 6.96854  | 19.09077 | C | 26.53670 | 10.67316 | 26.41437 |
| H  | 25.94776 | 10.04646 | 29.71107 | C | 27.69136 | 11.47120 | 26.53765 |
| H  | 31.32335 | 33.35499 | 17.84462 | H | 2.69798  | 23.05793 | 19.35235 |
| H  | 26.05517 | 2.06367  | 16.56656 | C | 1.70067  | 19.76648 | 20.23925 |
| C  | 6.27205  | 19.76427 | 21.11829 | C | 1.67682  | 19.00660 | 21.40957 |
| C  | 7.71394  | 20.76701 | 19.86685 | H | 2.90584  | 18.14717 | 22.96939 |
| C  | 5.47565  | 19.10446 | 22.03807 | H | 0.75832  | 19.96733 | 19.73768 |
| C  | 8.92178  | 21.99968 | 18.08286 | H | 0.93251  | 20.29315 | 17.58802 |
| C  | 8.92527  | 23.40632 | 18.16612 | C | 29.84256 | 1.54785  | 20.80939 |
| C  | 8.90764  | 24.15401 | 16.98338 | H | 30.15806 | 1.80066  | 19.78635 |
| C  | 8.88833  | 23.54414 | 15.72464 | H | 30.65248 | 0.96667  | 21.27425 |
| C  | 8.88143  | 22.14635 | 15.66894 | C | 30.86722 | 3.63376  | 21.71573 |
| C  | 8.89793  | 21.36046 | 16.82678 | H | 31.17624 | 3.95782  | 20.71117 |
| C  | 8.90189  | 24.36866 | 14.46448 | H | 31.68023 | 3.03157  | 22.14992 |
| H  | 8.41358  | 25.34163 | 14.61532 | H | 9.81834  | 23.80455 | 20.09675 |
| H  | 9.93480  | 24.56873 | 14.13581 | H | 8.05433  | 23.82151 | 20.10269 |
| H  | 8.39203  | 23.85079 | 13.64004 | H | 7.98498  | 19.43384 | 17.19895 |
| C  | 8.93713  | 24.09566 | 19.50477 | H | 4.68048  | 20.22368 | 17.58074 |
| C  | 30.77171 | 33.65474 | 18.74792 | H | 3.19286  | 19.43779 | 17.02382 |
| H  | 31.51228 | 33.94457 | 19.50793 | H | 3.66193  | 21.02326 | 16.36012 |
| H  | 30.17019 | 34.53933 | 18.49141 | H | 29.00164 | 3.21665  | 23.73492 |
| C  | 30.84378 | 31.29541 | 19.50724 | H | 28.24880 | 1.76036  | 23.04994 |
| H  | 30.31158 | 30.41596 | 19.88708 | H | 29.97158 | 1.74262  | 23.51299 |
| H  | 31.38176 | 31.00367 | 18.59202 | C | 24.34540 | 6.80623  | 18.98204 |
| C  | 28.93288 | 32.14288 | 18.05652 | H | 23.89555 | 6.40794  | 18.07787 |
| H  | 28.23964 | 31.33238 | 18.30845 | C | 25.36901 | 6.32468  | 19.76258 |
| H  | 28.33155 | 33.02664 | 17.79670 | C | 27.05380 | 5.64470  | 21.21831 |
| H  | 29.50272 | 31.84248 | 17.16366 | C | 26.36648 | 5.27234  | 20.00834 |
| H  | 31.58825 | 31.58528 | 20.26349 | C | 28.07343 | 4.85560  | 21.72283 |
| C  | 29.19556 | 34.07501 | 21.08822 | C | 29.56754 | 2.80437  | 21.64758 |
| C  | 28.49123 | 34.44722 | 22.23420 | C | 29.17225 | 2.35740  | 23.07115 |
| H  | 27.05430 | 33.77544 | 23.70647 |   |          |          |          |
| H  | 23.83339 | 23.67556 | 20.20297 |   |          |          |          |
| H  | 29.86499 | 34.80222 | 20.63783 |   |          |          |          |
| C  | 25.50743 | 7.28683  | 20.82304 |   |          |          |          |
| C  | 6.05314  | 18.55520 | 23.17144 |   |          |          |          |
| C  | 5.37350  | 17.93521 | 24.27391 |   |          |          |          |
| H  | 4.30224  | 17.78474 | 24.34339 |   |          |          |          |
| H  | 8.90487  | 25.24563 | 17.05013 |   |          |          |          |
| H  | 8.85995  | 21.64919 | 14.69509 |   |          |          |          |
| C  | 6.41081  | 21.01481 | 19.27813 |   |          |          |          |
| H  | 6.27803  | 21.60541 | 18.37694 |   |          |          |          |
| C  | 5.49331  | 20.36374 | 20.06767 |   |          |          |          |
| C  | 4.08346  | 19.24166 | 21.54201 |   |          |          |          |
| C  | 4.08717  | 20.02055 | 20.33016 |   |          |          |          |
| C  | 2.89933  | 18.74572 | 22.06015 |   |          |          |          |
| C  | 0.37807  | 18.45395 | 22.00835 |   |          |          |          |
| C  | 0.18937  | 19.03017 | 23.42779 |   |          |          |          |
| H  | 1.02783  | 18.76742 | 24.08812 |   |          |          |          |
| H  | 0.11678  | 20.12718 | 23.39681 |   |          |          |          |
| H  | -0.73363 | 18.63504 | 23.87947 |   |          |          |          |
| C  | -0.85747 | 18.81930 | 21.17355 |   |          |          |          |

**para-HBC-fused porphyrin-HBC p-HBC**

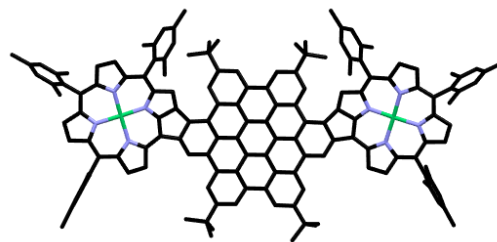

**Cartesian  
Coordinates  
(Angstroms)**

|   | X        | Y        | Z        |   | X        | Y        | Z        |    | X        | Y        | Z        |    |          |          |          |
|---|----------|----------|----------|---|----------|----------|----------|----|----------|----------|----------|----|----------|----------|----------|
| C | 25.22337 | 19.04454 | 22.33624 | C | 23.13034 | 17.82725 | 21.95240 | H  | 12.74904 | 17.16685 | 18.44674 | C  | 26.45951 | 31.12653 | 22.71697 |
| C | 24.52248 | 20.23860 | 22.15950 | C | 21.00168 | 19.06443 | 21.59374 | C  | 23.17526 | 12.79931 | 21.82047 | C  | 25.51019 | 32.09690 | 22.82111 |
| C | 24.50744 | 17.85360 | 22.22227 | C | 20.31708 | 20.29954 | 21.41858 | C  | 22.26542 | 11.56624 | 21.72136 | C  | 24.23304 | 31.43405 | 22.81913 |
| C | 22.44682 | 23.96348 | 21.80493 | C | 18.18649 | 19.07236 | 21.20594 | H  | 21.68393 | 11.56113 | 20.78744 | N  | 24.39137 | 30.05881 | 22.68682 |
| C | 23.14483 | 20.27865 | 21.89991 | C | 18.86510 | 17.83750 | 21.40672 | C  | 24.15451 | 12.77684 | 20.62858 | N  | 21.61520 | 30.08932 | 22.75228 |
| C | 21.03852 | 21.54590 | 21.48013 | C | 20.27923 | 17.83605 | 21.57498 | H  | 24.86043 | 13.61835 | 20.66778 | C  | 21.80837 | 31.44398 | 22.98677 |
| C | 22.43678 | 21.53964 | 21.74079 | C | 20.98541 | 16.59204 | 21.70532 | H  | 24.73984 | 11.84452 | 20.63450 | C  | 20.55286 | 32.11179 | 23.18886 |
| C | 23.12358 | 22.76539 | 21.85427 | C | 18.12544 | 16.60235 | 21.46641 | H  | 24.67692 | 13.54437 | 23.24574 | C  | 19.57749 | 31.16722 | 23.05831 |
| C | 21.02522 | 23.98919 | 21.58666 | C | 16.77422 | 19.06808 | 20.93143 | H  | 23.61051 | 12.83753 | 19.67472 | C  | 20.23274 | 29.92180 | 22.77295 |
| C | 20.33777 | 22.79293 | 21.31456 | C | 20.27565 | 15.36028 | 21.68404 | H  | 20.45151 | 13.21289 | 21.65827 | C  | 23.03163 | 32.10683 | 22.99037 |
| H | 24.19325 | 22.76575 | 22.03504 | C | 20.99486 | 14.15160 | 21.71724 | H  | 21.56468 | 11.50733 | 22.56779 | C  | 23.05157 | 33.58548 | 23.19905 |
| C | 18.90957 | 20.29452 | 21.20061 | C | 22.38354 | 14.11262 | 21.80013 | H  | 22.88010 | 10.65434 | 21.73612 | C  | 22.88445 | 34.45309 | 22.10138 |
| C | 18.23586 | 21.52564 | 20.88572 | C | 23.06325 | 15.33314 | 21.87401 | C  | 23.97239 | 12.70761 | 23.13852 | C  | 22.90156 | 35.83498 | 22.32276 |
| C | 16.11040 | 20.27044 | 20.55714 | C | 22.40378 | 16.56687 | 21.84240 | H  | 23.29658 | 12.72228 | 24.00612 | C  | 23.07829 | 36.37642 | 23.60047 |
| C | 18.95472 | 22.75322 | 20.85467 | C | 16.68695 | 16.61376 | 21.37832 | H  | 24.55208 | 11.77216 | 23.16767 | C  | 23.23954 | 35.49380 | 24.67394 |
| C | 18.34598 | 23.88667 | 20.29353 | C | 15.98956 | 15.42787 | 21.67864 | C  | 26.72295 | 19.08464 | 22.65784 | C  | 23.23118 | 34.10571 | 24.49668 |
| C | 17.01585 | 23.88611 | 19.87080 | C | 16.71726 | 14.19935 | 21.86704 | C  | 26.93791 | 19.85803 | 23.97605 | H  | 18.50066 | 31.28291 | 23.13799 |
| C | 16.28534 | 22.70761 | 20.03803 | C | 18.09237 | 14.18216 | 21.80807 | H  | 26.56893 | 20.89103 | 23.90664 | H  | 20.45318 | 33.17245 | 23.39869 |
| C | 16.86351 | 21.52099 | 20.50808 | C | 18.82320 | 15.37561 | 21.64331 | H  | 26.41003 | 19.36817 | 24.80725 | H  | 27.54021 | 31.22917 | 22.69442 |
| H | 18.95220 | 24.77483 | 20.14873 | C | 14.75915 | 20.21594 | 20.19065 | H  | 28.00995 | 19.89820 | 24.22329 | H  | 25.63886 | 33.17180 | 22.90465 |
| H | 15.23880 | 22.70179 | 19.73963 | C | 14.05406 | 19.01506 | 20.09685 | C  | 27.32225 | 17.68035 | 22.82169 | C  | 23.11966 | 37.86709 | 23.81168 |
| C | 16.34106 | 25.11772 | 19.25275 | C | 14.71426 | 17.84662 | 20.48278 | H  | 27.22427 | 17.08446 | 21.90195 | H  | 24.15138 | 38.24785 | 23.73630 |
| C | 15.30899 | 25.66916 | 20.25883 | C | 16.03549 | 17.85028 | 20.95645 | H  | 28.39441 | 17.76286 | 23.05274 | H  | 22.52016 | 38.39645 | 23.05789 |
| H | 15.79711 | 25.99365 | 21.18926 | H | 14.24624 | 21.13881 | 19.92820 | C  | 27.47188 | 19.80257 | 21.51597 | H  | 22.74278 | 38.14186 | 24.80692 |
| H | 14.78688 | 26.53958 | 19.83209 | H | 14.21033 | 16.89155 | 20.38111 | H  | 27.33943 | 19.26806 | 20.56399 | C  | 22.68736 | 33.90589 | 20.71239 |
| C | 17.34766 | 26.22787 | 18.91815 | H | 24.14957 | 15.31636 | 21.94436 | H  | 27.11107 | 20.83146 | 21.37657 | H  | 21.76364 | 33.31028 | 20.64543 |
| H | 18.11922 | 25.87574 | 18.21739 | H | 18.62075 | 13.24382 | 21.94154 | H  | 28.54894 | 19.85061 | 21.73842 | H  | 22.62726 | 34.71701 | 19.97501 |
| H | 16.82068 | 27.07053 | 18.44689 | H | 25.03201 | 16.91307 | 22.36624 | H  | 26.84624 | 17.12828 | 23.64582 | H  | 23.51288 | 33.23677 | 20.42571 |
| C | 15.62077 | 24.72506 | 17.94644 | H | 14.55768 | 24.90773 | 20.51448 | H  | 25.07489 | 21.17230 | 22.24270 | C  | 23.40649 | 33.18535 | 25.67550 |
| H | 16.33054 | 24.30488 | 17.21896 | C | 12.59941 | 19.01855 | 19.60859 | C  | 25.74060 | 27.44061 | 22.49458 | H  | 22.57162 | 32.47264 | 25.75479 |
| H | 14.83007 | 23.98099 | 18.11494 | C | 12.44882 | 19.91741 | 18.36431 | C  | 24.19062 | 25.90063 | 22.23204 | H  | 24.32340 | 32.58343 | 25.57814 |
| H | 15.15093 | 25.61275 | 17.49631 | H | 12.68049 | 20.97008 | 18.57789 | N  | 24.36777 | 27.27989 | 22.39118 | H  | 23.46734 | 33.75371 | 26.61271 |
| H | 17.84820 | 26.61916 | 19.81353 | H | 13.11180 | 19.58132 | 17.55371 | N  | 21.60320 | 27.45530 | 22.26354 | Ni | 22.99243 | 28.73067 | 22.52431 |
| C | 22.42324 | 19.05292 | 21.80822 | H | 11.41112 | 19.87649 | 17.99997 | C  | 21.81600 | 26.14563 | 22.00413 | H  | 23.37257 | 35.89556 | 25.68245 |
| N | 13.28195 | 13.21060 | 22.42901 | C | 12.11488 | 17.61202 | 19.22770 | C  | 20.61516 | 25.38614 | 21.77184 | H  | 22.77008 | 36.50661 | 21.46966 |
| C | 14.51530 | 13.67107 | 22.12315 | H | 12.09735 | 16.92914 | 20.08682 | C  | 19.59218 | 26.29087 | 21.94428 | C  | 25.45374 | 25.21884 | 22.26864 |
| C | 14.57654 | 15.09435 | 21.91065 | H | 11.08738 | 17.66989 | 18.83997 | C  | 20.21071 | 27.56641 | 22.24503 | H  | 25.59391 | 24.14899 | 22.16410 |
| C | 13.29519 | 15.53695 | 22.16060 | C | 11.70648 | 19.56784 | 20.74136 | C  | 26.42573 | 28.64485 | 22.59025 | C  | 26.41435 | 26.17018 | 22.43197 |
| C | 12.49778 | 14.36395 | 22.46289 | H | 11.75754 | 18.92802 | 21.63427 | C  | 22.94122 | 25.34007 | 22.01885 | H  | 18.51781 | 26.14585 | 21.90426 |
| C | 14.66297 | 8.49692  | 23.14800 | H | 12.01646 | 20.58270 | 21.03105 | C  | 19.53228 | 28.74338 | 22.50806 | H  | 18.04048 | 28.75426 | 22.48327 |
| C | 15.77462 | 13.09559 | 22.14328 | H | 10.65541 | 19.60511 | 20.41583 | C  | 25.76526 | 29.86704 | 22.64594 | C  | 17.36412 | 29.21217 | 21.33321 |
| C | 11.13774 | 14.35323 | 22.72937 | C | 15.96513 | 29.20229 | 21.32281 | H  | 8.08970  | 9.00943  | 19.15319 | C  | 14.87906 | 7.56469  | 25.90041 |
| H | 18.13633 | 11.47433 | 22.71183 | C | 15.22083 | 28.74832 | 22.41631 | Ni | 12.86958 | 11.37211 | 22.66154 | H  | 15.25509 | 8.59823  | 25.94550 |
| C | 13.28613 | 8.42410  | 22.95160 | C | 15.91439 | 28.30731 | 23.54794 | H  | 6.38246  | 7.84909  | 20.23768 | H  | 13.78914 | 7.63403  | 25.76200 |
| C | 12.56111 | 7.18109  | 22.89045 | C | 17.31295 | 28.30144 | 23.60266 | H  | 6.40716  | 7.23224  | 24.49219 | H  | 15.07305 | 7.08461  | 26.86845 |
| C | 11.25201 | 7.49399  | 22.67741 | C | 13.71768 | 28.69479 | 22.35928 | C  | 17.13934 | 11.05130 | 22.76366 | H  | 17.18824 | 4.77396  | 21.90124 |
| C | 11.16402 | 8.93056  | 22.64945 | H | 13.10127 | 29.49131 | 21.72104 | C  | 16.79473 | 9.77677  | 23.10155 | H  | 16.32176 | 5.27995  | 26.08076 |
| N | 12.42627 | 9.49842  | 22.78261 | H | 13.37809 | 27.73325 | 21.93969 | H  | 12.89482 | 16.54550 | 22.16824 | H  | 17.44226 | 8.94462  | 23.36173 |
| N | 10.99689 | 11.86694 | 22.74978 | H | 13.27183 | 28.79072 | 23.35908 | C  | 10.38736 | 15.64103 | 22.78134 | H  | 27.49137 | 26.04647 | 22.49279 |
| C | 9.90723  | 11.00903 | 22.76216 | C | 18.12757 | 29.70430 | 20.13221 | C  | 10.43543 | 16.43388 | 23.94638 | H  | 27.29057 | 29.54718 | 20.02877 |
| C | 8.68538  | 11.74533 | 22.93323 | H | 18.89983 | 28.98381 | 19.82454 | C  | 9.72795  | 17.64108 | 23.97253 | H  | 28.69381 | 28.73729 | 19.28492 |
| C | 9.02642  | 13.06363 | 23.02608 | H | 17.45371 | 29.87329 | 19.28216 | C  | 8.97871  | 18.08224 | 22.87727 | H  | 30.48570 | 28.57148 | 24.87732 |
| C | 10.45253 | 13.14300 | 22.87176 | H | 18.64905 | 30.64955 | 20.34966 | C  | 8.94311  | 17.27620 | 21.73532 | H  | 30.63493 | 28.66280 | 20.58175 |
| C | 9.95939  | 9.62219  | 22.63619 | C | 18.02300 | 27.82466 | 24.84195 | C  | 9.63582  | 16.06286 | 21.66378 | C  | 15.35898 | 9.69451  | 23.02476 |
| C | 8.67837  | 8.86001  | 22.54283 | H | 18.59831 | 26.90677 | 24.64564 | C  | 8.26514  | 19.40679 | 22.91026 | C  | 15.91843 | 11.76288 | 22.50443 |
| C | 8.07995  | 8.33277  | 23.70552 | H | 18.74262 | 28.57481 | 25.20311 | H  | 7.97781  | 19.68367 | 23.93408 | N  | 14.81468 | 10.92560 | 22.69308 |
| C | 6.87299  | 7.63448  | 23.58801 | H | 17.30765 | 27.61287 | 25.64719 | H  | 8.91489  | 20.20898 | 22.52270 | H  | 17.58723 | 2.90952  | 23.53119 |
| C | 6.24761  | 7.44410  | 22.35144 | H | 15.44246 | 29.55337 | 20.42850 | H  | 7.35890  | 19.39115 | 22.28869 | H  | 18.72179 | 3.89262  | 24.47241 |
| C | 6.85819  | 7.98016  | 21.21371 | H | 15.35261 | 27.95768 | 24.41855 | C  | 11.22633 | 15.99133 | 25.14947 | H  | 17.31273 | 3.17221  | 25.27208 |
| C | 8.06441  | 8.68627  | 21.28631 | C | 27.91897 | 28.62804 | 22.63761 | H  | 12.30770 | 15.99394 | 24.94212 | C  | 15.90003 | 6.96484  | 20.97132 |
| H | 8.37979  | 13.92548 | 23.16193 | C | 28.57790 | 28.59965 | 23.88317 | H  | 11.04286 | 16.65444 | 26.00493 | H  | 16.34807 | 7.95997  | 20.82741 |
| H | 7.70017  | 11.29151 | 22.98228 | C | 29.97694 | 28.59038 | 23.90938 | H  | 10.96714 | 14.96322 | 25.44338 | H  | 16.40055 | 6.26132  | 20.29313 |
| H | 13.01956 | 6.20209  | 22.99390 | C | 30.73736 | 28.60895 | 22.73536 | C  | 9.57167  | 15.23114 | 20.40976 | H  | 14.84569 | 7.04916  | 20.66639 |
| H | 10.39998 | 6.82848  | 22.57557 | C | 30.05995 | 28.64000 | 21.51175 | H  | 10.57232 | 14.90355 | 20.09225 | H  | 9.71466  | 8.05627  | 25.09632 |
| C | 4.96303  | 6.66386  | 22.24674 | C | 28.66210 | 28.64761 | 21.44051 | H  | 8.97674  | 14.31754 | 20.56471 | C  | 8.69221  | 9.24974  | 20.03894 |
| H | 5.16359  | 5.58360  | 22.15893 | C | 32.24206 | 28.57123 | 22.78691 | H  | 9.11647  | 15.79869 | 19.58757 | H  | 8.79372  | 10.34414 | 20.10114 |
| H | 4.33278  | 6.80610  | 23.13601 | H | 32.62506 | 29.05557 | 23.69616 | H  | 9.76164  | 18.25193 | 24.87887 | H  | 9.70630  | 8.84945  | 19.88691 |
| H | 4.3836   |          |          |   |          |          |          |    |          |          |          |    |          |          |          |

|   |          |          |          |
|---|----------|----------|----------|
| H | 27.09689 | 27.73174 | 25.20191 |
| H | 27.17644 | 29.49285 | 25.26830 |
| C | 27.96665 | 28.68202 | 20.10546 |
| H | 27.34518 | 27.78559 | 19.95545 |



# meta-HBC-fused porphyrin-HBC *m*-HBC

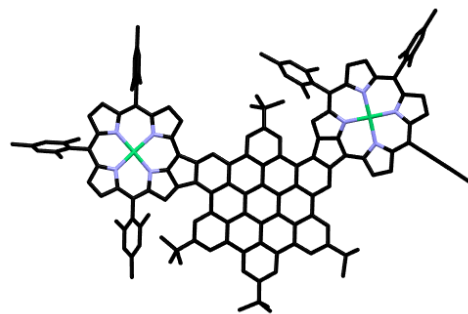

## Cartesian Coordinates (Angstroms)

|   | X        | Y        | Z        |   | X        | Y        | Z        |    | X        | Y        | Z        |    |          |          |          |
|---|----------|----------|----------|---|----------|----------|----------|----|----------|----------|----------|----|----------|----------|----------|
| C | 25.03130 | 19.33920 | 20.37937 | C | 22.31145 | 19.27988 | 21.19920 | H  | 10.92995 | 18.37579 | 23.83149 | C  | 25.75592 | 29.89383 | 23.19365 |
| C | 24.35005 | 20.51459 | 20.70245 | C | 23.03835 | 18.06888 | 21.03825 | H  | 11.79092 | 18.84961 | 20.19025 | C  | 26.45208 | 31.14398 | 23.35535 |
| C | 24.36279 | 18.12791 | 20.57632 | C | 20.89063 | 19.26183 | 21.39511 | C  | 15.94001 | 12.93234 | 21.38054 | C  | 25.53327 | 32.05856 | 23.77116 |
| C | 22.33713 | 24.12435 | 21.90465 | C | 20.17533 | 20.48730 | 21.49557 | C  | 16.41913 | 12.03237 | 22.53880 | C  | 24.27387 | 31.36974 | 23.87162 |
| C | 23.00684 | 20.51776 | 21.10343 | C | 18.06055 | 19.22995 | 21.61262 | H  | 16.19538 | 12.49441 | 23.51147 | N  | 24.40858 | 30.03851 | 23.49212 |
| C | 20.88521 | 21.74059 | 21.52368 | C | 18.78007 | 18.00429 | 21.52600 | C  | 14.41495 | 13.07864 | 21.48409 | N  | 21.68809 | 29.97387 | 24.04438 |
| C | 22.30014 | 21.75411 | 21.39578 | C | 20.19866 | 18.01751 | 21.41330 | H  | 14.00675 | 13.68782 | 20.66387 | C  | 21.91530 | 31.28120 | 24.45229 |
| C | 23.00430 | 22.96318 | 21.57384 | C | 20.93429 | 16.77911 | 21.35825 | H  | 13.94650 | 12.08530 | 21.42582 | C  | 20.71405 | 31.86958 | 24.97573 |
| C | 20.90032 | 24.13572 | 21.99442 | C | 18.06804 | 16.75688 | 21.53552 | H  | 15.93351 | 12.87453 | 19.19135 | C  | 19.73469 | 30.92560 | 24.87348 |
| C | 20.16633 | 22.97205 | 21.70769 | C | 16.62511 | 19.21784 | 21.71785 | H  | 14.11247 | 13.53391 | 22.43903 | C  | 20.33293 | 29.76106 | 24.28393 |
| H | 24.08900 | 22.95771 | 21.51706 | C | 20.23633 | 15.54067 | 21.40857 | H  | 20.43827 | 13.39039 | 21.50734 | C  | 23.11854 | 31.97188 | 24.34900 |
| C | 18.75749 | 20.46634 | 21.60542 | C | 20.96869 | 14.33619 | 21.46261 | H  | 17.50265 | 11.85305 | 22.49344 | C  | 23.17028 | 33.39973 | 24.78288 |
| C | 18.02739 | 21.70362 | 21.62353 | C | 22.34520 | 14.34579 | 21.53561 | H  | 15.91357 | 11.05548 | 22.49547 | C  | 22.81620 | 34.42148 | 23.87998 |
| C | 15.89380 | 20.43704 | 21.76390 | C | 23.06669 | 15.58912 | 21.47772 | C  | 16.27117 | 12.25446 | 20.03464 | C  | 22.86707 | 35.75234 | 24.31111 |
| C | 18.71454 | 22.94780 | 21.58063 | C | 22.37238 | 16.79661 | 21.28821 | H  | 17.35143 | 12.08855 | 19.91831 | C  | 23.25779 | 36.09327 | 25.60996 |
| C | 17.98548 | 24.12006 | 21.32739 | C | 16.64900 | 16.72883 | 21.63928 | H  | 15.76953 | 11.27682 | 19.96739 | C  | 23.59999 | 35.02968 | 26.48895 |
| C | 16.59298 | 24.12425 | 21.22470 | C | 15.98369 | 15.49387 | 21.59282 | C  | 26.47064 | 19.41915 | 19.85495 | C  | 23.56571 | 33.71675 | 26.09837 |
| C | 15.92511 | 22.91321 | 21.42677 | C | 16.66269 | 14.28327 | 21.45663 | C  | 27.38000 | 19.93273 | 20.99146 | H  | 18.68908 | 30.99357 | 25.15897 |
| C | 16.60456 | 21.70265 | 21.61674 | C | 18.05683 | 14.32564 | 21.38887 | H  | 27.05744 | 20.92368 | 21.34330 | H  | 20.64895 | 32.88172 | 25.36333 |
| H | 18.53830 | 25.03906 | 21.16070 | C | 18.78055 | 15.52545 | 21.43983 | H  | 27.36785 | 19.24509 | 21.84947 | H  | 27.51383 | 31.22780 | 23.17160 |
| H | 14.83717 | 22.90405 | 21.38014 | C | 14.50267 | 20.39855 | 21.94995 | H  | 28.42030 | 20.01447 | 20.64035 | H  | 25.67388 | 33.10937 | 24.00600 |
| C | 15.78881 | 25.39452 | 20.91967 | C | 13.79997 | 19.20025 | 22.06295 | C  | 26.99492 | 18.05674 | 19.38039 | C  | 23.33383 | 37.53314 | 26.04457 |
| C | 14.97289 | 25.77487 | 22.17295 | C | 14.52556 | 18.00960 | 21.95584 | H  | 26.36939 | 17.64090 | 18.57658 | H  | 24.35766 | 37.92525 | 25.93093 |
| H | 15.63353 | 25.98468 | 23.02658 | C | 15.91373 | 17.98427 | 21.77407 | H  | 28.01609 | 18.17292 | 18.98866 | H  | 22.67007 | 38.16990 | 25.44353 |
| H | 14.37635 | 26.67964 | 21.97903 | H | 13.95942 | 21.33674 | 22.02940 | C  | 26.54157 | 20.39597 | 18.66314 | H  | 23.05766 | 37.64824 | 27.10237 |
| C | 16.69008 | 26.57812 | 20.54014 | H | 13.98524 | 17.06729 | 22.03121 | H  | 25.88884 | 20.06147 | 17.84356 | C  | 22.38638 | 34.09057 | 22.47518 |
| H | 17.30733 | 26.34965 | 19.65858 | H | 14.89867 | 15.47937 | 21.64895 | H  | 26.23736 | 21.41416 | 18.94263 | H  | 21.46428 | 33.48861 | 22.47132 |
| H | 16.06613 | 27.45131 | 20.29942 | H | 18.59496 | 13.38579 | 21.27987 | H  | 27.57309 | 20.44883 | 18.28260 | H  | 22.20266 | 35.00398 | 21.89449 |
| C | 14.82626 | 25.13612 | 19.74219 | H | 24.86016 | 17.19579 | 20.32782 | H  | 27.04186 | 17.32281 | 20.19575 | H  | 23.15059 | 33.49515 | 21.95286 |
| H | 15.38260 | 24.84926 | 18.83784 | H | 14.28647 | 24.96589 | 22.64253 | H  | 24.86548 | 21.46642 | 20.58239 | C  | 23.94100 | 32.62949 | 27.07024 |
| H | 14.10600 | 24.33640 | 19.96362 | C | 12.28596 | 19.14707 | 22.30285 | C  | 25.70525 | 27.52785 | 22.63233 | H  | 23.13114 | 31.89205 | 27.17840 |
| H | 14.25298 | 26.04881 | 19.51843 | C | 11.65410 | 20.54529 | 22.36205 | C  | 24.13040 | 26.01447 | 22.35706 | H  | 24.82606 | 32.07345 | 26.72375 |
| H | 17.35688 | 26.87288 | 21.36120 | H | 12.07078 | 21.14721 | 23.18323 | N  | 24.33401 | 27.34863 | 22.73011 | H  | 24.16393 | 33.04743 | 28.06056 |
| C | 17.26191 | 29.19171 | 23.26604 | H | 11.79612 | 21.09655 | 21.42043 | N  | 21.59476 | 27.45485 | 23.13244 | Ni | 23.00439 | 28.71490 | 23.35192 |
| C | 15.88265 | 29.15129 | 23.49865 | H | 10.57174 | 20.45213 | 22.53387 | C  | 21.75581 | 26.21659 | 22.61222 | H  | 23.90036 | 35.30375 | 27.51196 |
| C | 15.34128 | 28.52564 | 24.62567 | C | 11.61217 | 18.36093 | 21.15911 | C  | 20.53382 | 25.46620 | 22.48896 | H  | 22.59044 | 36.54465 | 23.60983 |
| C | 16.22180 | 27.93816 | 25.54036 | H | 11.99236 | 17.33196 | 21.09241 | C  | 19.56153 | 26.29194 | 23.00487 | C  | 25.38093 | 35.37341 | 22.06242 |
| C | 17.60808 | 27.95750 | 25.34928 | H | 10.52502 | 18.30808 | 21.32376 | C  | 20.22392 | 27.51985 | 23.39460 | H  | 25.49956 | 24.34068 | 21.75472 |
| C | 13.85172 | 28.44693 | 24.82630 | C | 12.01324 | 18.43395 | 23.64385 | C  | 26.39747 | 28.71712 | 22.82232 | C  | 26.35701 | 26.30743 | 22.23456 |
| H | 13.33414 | 29.27990 | 24.33050 | H | 12.41308 | 17.41012 | 23.64654 | C  | 22.86312 | 25.45929 | 22.26868 | H  | 18.49986 | 26.11891 | 23.14535 |
| H | 13.45089 | 27.51145 | 24.40185 | H | 12.47949 | 18.97916 | 24.47748 | C  | 19.60122 | 28.61619 | 23.96391 | C  | 18.12832 | 28.58742 | 24.20043 |
| H | 13.58689 | 28.46063 | 25.89289 | N | 24.27355 | 11.03305 | 22.13651 | H  | 29.23939 | 8.16105  | 24.80114 | H  | 25.03656 | 7.46294  | 24.97718 |
| H | 17.80366 | 29.87034 | 22.03587 | N | 25.77345 | 13.35359 | 22.15847 | H  | 30.78854 | 8.18440  | 25.68096 | C  | 23.51944 | 7.24735  | 19.92235 |
| H | 18.49646 | 29.21445 | 21.48786 | C | 24.54670 | 13.82023 | 21.83202 | Ni | 26.20922 | 11.50967 | 22.28507 | H  | 23.05573 | 8.24104  | 19.82468 |
| H | 16.99002 | 30.15773 | 21.35723 | C | 24.47289 | 15.25407 | 21.72936 | H  | 32.60992 | 7.43034  | 24.43076 | H  | 24.59844 | 7.38865  | 19.75661 |
| H | 18.37065 | 30.77778 | 22.29624 | C | 25.73351 | 15.69445 | 22.06587 | H  | 32.94272 | 8.20694  | 20.21549 | H  | 23.12810 | 6.60520  | 19.12258 |
| C | 18.52504 | 27.32268 | 26.36094 | C | 26.53410 | 14.51312 | 22.31801 | C  | 21.94635 | 11.10830 | 22.03803 | H  | 22.55432 | 5.05699  | 24.75979 |
| H | 19.06665 | 26.46639 | 25.93031 | C | 24.44980 | 8.57310  | 22.35939 | C  | 22.29798 | 9.81045  | 22.25680 | H  | 22.20194 | 4.94578  | 20.47650 |
| H | 19.28967 | 28.03406 | 26.70802 | C | 23.29620 | 13.23061 | 21.74238 | H  | 26.11610 | 16.70466 | 22.16640 | H  | 21.65566 | 8.94201  | 22.36853 |
| H | 17.96094 | 26.96668 | 27.23271 | C | 27.87486 | 14.50799 | 22.66582 | C  | 28.58925 | 15.80423 | 22.85111 | H  | 27.42922 | 26.20442 | 22.09750 |
| H | 15.21212 | 29.61682 | 22.77095 | H | 20.94578 | 11.51588 | 21.94671 | C  | 29.38571 | 16.32329 | 21.80848 | H  | 34.89918 | 7.37138  | 21.49941 |
| H | 15.82016 | 27.45077 | 26.43301 | C | 25.83982 | 8.54047  | 22.29843 | C  | 30.03482 | 17.54760 | 22.00039 | H  | 34.76210 | 7.04979  | 23.24645 |
| C | 27.87670 | 28.74188 | 22.61207 | C | 26.59619 | 7.31722  | 22.22026 | C  | 29.91192 | 18.27202 | 23.19024 | C  | 30.62027 | 9.56748  | 19.89241 |
| C | 28.74322 | 28.56287 | 23.70882 | C | 27.91227 | 7.66613  | 22.17308 | C  | 29.12090 | 17.73408 | 24.21047 | H  | 30.51484 | 10.65980 | 19.98245 |
| C | 30.12577 | 28.60186 | 23.49302 | C | 27.96767 | 9.10199  | 22.25653 | C  | 28.45530 | 16.51172 | 24.06332 | H  | 31.27995 | 9.35459  | 19.04111 |
| C | 30.66905 | 28.81448 | 22.22191 | N | 26.68576 | 9.63904  | 22.30216 | C  | 30.57506 | 19.61360 | 23.34979 | H  | 29.61825 | 9.17519  | 19.66119 |
| C | 29.78799 | 28.99533 | 21.15009 | N | 28.06267 | 12.02836 | 22.54869 | H  | 31.51826 | 19.66610 | 22.78792 | C  | 30.02618 | 8.64587  | 24.85879 |
| C | 28.39952 | 28.96190 | 21.32132 | C | 29.16559 | 11.18885 | 22.60068 | H  | 29.92267 | 20.41754 | 22.97014 | H  | 30.04249 | 9.70077  | 25.11415 |
| C | 32.15966 | 28.82525 | 22.00767 | C | 30.35706 | 11.93299 | 22.90235 | H  | 30.78742 | 19.83497 | 24.40492 | C  | 23.24813 | 6.64717  | 21.27646 |
| C | 32.69523 | 29.10565 | 22.92526 | C | 29.98500 | 13.23917 | 23.03457 | C  | 29.54072 | 15.52843 | 20.50640 | C  | 21.49224 | 3.57451  | 22.72763 |
| H | 32.52197 | 27.82855 | 21.70730 | C | 28.57305 | 13.30338 | 22.77948 | H  | 28.56842 | 15.25049 | 20.11380 | H  | 21.77290 | 2.99613  | 23.61895 |
| H | 32.44601 | 29.52827 | 21.21261 | C | 29.15299 | 9.81146  | 22.39555 | H  | 30.02081 | 16.21759 | 19.75047 | H  | 20.41213 | 3.78256  | 22.79929 |
| H | 28.19418 | 28.34158 | 25.09347 | C | 30.45336 | 9.07777  | 22.37209 | H  | 30.15438 | 14.67659 | 20.63185 | H  | 21.64379 | 2.94045  | 21.84279 |
| H | 27.51616 | 27.47510 | 25.12208 | C | 31.16493 | 8.96553  | 21.16077 | C  | 27.61413 | 15.96473 | 25.18647 | H  | 30.60209 | 14.10327 | 23.26230 |
| H | 29.00386 | 28.17205 | 25.81522 | C | 32.39058 | 8.29026  | 21.15589 | H  | 26.54491 | 15.96665 | 24.92312 | H  | 31.34399 | 11.49176 | 23.00311 |
| H | 27.60693 | 29.20920 | 25.43266 | C | 32.92757 | 7.72677  | 22.31820 | H  | 27.87878 | 14.92128 | 25.41366 | H  | 26.15224 | 6.32638  | 22.20059 |
| H | 27.48163 | 29.16853 | 20.14555 | C | 32.20398 | 7.85548  | 23.50855 | H  | 27.74049 | 16.56262 |          |    |          |          |          |

C 22.74515 5.50225 23.77925  
C 22.28071 4.85387 22.63004  
C 22.54713 5.44108 21.38848  
C 23.93883 7.37841 24.96953

# ortho-HBC-fused porphyrin-HBC o-HBC

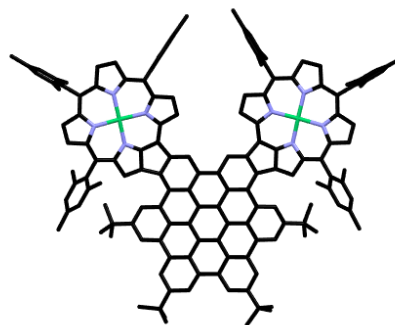

## Cartesian Coordinates (Angstroms)

|   | X        | Y        | Z        |   | X        | Y        | Z        |    | X        | Y        | Z        |    |          |          |          |
|---|----------|----------|----------|---|----------|----------|----------|----|----------|----------|----------|----|----------|----------|----------|
| C | 25.16077 | 19.11943 | 21.24430 | C | 23.04445 | 17.86457 | 21.12393 | H  | 11.76360 | 18.73831 | 20.45329 | C  | 26.62610 | 31.00856 | 22.50741 |
| C | 24.48039 | 20.31274 | 21.15702 | C | 20.91026 | 19.14777 | 21.26041 | C  | 15.92860 | 12.92854 | 22.28124 | C  | 25.70260 | 32.00917 | 22.44539 |
| C | 24.44248 | 17.87174 | 21.26586 | C | 20.21313 | 20.39122 | 21.30323 | C  | 16.58396 | 12.20952 | 23.47888 | C  | 24.40600 | 31.38642 | 22.50650 |
| C | 22.40352 | 24.02289 | 21.48930 | C | 18.07794 | 19.18257 | 21.56541 | H  | 16.49434 | 12.81364 | 24.39355 | N  | 24.53243 | 30.00201 | 22.53983 |
| C | 23.06779 | 20.34762 | 21.16479 | C | 18.77297 | 17.94388 | 21.52844 | C  | 14.43442 | 13.10869 | 22.58479 | N  | 21.78443 | 30.08856 | 22.82730 |
| C | 20.93673 | 21.63214 | 21.26128 | C | 20.18104 | 17.92815 | 21.35596 | H  | 13.90450 | 13.59133 | 21.75011 | C  | 22.00560 | 31.45631 | 22.88755 |
| C | 22.35958 | 21.61104 | 21.22360 | C | 20.86467 | 16.67459 | 21.19513 | H  | 13.97089 | 12.12489 | 22.74867 | C  | 20.79746 | 32.14856 | 23.24261 |
| C | 23.06640 | 22.83223 | 21.29688 | C | 18.04616 | 16.70931 | 21.66437 | H  | 15.60401 | 12.54231 | 20.15019 | C  | 19.82929 | 31.20009 | 23.40345 |
| C | 20.96446 | 24.06301 | 21.51776 | C | 16.64986 | 19.20074 | 21.73716 | C  | 14.27204 | 13.70849 | 23.49263 | C  | 20.43006 | 29.92890 | 23.10883 |
| C | 20.22846 | 22.88460 | 21.31127 | C | 20.13777 | 15.45156 | 21.18488 | H  | 20.22078 | 13.35073 | 20.74576 | C  | 23.22236 | 32.09721 | 22.66177 |
| H | 24.15027 | 22.83233 | 21.25304 | C | 20.79258 | 14.27630 | 20.79827 | H  | 17.65257 | 12.02159 | 23.30375 | C  | 23.25628 | 33.59025 | 22.66104 |
| C | 18.79501 | 20.39955 | 21.43419 | C | 22.13471 | 14.25945 | 20.40599 | H  | 16.09400 | 11.23969 | 23.65579 | C  | 22.96938 | 34.29166 | 21.47307 |
| C | 18.07896 | 21.64174 | 21.35265 | C | 22.85698 | 15.44870 | 20.51999 | C  | 16.06358 | 12.05017 | 21.01979 | C  | 22.98591 | 35.69104 | 21.49194 |
| C | 15.93495 | 20.42797 | 21.67998 | C | 22.26638 | 16.64299 | 20.96337 | H  | 17.11611 | 11.84939 | 20.77517 | C  | 23.27607 | 36.41023 | 22.65582 |
| C | 18.77826 | 22.86543 | 21.17234 | C | 16.64865 | 16.71615 | 21.92901 | H  | 15.56231 | 11.08227 | 21.17399 | C  | 23.55310 | 35.69095 | 23.82345 |
| C | 18.05975 | 24.01282 | 20.80185 | C | 15.98427 | 15.49302 | 22.11623 | C  | 22.75433 | 12.95711 | 19.88438 | C  | 23.54966 | 34.29177 | 23.84823 |
| C | 16.66629 | 24.02013 | 20.71088 | C | 16.64251 | 14.26563 | 22.04706 | C  | 21.89545 | 12.40072 | 18.72982 | H  | 18.78589 | 31.33209 | 23.67386 |
| C | 15.98738 | 22.84719 | 21.05450 | C | 18.00839 | 14.27595 | 21.74766 | H  | 20.86731 | 12.17962 | 19.04843 | H  | 20.72219 | 33.22531 | 23.36002 |
| C | 16.65603 | 21.65787 | 21.37064 | C | 18.72061 | 15.46147 | 21.53607 | H  | 21.84397 | 13.12037 | 17.89966 | H  | 27.72041 | 31.07963 | 22.50931 |
| H | 18.62003 | 24.90429 | 20.53716 | C | 14.55293 | 20.43180 | 21.92705 | H  | 22.33666 | 11.46695 | 18.34912 | H  | 25.86232 | 33.08218 | 22.39352 |
| H | 14.89865 | 22.84447 | 21.02016 | C | 13.84521 | 19.26279 | 22.20222 | C  | 24.18143 | 13.15918 | 19.35611 | C  | 23.31127 | 37.91569 | 22.64908 |
| C | 15.87076 | 25.25391 | 20.26704 | C | 14.55446 | 18.05686 | 22.20343 | H  | 24.87121 | 13.49527 | 20.14163 | H  | 24.33038 | 38.28586 | 22.45094 |
| C | 15.04610 | 25.76963 | 21.46479 | C | 15.93312 | 17.99060 | 21.96947 | H  | 24.56751 | 12.20398 | 18.97111 | H  | 22.65546 | 38.32906 | 21.87025 |
| H | 15.70048 | 26.06989 | 22.29586 | H | 14.02454 | 21.38206 | 21.92410 | C  | 22.79428 | 11.92990 | 21.03523 | H  | 22.99788 | 38.32797 | 23.61859 |
| H | 14.45317 | 26.64884 | 21.16900 | H | 14.00657 | 17.13608 | 22.39748 | H  | 23.41654 | 12.29126 | 21.86669 | C  | 22.64253 | 33.54959 | 20.20426 |
| C | 16.78078 | 26.38584 | 19.77059 | H | 14.91759 | 15.50062 | 22.32362 | H  | 21.78652 | 11.72655 | 21.42577 | H  | 21.72399 | 32.95297 | 20.31697 |
| H | 17.39790 | 26.06365 | 18.91877 | H | 18.53954 | 13.32632 | 21.69249 | H  | 23.22357 | 10.97949 | 20.68232 | H  | 22.49990 | 34.24489 | 19.36680 |
| H | 16.16400 | 27.23395 | 19.43898 | H | 23.89927 | 15.47487 | 20.21734 | H  | 24.20949 | 13.89048 | 18.53473 | H  | 23.44274 | 32.84316 | 19.93654 |
| C | 14.91776 | 24.87160 | 19.11576 | H | 14.35493 | 24.99865 | 21.83508 | H  | 25.03940 | 12.24186 | 21.14210 | C  | 23.84213 | 33.55160 | 25.12657 |
| H | 15.48220 | 24.48750 | 18.25347 | C | 12.34093 | 19.25671 | 22.50117 | C  | 25.79691 | 27.33862 | 22.46412 | H  | 23.02104 | 32.86700 | 25.38870 |
| H | 14.19441 | 24.10107 | 19.41645 | C | 11.72590 | 20.66168 | 22.42905 | C  | 24.21228 | 25.87851 | 21.99798 | H  | 24.74769 | 32.93254 | 25.03134 |
| H | 14.34877 | 25.75550 | 18.78921 | H | 12.17743 | 21.34303 | 23.16540 | N  | 24.42980 | 27.23362 | 22.26297 | H  | 23.98983 | 34.25041 | 25.96025 |
| H | 17.44819 | 26.75804 | 20.55912 | H | 11.84083 | 21.10555 | 21.42883 | N  | 21.67921 | 27.46296 | 22.35282 | Ni | 23.10357 | 28.70742 | 22.49263 |
| C | 22.34430 | 19.12171 | 21.16419 | H | 10.64937 | 20.60304 | 22.64638 | C  | 21.83419 | 26.18503 | 21.94097 | H  | 23.77304 | 36.23380 | 24.74708 |
| C | 17.35490 | 29.23511 | 22.23107 | C | 11.61869 | 18.35860 | 21.47530 | C  | 20.60314 | 25.44200 | 21.86264 | H  | 22.75991 | 36.23306 | 20.56939 |
| C | 15.97626 | 29.22901 | 22.46900 | H | 11.99061 | 17.32485 | 21.50620 | C  | 19.63554 | 26.32036 | 22.30034 | C  | 25.44684 | 25.14750 | 22.07324 |
| C | 15.43503 | 28.75933 | 23.66981 | H | 10.53826 | 18.33394 | 21.68489 | C  | 20.30709 | 27.57306 | 22.58388 | H  | 25.55338 | 24.07753 | 21.93517 |
| C | 16.31530 | 28.29504 | 24.65239 | C | 12.11139 | 18.69915 | 23.92158 | C  | 26.51564 | 28.51974 | 22.61021 | C  | 26.42482 | 26.04507 | 22.38059 |
| C | 17.70141 | 28.28569 | 24.45886 | H | 12.49653 | 17.67447 | 24.02121 | C  | 22.94220 | 25.37318 | 21.75680 | H  | 18.57165 | 26.16785 | 22.44922 |
| C | 13.94549 | 28.71382 | 23.88013 | H | 12.61819 | 19.32378 | 24.67170 | C  | 19.69487 | 28.74511 | 22.99941 | C  | 18.22214 | 28.75889 | 23.23724 |
| H | 13.43898 | 29.53150 | 23.34837 | H | 11.03569 | 18.68224 | 24.15553 | C  | 25.89822 | 29.76709 | 22.55991 | H  | 27.44027 | 14.11068 | 25.31109 |
| H | 13.52689 | 27.76723 | 23.49965 | N | 27.74357 | 16.67881 | 21.94952 | H  | 32.79816 | 15.07810 | 25.29141 | C  | 27.15111 | 12.29979 | 20.41752 |
| H | 13.68721 | 28.78146 | 24.94606 | N | 29.00692 | 19.13653 | 21.75281 | H  | 34.42257 | 15.27173 | 25.99877 | H  | 27.46270 | 13.28060 | 19.98784 |
| C | 17.89237 | 29.74233 | 20.91872 | C | 27.72981 | 19.66689 | 21.53600 | Ni | 29.55873 | 17.23712 | 22.07183 | H  | 28.80760 | 12.28979 | 20.55579 |
| H | 18.63141 | 29.04895 | 20.49113 | C | 27.78548 | 21.09884 | 21.44320 | H  | 36.12276 | 14.02599 | 24.99054 | H  | 27.45576 | 11.52438 | 19.68495 |
| H | 17.08183 | 29.87672 | 20.19058 | C | 29.09057 | 21.45785 | 21.59219 | H  | 36.02807 | 13.03323 | 20.80886 | H  | 25.12868 | 11.43224 | 25.07431 |
| H | 18.40455 | 30.70934 | 21.04306 | C | 29.84265 | 20.24268 | 21.76584 | C  | 25.44037 | 16.83492 | 21.54218 | H  | 26.24056 | 10.14574 | 21.12662 |
| C | 18.61651 | 27.78366 | 25.54442 | C | 27.79633 | 14.30111 | 22.54642 | C  | 25.69686 | 15.53401 | 21.91219 | H  | 25.01661 | 14.69936 | 22.04388 |
| H | 19.13545 | 26.86231 | 25.23791 | C | 26.60651 | 18.86122 | 21.42597 | H  | 29.52896 | 22.45109 | 21.57370 | H  | 27.48663 | 25.86913 | 22.52440 |
| H | 19.39910 | 28.52062 | 25.77911 | C | 31.22898 | 20.22870 | 21.85332 | C  | 31.97301 | 21.52269 | 21.77873 | H  | 38.12625 | 13.06743 | 23.88356 |
| H | 18.05457 | 27.56870 | 26.46267 | H | 26.93651 | 21.75118 | 21.27432 | C  | 32.33713 | 22.04887 | 20.52158 | C  | 33.70271 | 14.27442 | 20.17337 |
| H | 15.30579 | 29.59394 | 21.68571 | C | 29.18313 | 14.31480 | 22.70641 | C  | 33.03721 | 23.25821 | 20.47175 | H  | 33.57653 | 15.31604 | 19.84052 |
| H | 15.91345 | 27.93004 | 25.60164 | C | 29.93613 | 13.14412 | 23.05965 | C  | 33.38223 | 23.96109 | 21.63209 | H  | 34.28982 | 13.73890 | 19.41603 |
| C | 27.99652 | 28.44655 | 22.79010 | C | 31.25519 | 13.48844 | 23.01510 | C  | 33.01022 | 23.41916 | 22.86585 | H  | 32.69506 | 13.83217 | 20.20570 |
| C | 28.53106 | 28.47517 | 24.09472 | C | 31.31080 | 14.87752 | 22.65293 | C  | 32.31121 | 22.20877 | 22.96110 | C  | 33.81715 | 15.44786 | 25.10012 |
| C | 29.91688 | 28.38730 | 24.26087 | N | 30.03397 | 15.39407 | 22.48138 | C  | 34.12022 | 25.27065 | 21.54392 | H  | 33.73205 | 16.53507 | 24.94893 |
| C | 30.78509 | 28.27197 | 23.16973 | N | 31.41856 | 17.76934 | 22.10663 | H  | 34.95807 | 25.21046 | 20.83381 | C  | 24.77595 | 9.38772  | 23.30049 |
| C | 30.23189 | 28.25569 | 21.88542 | C | 32.52716 | 16.93779 | 22.22481 | H  | 33.45515 | 26.07616 | 21.19369 | H  | 24.72425 | 9.08792  | 24.35648 |
| C | 28.84994 | 28.33967 | 21.67403 | C | 33.74584 | 17.69615 | 22.12169 | H  | 34.52044 | 25.57346 | 22.52100 | H  | 23.74104 | 9.54308  | 22.95276 |
| C | 32.27012 | 28.14029 | 23.37928 | C | 33.38805 | 19.00200 | 21.97581 | C  | 31.98395 | 21.31974 | 19.25238 | H  | 25.19268 | 8.55073  | 22.72285 |
| H | 32.61317 | 28.75233 | 24.22569 | C | 31.94878 | 19.04438 | 21.97030 | H  | 30.89337 | 21.21944 | 19.13968 | C  | 26.40533 | 13.82111 | 25.07506 |
| H | 32.54273 | 27.09554 | 23.59972 | C | 32.50340 | 15.57586 | 22.49133 | H  | 32.37298 | 21.84992 | 18.37338 | H  | 25.87887 | 14.74552 | 24.79099 |
| H | 32.83151 | 28.44340 | 22.48476 | C | 33.79391 | 14.83884 | 22.64074 | H  | 32.39398 | 20.29822 | 19.25034 | H  | 25.93672 | 13.42870 | 25.98693 |
| C | 27.62470 | 28.59454 | 25.29132 | C | 34.37101 | 14.20718 | 21.52102 | C  | 31.93245 | 21.65030 | 24.30735 | H  | 34.02347 | 19.87718 | 21.87860 |
| H | 26.87043 | 27.79315 | 25.30312 | C | 35.57866 | 13.51822 | 21.68016 | H  | 30.84453 | 21.50368 | 24.38821 | H  | 34.74004 | 17.26269 | 22.17516 |
| H | 28.19770 | 28.54424 | 26.22626 | C | 36.22396 | 13.43625 | 22.91865 | H  | 32.39380 | 20.66448 | 24.47400 | H  | 29.49046 | 12.18224 | 23.29493 |
| H | 27.06931 | 29.54518 | 25.27817 | C | 35.63191 | 14.07347 | 2        |    |          |          |          |    |          |          |          |

C 25.64970 11.60951 24.12934  
C 25.59019 10.64093 23.12194  
C 26.27462 10.88917 21.92793  
C 26.99663 12.06956 21.72074

**tri-HBC-fused porphyrin-HBC tri-HBC**

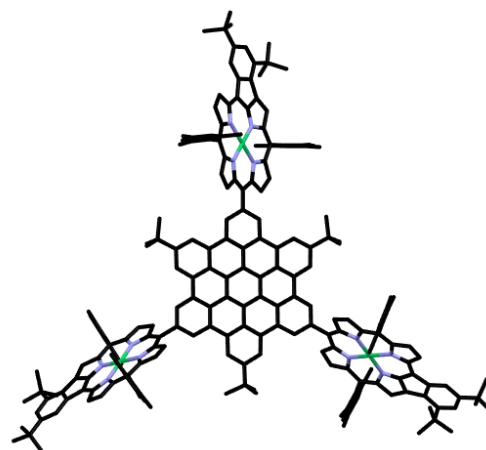

**Cartesian  
Coordinates  
(Angstroms)**

|   | X        | Y        | Z        |   | X        | Y        | Z        |   | X        | Y        | Z        |    | X        | Y        | Z        |
|---|----------|----------|----------|---|----------|----------|----------|---|----------|----------|----------|----|----------|----------|----------|
| C | 25.28757 | 19.23802 | 20.21546 | H | 14.62950 | 25.68326 | 17.60780 | H | 15.93092 | 10.91590 | 19.63090 | C  | 22.57198 | 34.39695 | 21.80923 |
| C | 24.55542 | 20.41179 | 20.40064 | H | 17.41079 | 26.68813 | 19.84056 | C | 17.07420 | 12.46573 | 17.66329 | C  | 22.55587 | 35.78666 | 21.97247 |
| C | 24.60425 | 18.02330 | 20.32130 | C | 22.47232 | 19.16645 | 20.59239 | H | 18.12761 | 12.24447 | 17.88413 | C  | 22.73691 | 36.38510 | 23.22388 |
| C | 22.36156 | 24.04101 | 21.10692 | C | 23.22345 | 17.95731 | 20.56322 | H | 16.61439 | 11.54690 | 17.26844 | C  | 22.93194 | 35.55225 | 24.33076 |
| C | 23.16426 | 20.41062 | 20.57776 | C | 21.03868 | 19.14094 | 20.57933 | C | 26.79321 | 19.31970 | 19.93281 | C  | 22.95737 | 34.15783 | 24.21178 |
| C | 20.99091 | 21.62256 | 20.65078 | C | 20.30363 | 20.35878 | 20.56643 | C | 27.50795 | 19.80018 | 21.21370 | H  | 18.31489 | 31.12028 | 23.28124 |
| C | 22.41112 | 21.64803 | 20.71350 | C | 18.19793 | 19.07765 | 20.42991 | H | 27.13325 | 20.78362 | 21.53343 | H  | 20.20977 | 33.08157 | 23.35268 |
| C | 23.07425 | 22.87533 | 20.92116 | C | 18.94183 | 17.86429 | 20.42358 | H | 27.35646 | 19.09169 | 22.04094 | H  | 27.32118 | 31.28234 | 22.61214 |
| C | 20.92522 | 24.04011 | 21.00568 | C | 20.36135 | 17.89085 | 20.49922 | H | 28.59151 | 19.88450 | 21.03773 | H  | 25.38872 | 33.20272 | 22.70783 |
| C | 20.24339 | 22.85275 | 20.68563 | C | 21.10582 | 16.65742 | 20.52614 | C | 27.38006 | 17.96324 | 19.51846 | C  | 22.74839 | 37.88385 | 23.37036 |
| H | 24.15754 | 22.88891 | 20.99335 | C | 18.25385 | 16.61813 | 20.25286 | H | 26.88299 | 17.56539 | 18.62136 | H  | 23.76545 | 38.28509 | 23.23040 |
| C | 18.88185 | 20.32183 | 20.49716 | C | 16.75812 | 19.04369 | 20.40426 | H | 28.44948 | 18.07972 | 19.28999 | H  | 22.10251 | 38.36561 | 22.62294 |
| C | 18.14471 | 21.54791 | 20.40311 | C | 20.41857 | 15.41885 | 20.40110 | C | 27.06429 | 20.32081 | 18.79110 | H  | 22.41014 | 38.19272 | 24.36928 |
| C | 16.02349 | 20.26011 | 20.40409 | C | 21.12628 | 14.21156 | 20.56673 | H | 26.54519 | 20.01595 | 17.87077 | C  | 22.36909 | 33.78581 | 20.44803 |
| C | 18.81694 | 22.80090 | 20.38638 | C | 22.46541 | 14.22101 | 20.89431 | H | 26.73592 | 21.33883 | 19.04214 | H  | 21.47262 | 33.14686 | 20.42763 |
| C | 18.10330 | 23.94610 | 19.99882 | C | 23.19058 | 15.46334 | 20.97116 | H | 28.14348 | 20.36365 | 18.57933 | H  | 22.25573 | 34.56230 | 19.68031 |
| C | 16.73050 | 23.91838 | 19.73794 | C | 22.53520 | 16.67746 | 20.69475 | H | 27.30009 | 17.21474 | 20.31748 | H  | 23.21766 | 33.14306 | 20.16813 |
| C | 16.05686 | 22.71009 | 19.93409 | C | 16.83706 | 16.57729 | 20.13786 | H | 25.08014 | 21.36422 | 20.34847 | C  | 23.16630 | 33.29321 | 25.42683 |
| C | 16.72910 | 21.52293 | 20.25695 | C | 16.22527 | 15.39564 | 19.69208 | C | 25.58156 | 27.47548 | 22.25643 | H  | 22.33872 | 32.57923 | 25.55696 |
| H | 18.65646 | 24.86809 | 19.85064 | C | 16.95127 | 14.22490 | 19.45489 | C | 24.06860 | 25.95400 | 21.75654 | H  | 24.08570 | 32.69404 | 25.33728 |
| H | 14.98128 | 22.67508 | 19.76367 | C | 18.31894 | 14.24058 | 19.73831 | N | 24.21858 | 27.31123 | 22.06340 | H  | 23.24180 | 33.90418 | 26.33575 |
| C | 15.95252 | 25.14928 | 19.25560 | C | 18.98963 | 15.40691 | 20.13330 | N | 21.45715 | 27.43303 | 22.00740 | Ni | 22.82142 | 28.72291 | 22.30340 |
| C | 14.95115 | 25.56800 | 20.35220 | C | 14.62296 | 20.22718 | 20.56684 | C | 21.68736 | 26.16882 | 21.58531 | H  | 23.06557 | 35.99918 | 25.31994 |
| H | 15.47344 | 25.84869 | 21.27819 | C | 13.96424 | 19.02802 | 20.74907 | C | 20.49301 | 25.39563 | 21.36501 | H  | 22.39442 | 36.41861 | 21.09455 |
| H | 14.36405 | 26.43799 | 20.01986 | C | 14.68315 | 17.78317 | 20.66036 | C | 19.46221 | 26.23539 | 21.72276 | C  | 25.33755 | 25.28301 | 21.80054 |
| C | 16.87280 | 26.33887 | 18.94952 | C | 16.06436 | 17.78426 | 20.40265 | C | 20.06602 | 27.49584 | 22.10651 | H  | 25.49463 | 24.22604 | 21.61716 |
| H | 17.61243 | 26.08969 | 18.17432 | H | 14.07303 | 21.16335 | 20.61255 | C | 26.24440 | 28.68041 | 22.45658 | C  | 26.27358 | 26.22016 | 22.11963 |
| H | 16.27070 | 27.18298 | 18.58269 | H | 15.16056 | 15.41876 | 19.48092 | C | 22.83177 | 25.39851 | 21.46190 | H  | 18.39325 | 26.05330 | 21.75697 |
| C | 15.18283 | 24.80104 | 17.96445 | H | 18.89315 | 13.32697 | 19.58905 | C | 19.37625 | 28.62665 | 22.50997 | C  | 17.88758 | 28.58324 | 22.59648 |
| H | 15.87557 | 24.48566 | 17.17053 | H | 25.14207 | 17.09341 | 20.16749 | C | 25.56795 | 29.89520 | 22.51126 | C  | 17.11069 | 29.08540 | 21.53129 |
| H | 14.45702 | 23.99095 | 18.12058 | H | 14.25117 | 24.75297 | 20.58692 | C | 26.24185 | 31.16531 | 22.59411 | C  | 15.71623 | 29.01894 | 21.62245 |
| H | 18.24842 | 30.63882 | 20.54128 | C | 16.30664 | 12.94304 | 18.91349 | C | 25.27635 | 32.12492 | 22.63882 | C  | 15.07317 | 28.46447 | 22.73351 |
| C | 18.08201 | 27.49183 | 24.87642 | C | 16.37496 | 11.85226 | 20.00252 | C | 24.00857 | 31.44430 | 22.61146 | C  | 15.86527 | 27.97713 | 23.77830 |
| H | 18.64241 | 26.59106 | 24.58122 | H | 15.81929 | 12.15513 | 20.90163 | N | 24.19228 | 30.06989 | 22.50293 | C  | 17.26320 | 28.02618 | 23.73100 |
| H | 18.82733 | 28.22756 | 25.21373 | C | 14.83892 | 13.15157 | 18.51672 | N | 21.42588 | 30.03524 | 22.63932 | C  | 13.57296 | 28.35507 | 22.78261 |
| H | 17.44109 | 27.22954 | 25.72822 | H | 14.73546 | 13.92739 | 17.74376 | C | 21.59065 | 31.39721 | 22.84906 | H  | 13.09170 | 29.16637 | 22.21878 |
| H | 15.11601 | 29.40331 | 20.79301 | H | 14.43233 | 12.21371 | 18.11084 | C | 20.33170 | 32.02280 | 23.14471 | H  | 13.23733 | 27.40323 | 22.33859 |
| H | 15.38324 | 27.54550 | 24.65990 | H | 17.04851 | 13.23070 | 16.87355 | C | 19.38454 | 31.04127 | 23.11110 | H  | 13.20015 | 28.38290 | 23.81585 |
| C | 27.73394 | 28.68279 | 22.57366 | H | 14.21311 | 13.43209 | 19.37420 | C | 20.05630 | 29.81880 | 22.76920 | C  | 17.76155 | 29.67867 | 20.30970 |
| C | 28.33431 | 28.62651 | 23.84723 | H | 20.59336 | 13.26773 | 20.49388 | C | 22.79389 | 32.09431 | 22.78227 | H  | 18.54603 | 29.01784 | 19.91215 |
| C | 29.73088 | 28.63915 | 23.93909 | H | 17.41429 | 11.64495 | 20.29608 | C | 22.77776 | 33.57975 | 22.93896 | H  | 17.02145 | 29.85255 | 19.51768 |
| C | 30.54465 | 28.70799 | 22.80346 | C | 27.78494 | 7.47953  | 22.21592 | C | 28.87215 | 17.47761 | 24.55665 | C  | 5.89649  | 18.87067 | 22.47964 |
| C | 29.92469 | 28.77031 | 21.55086 | C | 27.86435 | 8.91617  | 22.26210 | C | 28.22298 | 16.26545 | 24.29660 | C  | 5.51644  | 17.56606 | 22.38376 |
| C | 28.53198 | 28.75764 | 21.41399 | N | 26.59086 | 9.47356  | 22.24133 | C | 30.41980 | 19.37317 | 23.92576 | H  | 5.27797  | 19.75179 | 22.62129 |
| C | 32.04573 | 28.69056 | 22.92312 | N | 27.97687 | 11.83708 | 22.59148 | H | 31.41994 | 19.43690 | 23.47460 | C  | 11.43834 | 20.98043 | 21.55345 |
| H | 32.37720 | 29.11099 | 23.88279 | C | 29.06729 | 10.98598 | 22.68562 | H | 29.81699 | 20.19413 | 23.50325 | C  | 10.18423 | 21.32023 | 21.96151 |
| H | 32.43397 | 27.66056 | 22.86474 | C | 30.23783 | 11.70874 | 23.10046 | H | 30.51427 | 19.55839 | 25.00469 | C  | 7.36385  | 21.37025 | 22.62858 |
| H | 32.51960 | 29.26317 | 22.11346 | C | 29.86097 | 13.00968 | 23.27155 | C | 29.69437 | 15.44548 | 20.85226 | C  | 7.23331  | 21.82124 | 23.95735 |
| C | 27.48832 | 28.56025 | 25.09114 | C | 28.47222 | 13.09779 | 22.91444 | H | 28.77121 | 15.12253 | 20.34927 | C  | 6.56569  | 23.02687 | 24.20134 |
| H | 26.81302 | 27.69140 | 25.07041 | C | 29.05196 | 9.61182  | 22.45193 | H | 30.25465 | 16.10785 | 20.17193 | C  | 6.02562  | 23.79456 | 23.16428 |
| H | 28.11463 | 28.49028 | 25.99000 | C | 30.34509 | 8.86519  | 22.47380 | H | 30.29918 | 14.53891 | 21.01057 | C  | 6.16379  | 23.32313 | 21.85443 |
| H | 26.84785 | 29.45089 | 25.18541 | C | 31.10164 | 8.75909  | 21.28916 | C | 27.25873 | 15.69082 | 25.30082 | C  | 6.82485  | 22.12366 | 21.56614 |
| C | 27.90032 | 28.83345 | 20.04915 | C | 32.31956 | 8.07091  | 21.32272 | H | 26.22585 | 15.70787 | 24.91955 | C  | 7.79942  | 21.01805 | 25.09842 |
| H | 27.29622 | 27.93773 | 19.83744 | C | 32.80587 | 7.48803  | 22.49766 | H | 27.49225 | 14.63935 | 25.52498 | H  | 8.88414  | 20.87010 | 24.98353 |
| H | 27.21967 | 29.69504 | 19.97077 | C | 32.03926 | 7.61185  | 23.66121 | H | 27.28398 | 16.26082 | 26.23873 | H  | 7.61924  | 21.51769 | 26.05920 |
| H | 28.66498 | 28.92529 | 19.26677 | C | 30.81473 | 8.28990  | 23.67163 | H | 30.72471 | 17.78140 | 21.73173 | H  | 7.35016  | 20.01382 | 25.14147 |
| H | 30.19467 | 28.59771 | 24.92868 | H | 30.46391 | 13.85645 | 23.58580 | H | 28.66616 | 17.99357 | 25.49851 | C  | 6.94794  | 21.64482 | 20.14387 |
| H | 30.54224 | 28.83528 | 20.65051 | H | 31.21380 | 11.25734 | 23.25133 | C | 23.55097 | 7.18888  | 22.32667 | H  | 8.00267  | 21.53581 | 19.84819 |
| C | 23.65603 | 9.65368  | 22.00091 | H | 26.00155 | 6.17104  | 22.22731 | C | 23.21379 | 6.70479  | 23.60686 | H  | 6.48327  | 20.65529 | 20.01399 |
| C | 23.17588 | 11.74301 | 21.48085 | H | 28.64795 | 6.82050  | 22.20865 | C | 22.48023 | 5.51784  | 23.71070 | H  | 6.46597  | 22.34575 | 19.44990 |
| N | 24.23647 | 10.89992 | 21.82597 | C | 34.10611 | 6.72815  | 22.50349 | C | 22.07525 | 4.79917  | 22.58081 | H  | 6.46280  | 23.37293 | 25.23365 |
| N | 25.75709 | 13.19556 | 22.00106 | H | 33.94299 | 5.66598  | 22.25816 | C | 22.43077 | 5.29456  | 21.32187 | H  | 5.74137  | 23.90359 | 21.02938 |
| C | 24.59332 | 13.67713 | 21.51019 | H | 34.80932 | 7.12990  | 21.76046 | C | 23.16182 | 6.47904  | 21.17284 | H  | 9.78109  | 22.30983 | 22.16523 |
| C | 24.54348 | 15.11353 | 21.42362 | H | 34.58858 | 6.76496  | 23.49021 | C | 5.43994  | 14.66051 | 22.32230 | C  | 3.59040  | 13.54922 | 21.22899 |
| C | 25.74579 | 15.53614 | 21.94829 | C | 30.61232 | 9.38110  | 20.00796 | C | 4.79914  | 14.24886 | 21.13702 | C  | 3.00325  | 13.24833 | 22.46211 |

|    |          |          |          |   |          |          |          |
|----|----------|----------|----------|---|----------|----------|----------|
| C  | 26.49869 | 14.34278 | 22.28350 | C | 3.66140  | 13.66414 | 23.62466 |
| C  | 24.33302 | 8.45562  | 22.20363 | C | 4.87050  | 14.36708 | 23.57810 |
| C  | 23.36265 | 13.09869 | 21.24385 | H | 9.75387  | 11.93095 | 22.54250 |
| C  | 27.79251 | 14.31238 | 22.78066 | H | 7.11467  | 12.61991 | 22.55402 |
| H  | 20.96169 | 11.43811 | 21.26419 | H | 4.51892  | 17.14037 | 22.43711 |
| C  | 25.72430 | 8.39241  | 22.23492 | H | 20.18126 | 3.77508  | 22.76175 |
| C  | 26.46128 | 7.15479  | 22.23053 | H | 21.41037 | 2.86905  | 21.86086 |
| C  | 1.68718  | 12.52007 | 22.53658 | C | 23.63803 | 7.45069  | 24.84432 |
| H  | 0.84527  | 13.23036 | 22.57682 | H | 23.26158 | 8.48492  | 24.83691 |
| H  | 1.53257  | 11.87921 | 21.65741 | H | 23.26715 | 6.95416  | 25.75046 |
| H  | 1.62598  | 11.89192 | 23.43645 | H | 24.73480 | 7.51872  | 24.91254 |
| C  | 5.40403  | 14.55342 | 19.79206 | C | 23.53175 | 6.97834  | 19.80123 |
| H  | 6.40477  | 14.10543 | 19.69303 | C | 6.71874  | 16.79052 | 22.22778 |
| H  | 4.77243  | 14.16898 | 18.98060 | N | 7.83365  | 17.61996 | 22.18060 |
| H  | 5.53126  | 15.63722 | 19.64739 | N | 9.19950  | 15.21325 | 22.11766 |
| C  | 5.55124  | 14.79678 | 24.85063 | C | 7.92475  | 14.68051 | 22.24518 |
| H  | 6.56524  | 14.37469 | 24.92426 | C | 7.98500  | 13.25678 | 22.42780 |
| H  | 4.97879  | 14.47481 | 25.73026 | C | 9.30552  | 12.91300 | 22.42537 |
| Ni | 9.66932  | 17.08681 | 21.90811 | C | 10.05476 | 14.11787 | 22.20213 |
| H  | 3.22393  | 13.43278 | 24.60001 | C | 7.33006  | 18.90168 | 22.34387 |
| H  | 3.09620  | 13.22802 | 20.30767 | C | 6.73386  | 15.40215 | 22.24175 |
| C  | 12.20591 | 12.84966 | 22.06097 | C | 21.25764 | 3.54177  | 22.71626 |
| C  | 12.94267 | 12.53047 | 23.21974 | H | 21.51105 | 2.99475  | 23.63532 |
| C  | 12.95251 | 13.45839 | 24.40578 | N | 10.21945 | 19.00437 | 21.76245 |
| H  | 13.46453 | 14.40412 | 24.16956 | C | 11.43685 | 14.12642 | 21.99765 |
| H  | 11.93046 | 13.72470 | 24.71400 |   |          |          |          |
| H  | 13.46508 | 12.99833 | 25.26057 |   |          |          |          |
| C  | 5.33787  | 25.10421 | 23.44677 |   |          |          |          |
| H  | 4.87227  | 25.10700 | 24.44221 |   |          |          |          |
| H  | 6.05555  | 25.94039 | 23.41912 |   |          |          |          |
| H  | 4.55933  | 25.31803 | 22.70106 |   |          |          |          |
| C  | 11.46437 | 19.54977 | 21.43016 |   |          |          |          |
| N  | 11.45958 | 16.54239 | 21.58364 |   |          |          |          |
| C  | 12.09148 | 15.30013 | 21.66304 |   |          |          |          |
| C  | 12.20071 | 11.97197 | 20.95657 |   |          |          |          |
| C  | 13.67819 | 10.44680 | 22.17071 |   |          |          |          |
| C  | 13.66567 | 11.33261 | 23.25311 |   |          |          |          |
| H  | 14.61209 | 8.81085  | 23.23684 |   |          |          |          |
| H  | 10.33752 | 12.24419 | 19.88787 |   |          |          |          |
| H  | 14.23372 | 11.08479 | 24.15410 |   |          |          |          |
| C  | 12.93619 | 10.78428 | 21.03447 |   |          |          |          |
| H  | 14.05526 | 8.39414  | 21.59580 |   |          |          |          |
| C  | 11.42274 | 12.29943 | 19.70940 |   |          |          |          |
| H  | 11.67179 | 11.60234 | 18.89870 |   |          |          |          |
| H  | 12.93484 | 10.10753 | 20.17543 |   |          |          |          |
| C  | 12.44748 | 17.37725 | 21.18835 |   |          |          |          |
| C  | 13.49302 | 15.41004 | 21.31038 |   |          |          |          |
| C  | 14.50232 | 9.18799  | 22.21052 |   |          |          |          |
| H  | 30.50012 | 10.47150 | 20.11102 |   |          |          |          |
| H  | 31.30949 | 9.18314  | 19.18336 |   |          |          |          |
| H  | 29.62261 | 8.99077  | 19.72587 |   |          |          |          |
| C  | 30.02148 | 8.40995  | 24.94589 |   |          |          |          |
| H  | 29.83394 | 9.46391  | 25.20208 |   |          |          |          |
| H  | 29.03491 | 7.93091  | 24.84936 |   |          |          |          |
| H  | 30.55153 | 7.93954  | 25.78427 |   |          |          |          |
| Ni | 26.15074 | 11.34722 | 22.16349 |   |          |          |          |
| H  | 32.40598 | 7.17230  | 24.59306 |   |          |          |          |
| H  | 32.90667 | 7.99300  | 20.40323 |   |          |          |          |
| C  | 21.93718 | 11.01496 | 21.47705 |   |          |          |          |
| C  | 22.22936 | 9.72759  | 21.81719 |   |          |          |          |
| H  | 26.11541 | 16.54124 | 22.12306 |   |          |          |          |
| C  | 28.48932 | 15.59550 | 23.08483 |   |          |          |          |
| C  | 29.39834 | 16.14245 | 22.15429 |   |          |          |          |
| C  | 30.02545 | 17.35595 | 22.45703 |   |          |          |          |
| C  | 29.77354 | 18.04254 | 23.64889 |   |          |          |          |
| H  | 15.51647 | 9.37372  | 21.81937 |   |          |          |          |
| H  | 11.63103 | 13.32250 | 19.36301 |   |          |          |          |
| C  | 12.54957 | 18.75565 | 21.08795 |   |          |          |          |
| C  | 13.71551 | 16.72839 | 20.98087 |   |          |          |          |
| H  | 14.18054 | 14.57144 | 21.33973 |   |          |          |          |
| H  | 5.66337  | 15.89117 | 24.89332 |   |          |          |          |
| H  | 12.27889 | 21.64056 | 21.37069 |   |          |          |          |
| H  | 23.08484 | 7.96424  | 19.60033 |   |          |          |          |
| H  | 24.62088 | 7.10285  | 19.70165 |   |          |          |          |
| H  | 23.19116 | 6.28194  | 19.02392 |   |          |          |          |
| H  | 22.22051 | 5.14378  | 24.70505 |   |          |          |          |
| H  | 22.13453 | 4.74186  | 20.42581 |   |          |          |          |
| H  | 21.55496 | 8.88281  | 21.92138 |   |          |          |          |
| H  | 27.34581 | 26.09680 | 22.23999 |   |          |          |          |
| C  | 9.42846  | 20.10116 | 22.06733 |   |          |          |          |
| C  | 8.06834  | 20.08155 | 22.35313 |   |          |          |          |

## 5 References

- [1] Q. Chen, L. Brambilla, L. Daukiya, K. S. Mali, S. de Feyter, M. Tommasini, K. Müllen, A. Narita, *Angew. Chem., Int. Ed. Engl.* **2018**, *57*, 11233-11237.
- [2] R. Mishra, R. Regar, R. Singhal, P. Panini, G. D. Sharma, J. Sankar, *J. Mater. Chem. A* **2017**, *5*, 15529-15533.
- [3] D. Lungerich, D. Reger, H. Hölzel, R. Riedel, M. M. Martin, F. Hampel, N. Jux, *Angew. Chem., Int. Ed. Engl.* **2016**, *55*, 5602-5605.
- [4] K. D. Seo, M. J. Lee, H. M. Song, H. S. Kang, H. K. Kim, *Dyes Pigment.* **2012**, *94*, 143-149.
- [5] P. Giannozzi *et al.*, *J. Condens. Matter Phys.* **2009**, *21*, 395502.
- [6] J. P. Perdew, K. Burke, M. Ernzerhof, *Phys. Rev. Lett.* **1996**, *77*, 3865-3868.
- [7] S. Grimme, S. Ehrlich, L. Goerigk, *J. Comput. Chem.* **2011**, *32*, 1456-1465.
- [8] S. Grimme, J. Antony, S. Ehrlich, H. Krieg, *J. Chem. Phys.* **2010**, *132*, 154104.
- [9] D. Vanderbilt, *Phys. Rev. B* **1990**, *41*, 7892-7895.
- [10] T. M. Krygowski, *J. Chem. Inf. Comput. Sci.* **1993**, *33*, 70-78.
- [11] J. C. Dobrowolski, S. Ostrowski, *J. Chem. Inf. Model.* **2023**, *63*, 7744-7754.
- [12] C. Oleszak, P. R. Schol, C. L. Ritterhoff, M. Krug, M. M. Martin, Y. Bo, B. Meyer, T. Clark, D. M. Guldi, N. Jux, *Angew. Chem., Int. Ed. Engl.* **2024**, e202409363.
- [13] F. Neese, *WIREs Comput. Mol. Sci.* **2012**, *2*, 73-78.
- [14] C. Lee, W. Yang, R. G. Parr, *Phys. Rev B* **1988**, *37*, 785-789.
- [15] A. D. Becke, *J. Chem. Phys.* **1993**, *98*, 1372-1377.
- [16] F. Weigend, R. Ahlrichs, *Phys. Chem. Chem. Phys.* **2005**, *7*, 3297.
- [17] F. Neese, F. Wennmohs, A. Hansen, U. Becker, *Chem. Phys.* **2009**, *356*, 98-109.
